# Supplementary material for: Enhancement of catalytic activity of Pd-PVP colloid for direct H2O2synthesis from H2and O2in water with addition of 0.5 atom% Pt or Ir
Source: Royal Society of Chemistry journal article supplement (doi:10.1039/c7cy01890h), 2018-01-01
Supplement: c7cy01890h1.pdf [file c7cy01890h1.pdf]

## Enhancement of catalytic activity of Pd-PVP colloid for direct H<sub>2</sub>O<sub>2</sub> synthesis from H<sub>2</sub> and O<sub>2</sub> in water with addition of 0.5 atom% Pt or Ir

### Supporting Information

|                                                                              |      |
|------------------------------------------------------------------------------|------|
| S1. Experimental Details.                                                    | P.01 |
| S2. Original CASTEP data; Energy level of H on the first layer of M-Pd(111). | P.68 |

Takashi Deguchi<sup>a</sup>, Hitoshi Yamano<sup>b,c</sup>, Sho Takenouchi<sup>b,d</sup>, and Masakazu Iwamoto<sup>a,e</sup>

<sup>a</sup> Research and Development Initiative, Chuo University, 1-13-27 Kasuga, Bunkyo-ku, Tokyo 112-8551, Japan.

<sup>b</sup> Chemical Resources Laboratory, Tokyo Institute of Technology, 4259-R1-5 Nagatsuta, Midori-ku, Yokohama 226-8503, Japan

<sup>c</sup> Present affiliation: Tokyo Ohka Kogyo Co., Ltd., 1590 Tabata, Samukawa-machi, Koza-gun, Kanagawa 253-0114, Japan.

<sup>d</sup> Present affiliation: Tanaka Kikinzoku Kogyo K.K., 2-14 Nagatoro, Hiratsuka, Kanagawa 254-0021, Japan.

<sup>e</sup> Present affiliation: Research Institute for Science and Engineering, Waseda University, 3-4-1 Okubo, Shinjuku-ku, Tokyo 169-8555, Japan.

### S1. Experimental Details

All the data sheets describing the experimental details of the H<sub>2</sub>-O<sub>2</sub> reaction are shown in the following pages. The items contained in the data sheets are:

- 1) Concentrations of the catalysts and additives charged.
- 2) Reaction conditions: ambient temperature ( $T_0$ ), reaction temperature ( $T$ ), ambient atmosphere ( $P_0$ ), inner pressure ( $P$ ), agitation speed.
- 3) Feed rates of H<sub>2</sub>, O<sub>2</sub> and N<sub>2</sub> (set and calibrated). "Feed gas measurement" describes the calibration data obtained by measuring the flow rate of each gas using a soap-film flow meter before the reaction.
- 4) Results of GC calibration. The combined feed gas was put in GC three times before and after the reaction run respectively, and the ratios of sensitivity of H<sub>2</sub> and O<sub>2</sub> against N<sub>2</sub> were determined as the averages.
- 5) GC counts of H<sub>2</sub>, O<sub>2</sub> and N<sub>2</sub> at every sampling time.
- 6) Corrected elapsed time,  $t_{\text{correct}}$ , and reaction parameters at every sampling time: outlet flows, conversions, partial pressures, reaction rates all of H<sub>2</sub> and O<sub>2</sub>, as well as  $d[\text{H}_2\text{O}_2]/dt$ ,  $\Sigma[\text{H}_2]$  ( $= \int r_{\text{H}_2} dt$ ),  $[\text{H}_2\text{O}_2]$ ,  $S_e$ ,  $\Sigma_1/[\text{H}_2\text{O}_2]$  and  $\Sigma_2/[\text{H}_2\text{O}_2]$ .
- 7) Values of  $S_f$  and  $k_d[\text{Cat}]$  calculated from  $\Sigma_1/[\text{H}_2\text{O}_2]$  and  $\Sigma_2/[\text{H}_2\text{O}_2]$  as well as the value of  $R^2$ .

## H<sub>2</sub>O<sub>2</sub> Synthesis Data Sheet

Entry No. 1 (Exp. Y01) Employed in: Table 1 Table 2 Fig 3 Fig 4 Fig 5 Fig 9 Fig 10 Fig 11

| Catalyst, Additives                                                              |                        |                 | Reaction conditions                          |                 | Gas feed rate (sccm)                                                                                               |                                            |                                                          |                                                          |                                                     |                                                      |                |
|----------------------------------------------------------------------------------|------------------------|-----------------|----------------------------------------------|-----------------|--------------------------------------------------------------------------------------------------------------------|--------------------------------------------|----------------------------------------------------------|----------------------------------------------------------|-----------------------------------------------------|------------------------------------------------------|----------------|
| Name                                                                             | Conc.                  | (Unit)          | T <sub>0</sub> (°C)                          | 22.0            |                                                                                                                    | H <sub>2</sub>                             | O <sub>2</sub>                                           | N <sub>2</sub>                                           | Sum                                                 |                                                      |                |
| Pd-PVP                                                                           | 8.33                   | (mg/L)          | T (°C)                                       | 29.9            | Set                                                                                                                | 10.00                                      | 20.00                                                    | 20.00                                                    | 50.00                                               |                                                      |                |
|                                                                                  |                        |                 | P <sub>0</sub> (hPa)                         | 1005.2          | Calibrated                                                                                                         | 10.20                                      | 18.55                                                    | 19.86                                                    |                                                     |                                                      |                |
| H <sub>2</sub> SO <sub>4</sub>                                                   | 0.01                   | (N)             | P (hPa)                                      | 1012.5          | Determination of final [H <sub>2</sub> O <sub>2</sub> ]                                                            | Sample (g)                                 | Absorbance (—)                                           | [H <sub>2</sub> O <sub>2</sub> ] (mmol L <sup>-1</sup> ) |                                                     |                                                      |                |
| NaBr                                                                             | 0.001                  | (N)             | Agitation (rpm)                              | 1200            |                                                                                                                    |                                            |                                                          |                                                          | 0.958                                               | 0.774                                                | 27.73          |
| Comment:<br>Catalyst activation: H <sub>2</sub> gas 20 sccm at 303 K for 40 min. |                        |                 |                                              |                 | Analysis of H <sub>2</sub> O <sub>2</sub> formation selectivity and H <sub>2</sub> O <sub>2</sub> destruction rate |                                            |                                                          | S <sub>f</sub> (—)                                       | 0.8579                                              |                                                      |                |
|                                                                                  |                        |                 |                                              |                 |                                                                                                                    |                                            |                                                          | k <sub>d</sub> [Cat] (h <sup>-1</sup> )                  | 0.5291                                              |                                                      |                |
|                                                                                  |                        |                 |                                              |                 |                                                                                                                    |                                            |                                                          | R <sup>2</sup>                                           | 0.9995                                              |                                                      |                |
| GC calibration                                                                   |                        | GC count        |                                              |                 | Ratio of sensitivity (toward N <sub>2</sub> )                                                                      |                                            | Feed gas measurement                                     |                                                          |                                                     |                                                      |                |
| Timing                                                                           | No.                    | H <sub>2</sub>  | O <sub>2</sub>                               | N <sub>2</sub>  | H <sub>2</sub>                                                                                                     | O <sub>2</sub>                             |                                                          |                                                          |                                                     |                                                      |                |
| Before reaction                                                                  | 1                      | 964827          | 194744                                       | 171252          | 0.0911                                                                                                             | 0.0911                                     | 0.823                                                    | T <sub>a</sub> (°C)                                      | 22.6                                                |                                                      |                |
|                                                                                  | 2                      | 965037          | 194687                                       | 171494          | 0.0912                                                                                                             |                                            |                                                          | 0.823                                                    | P <sub>0</sub> (hPa)                                | 1005.0                                               |                |
|                                                                                  | 3                      | 965480          | 194643                                       | 171485          | 0.0912                                                                                                             |                                            |                                                          | 0.823                                                    | Flow (cc/min)                                       |                                                      |                |
| After reaction                                                                   | 4                      | 964401          | 193957                                       | 171086          | 0.0911                                                                                                             | 0.0911                                     | 0.823                                                    | H <sub>2</sub>                                           | 11.44                                               |                                                      |                |
|                                                                                  | 5                      | 964392          | 194047                                       | 171179          | 0.0911                                                                                                             |                                            |                                                          | 0.824                                                    | O <sub>2</sub>                                      | 20.81                                                |                |
|                                                                                  | 6                      | 964705          | 194069                                       | 171063          | 0.0910                                                                                                             |                                            |                                                          | 0.823                                                    | N <sub>2</sub>                                      | 22.28                                                |                |
| Time                                                                             |                        |                 |                                              | GC count        |                                                                                                                    |                                            | t <sub>correct</sub> (min)                               | Outlet flow (sccm)                                       |                                                     | Conversion(%)                                        |                |
| H                                                                                | M                      | S               | min.                                         | H <sub>2</sub>  | O <sub>2</sub>                                                                                                     | N <sub>2</sub>                             |                                                          | H <sub>2</sub>                                           | O <sub>2</sub>                                      | H <sub>2</sub>                                       | O <sub>2</sub> |
| 11                                                                               | 1                      | 32              | 4.0                                          | 490681          | 110798                                                                                                             | 269198                                     | 0.00                                                     | 7.75                                                     | 16.29                                               | 24.02                                                | 12.19          |
| 11                                                                               | 11                     | 34              | 14.0                                         | 762344          | 177997                                                                                                             | 191470                                     | 9.26                                                     | 7.69                                                     | 16.30                                               | 24.59                                                | 12.10          |
| 11                                                                               | 21                     | 38              | 24.1                                         | 776020          | 183873                                                                                                             | 185204                                     | 19.32                                                    | 7.62                                                     | 16.32                                               | 25.22                                                | 12.00          |
| 11                                                                               | 31                     | 40              | 34.1                                         | 771608          | 184708                                                                                                             | 184809                                     | 29.36                                                    | 7.56                                                     | 16.33                                               | 25.89                                                | 11.93          |
| 11                                                                               | 41                     | 44              | 44.2                                         | 766413          | 185093                                                                                                             | 184795                                     | 39.42                                                    | 7.51                                                     | 16.37                                               | 26.38                                                | 11.74          |
| 11                                                                               | 51                     | 46              | 54.2                                         | 759836          | 185414                                                                                                             | 185099                                     | 49.46                                                    | 7.43                                                     | 16.37                                               | 27.13                                                | 11.73          |
| 12                                                                               | 1                      | 50              | 64.3                                         | 752909          | 185650                                                                                                             | 185350                                     | 59.52                                                    | 7.35                                                     | 16.37                                               | 27.90                                                | 11.74          |
| 12                                                                               | 11                     | 52              | 74.3                                         | 745289          | 185930                                                                                                             | 186025                                     | 69.56                                                    | 7.25                                                     | 16.33                                               | 28.88                                                | 11.93          |
| 12                                                                               | 21                     | 56              | 84.4                                         | 738716          | 186166                                                                                                             | 185873                                     | 79.62                                                    | 7.19                                                     | 16.37                                               | 29.45                                                | 11.75          |
| 12                                                                               | 31                     | 58              | 94.4                                         | 733217          | 186481                                                                                                             | 186299                                     | 89.66                                                    | 7.12                                                     | 16.36                                               | 30.14                                                | 11.80          |
| 12                                                                               | 42                     | 2               | 104.5                                        | 727299          | 186869                                                                                                             | 186772                                     | 99.72                                                    | 7.05                                                     | 16.35                                               | 30.88                                                | 11.84          |
| 12                                                                               | 52                     | 4               | 114.5                                        | 722224          | 187136                                                                                                             | 187009                                     | 109.76                                                   | 6.99                                                     | 16.35                                               | 31.45                                                | 11.82          |
| 13                                                                               | 2                      | 8               | 124.6                                        | 717363          | 187425                                                                                                             | 187236                                     | 119.82                                                   | 6.93                                                     | 16.36                                               | 31.99                                                | 11.80          |
| t <sub>correct</sub> (min)                                                       | Partial pressure (kPa) |                 | Rate (mmol L <sup>-1</sup> h <sup>-1</sup> ) |                 | d[H <sub>2</sub> O <sub>2</sub> ]/dt (mmol L <sup>-1</sup> h <sup>-1</sup> )                                       | Σ[H <sub>2</sub> ] (mmol L <sup>-1</sup> ) | [H <sub>2</sub> O <sub>2</sub> ] (mmol L <sup>-1</sup> ) | S <sub>e</sub> (—)                                       | Σ <sub>2</sub> [H <sub>2</sub> O <sub>2</sub> ] (h) | Σ <sub>1</sub> /[H <sub>2</sub> O <sub>2</sub> ] (—) |                |
|                                                                                  | P <sub>H2</sub>        | P <sub>O2</sub> | r <sub>H2</sub>                              | r <sub>O2</sub> |                                                                                                                    |                                            |                                                          |                                                          |                                                     |                                                      |                |
| 0.00                                                                             | 17.13                  | 36.00           | 21.86                                        | 20.19           | 18.52                                                                                                              | 0.00                                       | 0.00                                                     |                                                          | 0.000                                               | 0.000                                                |                |
| 9.26                                                                             | 17.01                  | 36.07           | 22.39                                        | 20.04           | 17.69                                                                                                              | 3.41                                       | 2.79                                                     | 0.82                                                     | 0.077                                               | 1.222                                                |                |
| 19.32                                                                            | 16.89                  | 36.15           | 22.96                                        | 19.87           | 16.79                                                                                                              | 7.22                                       | 5.68                                                     | 0.79                                                     | 0.163                                               | 1.270                                                |                |
| 29.36                                                                            | 16.76                  | 36.23           | 23.57                                        | 19.76           | 15.95                                                                                                              | 11.11                                      | 8.42                                                     | 0.76                                                     | 0.250                                               | 1.319                                                |                |
| 39.42                                                                            | 16.65                  | 36.32           | 24.02                                        | 19.45           | 14.87                                                                                                              | 15.10                                      | 11.01                                                    | 0.73                                                     | 0.339                                               | 1.372                                                |                |
| 49.46                                                                            | 16.51                  | 36.38           | 24.70                                        | 19.43           | 14.16                                                                                                              | 19.17                                      | 13.44                                                    | 0.70                                                     | 0.430                                               | 1.427                                                |                |
| 59.52                                                                            | 16.37                  | 36.44           | 25.40                                        | 19.44           | 13.49                                                                                                              | 23.38                                      | 15.76                                                    | 0.67                                                     | 0.522                                               | 1.484                                                |                |
| 69.56                                                                            | 16.19                  | 36.48           | 26.30                                        | 19.75           | 13.21                                                                                                              | 27.70                                      | 17.99                                                    | 0.65                                                     | 0.614                                               | 1.540                                                |                |
| 79.62                                                                            | 16.07                  | 36.57           | 26.81                                        | 19.45           | 12.09                                                                                                              | 32.15                                      | 20.11                                                    | 0.63                                                     | 0.708                                               | 1.599                                                |                |
| 89.66                                                                            | 15.95                  | 36.62           | 27.44                                        | 19.54           | 11.64                                                                                                              | 36.69                                      | 22.10                                                    | 0.60                                                     | 0.804                                               | 1.660                                                |                |
| 99.72                                                                            | 15.81                  | 36.67           | 28.11                                        | 19.60           | 11.10                                                                                                              | 41.35                                      | 24.00                                                    | 0.58                                                     | 0.902                                               | 1.723                                                |                |
| 109.76                                                                           | 15.70                  | 36.72           | 28.63                                        | 19.58           | 10.53                                                                                                              | 46.09                                      | 25.81                                                    | 0.56                                                     | 1.000                                               | 1.786                                                |                |
| 119.82                                                                           | 15.59                  | 36.78           | 29.12                                        | 19.53           | 9.94                                                                                                               | 50.94                                      | 27.53                                                    | 0.54                                                     | 1.100                                               | 1.850                                                |                |

## H<sub>2</sub>O<sub>2</sub> Synthesis Data Sheet

Entry No. 2 (Exp. Y146) Employed in: Table. 1

| Catalyst, Additives                                                              |                        |                 | Reaction conditions                          |                 | Gas feed rate (sccm)                                                                                               |                                            |                                                          |                                                          |                                                     |                                                      |                |
|----------------------------------------------------------------------------------|------------------------|-----------------|----------------------------------------------|-----------------|--------------------------------------------------------------------------------------------------------------------|--------------------------------------------|----------------------------------------------------------|----------------------------------------------------------|-----------------------------------------------------|------------------------------------------------------|----------------|
| Name                                                                             | Conc.                  | (Unit)          | T <sub>0</sub> (°C)                          | 23.4            |                                                                                                                    | H <sub>2</sub>                             | O <sub>2</sub>                                           | N <sub>2</sub>                                           | Sum                                                 |                                                      |                |
| Pd-PVP                                                                           | 8.33                   | (mg/L)          | T (°C)                                       | 29.9            | Set                                                                                                                | 10.00                                      | 20.00                                                    | 20.00                                                    | 50.00                                               |                                                      |                |
| RuCl <sub>3</sub>                                                                | 0.0883                 | (mg-Ru/L)       | P <sub>0</sub> (hPa)                         | 1009.0          | Calibrated                                                                                                         | 10.12                                      | 18.55                                                    | 19.86                                                    | 48.53                                               |                                                      |                |
| H <sub>2</sub> SO <sub>4</sub>                                                   | 0.01                   | (N)             | P (hPa)                                      | 1016.3          | Determination of final [H <sub>2</sub> O <sub>2</sub> ]                                                            | Sample (g)                                 | Absorbance (—)                                           | [H <sub>2</sub> O <sub>2</sub> ] (mmol L <sup>-1</sup> ) |                                                     |                                                      |                |
| NaBr                                                                             | 0.001                  | (N)             | Agitation (rpm)                              | 1201            |                                                                                                                    |                                            |                                                          |                                                          | 0.680                                               | 0.499                                                | 24.77          |
| Comment:<br>Catalyst activation: H <sub>2</sub> gas 20 sccm at 303 K for 40 min. |                        |                 |                                              |                 | Analysis of H <sub>2</sub> O <sub>2</sub> formation selectivity and H <sub>2</sub> O <sub>2</sub> destruction rate |                                            |                                                          | S <sub>f</sub> (—)                                       | 0.7622                                              |                                                      |                |
|                                                                                  |                        |                 |                                              |                 |                                                                                                                    |                                            |                                                          | k <sub>d</sub> [Cat] (h <sup>-1</sup> )                  | 0.5778                                              |                                                      |                |
|                                                                                  |                        |                 |                                              |                 |                                                                                                                    |                                            |                                                          | R <sup>2</sup>                                           | 1.0000                                              |                                                      |                |
| GC calibration                                                                   |                        | GC count        |                                              |                 | Ratio of sensitivity (toward N <sub>2</sub> )                                                                      |                                            | Feed gas measurement                                     |                                                          |                                                     |                                                      |                |
| Timing                                                                           | No.                    | H <sub>2</sub>  | O <sub>2</sub>                               | N <sub>2</sub>  | H <sub>2</sub>                                                                                                     | O <sub>2</sub>                             |                                                          |                                                          |                                                     |                                                      |                |
| Before reaction                                                                  | 1                      | 993585          | 199939                                       | 172952          | 0.0887                                                                                                             | 0.0883                                     | 0.808                                                    | T <sub>a</sub> (°C)                                      | 23.4                                                |                                                      |                |
|                                                                                  | 2                      | 992977          | 199871                                       | 172998          | 0.0888                                                                                                             |                                            |                                                          | 0.808                                                    | P <sub>0</sub> (hPa)                                | 1008.2                                               |                |
|                                                                                  | 3                      | 993084          | 199849                                       | 172923          | 0.0887                                                                                                             |                                            |                                                          | 0.808                                                    | Flow (cc/min)                                       |                                                      |                |
| After reaction                                                                   | 4                      | 994104          | 199826                                       | 172955          | 0.0886                                                                                                             | 0.0808                                     | 0.808                                                    | H <sub>2</sub>                                           | 11.36                                               |                                                      |                |
|                                                                                  | 5                      | 993947          | 199885                                       | 173029          | 0.0887                                                                                                             |                                            |                                                          | 0.809                                                    | O <sub>2</sub>                                      | 20.83                                                |                |
|                                                                                  | 6                      | 1014427         | 198796                                       | 172016          | 0.0864                                                                                                             |                                            |                                                          | 0.808                                                    | N <sub>2</sub>                                      | 22.30                                                |                |
| Time                                                                             |                        |                 |                                              | GC count        |                                                                                                                    |                                            | t <sub>correct</sub> (min)                               | Outlet flow (sccm)                                       |                                                     | Conversion(%)                                        |                |
| H                                                                                | M                      | S               | min.                                         | H <sub>2</sub>  | O <sub>2</sub>                                                                                                     | N <sub>2</sub>                             |                                                          | H <sub>2</sub>                                           | O <sub>2</sub>                                      | H <sub>2</sub>                                       | O <sub>2</sub> |
| 15                                                                               | 39                     | 8               | 4.0                                          | 545593          | 118963                                                                                                             | 268077                                     | 0.00                                                     | 7.83                                                     | 16.54                                               | 22.57                                                | 10.82          |
| 15                                                                               | 49                     | 12              | 14.1                                         | 796646          | 185604                                                                                                             | 191542                                     | 9.53                                                     | 7.73                                                     | 16.52                                               | 23.61                                                | 10.93          |
| 15                                                                               | 59                     | 14              | 24.1                                         | 805918          | 190683                                                                                                             | 186420                                     | 19.57                                                    | 7.62                                                     | 16.50                                               | 24.71                                                | 11.04          |
| 16                                                                               | 9                      | 18              | 34.2                                         | 798774          | 191534                                                                                                             | 186595                                     | 29.63                                                    | 7.51                                                     | 16.48                                               | 25.80                                                | 11.17          |
| 16                                                                               | 19                     | 20              | 44.2                                         | 788417          | 191683                                                                                                             | 186917                                     | 39.67                                                    | 7.40                                                     | 16.46                                               | 26.88                                                | 11.26          |
| 16                                                                               | 29                     | 24              | 54.3                                         | 779440          | 192004                                                                                                             | 187538                                     | 49.73                                                    | 7.29                                                     | 16.44                                               | 27.96                                                | 11.40          |
| 16                                                                               | 39                     | 26              | 64.3                                         | 770892          | 192271                                                                                                             | 188090                                     | 59.77                                                    | 7.19                                                     | 16.41                                               | 28.96                                                | 11.54          |
| 16                                                                               | 49                     | 30              | 74.4                                         | 761810          | 192413                                                                                                             | 188490                                     | 69.83                                                    | 7.09                                                     | 16.39                                               | 29.94                                                | 11.66          |
| 16                                                                               | 59                     | 32              | 84.4                                         | 754472          | 192770                                                                                                             | 189037                                     | 79.87                                                    | 7.00                                                     | 16.37                                               | 30.82                                                | 11.75          |
| 17                                                                               | 9                      | 36              | 94.5                                         | 746987          | 192967                                                                                                             | 189353                                     | 89.93                                                    | 6.92                                                     | 16.36                                               | 31.62                                                | 11.81          |
| 17                                                                               | 19                     | 38              | 104.5                                        | 740593          | 193159                                                                                                             | 189625                                     | 99.97                                                    | 6.85                                                     | 16.35                                               | 32.30                                                | 11.85          |
| 17                                                                               | 29                     | 42              | 114.6                                        | 735205          | 193524                                                                                                             | 190030                                     | 110.03                                                   | 6.78                                                     | 16.35                                               | 32.94                                                | 11.87          |
| 17                                                                               | 39                     | 44              | 124.6                                        | 730828          | 193647                                                                                                             | 190120                                     | 120.07                                                   | 6.74                                                     | 16.35                                               | 33.37                                                | 11.86          |
| t <sub>correct</sub> (min)                                                       | Partial pressure (kPa) |                 | Rate (mmol L <sup>-1</sup> h <sup>-1</sup> ) |                 | d[H <sub>2</sub> O <sub>2</sub> ]/dt (mmol L <sup>-1</sup> h <sup>-1</sup> )                                       | Σ[H <sub>2</sub> ] (mmol L <sup>-1</sup> ) | [H <sub>2</sub> O <sub>2</sub> ] (mmol L <sup>-1</sup> ) | S <sub>e</sub> (—)                                       | Σ <sub>2</sub> [H <sub>2</sub> O <sub>2</sub> ] (h) | Σ <sub>1</sub> /[H <sub>2</sub> O <sub>2</sub> ] (—) |                |
|                                                                                  | P <sub>H2</sub>        | P <sub>O2</sub> | r <sub>H2</sub>                              | r <sub>O2</sub> |                                                                                                                    |                                            |                                                          |                                                          |                                                     |                                                      |                |
| 0.00                                                                             | 17.25                  | 36.43           | 20.38                                        | 17.92           | 15.45                                                                                                              | 0.00                                       | 0.00                                                     |                                                          | 0.000                                               | 0.000                                                |                |
| 9.53                                                                             | 17.07                  | 36.49           | 21.33                                        | 18.10           | 14.87                                                                                                              | 3.31                                       | 2.41                                                     | 0.73                                                     | 0.079                                               | 1.376                                                |                |
| 19.57                                                                            | 16.87                  | 36.55           | 22.32                                        | 18.29           | 14.27                                                                                                              | 6.96                                       | 4.85                                                     | 0.70                                                     | 0.165                                               | 1.437                                                |                |
| 29.63                                                                            | 16.68                  | 36.61           | 23.30                                        | 18.50           | 13.70                                                                                                              | 10.79                                      | 7.19                                                     | 0.67                                                     | 0.251                                               | 1.500                                                |                |
| 39.67                                                                            | 16.48                  | 36.68           | 24.28                                        | 18.64           | 13.00                                                                                                              | 14.77                                      | 9.42                                                     | 0.64                                                     | 0.339                                               | 1.567                                                |                |
| 49.73                                                                            | 16.29                  | 36.73           | 25.25                                        | 18.88           | 12.51                                                                                                              | 18.92                                      | 11.56                                                    | 0.61                                                     | 0.429                                               | 1.636                                                |                |
| 59.77                                                                            | 16.11                  | 36.78           | 26.15                                        | 19.11           | 12.07                                                                                                              | 23.22                                      | 13.62                                                    | 0.59                                                     | 0.519                                               | 1.705                                                |                |
| 69.83                                                                            | 15.93                  | 36.83           | 27.05                                        | 19.31           | 11.58                                                                                                              | 27.69                                      | 15.60                                                    | 0.56                                                     | 0.610                                               | 1.774                                                |                |
| 79.87                                                                            | 15.77                  | 36.88           | 27.84                                        | 19.47           | 11.10                                                                                                              | 32.27                                      | 17.50                                                    | 0.54                                                     | 0.702                                               | 1.844                                                |                |
| 89.93                                                                            | 15.62                  | 36.94           | 28.56                                        | 19.56           | 10.56                                                                                                              | 37.00                                      | 19.32                                                    | 0.52                                                     | 0.796                                               | 1.916                                                |                |
| 99.97                                                                            | 15.49                  | 36.98           | 29.18                                        | 19.62           | 10.07                                                                                                              | 41.83                                      | 21.04                                                    | 0.50                                                     | 0.891                                               | 1.988                                                |                |
| 110.03                                                                           | 15.37                  | 37.03           | 29.75                                        | 19.66           | 9.57                                                                                                               | 46.78                                      | 22.69                                                    | 0.49                                                     | 0.988                                               | 2.062                                                |                |
| 120.07                                                                           | 15.28                  | 37.07           | 30.14                                        | 19.64           | 9.13                                                                                                               | 51.78                                      | 24.25                                                    | 0.47                                                     | 1.086                                               | 2.135                                                |                |

## H<sub>2</sub>O<sub>2</sub> Synthesis Data Sheet

Entry No. 3 (Exp. Y145) Employed in: Table. 1

| Catalyst, Additives                                                              |                        |                 | Reaction conditions                          |                 | Gas feed rate (sccm)                                                                                               |                                            |                                                          |                                                          |                                                     |                                                      |                |
|----------------------------------------------------------------------------------|------------------------|-----------------|----------------------------------------------|-----------------|--------------------------------------------------------------------------------------------------------------------|--------------------------------------------|----------------------------------------------------------|----------------------------------------------------------|-----------------------------------------------------|------------------------------------------------------|----------------|
| Name                                                                             | Conc.                  | (Unit)          | T <sub>0</sub> (°C)                          | 22.7            |                                                                                                                    | H <sub>2</sub>                             | O <sub>2</sub>                                           | N <sub>2</sub>                                           | Sum                                                 |                                                      |                |
| Pd-PVP                                                                           | 8.33                   | (mg/L)          | T (°C)                                       | 29.9            | Set                                                                                                                | 10.00                                      | 20.00                                                    | 20.00                                                    | 50.00                                               |                                                      |                |
| RhCl <sub>3</sub>                                                                | 0.04                   | (mg-Rh/L)       | P <sub>0</sub> (hPa)                         | 1008.8          | Calibrated                                                                                                         | 10.12                                      | 18.55                                                    | 19.86                                                    | 48.53                                               |                                                      |                |
| H <sub>2</sub> SO <sub>4</sub>                                                   | 0.01                   | (N)             | P (hPa)                                      | 1016.1          | Determination of final [H <sub>2</sub> O <sub>2</sub> ]                                                            | Sample (g)                                 | Absorbance (—)                                           | [H <sub>2</sub> O <sub>2</sub> ] (mmol L <sup>-1</sup> ) |                                                     |                                                      |                |
| NaBr                                                                             | 0.001                  | (N)             | Agitation (rpm)                              | 1202            |                                                                                                                    |                                            |                                                          |                                                          | 0.591                                               | 0.487                                                | 27.82          |
| Comment:<br>Catalyst activation: H <sub>2</sub> gas 20 sccm at 303 K for 40 min. |                        |                 |                                              |                 | Analysis of H <sub>2</sub> O <sub>2</sub> formation selectivity and H <sub>2</sub> O <sub>2</sub> destruction rate |                                            |                                                          | S <sub>f</sub> (—)                                       | 0.7680                                              |                                                      |                |
|                                                                                  |                        |                 |                                              |                 |                                                                                                                    |                                            |                                                          | k <sub>d</sub> [Cat] (h <sup>-1</sup> )                  | 0.4663                                              |                                                      |                |
|                                                                                  |                        |                 |                                              |                 |                                                                                                                    |                                            |                                                          | R <sup>2</sup>                                           | 0.9999                                              |                                                      |                |
| GC calibration                                                                   |                        | GC count        |                                              |                 | Ratio of sensitivity (toward N <sub>2</sub> )                                                                      |                                            | Feed gas measurement                                     |                                                          |                                                     |                                                      |                |
| Timing                                                                           | No.                    | H <sub>2</sub>  | O <sub>2</sub>                               | N <sub>2</sub>  | H <sub>2</sub>                                                                                                     | O <sub>2</sub>                             |                                                          |                                                          |                                                     |                                                      |                |
| Before reaction                                                                  | 1                      | 994795          | 200757                                       | 173863          | 0.0890                                                                                                             | 0.0889                                     | 0.809                                                    | T <sub>a</sub> (°C)                                      | 23.4                                                |                                                      |                |
|                                                                                  | 2                      | 994418          | 200311                                       | 173458          | 0.0889                                                                                                             |                                            |                                                          | 0.809                                                    | P <sub>0</sub> (hPa)                                | 1008.2                                               |                |
|                                                                                  | 3                      | 991865          | 200349                                       | 173759          | 0.0892                                                                                                             |                                            |                                                          | 0.810                                                    | Flow (cc/min)                                       |                                                      |                |
| After reaction                                                                   | 4                      | 995495          | 200356                                       | 173443          | 0.0888                                                                                                             |                                            |                                                          | 0.809                                                    | H <sub>2</sub>                                      | 11.36                                                |                |
|                                                                                  | 5                      | 995137          | 200202                                       | 173151          | 0.0886                                                                                                             |                                            |                                                          | 0.808                                                    | O <sub>2</sub>                                      | 20.83                                                |                |
|                                                                                  | 6                      | 994006          | 199904                                       | 172997          | 0.0887                                                                                                             |                                            |                                                          | 0.808                                                    | N <sub>2</sub>                                      | 22.30                                                |                |
| Time                                                                             |                        |                 |                                              | GC count        |                                                                                                                    |                                            | t <sub>correct</sub> (min)                               | Outlet flow (sccm)                                       |                                                     | Conversion(%)                                        |                |
| H                                                                                | M                      | S               | min.                                         | H <sub>2</sub>  | O <sub>2</sub>                                                                                                     | N <sub>2</sub>                             |                                                          | H <sub>2</sub>                                           | O <sub>2</sub>                                      | H <sub>2</sub>                                       | O <sub>2</sub> |
| 11                                                                               | 55                     | 58              | 4.0                                          | 531572          | 118135                                                                                                             | 271544                                     | 0.00                                                     | 7.31                                                     | 16.07                                               | 27.78                                                | 13.35          |
| 12                                                                               | 6                      | 2               | 14.1                                         | 768666          | 185329                                                                                                             | 196057                                     | 9.68                                                     | 7.25                                                     | 16.10                                               | 28.29                                                | 13.22          |
| 12                                                                               | 16                     | 4               | 24.1                                         | 776263          | 190918                                                                                                             | 191064                                     | 19.72                                                    | 7.20                                                     | 16.12                                               | 28.83                                                | 13.08          |
| 12                                                                               | 26                     | 8               | 34.2                                         | 770465          | 191325                                                                                                             | 190325                                     | 29.78                                                    | 7.14                                                     | 16.15                                               | 29.38                                                | 12.96          |
| 12                                                                               | 36                     | 10              | 44.2                                         | 764913          | 191590                                                                                                             | 190226                                     | 39.82                                                    | 7.10                                                     | 16.18                                               | 29.86                                                | 12.79          |
| 12                                                                               | 46                     | 14              | 54.3                                         | 759907          | 192189                                                                                                             | 190592                                     | 49.88                                                    | 7.04                                                     | 16.20                                               | 30.45                                                | 12.69          |
| 12                                                                               | 56                     | 16              | 64.3                                         | 753159          | 192260                                                                                                             | 190588                                     | 59.92                                                    | 6.97                                                     | 16.20                                               | 31.06                                                | 12.65          |
| 13                                                                               | 6                      | 18              | 74.3                                         | 748348          | 192729                                                                                                             | 190928                                     | 69.95                                                    | 6.92                                                     | 16.21                                               | 31.63                                                | 12.60          |
| 13                                                                               | 16                     | 22              | 84.4                                         | 743569          | 192968                                                                                                             | 191067                                     | 80.02                                                    | 6.87                                                     | 16.22                                               | 32.11                                                | 12.55          |
| 13                                                                               | 26                     | 24              | 94.4                                         | 739201          | 193301                                                                                                             | 191204                                     | 90.05                                                    | 6.82                                                     | 16.24                                               | 32.56                                                | 12.46          |
| 13                                                                               | 36                     | 28              | 104.5                                        | 735128          | 193456                                                                                                             | 191215                                     | 100.12                                                   | 6.78                                                     | 16.25                                               | 32.94                                                | 12.40          |
| 13                                                                               | 46                     | 30              | 114.5                                        | 732130          | 193637                                                                                                             | 191239                                     | 110.15                                                   | 6.76                                                     | 16.26                                               | 33.22                                                | 12.33          |
| 13                                                                               | 56                     | 34              | 124.6                                        | 729668          | 194230                                                                                                             | 191570                                     | 120.22                                                   | 6.72                                                     | 16.29                                               | 33.56                                                | 12.21          |
| t <sub>correct</sub> (min)                                                       | Partial pressure (kPa) |                 | Rate (mmol L <sup>-1</sup> h <sup>-1</sup> ) |                 | d[H <sub>2</sub> O <sub>2</sub> ]/dt (mmol L <sup>-1</sup> h <sup>-1</sup> )                                       | Σ[H <sub>2</sub> ] (mmol L <sup>-1</sup> ) | [H <sub>2</sub> O <sub>2</sub> ] (mmol L <sup>-1</sup> ) | S <sub>e</sub> (—)                                       | Σ <sub>2</sub> [H <sub>2</sub> O <sub>2</sub> ] (h) | Σ <sub>1</sub> /[H <sub>2</sub> O <sub>2</sub> ] (—) |                |
|                                                                                  | P <sub>H2</sub>        | P <sub>O2</sub> | r <sub>H2</sub>                              | r <sub>O2</sub> |                                                                                                                    |                                            |                                                          |                                                          |                                                     |                                                      |                |
| 0.00                                                                             | 16.45                  | 36.20           | 25.09                                        | 22.11           | 19.13                                                                                                              | 0.00                                       | 0.00                                                     |                                                          | 0.000                                               | 0.000                                                |                |
| 9.68                                                                             | 16.35                  | 36.28           | 25.56                                        | 21.89           | 18.23                                                                                                              | 4.09                                       | 3.01                                                     | 0.74                                                     | 0.081                                               | 1.356                                                |                |
| 19.72                                                                            | 16.24                  | 36.36           | 26.04                                        | 21.67           | 17.30                                                                                                              | 8.40                                       | 5.99                                                     | 0.71                                                     | 0.166                                               | 1.404                                                |                |
| 29.78                                                                            | 16.12                  | 36.44           | 26.54                                        | 21.46           | 16.38                                                                                                              | 12.81                                      | 8.81                                                     | 0.69                                                     | 0.254                                               | 1.454                                                |                |
| 39.82                                                                            | 16.02                  | 36.52           | 26.97                                        | 21.19           | 15.41                                                                                                              | 17.29                                      | 11.47                                                    | 0.66                                                     | 0.343                                               | 1.507                                                |                |
| 49.88                                                                            | 15.90                  | 36.60           | 27.50                                        | 21.01           | 14.52                                                                                                              | 21.86                                      | 13.98                                                    | 0.64                                                     | 0.434                                               | 1.563                                                |                |
| 59.92                                                                            | 15.78                  | 36.66           | 28.06                                        | 20.96           | 13.86                                                                                                              | 26.50                                      | 16.35                                                    | 0.62                                                     | 0.526                                               | 1.621                                                |                |
| 69.95                                                                            | 15.67                  | 36.72           | 28.57                                        | 20.86           | 13.16                                                                                                              | 31.24                                      | 18.61                                                    | 0.60                                                     | 0.619                                               | 1.678                                                |                |
| 80.02                                                                            | 15.57                  | 36.78           | 29.01                                        | 20.79           | 12.57                                                                                                              | 36.07                                      | 20.77                                                    | 0.58                                                     | 0.714                                               | 1.736                                                |                |
| 90.05                                                                            | 15.48                  | 36.84           | 29.41                                        | 20.64           | 11.87                                                                                                              | 40.95                                      | 22.81                                                    | 0.56                                                     | 0.810                                               | 1.795                                                |                |
| 100.12                                                                           | 15.40                  | 36.89           | 29.75                                        | 20.53           | 11.32                                                                                                              | 45.91                                      | 24.76                                                    | 0.54                                                     | 0.907                                               | 1.854                                                |                |
| 110.15                                                                           | 15.34                  | 36.93           | 30.00                                        | 20.42           | 10.83                                                                                                              | 50.91                                      | 26.61                                                    | 0.52                                                     | 1.006                                               | 1.913                                                |                |
| 120.22                                                                           | 15.27                  | 36.99           | 30.31                                        | 20.22           | 10.14                                                                                                              | 55.97                                      | 28.37                                                    | 0.51                                                     | 1.106                                               | 1.973                                                |                |

## H<sub>2</sub>O<sub>2</sub> Synthesis Data Sheet

Entry No. 4 (Exp. Y151) Employed in: Table. 1 Fig. 3 Fig. 10 Fig. 11

| Catalyst, Additives                                                              |                        |                 | Reaction conditions                          |                 | Gas feed rate (sccm)                                                                                               |                                            |                                                          |                                                          |                                                     |                                                      |       |
|----------------------------------------------------------------------------------|------------------------|-----------------|----------------------------------------------|-----------------|--------------------------------------------------------------------------------------------------------------------|--------------------------------------------|----------------------------------------------------------|----------------------------------------------------------|-----------------------------------------------------|------------------------------------------------------|-------|
| Name                                                                             | Conc.                  | (Unit)          | T <sub>0</sub> (°C)                          | 25.1            |                                                                                                                    | H <sub>2</sub>                             | O <sub>2</sub>                                           | N <sub>2</sub>                                           | Sum                                                 |                                                      |       |
| Pd-PVP                                                                           | 8.33                   | (mg/L)          | T (°C)                                       | 30.0            | Set                                                                                                                | 14.00                                      | 20.00                                                    | 20.00                                                    | 54.00                                               |                                                      |       |
| IrCl <sub>3</sub>                                                                | 0.08667                | (mg-Ir/L)       | P <sub>0</sub> (hPa)                         | 1012.8          | Calibrated                                                                                                         | 14.06                                      | 18.56                                                    | 19.89                                                    | 52.51                                               |                                                      |       |
| H <sub>2</sub> SO <sub>4</sub>                                                   | 0.01                   | (N)             | P (hPa)                                      | 1019.5          | Determination of final [H <sub>2</sub> O <sub>2</sub> ]                                                            | Sample (g)                                 | Absorbance (—)                                           | [H <sub>2</sub> O <sub>2</sub> ] (mmol L <sup>-1</sup> ) |                                                     |                                                      |       |
| NaBr                                                                             | 0.001                  | (N)             | Agitation (rpm)                              | 1198            |                                                                                                                    |                                            |                                                          |                                                          | 0.515                                               | 0.836                                                | 54.72 |
| Comment:<br>Catalyst activation: H <sub>2</sub> gas 20 sccm at 303 K for 40 min. |                        |                 |                                              |                 | Analysis of H <sub>2</sub> O <sub>2</sub> formation selectivity and H <sub>2</sub> O <sub>2</sub> destruction rate |                                            |                                                          | S <sub>f</sub> (—)                                       | 0.5506                                              |                                                      |       |
|                                                                                  |                        |                 |                                              |                 |                                                                                                                    |                                            |                                                          | k <sub>d</sub> [Cat] (h <sup>-1</sup> )                  | 0.3507                                              |                                                      |       |
|                                                                                  |                        |                 |                                              |                 |                                                                                                                    |                                            |                                                          | R <sup>2</sup>                                           | 0.9997                                              |                                                      |       |
| GC calibration                                                                   |                        | GC count        |                                              |                 | Ratio of sensitivity (toward N <sub>2</sub> )                                                                      |                                            | Feed gas measurement                                     |                                                          |                                                     |                                                      |       |
| Timing                                                                           | No.                    | H <sub>2</sub>  | O <sub>2</sub>                               | N <sub>2</sub>  | H <sub>2</sub>                                                                                                     | O <sub>2</sub>                             |                                                          |                                                          |                                                     |                                                      |       |
| Before reaction                                                                  | 1                      | 1261831         | 185394                                       | 160432          | 0.0899                                                                                                             | 0.0897                                     | 0.807                                                    | T <sub>a</sub> (°C)                                      | 24.8                                                |                                                      |       |
|                                                                                  | 2                      | 1261906         | 185313                                       | 160326          | 0.0898                                                                                                             |                                            |                                                          | 0.807                                                    | P <sub>0</sub> (hPa)                                | 1013.0                                               |       |
|                                                                                  | 3                      | 1262159         | 185208                                       | 160190          | 0.0897                                                                                                             |                                            |                                                          | 0.807                                                    | Flow (cc/min)                                       |                                                      |       |
| After reaction                                                                   | 4                      | 1262024         | 184777                                       | 159782          | 0.0895                                                                                                             |                                            |                                                          | 0.807                                                    | H <sub>2</sub>                                      | 15.83                                                |       |
|                                                                                  | 5                      | 1262965         | 184802                                       | 159882          | 0.0895                                                                                                             |                                            |                                                          | 0.807                                                    | O <sub>2</sub>                                      | 20.89                                                |       |
|                                                                                  | 6                      | 1263508         | 185014                                       | 160043          | 0.0896                                                                                                             |                                            |                                                          | 0.807                                                    | N <sub>2</sub>                                      | 22.39                                                |       |
| Time                                                                             |                        | GC count        |                                              |                 | t <sub>correct</sub> (min)                                                                                         | Outlet flow (sccm)                         |                                                          | Conversion(%)                                            |                                                     |                                                      |       |
| H                                                                                | M                      | S               | min.                                         | H <sub>2</sub>  |                                                                                                                    | O <sub>2</sub>                             | N <sub>2</sub>                                           | H <sub>2</sub>                                           | O <sub>2</sub>                                      |                                                      |       |
| 16                                                                               | 28                     | 56              | 4.0                                          | 610155          | 105352                                                                                                             | 273270                                     | 0.00                                                     | 6.18                                                     | 12.45                                               | 56.04                                                | 32.90 |
| 16                                                                               | 38                     | 58              | 14.0                                         | 742639          | 159704                                                                                                             | 217092                                     | 10.87                                                    | 6.15                                                     | 12.55                                               | 56.24                                                | 32.35 |
| 16                                                                               | 49                     | 2               | 24.1                                         | 732488          | 166040                                                                                                             | 212200                                     | 20.94                                                    | 6.13                                                     | 12.65                                               | 56.44                                                | 31.84 |
| 16                                                                               | 59                     | 4               | 34.1                                         | 722380          | 167585                                                                                                             | 211190                                     | 30.97                                                    | 6.10                                                     | 12.74                                               | 56.62                                                | 31.36 |
| 17                                                                               | 9                      | 8               | 44.2                                         | 715304          | 168282                                                                                                             | 210255                                     | 41.04                                                    | 6.07                                                     | 12.85                                               | 56.85                                                | 30.76 |
| 17                                                                               | 19                     | 10              | 54.2                                         | 710916          | 168918                                                                                                             | 209720                                     | 51.07                                                    | 6.05                                                     | 12.93                                               | 57.01                                                | 30.32 |
| 17                                                                               | 29                     | 14              | 64.3                                         | 711485          | 169869                                                                                                             | 209550                                     | 61.14                                                    | 6.06                                                     | 13.01                                               | 56.94                                                | 29.88 |
| 17                                                                               | 39                     | 16              | 74.3                                         | 713281          | 170969                                                                                                             | 209261                                     | 71.17                                                    | 6.08                                                     | 13.12                                               | 56.77                                                | 29.32 |
| 17                                                                               | 49                     | 20              | 84.4                                         | 715143          | 171909                                                                                                             | 208735                                     | 81.24                                                    | 6.11                                                     | 13.22                                               | 56.55                                                | 28.76 |
| 17                                                                               | 59                     | 22              | 94.4                                         | 714510          | 171769                                                                                                             | 207316                                     | 91.27                                                    | 6.15                                                     | 13.30                                               | 56.29                                                | 28.33 |
| 18                                                                               | 9                      | 24              | 104.5                                        | 719003          | 173303                                                                                                             | 207627                                     | 101.30                                                   | 6.18                                                     | 13.40                                               | 56.08                                                | 27.79 |
| 18                                                                               | 19                     | 28              | 114.5                                        | 719836          | 173779                                                                                                             | 207024                                     | 111.37                                                   | 6.20                                                     | 13.48                                               | 55.90                                                | 27.39 |
| 18                                                                               | 29                     | 30              | 124.6                                        | 718815          | 173924                                                                                                             | 206077                                     | 121.40                                                   | 6.22                                                     | 13.55                                               | 55.76                                                | 26.99 |
| t <sub>correct</sub> (min)                                                       | Partial pressure (kPa) |                 | Rate (mmol L <sup>-1</sup> h <sup>-1</sup> ) |                 | d[H <sub>2</sub> O <sub>2</sub> ]/dt (mmol L <sup>-1</sup> h <sup>-1</sup> )                                       | Σ[H <sub>2</sub> ] (mmol L <sup>-1</sup> ) | [H <sub>2</sub> O <sub>2</sub> ] (mmol L <sup>-1</sup> ) | S <sub>e</sub> (—)                                       | Σ <sub>2</sub> [H <sub>2</sub> O <sub>2</sub> ] (h) | Σ <sub>1</sub> /[H <sub>2</sub> O <sub>2</sub> ] (—) |       |
|                                                                                  | P <sub>H2</sub>        | P <sub>O2</sub> | r <sub>H2</sub>                              | r <sub>O2</sub> |                                                                                                                    |                                            |                                                          |                                                          |                                                     |                                                      |       |
| 0.00                                                                             | 15.68                  | 31.57           | 70.36                                        | 54.53           | 38.69                                                                                                              | 0.00                                       | 0.00                                                     |                                                          | 0.000                                               | 0.000                                                |       |
| 10.87                                                                            | 15.57                  | 31.77           | 70.63                                        | 53.61           | 36.60                                                                                                              | 12.77                                      | 6.82                                                     | 0.53                                                     | 0.091                                               | 1.873                                                |       |
| 20.94                                                                            | 15.48                  | 31.96           | 70.87                                        | 52.76           | 34.66                                                                                                              | 24.64                                      | 12.80                                                    | 0.52                                                     | 0.177                                               | 1.925                                                |       |
| 30.97                                                                            | 15.39                  | 32.13           | 71.09                                        | 51.96           | 32.82                                                                                                              | 36.51                                      | 18.44                                                    | 0.51                                                     | 0.264                                               | 1.980                                                |       |
| 41.04                                                                            | 15.27                  | 32.34           | 71.39                                        | 50.98           | 30.57                                                                                                              | 48.46                                      | 23.76                                                    | 0.49                                                     | 0.354                                               | 2.040                                                |       |
| 51.07                                                                            | 15.20                  | 32.50           | 71.58                                        | 50.25           | 28.92                                                                                                              | 60.42                                      | 28.73                                                    | 0.48                                                     | 0.446                                               | 2.103                                                |       |
| 61.14                                                                            | 15.18                  | 32.63           | 71.50                                        | 49.51           | 27.51                                                                                                              | 72.42                                      | 33.46                                                    | 0.46                                                     | 0.539                                               | 2.164                                                |       |
| 71.17                                                                            | 15.20                  | 32.78           | 71.28                                        | 48.59           | 25.90                                                                                                              | 84.36                                      | 37.93                                                    | 0.45                                                     | 0.632                                               | 2.224                                                |       |
| 81.24                                                                            | 15.22                  | 32.93           | 71.01                                        | 47.65           | 24.30                                                                                                              | 96.29                                      | 42.14                                                    | 0.44                                                     | 0.729                                               | 2.285                                                |       |
| 91.27                                                                            | 15.27                  | 33.03           | 70.68                                        | 46.94           | 23.20                                                                                                              | 108.14                                     | 46.11                                                    | 0.43                                                     | 0.826                                               | 2.345                                                |       |
| 101.30                                                                           | 15.29                  | 33.17           | 70.42                                        | 46.06           | 21.70                                                                                                              | 119.94                                     | 49.86                                                    | 0.42                                                     | 0.925                                               | 2.405                                                |       |
| 111.37                                                                           | 15.31                  | 33.27           | 70.19                                        | 45.38           | 20.57                                                                                                              | 131.73                                     | 53.41                                                    | 0.41                                                     | 1.026                                               | 2.466                                                |       |
| 121.40                                                                           | 15.33                  | 33.38           | 70.02                                        | 44.73           | 19.43                                                                                                              | 143.46                                     | 56.75                                                    | 0.40                                                     | 1.127                                               | 2.528                                                |       |

## H<sub>2</sub>O<sub>2</sub> Synthesis Data Sheet

Entry No. 5 (Exp. G62) Employed in: Table. 1 Fig. 3 Fig. 6 Fig. 7 Fig. 8

| Catalyst, Additives                                                              |                        |                 | Reaction conditions                          |                 | Gas feed rate (sccm)                                                                                               |                                            |                                                          |                                                          |                                                     |                                                      |       |       |
|----------------------------------------------------------------------------------|------------------------|-----------------|----------------------------------------------|-----------------|--------------------------------------------------------------------------------------------------------------------|--------------------------------------------|----------------------------------------------------------|----------------------------------------------------------|-----------------------------------------------------|------------------------------------------------------|-------|-------|
| Name                                                                             | Conc.                  | (Unit)          | T <sub>0</sub> (°C)                          | 22.2            |                                                                                                                    | H <sub>2</sub>                             | O <sub>2</sub>                                           | N <sub>2</sub>                                           | Sum                                                 |                                                      |       |       |
| Pd-PVP                                                                           | 8.33                   | (mg/L)          | T (°C)                                       | 30.0            | Set                                                                                                                | 12.50                                      | 20.00                                                    | 20.00                                                    | 52.50                                               |                                                      |       |       |
| Pt(NH <sub>3</sub> ) <sub>4</sub> (NO <sub>3</sub> ) <sub>2</sub>                | 0.0833                 | (mg-Pt/L)       | P <sub>0</sub> (hPa)                         | 1011.5          | Calibrated                                                                                                         | 12.49                                      | 18.68                                                    | 20.06                                                    | 51.23                                               |                                                      |       |       |
| H <sub>2</sub> SO <sub>4</sub>                                                   | 0.01                   | (N)             | P (hPa)                                      | 1018.0          | Determination of final [H <sub>2</sub> O <sub>2</sub> ]                                                            | Sample (g)                                 | Absorbance (—)                                           | [H <sub>2</sub> O <sub>2</sub> ] (mmol L <sup>-1</sup> ) |                                                     |                                                      |       |       |
| NaBr                                                                             | 0.001                  | (N)             | Agitation (rpm)                              | 1199            |                                                                                                                    |                                            |                                                          |                                                          | 0.662                                               | 1.053                                                | 54.64 |       |
| Comment:<br>Catalyst activation: H <sub>2</sub> gas 20 sccm at 303 K for 40 min. |                        |                 |                                              |                 | Analysis of H <sub>2</sub> O <sub>2</sub> formation selectivity and H <sub>2</sub> O <sub>2</sub> destruction rate |                                            |                                                          | S <sub>f</sub> (—)                                       | 0.7458                                              |                                                      |       |       |
|                                                                                  |                        |                 |                                              |                 |                                                                                                                    |                                            |                                                          | k <sub>d</sub> [Cat] (h <sup>-1</sup> )                  | 0.5011                                              |                                                      |       |       |
|                                                                                  |                        |                 |                                              |                 |                                                                                                                    |                                            |                                                          | R <sup>2</sup>                                           | 0.9972                                              |                                                      |       |       |
| GC calibration                                                                   |                        | GC count        |                                              |                 | Ratio of sensitivity (toward N <sub>2</sub> )                                                                      |                                            | Feed gas measurement                                     |                                                          |                                                     |                                                      |       |       |
| Timing                                                                           | No.                    | H <sub>2</sub>  | O <sub>2</sub>                               | N <sub>2</sub>  | H <sub>2</sub>                                                                                                     | O <sub>2</sub>                             |                                                          |                                                          |                                                     |                                                      |       |       |
| Before reaction                                                                  | 1                      | 1128473         | 185518                                       | 161206          | 0.0890                                                                                                             | 0.0888                                     | 0.810                                                    | T <sub>a</sub> (°C)                                      | 21.4                                                |                                                      |       |       |
|                                                                                  | 2                      | 1129357         | 185655                                       | 161357          | 0.0890                                                                                                             |                                            |                                                          | 0.810                                                    | P <sub>0</sub> (hPa)                                | 1012.8                                               |       |       |
|                                                                                  | 3                      | 1129078         | 185333                                       | 161000          | 0.0888                                                                                                             |                                            |                                                          | 0.809                                                    | Flow (cc/min)                                       |                                                      |       |       |
| After reaction                                                                   | 4                      | 1128936         | 185063                                       | 160903          | 0.0888                                                                                                             |                                            |                                                          | 0.810                                                    | H <sub>2</sub>                                      | 13.82                                                |       |       |
|                                                                                  | 5                      | 1128595         | 184880                                       | 160584          | 0.0886                                                                                                             |                                            |                                                          | 0.809                                                    | O <sub>2</sub>                                      | 20.67                                                |       |       |
|                                                                                  | 6                      | 1130586         | 185401                                       | 161199          | 0.0888                                                                                                             |                                            |                                                          | 0.810                                                    | N <sub>2</sub>                                      | 22.19                                                |       |       |
| Time                                                                             |                        | GC count        |                                              |                 | t <sub>correct</sub> (min)                                                                                         | Outlet flow (sccm)                         |                                                          | Conversion(%)                                            |                                                     |                                                      |       |       |
| H                                                                                | M                      | S               | min.                                         | H <sub>2</sub>  |                                                                                                                    | O <sub>2</sub>                             | N <sub>2</sub>                                           | H <sub>2</sub>                                           | O <sub>2</sub>                                      |                                                      |       |       |
| 12                                                                               | 58                     | 8               | 4.0                                          | 520436          |                                                                                                                    | 104082                                     | 270431                                                   | 6.65                                                     | 13.63                                               | 46.75                                                | 27.05 |       |
| 13                                                                               | 8                      | 12              | 14.1                                         | 718722          |                                                                                                                    | 162260                                     | 205753                                                   | 9.84                                                     | 6.56                                                | 13.68                                                | 47.51 | 26.76 |
| 13                                                                               | 18                     | 14              | 24.1                                         | 720239          |                                                                                                                    | 168236                                     | 200274                                                   | 19.87                                                    | 6.46                                                | 13.74                                                | 48.29 | 26.47 |
| 13                                                                               | 28                     | 18              | 34.2                                         | 713149          |                                                                                                                    | 169671                                     | 199879                                                   | 29.94                                                    | 6.36                                                | 13.78                                                | 49.11 | 26.23 |
| 13                                                                               | 38                     | 20              | 44.2                                         | 704164          |                                                                                                                    | 170510                                     | 199736                                                   | 39.97                                                    | 6.28                                                | 13.86                                                | 49.72 | 25.81 |
| 13                                                                               | 48                     | 24              | 54.3                                         | 691782          |                                                                                                                    | 171042                                     | 199936                                                   | 50.04                                                    | 6.16                                                | 13.89                                                | 50.65 | 25.65 |
| 13                                                                               | 58                     | 26              | 64.3                                         | 675871          |                                                                                                                    | 171563                                     | 200560                                                   | 60.07                                                    | 6.00                                                | 13.89                                                | 51.94 | 25.66 |
| 14                                                                               | 8                      | 30              | 74.4                                         | 606121          |                                                                                                                    | 172076                                     | 206151                                                   | 70.14                                                    | 5.24                                                | 13.55                                                | 58.07 | 27.46 |
| 14                                                                               | 18                     | 32              | 84.4                                         | 593111          |                                                                                                                    | 172791                                     | 207203                                                   | 80.17                                                    | 5.10                                                | 13.54                                                | 59.18 | 27.53 |
| 14                                                                               | 28                     | 34              | 94.4                                         | 594309          |                                                                                                                    | 173106                                     | 206749                                                   | 90.20                                                    | 5.12                                                | 13.59                                                | 59.00 | 27.24 |
| 14                                                                               | 38                     | 38              | 104.5                                        | 597480          |                                                                                                                    | 173393                                     | 206163                                                   | 100.27                                                   | 5.16                                                | 13.65                                                | 58.67 | 26.91 |
| 14                                                                               | 48                     | 40              | 114.5                                        | 599495          | 173767                                                                                                             | 205967                                     | 110.30                                                   | 5.19                                                     | 13.70                                               | 58.49                                                | 26.68 |       |
| 14                                                                               | 58                     | 44              | 124.6                                        | 602332          | 174258                                                                                                             | 205675                                     | 120.37                                                   | 5.22                                                     | 13.76                                               | 58.23                                                | 26.37 |       |
| t <sub>correct</sub> (min)                                                       | Partial pressure (kPa) |                 | Rate (mmol L <sup>-1</sup> h <sup>-1</sup> ) |                 | d[H <sub>2</sub> O <sub>2</sub> ]/dt (mmol L <sup>-1</sup> h <sup>-1</sup> )                                       | Σ[H <sub>2</sub> ] (mmol L <sup>-1</sup> ) | [H <sub>2</sub> O <sub>2</sub> ] (mmol L <sup>-1</sup> ) | S <sub>e</sub> (—)                                       | Σ <sub>2</sub> [H <sub>2</sub> O <sub>2</sub> ] (h) | Σ <sub>1</sub> /[H <sub>2</sub> O <sub>2</sub> ] (—) |       |       |
|                                                                                  | P <sub>H2</sub>        | P <sub>O2</sub> | r <sub>H2</sub>                              | r <sub>O2</sub> |                                                                                                                    |                                            |                                                          |                                                          |                                                     |                                                      |       |       |
| 0.00                                                                             | 16.09                  | 32.97           | 52.14                                        | 45.11           | 38.09                                                                                                              | 0.00                                       | 0.00                                                     |                                                          | 0.000                                               | 0.000                                                |       |       |
| 9.84                                                                             | 15.88                  | 33.14           | 52.99                                        | 44.64           | 36.29                                                                                                              | 8.62                                       | 6.10                                                     | 0.71                                                     | 0.082                                               | 1.413                                                |       |       |
| 19.87                                                                            | 15.66                  | 33.30           | 53.85                                        | 44.16           | 34.47                                                                                                              | 17.55                                      | 12.01                                                    | 0.68                                                     | 0.168                                               | 1.461                                                |       |       |
| 29.94                                                                            | 15.43                  | 33.46           | 54.78                                        | 43.75           | 32.73                                                                                                              | 26.66                                      | 17.65                                                    | 0.66                                                     | 0.255                                               | 1.511                                                |       |       |
| 39.97                                                                            | 15.25                  | 33.65           | 55.45                                        | 43.05           | 30.66                                                                                                              | 35.88                                      | 22.95                                                    | 0.64                                                     | 0.344                                               | 1.563                                                |       |       |
| 50.04                                                                            | 15.00                  | 33.79           | 56.49                                        | 42.79           | 29.09                                                                                                              | 45.27                                      | 27.96                                                    | 0.62                                                     | 0.435                                               | 1.619                                                |       |       |
| 60.07                                                                            | 14.66                  | 33.92           | 57.92                                        | 42.80           | 27.68                                                                                                              | 54.84                                      | 32.71                                                    | 0.60                                                     | 0.527                                               | 1.676                                                |       |       |
| 70.14                                                                            | 13.15                  | 34.03           | 64.76                                        | 45.80           | 26.85                                                                                                              | 65.13                                      | 37.28                                                    | 0.57                                                     | 0.620                                               | 1.747                                                |       |       |
| 80.17                                                                            | 12.86                  | 34.13           | 66.00                                        | 45.92           | 25.84                                                                                                              | 76.06                                      | 41.69                                                    | 0.55                                                     | 0.713                                               | 1.824                                                |       |       |
| 90.20                                                                            | 12.89                  | 34.21           | 65.80                                        | 45.43           | 25.06                                                                                                              | 87.08                                      | 45.95                                                    | 0.53                                                     | 0.806                                               | 1.895                                                |       |       |
| 100.27                                                                           | 12.96                  | 34.27           | 65.43                                        | 44.89           | 24.34                                                                                                              | 98.09                                      | 50.09                                                    | 0.51                                                     | 0.900                                               | 1.958                                                |       |       |
| 110.30                                                                           | 12.99                  | 34.32           | 65.23                                        | 44.51           | 23.78                                                                                                              | 109.01                                     | 54.11                                                    | 0.50                                                     | 0.994                                               | 2.015                                                |       |       |
| 120.37                                                                           | 13.04                  | 34.39           | 64.94                                        | 43.99           | 23.03                                                                                                              | 119.93                                     | 58.04                                                    | 0.48                                                     | 1.089                                               | 2.066                                                |       |       |

## H<sub>2</sub>O<sub>2</sub> Synthesis Data Sheet

Entry No. 6 (Exp. Y144) Employed in: Table. 1

| Catalyst, Additives                                                              |                        |                 | Reaction conditions                          |                 | Gas feed rate (sccm)                                                                                               |                                            |                                                          |                                                          |                                                     |                                                      |                |
|----------------------------------------------------------------------------------|------------------------|-----------------|----------------------------------------------|-----------------|--------------------------------------------------------------------------------------------------------------------|--------------------------------------------|----------------------------------------------------------|----------------------------------------------------------|-----------------------------------------------------|------------------------------------------------------|----------------|
| Name                                                                             | Conc.                  | (Unit)          | T <sub>0</sub> (°C)                          | 22.0            |                                                                                                                    | H <sub>2</sub>                             | O <sub>2</sub>                                           | N <sub>2</sub>                                           | Sum                                                 |                                                      |                |
| Pd-PVP                                                                           | 8.33                   | (mg/L)          | T (°C)                                       | 29.9            | Set                                                                                                                | 10.00                                      | 20.00                                                    | 20.00                                                    | 50.00                                               |                                                      |                |
| HAuCl <sub>4</sub>                                                               | 0.0857                 | (mg-Au/L)       | P <sub>0</sub> (hPa)                         | 1012.6          | Calibrated                                                                                                         | 9.94                                       | 18.61                                                    | 19.89                                                    | 48.44                                               |                                                      |                |
| H <sub>2</sub> SO <sub>4</sub>                                                   | 0.01                   | (N)             | P (hPa)                                      | 1020.0          | Determination of final [H <sub>2</sub> O <sub>2</sub> ]                                                            | Sample (g)                                 | Absorbance (—)                                           | [H <sub>2</sub> O <sub>2</sub> ] (mmol L <sup>-1</sup> ) |                                                     |                                                      |                |
| NaBr                                                                             | 0.001                  | (N)             | Agitation (rpm)                              | 1200            |                                                                                                                    |                                            |                                                          |                                                          |                                                     | 0.969                                                | 0.730          |
| Comment:<br>Catalyst activation: H <sub>2</sub> gas 20 sccm at 303 K for 40 min. |                        |                 |                                              |                 | Analysis of H <sub>2</sub> O <sub>2</sub> formation selectivity and H <sub>2</sub> O <sub>2</sub> destruction rate |                                            |                                                          | S <sub>f</sub> (—)                                       | 0.8846                                              |                                                      |                |
|                                                                                  |                        |                 |                                              |                 |                                                                                                                    |                                            |                                                          | k <sub>d</sub> [Cat] (h <sup>-1</sup> )                  | 0.4068                                              |                                                      |                |
|                                                                                  |                        |                 |                                              |                 |                                                                                                                    |                                            |                                                          | R <sup>2</sup>                                           | 0.9997                                              |                                                      |                |
| GC calibration                                                                   |                        | GC count        |                                              |                 | Ratio of sensitivity (toward N <sub>2</sub> )                                                                      |                                            |                                                          | Feed gas measurement                                     |                                                     |                                                      |                |
| Timing                                                                           | No.                    | H <sub>2</sub>  | O <sub>2</sub>                               | N <sub>2</sub>  | H <sub>2</sub>                                                                                                     | O <sub>2</sub>                             |                                                          |                                                          |                                                     |                                                      |                |
| Before reaction                                                                  | 1                      | 999707          | 201760                                       | 174721          | 0.0873                                                                                                             | 0.0872                                     | 0.810                                                    | T <sub>a</sub> (°C)                                      | 22.7                                                |                                                      |                |
|                                                                                  | 2                      | 999076          | 201122                                       | 174141          | 0.0871                                                                                                             |                                            |                                                          | 0.810                                                    | P <sub>0</sub> (hPa)                                | 1013.6                                               |                |
|                                                                                  | 3                      | 997755          | 200981                                       | 174021          | 0.0872                                                                                                             |                                            |                                                          | 0.810                                                    | Flow (cc/min)                                       |                                                      |                |
| After reaction                                                                   | 4                      | 993864          | 200031                                       | 173245          | 0.0871                                                                                                             |                                            |                                                          | 0.811                                                    | H <sub>2</sub>                                      | 11.06                                                |                |
|                                                                                  | 5                      | 994427          | 200152                                       | 173276          | 0.0871                                                                                                             |                                            |                                                          | 0.810                                                    | O <sub>2</sub>                                      | 20.71                                                |                |
|                                                                                  | 6                      | 993444          | 200037                                       | 173269          | 0.0872                                                                                                             |                                            |                                                          | 0.811                                                    | N <sub>2</sub>                                      | 22.13                                                |                |
| Time                                                                             |                        |                 |                                              | GC count        |                                                                                                                    |                                            | t <sub>correct</sub> (min)                               | Outlet flow (sccm)                                       |                                                     | Conversion(%)                                        |                |
| H                                                                                | M                      | S               | min.                                         | H <sub>2</sub>  | O <sub>2</sub>                                                                                                     | N <sub>2</sub>                             |                                                          | H <sub>2</sub>                                           | O <sub>2</sub>                                      | H <sub>2</sub>                                       | O <sub>2</sub> |
| 13                                                                               | 10                     | 42              | 4.0                                          | 548594          | 119053                                                                                                             | 270520                                     | 0.00                                                     | 7.70                                                     | 16.51                                               | 22.49                                                | 11.28          |
| 13                                                                               | 20                     | 44              | 14.0                                         | 807979          | 186599                                                                                                             | 193029                                     | 9.52                                                     | 7.66                                                     | 16.53                                               | 22.88                                                | 11.18          |
| 13                                                                               | 30                     | 46              | 24.1                                         | 821262          | 191625                                                                                                             | 187136                                     | 19.56                                                    | 7.62                                                     | 16.55                                               | 23.30                                                | 11.07          |
| 13                                                                               | 40                     | 50              | 34.1                                         | 818723          | 192489                                                                                                             | 187260                                     | 29.62                                                    | 7.58                                                     | 16.57                                               | 23.75                                                | 10.99          |
| 13                                                                               | 50                     | 52              | 44.2                                         | 813480          | 192424                                                                                                             | 186834                                     | 39.66                                                    | 7.55                                                     | 16.60                                               | 24.06                                                | 10.81          |
| 14                                                                               | 0                      | 56              | 54.2                                         | 807827          | 192468                                                                                                             | 186796                                     | 49.72                                                    | 7.50                                                     | 16.61                                               | 24.57                                                | 10.78          |
| 14                                                                               | 10                     | 58              | 64.3                                         | 802432          | 192471                                                                                                             | 186831                                     | 59.76                                                    | 7.45                                                     | 16.60                                               | 25.09                                                | 10.79          |
| 14                                                                               | 21                     | 2               | 74.3                                         | 797508          | 192741                                                                                                             | 186988                                     | 69.82                                                    | 7.39                                                     | 16.61                                               | 25.61                                                | 10.74          |
| 14                                                                               | 31                     | 4               | 84.4                                         | 792593          | 192951                                                                                                             | 187195                                     | 79.86                                                    | 7.34                                                     | 16.61                                               | 26.15                                                | 10.74          |
| 14                                                                               | 41                     | 8               | 94.4                                         | 787635          | 193081                                                                                                             | 187193                                     | 89.92                                                    | 7.29                                                     | 16.62                                               | 26.62                                                | 10.68          |
| 14                                                                               | 51                     | 10              | 104.5                                        | 784018          | 193505                                                                                                             | 187570                                     | 99.96                                                    | 7.25                                                     | 16.63                                               | 27.10                                                | 10.67          |
| 15                                                                               | 1                      | 14              | 114.5                                        | 779356          | 193519                                                                                                             | 187533                                     | 110.02                                                   | 7.20                                                     | 16.63                                               | 27.52                                                | 10.64          |
| 15                                                                               | 11                     | 16              | 124.6                                        | 775898          | 193677                                                                                                             | 187459                                     | 120.06                                                   | 7.18                                                     | 16.65                                               | 27.81                                                | 10.53          |
| t <sub>correct</sub> (min)                                                       | Partial pressure (kPa) |                 | Rate (mmol L <sup>-1</sup> h <sup>-1</sup> ) |                 | d[H <sub>2</sub> O <sub>2</sub> ]/dt (mmol L <sup>-1</sup> h <sup>-1</sup> )                                       | Σ[H <sub>2</sub> ] (mmol L <sup>-1</sup> ) | [H <sub>2</sub> O <sub>2</sub> ] (mmol L <sup>-1</sup> ) | S <sub>e</sub> (—)                                       | Σ <sub>2</sub> [H <sub>2</sub> O <sub>2</sub> ] (h) | Σ <sub>1</sub> /[H <sub>2</sub> O <sub>2</sub> ] (—) |                |
|                                                                                  | P <sub>H2</sub>        | P <sub>O2</sub> | r <sub>H2</sub>                              | r <sub>O2</sub> |                                                                                                                    |                                            |                                                          |                                                          |                                                     |                                                      |                |
| 0.00                                                                             | 17.08                  | 36.61           | 19.96                                        | 18.74           | 17.52                                                                                                              | 0.00                                       | 0.00                                                     |                                                          | 0.000                                               | 0.000                                                |                |
| 9.52                                                                             | 17.00                  | 36.66           | 20.31                                        | 18.57           | 16.84                                                                                                              | 3.19                                       | 2.73                                                     | 0.85                                                     | 0.079                                               | 1.172                                                |                |
| 19.56                                                                            | 16.92                  | 36.72           | 20.67                                        | 18.40           | 16.12                                                                                                              | 6.62                                       | 5.48                                                     | 0.83                                                     | 0.165                                               | 1.208                                                |                |
| 29.62                                                                            | 16.83                  | 36.78           | 21.07                                        | 18.26           | 15.44                                                                                                              | 10.12                                      | 8.13                                                     | 0.80                                                     | 0.251                                               | 1.245                                                |                |
| 39.66                                                                            | 16.76                  | 36.85           | 21.35                                        | 17.97           | 14.59                                                                                                              | 13.67                                      | 10.64                                                    | 0.78                                                     | 0.340                                               | 1.285                                                |                |
| 49.72                                                                            | 16.66                  | 36.91           | 21.81                                        | 17.91           | 14.01                                                                                                              | 17.29                                      | 13.04                                                    | 0.75                                                     | 0.429                                               | 1.326                                                |                |
| 59.76                                                                            | 16.57                  | 36.95           | 22.27                                        | 17.93           | 13.60                                                                                                              | 20.98                                      | 15.35                                                    | 0.73                                                     | 0.520                                               | 1.367                                                |                |
| 69.82                                                                            | 16.47                  | 37.00           | 22.73                                        | 17.85           | 12.97                                                                                                              | 24.75                                      | 17.57                                                    | 0.71                                                     | 0.611                                               | 1.408                                                |                |
| 79.86                                                                            | 16.37                  | 37.05           | 23.21                                        | 17.85           | 12.49                                                                                                              | 28.59                                      | 19.70                                                    | 0.69                                                     | 0.703                                               | 1.451                                                |                |
| 89.92                                                                            | 16.28                  | 37.10           | 23.62                                        | 17.75           | 11.88                                                                                                              | 32.52                                      | 21.75                                                    | 0.67                                                     | 0.797                                               | 1.495                                                |                |
| 99.96                                                                            | 16.19                  | 37.15           | 24.05                                        | 17.72           | 11.40                                                                                                              | 36.51                                      | 23.69                                                    | 0.65                                                     | 0.892                                               | 1.541                                                |                |
| 110.02                                                                           | 16.11                  | 37.19           | 24.42                                        | 17.68           | 10.94                                                                                                              | 40.57                                      | 25.57                                                    | 0.63                                                     | 0.988                                               | 1.587                                                |                |
| 120.06                                                                           | 16.05                  | 37.24           | 24.68                                        | 17.50           | 10.33                                                                                                              | 44.68                                      | 27.35                                                    | 0.61                                                     | 1.086                                               | 1.634                                                |                |

## H<sub>2</sub>O<sub>2</sub> Synthesis Data Sheet

Entry No. 7 (Exp. G93) Employed in: Table 2

| Catalyst, Additives                                                              |                        |                 | Reaction conditions                          |                 | Gas feed rate (sccm)                                                                                               |                                            |                                                          |                                                          |                                                     |                                                      |                |
|----------------------------------------------------------------------------------|------------------------|-----------------|----------------------------------------------|-----------------|--------------------------------------------------------------------------------------------------------------------|--------------------------------------------|----------------------------------------------------------|----------------------------------------------------------|-----------------------------------------------------|------------------------------------------------------|----------------|
| Name                                                                             | Conc.                  | (Unit)          | T <sub>0</sub> (°C)                          | 8.2             |                                                                                                                    | H <sub>2</sub>                             | O <sub>2</sub>                                           | N <sub>2</sub>                                           | Sum                                                 |                                                      |                |
| Pd-PVP                                                                           | 8.33                   | (mg/L)          | T (°C)                                       | 30.0            | Set                                                                                                                | 10.00                                      | 20.00                                                    | 20.00                                                    | 50.00                                               |                                                      |                |
|                                                                                  |                        |                 | P <sub>0</sub> (hPa)                         | 1006.7          | Calibrated                                                                                                         | 9.98                                       | 18.63                                                    | 19.88                                                    | 48.50                                               |                                                      |                |
|                                                                                  |                        |                 | P (hPa)                                      | 1013.2          | Determination of final [H <sub>2</sub> O <sub>2</sub> ]                                                            | Sample (g)                                 | Absorbance (—)                                           | [H <sub>2</sub> O <sub>2</sub> ] (mmol L <sup>-1</sup> ) |                                                     |                                                      |                |
|                                                                                  |                        |                 | Agitation (rpm)                              | 1200            |                                                                                                                    |                                            |                                                          |                                                          | 2.035                                               | 0.011                                                | 0.12           |
| Comment:<br>Catalyst activation: H <sub>2</sub> gas 20 sccm at 303 K for 40 min. |                        |                 |                                              |                 | Analysis of H <sub>2</sub> O <sub>2</sub> formation selectivity and H <sub>2</sub> O <sub>2</sub> destruction rate |                                            |                                                          | S <sub>f</sub> (—)                                       | 0.0568                                              |                                                      |                |
|                                                                                  |                        |                 |                                              |                 |                                                                                                                    |                                            |                                                          | k <sub>d</sub> [Cat] (h <sup>-1</sup> )                  | 0.1938                                              |                                                      |                |
|                                                                                  |                        |                 |                                              |                 |                                                                                                                    |                                            |                                                          | R <sup>2</sup>                                           | 0.9752                                              |                                                      |                |
| GC calibration                                                                   |                        | GC count        |                                              |                 | Ratio of sensitivity (toward N <sub>2</sub> )                                                                      |                                            |                                                          | Feed gas measurement                                     |                                                     |                                                      |                |
| Timing                                                                           | No.                    | H <sub>2</sub>  | O <sub>2</sub>                               | N <sub>2</sub>  | H <sub>2</sub>                                                                                                     | O <sub>2</sub>                             |                                                          |                                                          |                                                     |                                                      |                |
| Before reaction                                                                  | 1                      | 962461          | 196324                                       | 170438          | 0.0889                                                                                                             | 0.814                                      | 0.813                                                    | T <sub>a</sub> (°C)                                      | 14.0                                                |                                                      |                |
|                                                                                  | 2                      | 965009          | 196948                                       | 170696          | 0.0888                                                                                                             | 0.812                                      |                                                          | P <sub>0</sub> (hPa)                                     | 995.8                                               |                                                      |                |
|                                                                                  | 3                      | 965571          | 197035                                       | 171189          | 0.0890                                                                                                             | 0.814                                      |                                                          | Flow (cc/min)                                            |                                                     |                                                      |                |
| After reaction                                                                   | 4                      | 969884          | 197872                                       | 171543          | 0.0888                                                                                                             | 0.812                                      | H <sub>2</sub>                                           | 10.85                                                    |                                                     |                                                      |                |
|                                                                                  | 5                      | 969999          | 197834                                       | 171485          | 0.0888                                                                                                             | 0.812                                      | O <sub>2</sub>                                           | 20.25                                                    |                                                     |                                                      |                |
|                                                                                  | 6                      | 969916          | 197867                                       | 171679          | 0.0889                                                                                                             | 0.813                                      | N <sub>2</sub>                                           | 21.61                                                    |                                                     |                                                      |                |
| Time                                                                             |                        |                 |                                              | GC count        |                                                                                                                    |                                            | t <sub>correct</sub> (min)                               | Outlet flow (sccm)                                       |                                                     | Conversion(%)                                        |                |
| H                                                                                | M                      | S               | min.                                         | H <sub>2</sub>  | O <sub>2</sub>                                                                                                     | N <sub>2</sub>                             |                                                          | H <sub>2</sub>                                           | O <sub>2</sub>                                      | H <sub>2</sub>                                       | O <sub>2</sub> |
| 10                                                                               | 4                      | 36              | 4.0                                          | 356038          | 109787                                                                                                             | 289721                                     | 0.00                                                     | 3.70                                                     | 15.31                                               | 62.92                                                | 17.83          |
| 10                                                                               | 14                     | 40              | 14.1                                         | 434989          | 189563                                                                                                             | 220142                                     | 10.62                                                    | 3.72                                                     | 15.33                                               | 62.77                                                | 17.74          |
| 10                                                                               | 24                     | 44              | 24.1                                         | 444127          | 199001                                                                                                             | 211854                                     | 20.68                                                    | 3.73                                                     | 15.34                                               | 62.63                                                | 17.67          |
| 10                                                                               | 34                     | 48              | 34.2                                         | 446928          | 200239                                                                                                             | 210891                                     | 30.75                                                    | 3.74                                                     | 15.35                                               | 62.49                                                | 17.63          |
| 10                                                                               | 44                     | 52              | 44.3                                         | 448236          | 200333                                                                                                             | 210472                                     | 40.82                                                    | 3.76                                                     | 15.38                                               | 62.31                                                | 17.43          |
| 10                                                                               | 54                     | 56              | 54.3                                         | 449845          | 200367                                                                                                             | 210626                                     | 50.88                                                    | 3.77                                                     | 15.38                                               | 62.20                                                | 17.47          |
| 11                                                                               | 5                      | 0               | 64.4                                         | 448306          | 199784                                                                                                             | 210005                                     | 60.95                                                    | 3.77                                                     | 15.38                                               | 62.22                                                | 17.47          |
| 11                                                                               | 15                     | 4               | 74.5                                         | 450024          | 199948                                                                                                             | 209732                                     | 71.02                                                    | 3.79                                                     | 15.41                                               | 62.02                                                | 17.30          |
| 11                                                                               | 25                     | 8               | 84.5                                         | 449684          | 200157                                                                                                             | 210377                                     | 81.08                                                    | 3.78                                                     | 15.38                                               | 62.17                                                | 17.46          |
| 11                                                                               | 35                     | 12              | 94.6                                         | 449644          | 199669                                                                                                             | 209266                                     | 91.15                                                    | 3.80                                                     | 15.42                                               | 61.97                                                | 17.23          |
| 11                                                                               | 45                     | 16              | 104.7                                        | 449553          | 199814                                                                                                             | 209919                                     | 101.22                                                   | 3.78                                                     | 15.39                                               | 62.10                                                | 17.42          |
| 11                                                                               | 55                     | 20              | 114.7                                        | 449778          | 199914                                                                                                             | 209948                                     | 111.28                                                   | 3.79                                                     | 15.39                                               | 62.08                                                | 17.39          |
| 12                                                                               | 5                      | 24              | 124.8                                        | 449933          | 199902                                                                                                             | 209919                                     | 121.35                                                   | 3.79                                                     | 15.39                                               | 62.07                                                | 17.39          |
| t <sub>correct</sub> (min)                                                       | Partial pressure (kPa) |                 | Rate (mmol L <sup>-1</sup> h <sup>-1</sup> ) |                 | d[H <sub>2</sub> O <sub>2</sub> ]/dt (mmol L <sup>-1</sup> h <sup>-1</sup> )                                       | Σ[H <sub>2</sub> ] (mmol L <sup>-1</sup> ) | [H <sub>2</sub> O <sub>2</sub> ] (mmol L <sup>-1</sup> ) | S <sub>e</sub> (—)                                       | Σ <sub>2</sub> [H <sub>2</sub> O <sub>2</sub> ] (h) | Σ <sub>1</sub> /[H <sub>2</sub> O <sub>2</sub> ] (—) |                |
|                                                                                  | P <sub>H2</sub>        | P <sub>O2</sub> | r <sub>H2</sub>                              | r <sub>O2</sub> |                                                                                                                    |                                            |                                                          |                                                          |                                                     |                                                      |                |
| 0.00                                                                             | 9.24                   | 38.21           | 56.09                                        | 29.66           | 3.23                                                                                                               | 0.00                                       | 0.00                                                     |                                                          | 0.000                                               | 0.000                                                |                |
| 10.62                                                                            | 9.27                   | 38.22           | 55.95                                        | 29.52           | 3.09                                                                                                               | 9.91                                       | 0.56                                                     | 0.06                                                     | 0.088                                               | 17.743                                               |                |
| 20.68                                                                            | 9.30                   | 38.23           | 55.82                                        | 29.39           | 2.96                                                                                                               | 19.29                                      | 1.07                                                     | 0.06                                                     | 0.174                                               | 18.093                                               |                |
| 30.75                                                                            | 9.33                   | 38.23           | 55.70                                        | 29.33           | 2.96                                                                                                               | 28.64                                      | 1.56                                                     | 0.05                                                     | 0.260                                               | 18.333                                               |                |
| 40.82                                                                            | 9.36                   | 38.27           | 55.54                                        | 28.99           | 2.45                                                                                                               | 37.98                                      | 2.02                                                     | 0.05                                                     | 0.350                                               | 18.840                                               |                |
| 50.88                                                                            | 9.39                   | 38.24           | 55.44                                        | 29.07           | 2.70                                                                                                               | 47.29                                      | 2.45                                                     | 0.05                                                     | 0.442                                               | 19.322                                               |                |
| 60.95                                                                            | 9.38                   | 38.25           | 55.46                                        | 29.06           | 2.67                                                                                                               | 56.59                                      | 2.90                                                     | 0.05                                                     | 0.528                                               | 19.529                                               |                |
| 71.02                                                                            | 9.42                   | 38.28           | 55.28                                        | 28.77           | 2.26                                                                                                               | 65.88                                      | 3.31                                                     | 0.05                                                     | 0.619                                               | 19.895                                               |                |
| 81.08                                                                            | 9.39                   | 38.24           | 55.41                                        | 29.05           | 2.69                                                                                                               | 75.16                                      | 3.73                                                     | 0.05                                                     | 0.709                                               | 20.171                                               |                |
| 91.15                                                                            | 9.43                   | 38.29           | 55.24                                        | 28.66           | 2.08                                                                                                               | 84.45                                      | 4.13                                                     | 0.05                                                     | 0.800                                               | 20.465                                               |                |
| 101.22                                                                           | 9.41                   | 38.25           | 55.35                                        | 28.99           | 2.62                                                                                                               | 93.72                                      | 4.52                                                     | 0.05                                                     | 0.890                                               | 20.731                                               |                |
| 111.28                                                                           | 9.41                   | 38.25           | 55.34                                        | 28.94           | 2.54                                                                                                               | 103.01                                     | 4.95                                                     | 0.05                                                     | 0.973                                               | 20.793                                               |                |
| 121.35                                                                           | 9.41                   | 38.25           | 55.32                                        | 28.93           | 2.53                                                                                                               | 112.29                                     | 5.38                                                     | 0.05                                                     | 1.057                                               | 20.875                                               |                |



## H<sub>2</sub>O<sub>2</sub> Synthesis Data Sheet

Entry No. 8 (Exp. T079) Employed in: Table 2

| Catalyst, Additives                                                              |                        |                 | Reaction conditions                          |                 | Gas feed rate (sccm)                                                                                               |                                            |                                                          |                                                          |                                                     |                                                      |                |
|----------------------------------------------------------------------------------|------------------------|-----------------|----------------------------------------------|-----------------|--------------------------------------------------------------------------------------------------------------------|--------------------------------------------|----------------------------------------------------------|----------------------------------------------------------|-----------------------------------------------------|------------------------------------------------------|----------------|
| Name                                                                             | Conc.                  | (Unit)          | T <sub>0</sub> (°C)                          | 27.6            |                                                                                                                    | H <sub>2</sub>                             | O <sub>2</sub>                                           | N <sub>2</sub>                                           | Sum                                                 |                                                      |                |
| Pt-PVP                                                                           | 8.36                   | (mg/L)          | T (°C)                                       | 30.1            | Set                                                                                                                | 10.00                                      | 20.00                                                    | 20.00                                                    | 50.00                                               |                                                      |                |
|                                                                                  |                        |                 | P <sub>0</sub> (hPa)                         | 1003.9          | Calibrated                                                                                                         | 10.10                                      | 18.49                                                    | 20.23                                                    | 48.82                                               |                                                      |                |
|                                                                                  |                        |                 | P (hPa)                                      | 1012.3          | Determination of final [H <sub>2</sub> O <sub>2</sub> ]                                                            | Sample (g)                                 | Absorbance (—)                                           | [H <sub>2</sub> O <sub>2</sub> ] (mmol L <sup>-1</sup> ) |                                                     |                                                      |                |
|                                                                                  |                        |                 | Agitation (rpm)                              | 1199            |                                                                                                                    |                                            |                                                          |                                                          | 1.658                                               | 0.006                                                | 0.12           |
| Comment:<br>Catalyst activation: H <sub>2</sub> gas 20 sccm at 303 K for 40 min. |                        |                 |                                              |                 | Analysis of H <sub>2</sub> O <sub>2</sub> formation selectivity and H <sub>2</sub> O <sub>2</sub> destruction rate |                                            |                                                          | S <sub>f</sub> (—)                                       | 0.4751                                              |                                                      |                |
|                                                                                  |                        |                 |                                              |                 |                                                                                                                    |                                            |                                                          | k <sub>d</sub> [Cat] (h <sup>-1</sup> )                  | 0.0972                                              |                                                      |                |
|                                                                                  |                        |                 |                                              |                 |                                                                                                                    |                                            |                                                          | R <sup>2</sup>                                           | 0.4323                                              |                                                      |                |
| GC calibration                                                                   |                        | GC count        |                                              |                 | Ratio of sensitivity (toward N <sub>2</sub> )                                                                      |                                            | Feed gas measurement                                     |                                                          |                                                     |                                                      |                |
| Timing                                                                           | No.                    | H <sub>2</sub>  | O <sub>2</sub>                               | N <sub>2</sub>  | H <sub>2</sub>                                                                                                     | O <sub>2</sub>                             |                                                          |                                                          |                                                     |                                                      |                |
| Before reaction                                                                  | 1                      | 978197          | 193964                                       | 172963          | 0.0882                                                                                                             | 0.0881                                     | 0.815                                                    | 0.814                                                    | T <sub>a</sub> (°C)                                 | 27.2                                                 |                |
|                                                                                  | 2                      | 978267          | 194028                                       | 173088          | 0.0883                                                                                                             |                                            |                                                          |                                                          | 0.815                                               | P <sub>0</sub> (hPa)                                 | 1005.5         |
|                                                                                  | 3                      | 979482          | 193662                                       | 172867          | 0.0881                                                                                                             |                                            |                                                          |                                                          | 0.815                                               | Flow (cc/min)                                        |                |
| After reaction                                                                   | 4                      | 978665          | 193259                                       | 172422          | 0.0879                                                                                                             | 0.0881                                     | 0.815                                                    | 0.814                                                    | H <sub>2</sub>                                      | 11.60                                                |                |
|                                                                                  | 5                      | 978510          | 193982                                       | 172683          | 0.0880                                                                                                             |                                            |                                                          |                                                          | 0.813                                               | O <sub>2</sub>                                       | 21.24          |
|                                                                                  | 6                      | 978822          | 193885                                       | 172643          | 0.0880                                                                                                             |                                            |                                                          |                                                          | 0.813                                               | N <sub>2</sub>                                       | 23.25          |
| Time                                                                             |                        |                 |                                              | GC count        |                                                                                                                    |                                            | t <sub>correct</sub> (min)                               | Outlet flow (sccm)                                       |                                                     | Conversion(%)                                        |                |
| H                                                                                | M                      | S               | min.                                         | H <sub>2</sub>  | O <sub>2</sub>                                                                                                     | N <sub>2</sub>                             |                                                          | H <sub>2</sub>                                           | O <sub>2</sub>                                      | H <sub>2</sub>                                       | O <sub>2</sub> |
| 14                                                                               | 52                     | 6               | 4.0                                          | 713263          | 119074                                                                                                             | 245565                                     | 0.00                                                     | 9.91                                                     | 18.35                                               | 1.86                                                 | 0.74           |
| 15                                                                               | 2                      | 8               | 14.0                                         | 924076          | 183429                                                                                                             | 173198                                     | 9.94                                                     | 9.91                                                     | 18.35                                               | 1.80                                                 | 0.72           |
| 15                                                                               | 12                     | 12              | 24.1                                         | 935936          | 187741                                                                                                             | 168891                                     | 20.01                                                    | 9.92                                                     | 18.36                                               | 1.73                                                 | 0.69           |
| 15                                                                               | 22                     | 14              | 34.1                                         | 936540          | 187327                                                                                                             | 168182                                     | 30.04                                                    | 9.93                                                     | 18.36                                               | 1.69                                                 | 0.70           |
| 15                                                                               | 32                     | 16              | 44.2                                         | 936131          | 187200                                                                                                             | 167862                                     | 40.08                                                    | 9.94                                                     | 18.38                                               | 1.54                                                 | 0.58           |
| 15                                                                               | 42                     | 20              | 54.2                                         | 935471          | 186952                                                                                                             | 167759                                     | 50.14                                                    | 9.94                                                     | 18.37                                               | 1.55                                                 | 0.65           |
| 15                                                                               | 52                     | 22              | 64.3                                         | 935235          | 186995                                                                                                             | 167663                                     | 60.18                                                    | 9.94                                                     | 18.38                                               | 1.52                                                 | 0.57           |
| 16                                                                               | 2                      | 26              | 74.3                                         | 936382          | 187185                                                                                                             | 167806                                     | 70.24                                                    | 9.95                                                     | 18.38                                               | 1.48                                                 | 0.55           |
| 16                                                                               | 12                     | 28              | 84.4                                         | 936875          | 186961                                                                                                             | 167887                                     | 80.28                                                    | 9.95                                                     | 18.35                                               | 1.48                                                 | 0.72           |
| 16                                                                               | 22                     | 32              | 94.4                                         | 935869          | 187004                                                                                                             | 167576                                     | 90.34                                                    | 9.95                                                     | 18.39                                               | 1.40                                                 | 0.51           |
| 16                                                                               | 32                     | 34              | 104.5                                        | 935983          | 187034                                                                                                             | 167696                                     | 100.38                                                   | 9.95                                                     | 18.38                                               | 1.46                                                 | 0.56           |
| 16                                                                               | 42                     | 38              | 114.5                                        | 937081          | 187688                                                                                                             | 168041                                     | 110.44                                                   | 9.94                                                     | 18.41                                               | 1.55                                                 | 0.42           |
| 16                                                                               | 52                     | 40              | 124.6                                        | 937104          | 187804                                                                                                             | 168061                                     | 120.48                                                   | 9.94                                                     | 18.42                                               | 1.56                                                 | 0.37           |
| t <sub>correct</sub> (min)                                                       | Partial pressure (kPa) |                 | Rate (mmol L <sup>-1</sup> h <sup>-1</sup> ) |                 | d[H <sub>2</sub> O <sub>2</sub> ]/dt (mmol L <sup>-1</sup> h <sup>-1</sup> )                                       | Σ[H <sub>2</sub> ] (mmol L <sup>-1</sup> ) | [H <sub>2</sub> O <sub>2</sub> ] (mmol L <sup>-1</sup> ) | S <sub>e</sub> (—)                                       | Σ <sub>2</sub> [H <sub>2</sub> O <sub>2</sub> ] (h) | Σ <sub>1</sub> /[H <sub>2</sub> O <sub>2</sub> ] (—) |                |
|                                                                                  | P <sub>H2</sub>        | P <sub>O2</sub> | r <sub>H2</sub>                              | r <sub>O2</sub> |                                                                                                                    |                                            |                                                          |                                                          |                                                     |                                                      |                |
| 0.00                                                                             | 19.82                  | 36.70           | 1.68                                         | 1.22            | 0.76                                                                                                               | 0.00                                       | 0.00                                                     |                                                          | 0.000                                               | 0.000                                                |                |
| 9.94                                                                             | 19.82                  | 36.70           | 1.62                                         | 1.18            | 0.74                                                                                                               | 0.27                                       | 0.12                                                     | 0.46                                                     | 0.083                                               | 2.193                                                |                |
| 20.01                                                                            | 19.83                  | 36.70           | 1.56                                         | 1.14            | 0.72                                                                                                               | 0.54                                       | 0.25                                                     | 0.46                                                     | 0.168                                               | 2.187                                                |                |
| 30.04                                                                            | 19.84                  | 36.70           | 1.52                                         | 1.15            | 0.78                                                                                                               | 0.80                                       | 0.37                                                     | 0.47                                                     | 0.251                                               | 2.144                                                |                |
| 40.08                                                                            | 19.86                  | 36.71           | 1.39                                         | 0.95            | 0.51                                                                                                               | 1.04                                       | 0.48                                                     | 0.46                                                     | 0.343                                               | 2.171                                                |                |
| 50.14                                                                            | 19.86                  | 36.70           | 1.40                                         | 1.07            | 0.73                                                                                                               | 1.28                                       | 0.58                                                     | 0.46                                                     | 0.435                                               | 2.186                                                |                |
| 60.18                                                                            | 19.86                  | 36.71           | 1.37                                         | 0.93            | 0.50                                                                                                               | 1.51                                       | 0.69                                                     | 0.46                                                     | 0.524                                               | 2.196                                                |                |
| 70.24                                                                            | 19.86                  | 36.71           | 1.34                                         | 0.91            | 0.48                                                                                                               | 1.73                                       | 0.77                                                     | 0.44                                                     | 0.627                                               | 2.259                                                |                |
| 80.28                                                                            | 19.88                  | 36.68           | 1.33                                         | 1.18            | 1.03                                                                                                               | 1.96                                       | 0.89                                                     | 0.46                                                     | 0.694                                               | 2.190                                                |                |
| 90.34                                                                            | 19.87                  | 36.72           | 1.27                                         | 0.84            | 0.42                                                                                                               | 2.18                                       | 1.02                                                     | 0.47                                                     | 0.769                                               | 2.143                                                |                |
| 100.38                                                                           | 19.87                  | 36.71           | 1.32                                         | 0.93            | 0.55                                                                                                               | 2.39                                       | 1.10                                                     | 0.46                                                     | 0.874                                               | 2.182                                                |                |
| 110.44                                                                           | 19.84                  | 36.75           | 1.40                                         | 0.70            | 0.00                                                                                                               | 2.62                                       | 1.14                                                     | 0.44                                                     | 1.003                                               | 2.295                                                |                |
| 120.48                                                                           | 19.84                  | 36.76           | 1.40                                         | 0.61            | -0.18                                                                                                              | 2.85                                       | 1.13                                                     | 0.39                                                     | 1.185                                               | 2.533                                                |                |

## H<sub>2</sub>O<sub>2</sub> Synthesis Data Sheet

Entry No. 9 (Exp. T078) Employed in: Table 2

| Catalyst, Additives                                                              |                        |                 | Reaction conditions                          |                 | Gas feed rate (sccm)                                                                                               |                                            |                                                          |                                                          |                                                     |                                                      |                |
|----------------------------------------------------------------------------------|------------------------|-----------------|----------------------------------------------|-----------------|--------------------------------------------------------------------------------------------------------------------|--------------------------------------------|----------------------------------------------------------|----------------------------------------------------------|-----------------------------------------------------|------------------------------------------------------|----------------|
| Name                                                                             | Conc.                  | (Unit)          | T <sub>0</sub> (°C)                          | 27.4            |                                                                                                                    | H <sub>2</sub>                             | O <sub>2</sub>                                           | N <sub>2</sub>                                           | Sum                                                 |                                                      |                |
| Ru-PVP                                                                           | 8.36                   | (mg/L)          | T (°C)                                       | 30.1            | Set                                                                                                                | 10.00                                      | 20.00                                                    | 20.00                                                    | 50.00                                               |                                                      |                |
|                                                                                  |                        |                 | P <sub>0</sub> (hPa)                         | 1004.8          | Calibrated                                                                                                         | 10.10                                      | 18.49                                                    | 20.23                                                    | 48.82                                               |                                                      |                |
| H <sub>2</sub> SO <sub>4</sub>                                                   | 0.01                   | (N)             | P (hPa)                                      | 1013.2          | Determination of final [H <sub>2</sub> O <sub>2</sub> ]                                                            | Sample (g)                                 | Absorbance (—)                                           | [H <sub>2</sub> O <sub>2</sub> ] (mmol L <sup>-1</sup> ) |                                                     |                                                      |                |
| NaBr                                                                             | 0.001                  | (N)             | Agitation (rpm)                              | 1201            |                                                                                                                    |                                            |                                                          |                                                          | 1.676                                               | 0.031                                                | 0.64           |
| Comment:<br>Catalyst activation: H <sub>2</sub> gas 20 sccm at 303 K for 40 min. |                        |                 |                                              |                 | Analysis of H <sub>2</sub> O <sub>2</sub> formation selectivity and H <sub>2</sub> O <sub>2</sub> destruction rate |                                            |                                                          | S <sub>f</sub> (—)                                       | 0.0893                                              |                                                      |                |
|                                                                                  |                        |                 |                                              |                 |                                                                                                                    |                                            |                                                          | k <sub>d</sub> [Cat] (h <sup>-1</sup> )                  | -0.6413                                             |                                                      |                |
|                                                                                  |                        |                 |                                              |                 |                                                                                                                    |                                            |                                                          | R <sup>2</sup>                                           | 0.8162                                              |                                                      |                |
| GC calibration                                                                   |                        | GC count        |                                              |                 | Ratio of sensitivity (toward N <sub>2</sub> )                                                                      |                                            | Feed gas measurement                                     |                                                          |                                                     |                                                      |                |
| Timing                                                                           | No.                    | H <sub>2</sub>  | O <sub>2</sub>                               | N <sub>2</sub>  | H <sub>2</sub>                                                                                                     | O <sub>2</sub>                             |                                                          |                                                          |                                                     |                                                      |                |
| Before reaction                                                                  | 1                      | 975780          | 193772                                       | 173493          | 0.0887                                                                                                             | 0.0883                                     | 0.817                                                    | T <sub>a</sub> (°C)                                      | 27.2                                                |                                                      |                |
|                                                                                  | 2                      | 977695          | 193987                                       | 173624          | 0.0886                                                                                                             |                                            |                                                          | 0.818                                                    | P <sub>0</sub> (hPa)                                | 1005.5                                               |                |
|                                                                                  | 3                      | 977621          | 193529                                       | 173203          | 0.0884                                                                                                             |                                            |                                                          | 0.818                                                    | Flow (cc/min)                                       |                                                      |                |
| After reaction                                                                   | 4                      | 974601          | 192569                                       | 171816          | 0.0880                                                                                                             | 0.0883                                     | 0.817                                                    | H <sub>2</sub>                                           | 11.60                                               |                                                      |                |
|                                                                                  | 5                      | 974826          | 192525                                       | 171882          | 0.0880                                                                                                             |                                            |                                                          | 0.816                                                    | O <sub>2</sub>                                      | 21.24                                                |                |
|                                                                                  | 6                      | 975100          | 192774                                       | 172118          | 0.0881                                                                                                             |                                            |                                                          | 0.816                                                    | N <sub>2</sub>                                      | 23.25                                                |                |
| Time                                                                             |                        |                 |                                              | GC count        |                                                                                                                    |                                            | t <sub>correct</sub> (min)                               | Outlet flow (sccm)                                       |                                                     | Conversion(%)                                        |                |
| H                                                                                | M                      | S               | min.                                         | H <sub>2</sub>  | O <sub>2</sub>                                                                                                     | N <sub>2</sub>                             |                                                          | H <sub>2</sub>                                           | O <sub>2</sub>                                      | H <sub>2</sub>                                       | O <sub>2</sub> |
| 10                                                                               | 45                     | 18              | 4.0                                          | 650869          | 120683                                                                                                             | 249300                                     | 0.00                                                     | 9.81                                                     | 18.33                                               | 2.79                                                 | 0.83           |
| 10                                                                               | 55                     | 22              | 14.1                                         | 917093          | 183489                                                                                                             | 173815                                     | 9.97                                                     | 9.83                                                     | 18.34                                               | 2.60                                                 | 0.78           |
| 11                                                                               | 5                      | 24              | 24.1                                         | 931437          | 187000                                                                                                             | 168895                                     | 20.00                                                    | 9.85                                                     | 18.35                                               | 2.39                                                 | 0.73           |
| 11                                                                               | 15                     | 28              | 34.2                                         | 932130          | 187451                                                                                                             | 168608                                     | 30.07                                                    | 9.88                                                     | 18.37                                               | 2.18                                                 | 0.62           |
| 11                                                                               | 25                     | 30              | 44.2                                         | 931841          | 186908                                                                                                             | 168294                                     | 40.10                                                    | 9.89                                                     | 18.35                                               | 2.02                                                 | 0.73           |
| 11                                                                               | 35                     | 34              | 54.3                                         | 932287          | 186906                                                                                                             | 167944                                     | 50.17                                                    | 9.92                                                     | 18.39                                               | 1.77                                                 | 0.52           |
| 11                                                                               | 45                     | 36              | 64.3                                         | 930375          | 186392                                                                                                             | 167735                                     | 60.20                                                    | 9.91                                                     | 18.36                                               | 1.85                                                 | 0.67           |
| 11                                                                               | 55                     | 40              | 74.4                                         | 930979          | 186846                                                                                                             | 167864                                     | 70.27                                                    | 9.91                                                     | 18.39                                               | 1.86                                                 | 0.51           |
| 12                                                                               | 5                      | 42              | 84.4                                         | 930678          | 186257                                                                                                             | 167603                                     | 80.30                                                    | 9.92                                                     | 18.36                                               | 1.74                                                 | 0.66           |
| 12                                                                               | 15                     | 46              | 94.5                                         | 930617          | 186145                                                                                                             | 167538                                     | 90.37                                                    | 9.92                                                     | 18.36                                               | 1.71                                                 | 0.69           |
| 12                                                                               | 25                     | 48              | 104.5                                        | 930341          | 186061                                                                                                             | 167379                                     | 100.40                                                   | 9.93                                                     | 18.37                                               | 1.65                                                 | 0.64           |
| 12                                                                               | 35                     | 52              | 114.6                                        | 930916          | 186655                                                                                                             | 167555                                     | 110.47                                                   | 9.92                                                     | 18.41                                               | 1.69                                                 | 0.42           |
| 12                                                                               | 45                     | 54              | 124.6                                        | 931856          | 186869                                                                                                             | 167704                                     | 120.50                                                   | 9.93                                                     | 18.41                                               | 1.68                                                 | 0.40           |
| t <sub>correct</sub> (min)                                                       | Partial pressure (kPa) |                 | Rate (mmol L <sup>-1</sup> h <sup>-1</sup> ) |                 | d[H <sub>2</sub> O <sub>2</sub> ]/dt (mmol L <sup>-1</sup> h <sup>-1</sup> )                                       | Σ[H <sub>2</sub> ] (mmol L <sup>-1</sup> ) | [H <sub>2</sub> O <sub>2</sub> ] (mmol L <sup>-1</sup> ) | S <sub>e</sub> (—)                                       | Σ <sub>2</sub> [H <sub>2</sub> O <sub>2</sub> ] (h) | Σ <sub>1</sub> /[H <sub>2</sub> O <sub>2</sub> ] (—) |                |
|                                                                                  | P <sub>H2</sub>        | P <sub>O2</sub> | r <sub>H2</sub>                              | r <sub>O2</sub> |                                                                                                                    |                                            |                                                          |                                                          |                                                     |                                                      |                |
| 0.00                                                                             | 19.69                  | 36.78           | 2.52                                         | 1.37            | 0.22                                                                                                               | 0.00                                       | 0.00                                                     |                                                          | 0.000                                               | 0.000                                                |                |
| 9.97                                                                             | 19.72                  | 36.78           | 2.34                                         | 1.28            | 0.23                                                                                                               | 0.40                                       | 0.04                                                     | 0.09                                                     | 0.083                                               | 10.914                                               |                |
| 20.00                                                                            | 19.75                  | 36.78           | 2.16                                         | 1.20            | 0.24                                                                                                               | 0.78                                       | 0.08                                                     | 0.10                                                     | 0.165                                               | 10.238                                               |                |
| 30.07                                                                            | 19.78                  | 36.78           | 1.96                                         | 1.03            | 0.10                                                                                                               | 1.13                                       | 0.10                                                     | 0.09                                                     | 0.265                                               | 10.779                                               |                |
| 40.10                                                                            | 19.81                  | 36.75           | 1.83                                         | 1.20            | 0.57                                                                                                               | 1.44                                       | 0.16                                                     | 0.11                                                     | 0.311                                               | 8.988                                                |                |
| 50.17                                                                            | 19.83                  | 36.78           | 1.60                                         | 0.86            | 0.12                                                                                                               | 1.73                                       | 0.22                                                     | 0.13                                                     | 0.373                                               | 7.908                                                |                |
| 60.20                                                                            | 19.83                  | 36.75           | 1.67                                         | 1.11            | 0.54                                                                                                               | 2.00                                       | 0.27                                                     | 0.14                                                     | 0.448                                               | 7.302                                                |                |
| 70.27                                                                            | 19.82                  | 36.79           | 1.68                                         | 0.83            | -0.01                                                                                                              | 2.28                                       | 0.32                                                     | 0.14                                                     | 0.541                                               | 7.163                                                |                |
| 80.30                                                                            | 19.85                  | 36.74           | 1.57                                         | 1.10            | 0.62                                                                                                               | 2.56                                       | 0.37                                                     | 0.14                                                     | 0.622                                               | 6.911                                                |                |
| 90.37                                                                            | 19.85                  | 36.73           | 1.54                                         | 1.13            | 0.72                                                                                                               | 2.82                                       | 0.48                                                     | 0.17                                                     | 0.625                                               | 5.839                                                |                |
| 100.40                                                                           | 19.86                  | 36.74           | 1.49                                         | 1.05            | 0.62                                                                                                               | 3.07                                       | 0.59                                                     | 0.19                                                     | 0.659                                               | 5.168                                                |                |
| 110.47                                                                           | 19.84                  | 36.79           | 1.52                                         | 0.70            | -0.12                                                                                                              | 3.32                                       | 0.64                                                     | 0.19                                                     | 0.779                                               | 5.230                                                |                |
| 120.50                                                                           | 19.84                  | 36.80           | 1.51                                         | 0.66            | -0.20                                                                                                              | 3.58                                       | 0.61                                                     | 0.17                                                     | 0.984                                               | 5.880                                                |                |

## H<sub>2</sub>O<sub>2</sub> Synthesis Data Sheet

Entry No. 10 (Exp. T081) Employed in: Table 2

| Catalyst, Additives                                                              |                        |                 | Reaction conditions                          |                 | Gas feed rate (sccm)                                                                                               |                                            |                                                          |                                                          |                                                     |                                                      |                |
|----------------------------------------------------------------------------------|------------------------|-----------------|----------------------------------------------|-----------------|--------------------------------------------------------------------------------------------------------------------|--------------------------------------------|----------------------------------------------------------|----------------------------------------------------------|-----------------------------------------------------|------------------------------------------------------|----------------|
| Name                                                                             | Conc.                  | (Unit)          | T <sub>0</sub> (°C)                          | 28.4            |                                                                                                                    | H <sub>2</sub>                             | O <sub>2</sub>                                           | N <sub>2</sub>                                           | Sum                                                 |                                                      |                |
| Pt-PVP                                                                           | 8.36                   | (mg/L)          | T (°C)                                       | 30.1            | Set                                                                                                                | 10.00                                      | 20.00                                                    | 20.00                                                    | 50.00                                               |                                                      |                |
|                                                                                  |                        |                 | P <sub>0</sub> (hPa)                         | 1005.1          | Calibrated                                                                                                         | 10.10                                      | 18.49                                                    | 20.23                                                    | 48.82                                               |                                                      |                |
|                                                                                  |                        |                 | P (hPa)                                      | 1013.5          | Determination of final [H <sub>2</sub> O <sub>2</sub> ]                                                            | Sample (g)                                 | Absorbance (—)                                           | [H <sub>2</sub> O <sub>2</sub> ] (mmol L <sup>-1</sup> ) | 0.06                                                |                                                      |                |
|                                                                                  |                        |                 | Agitation (rpm)                              | 1200            |                                                                                                                    |                                            |                                                          |                                                          |                                                     | 1.627                                                | 0.003          |
| Comment:<br>Catalyst activation: H <sub>2</sub> gas 20 sccm at 303 K for 40 min. |                        |                 |                                              |                 | Analysis of H <sub>2</sub> O <sub>2</sub> formation selectivity and H <sub>2</sub> O <sub>2</sub> destruction rate |                                            |                                                          | S <sub>f</sub> (—)                                       | -0.4808                                             |                                                      |                |
|                                                                                  |                        |                 |                                              |                 |                                                                                                                    |                                            |                                                          | k <sub>d</sub> [Cat] (h <sup>-1</sup> )                  | 2.0549                                              |                                                      |                |
|                                                                                  |                        |                 |                                              |                 |                                                                                                                    |                                            |                                                          | R <sup>2</sup>                                           | 0.9910                                              |                                                      |                |
| GC calibration                                                                   |                        | GC count        |                                              |                 | Ratio of sensitivity (toward N <sub>2</sub> )                                                                      |                                            |                                                          | Feed gas measurement                                     |                                                     |                                                      |                |
| Timing                                                                           | No.                    | H <sub>2</sub>  | O <sub>2</sub>                               | N <sub>2</sub>  | H <sub>2</sub>                                                                                                     | O <sub>2</sub>                             |                                                          |                                                          |                                                     |                                                      |                |
| Before reaction                                                                  | 1                      | 979707          | 194167                                       | 173399          | 0.0883                                                                                                             | 0.816                                      | 0.815                                                    | T <sub>a</sub> (°C)                                      | 27.2                                                |                                                      |                |
|                                                                                  | 2                      | 980360          | 194446                                       | 173667          | 0.0884                                                                                                             | 0.816                                      |                                                          | P <sub>0</sub> (hPa)                                     | 1005.5                                              |                                                      |                |
|                                                                                  | 3                      | 980850          | 194313                                       | 173408          | 0.0882                                                                                                             | 0.815                                      |                                                          | Flow (cc/min)                                            |                                                     |                                                      |                |
| After reaction                                                                   | 4                      | 979475          | 194182                                       | 173266          | 0.0883                                                                                                             | 0.815                                      | H <sub>2</sub>                                           | 11.60                                                    |                                                     |                                                      |                |
|                                                                                  | 5                      | 979768          | 194194                                       | 173312          | 0.0883                                                                                                             | 0.815                                      | O <sub>2</sub>                                           | 21.24                                                    |                                                     |                                                      |                |
|                                                                                  | 6                      | 979696          | 194086                                       | 173054          | 0.0881                                                                                                             | 0.815                                      | N <sub>2</sub>                                           | 23.25                                                    |                                                     |                                                      |                |
| Time                                                                             |                        |                 |                                              | GC count        |                                                                                                                    |                                            | t <sub>correct</sub> (min)                               | Outlet flow (sccm)                                       |                                                     | Conversion(%)                                        |                |
| H                                                                                | M                      | S               | min.                                         | H <sub>2</sub>  | O <sub>2</sub>                                                                                                     | N <sub>2</sub>                             |                                                          | H <sub>2</sub>                                           | O <sub>2</sub>                                      | H <sub>2</sub>                                       | O <sub>2</sub> |
| 14                                                                               | 59                     | 30              | 4.0                                          | 697304          | 118197                                                                                                             | 252905                                     | 0.00                                                     | 9.98                                                     | 18.45                                               | 1.10                                                 | 0.18           |
| 15                                                                               | 9                      | 34              | 14.1                                         | 931527          | 184559                                                                                                             | 174116                                     | 9.99                                                     | 9.99                                                     | 18.45                                               | 1.04                                                 | 0.19           |
| 15                                                                               | 19                     | 36              | 24.1                                         | 944908          | 188616                                                                                                             | 169341                                     | 20.02                                                    | 10.00                                                    | 18.45                                               | 0.99                                                 | 0.20           |
| 15                                                                               | 29                     | 40              | 34.2                                         | 945576          | 188746                                                                                                             | 168762                                     | 30.09                                                    | 10.01                                                    | 18.45                                               | 0.89                                                 | 0.18           |
| 15                                                                               | 39                     | 42              | 44.2                                         | 944381          | 188507                                                                                                             | 168682                                     | 40.12                                                    | 10.00                                                    | 18.44                                               | 0.96                                                 | 0.26           |
| 15                                                                               | 49                     | 46              | 54.3                                         | 944437          | 188280                                                                                                             | 168369                                     | 50.19                                                    | 10.02                                                    | 18.45                                               | 0.77                                                 | 0.20           |
| 15                                                                               | 59                     | 48              | 64.3                                         | 945381          | 188523                                                                                                             | 168640                                     | 60.22                                                    | 10.01                                                    | 18.44                                               | 0.84                                                 | 0.23           |
| 16                                                                               | 9                      | 52              | 74.4                                         | 942898          | 187971                                                                                                             | 168005                                     | 70.29                                                    | 10.02                                                    | 18.46                                               | 0.72                                                 | 0.14           |
| 16                                                                               | 19                     | 54              | 84.4                                         | 942372          | 187857                                                                                                             | 168106                                     | 80.32                                                    | 10.01                                                    | 18.44                                               | 0.84                                                 | 0.26           |
| 16                                                                               | 29                     | 58              | 94.5                                         | 943323          | 187995                                                                                                             | 168119                                     | 90.39                                                    | 10.02                                                    | 18.45                                               | 0.74                                                 | 0.20           |
| 16                                                                               | 40                     | 0               | 104.5                                        | 943262          | 187857                                                                                                             | 168015                                     | 100.42                                                   | 10.03                                                    | 18.45                                               | 0.69                                                 | 0.21           |
| 16                                                                               | 50                     | 4               | 114.6                                        | 943323          | 187983                                                                                                             | 168238                                     | 110.49                                                   | 10.01                                                    | 18.43                                               | 0.81                                                 | 0.28           |
| 17                                                                               | 0                      | 6               | 124.6                                        | 943765          | 187983                                                                                                             | 168222                                     | 120.52                                                   | 10.02                                                    | 18.44                                               | 0.76                                                 | 0.27           |
| t <sub>correct</sub> (min)                                                       | Partial pressure (kPa) |                 | Rate (mmol L <sup>-1</sup> h <sup>-1</sup> ) |                 | d[H <sub>2</sub> O <sub>2</sub> ]/dt (mmol L <sup>-1</sup> h <sup>-1</sup> )                                       | Σ[H <sub>2</sub> ] (mmol L <sup>-1</sup> ) | [H <sub>2</sub> O <sub>2</sub> ] (mmol L <sup>-1</sup> ) | S <sub>e</sub> (—)                                       | Σ <sub>2</sub> [H <sub>2</sub> O <sub>2</sub> ] (h) | Σ <sub>1</sub> /[H <sub>2</sub> O <sub>2</sub> ] (—) |                |
|                                                                                  | P <sub>H2</sub>        | P <sub>O2</sub> | r <sub>H2</sub>                              | r <sub>O2</sub> |                                                                                                                    |                                            |                                                          |                                                          |                                                     |                                                      |                |
| 0.00                                                                             | 19.92                  | 36.81           | 0.99                                         | 0.30            | -0.38                                                                                                              | 0.00                                       | 0.00                                                     |                                                          | 0.000                                               | 0.000                                                |                |
| 9.99                                                                             | 19.93                  | 36.81           | 0.94                                         | 0.32            | -0.31                                                                                                              | 0.16                                       | -0.06                                                    | -0.36                                                    | 0.083                                               | -2.807                                               |                |
| 20.02                                                                            | 19.94                  | 36.80           | 0.89                                         | 0.33            | -0.23                                                                                                              | 0.31                                       | -0.10                                                    | -0.33                                                    | 0.177                                               | -3.061                                               |                |
| 30.09                                                                            | 19.96                  | 36.80           | 0.80                                         | 0.30            | -0.20                                                                                                              | 0.46                                       | -0.14                                                    | -0.30                                                    | 0.276                                               | -3.280                                               |                |
| 40.12                                                                            | 19.95                  | 36.79           | 0.87                                         | 0.43            | -0.01                                                                                                              | 0.59                                       | -0.16                                                    | -0.26                                                    | 0.403                                               | -3.808                                               |                |
| 50.19                                                                            | 19.97                  | 36.79           | 0.70                                         | 0.32            | -0.05                                                                                                              | 0.73                                       | -0.16                                                    | -0.22                                                    | 0.556                                               | -4.503                                               |                |
| 60.22                                                                            | 19.97                  | 36.79           | 0.75                                         | 0.38            | 0.00                                                                                                               | 0.85                                       | -0.17                                                    | -0.20                                                    | 0.706                                               | -5.112                                               |                |
| 70.29                                                                            | 19.98                  | 36.80           | 0.65                                         | 0.24            | -0.18                                                                                                              | 0.97                                       | -0.18                                                    | -0.19                                                    | 0.808                                               | -5.340                                               |                |
| 80.32                                                                            | 19.97                  | 36.78           | 0.75                                         | 0.44            | 0.12                                                                                                               | 1.08                                       | -0.19                                                    | -0.17                                                    | 0.952                                               | -5.832                                               |                |
| 90.39                                                                            | 19.98                  | 36.78           | 0.67                                         | 0.33            | -0.02                                                                                                              | 1.20                                       | -0.18                                                    | -0.15                                                    | 1.170                                               | -6.789                                               |                |
| 100.42                                                                           | 19.99                  | 36.78           | 0.62                                         | 0.35            | 0.07                                                                                                               | 1.31                                       | -0.17                                                    | -0.13                                                    | 1.371                                               | -7.603                                               |                |
| 110.49                                                                           | 19.97                  | 36.77           | 0.73                                         | 0.45            | 0.18                                                                                                               | 1.42                                       | -0.15                                                    | -0.11                                                    | 1.739                                               | -9.395                                               |                |
| 120.52                                                                           | 19.98                  | 36.77           | 0.68                                         | 0.44            | 0.19                                                                                                               | 1.54                                       | -0.12                                                    | -0.08                                                    | 2.373                                               | -12.785                                              |                |

## H<sub>2</sub>O<sub>2</sub> Synthesis Data Sheet

Entry No. 11 (Exp. T080) Employed in: Table 2

| Catalyst, Additives                                                              |                        |                 | Reaction conditions                          |                 | Gas feed rate (sccm)                                                                                               |                                            |                                                          |                                                          |                                                     |                                                      |                |
|----------------------------------------------------------------------------------|------------------------|-----------------|----------------------------------------------|-----------------|--------------------------------------------------------------------------------------------------------------------|--------------------------------------------|----------------------------------------------------------|----------------------------------------------------------|-----------------------------------------------------|------------------------------------------------------|----------------|
| Name                                                                             | Conc.                  | (Unit)          | T <sub>0</sub> (°C)                          | 28.8            |                                                                                                                    | H <sub>2</sub>                             | O <sub>2</sub>                                           | N <sub>2</sub>                                           | Sum                                                 |                                                      |                |
| Rh-PVP                                                                           | 8.31                   | (mg/L)          | T (°C)                                       | 30.1            | Set                                                                                                                | 10.00                                      | 20.00                                                    | 20.00                                                    | 50.00                                               |                                                      |                |
|                                                                                  |                        |                 | P <sub>0</sub> (hPa)                         | 1005.8          | Calibrated                                                                                                         | 10.12                                      | 18.41                                                    | 20.24                                                    | 48.77                                               |                                                      |                |
| H <sub>2</sub> SO <sub>4</sub>                                                   | 0.01                   | (N)             | P (hPa)                                      | 1014.1          | Determination of final [H <sub>2</sub> O <sub>2</sub> ]                                                            | Sample (g)                                 | Absorbance (—)                                           | [H <sub>2</sub> O <sub>2</sub> ] (mmol L <sup>-1</sup> ) |                                                     |                                                      |                |
| NaBr                                                                             | 0.001                  | (N)             | Agitation (rpm)                              | 1199            |                                                                                                                    |                                            |                                                          |                                                          |                                                     | 1.681                                                | 0.044          |
| Comment:<br>Catalyst activation: H <sub>2</sub> gas 20 sccm at 303 K for 40 min. |                        |                 |                                              |                 | Analysis of H <sub>2</sub> O <sub>2</sub> formation selectivity and H <sub>2</sub> O <sub>2</sub> destruction rate |                                            |                                                          | S <sub>f</sub> (—)                                       | 0.1167                                              |                                                      |                |
|                                                                                  |                        |                 |                                              |                 |                                                                                                                    |                                            |                                                          | k <sub>d</sub> [Cat] (h <sup>-1</sup> )                  | 0.3794                                              |                                                      |                |
|                                                                                  |                        |                 |                                              |                 |                                                                                                                    |                                            |                                                          | R <sup>2</sup>                                           | 0.9239                                              |                                                      |                |
| GC calibration                                                                   |                        | GC count        |                                              |                 | Ratio of sensitivity (toward N <sub>2</sub> )                                                                      |                                            | Feed gas measurement                                     |                                                          |                                                     |                                                      |                |
| Timing                                                                           | No.                    | H <sub>2</sub>  | O <sub>2</sub>                               | N <sub>2</sub>  | H <sub>2</sub>                                                                                                     | O <sub>2</sub>                             |                                                          |                                                          |                                                     |                                                      |                |
| Before reaction                                                                  | 1                      | 980876          | 194282                                       | 174084          | 0.0887                                                                                                             | 0.0886                                     | 0.813                                                    | T <sub>a</sub> (°C)                                      | 28.5                                                |                                                      |                |
|                                                                                  | 2                      | 982361          | 195102                                       | 174650          | 0.0889                                                                                                             |                                            |                                                          | 0.814                                                    | P <sub>0</sub> (hPa)                                | 1006.2                                               |                |
|                                                                                  | 3                      | 982308          | 195075                                       | 174427          | 0.0887                                                                                                             |                                            |                                                          | 0.813                                                    | Flow (cc/min)                                       |                                                      |                |
| After reaction                                                                   | 4                      | 979292          | 194274                                       | 173348          | 0.0885                                                                                                             |                                            |                                                          | 0.811                                                    | H <sub>2</sub>                                      | 11.70                                                |                |
|                                                                                  | 5                      | 978960          | 194196                                       | 173328          | 0.0885                                                                                                             |                                            |                                                          | 0.812                                                    | O <sub>2</sub>                                      | 21.29                                                |                |
|                                                                                  | 6                      | 978748          | 194241                                       | 173359          | 0.0885                                                                                                             |                                            |                                                          | 0.812                                                    | N <sub>2</sub>                                      | 23.41                                                |                |
| Time                                                                             |                        |                 |                                              | GC count        |                                                                                                                    |                                            | t <sub>correct</sub> (min)                               | Outlet flow (sccm)                                       |                                                     | Conversion(%)                                        |                |
| H                                                                                | M                      | S               | min.                                         | H <sub>2</sub>  | O <sub>2</sub>                                                                                                     | N <sub>2</sub>                             |                                                          | H <sub>2</sub>                                           | O <sub>2</sub>                                      | H <sub>2</sub>                                       | O <sub>2</sub> |
| 10                                                                               | 31                     | 22              | 4.0                                          | 615460          | 120517                                                                                                             | 256558                                     | 0.00                                                     | 9.57                                                     | 18.10                                               | 5.44                                                 | 1.66           |
| 10                                                                               | 41                     | 26              | 14.1                                         | 899845          | 184585                                                                                                             | 176728                                     | 9.93                                                     | 9.58                                                     | 18.11                                               | 5.28                                                 | 1.60           |
| 10                                                                               | 51                     | 28              | 24.1                                         | 916482          | 188558                                                                                                             | 171761                                     | 19.96                                                    | 9.60                                                     | 18.12                                               | 5.11                                                 | 1.55           |
| 11                                                                               | 1                      | 32              | 34.2                                         | 917948          | 188715                                                                                                             | 171171                                     | 30.03                                                    | 9.62                                                     | 18.14                                               | 4.90                                                 | 1.46           |
| 11                                                                               | 11                     | 34              | 44.2                                         | 919379          | 188835                                                                                                             | 171398                                     | 40.06                                                    | 9.62                                                     | 18.13                                               | 4.88                                                 | 1.53           |
| 11                                                                               | 21                     | 38              | 54.3                                         | 918516          | 188371                                                                                                             | 170680                                     | 50.13                                                    | 9.65                                                     | 18.16                                               | 4.57                                                 | 1.36           |
| 11                                                                               | 31                     | 40              | 64.3                                         | 919509          | 188492                                                                                                             | 170706                                     | 60.16                                                    | 9.66                                                     | 18.17                                               | 4.48                                                 | 1.31           |
| 11                                                                               | 41                     | 44              | 74.4                                         | 918811          | 188173                                                                                                             | 170363                                     | 70.23                                                    | 9.68                                                     | 18.17                                               | 4.36                                                 | 1.28           |
| 11                                                                               | 51                     | 46              | 84.4                                         | 919550          | 188315                                                                                                             | 170445                                     | 80.26                                                    | 9.68                                                     | 18.18                                               | 4.33                                                 | 1.25           |
| 12                                                                               | 1                      | 50              | 94.5                                         | 920351          | 188370                                                                                                             | 170376                                     | 90.33                                                    | 9.69                                                     | 18.19                                               | 4.20                                                 | 1.18           |
| 12                                                                               | 11                     | 52              | 104.5                                        | 919670          | 188098                                                                                                             | 170182                                     | 100.36                                                   | 9.69                                                     | 18.19                                               | 4.17                                                 | 1.21           |
| 12                                                                               | 21                     | 56              | 114.6                                        | 920588          | 188260                                                                                                             | 170268                                     | 110.43                                                   | 9.70                                                     | 18.19                                               | 4.12                                                 | 1.18           |
| 12                                                                               | 31                     | 58              | 124.6                                        | 920720          | 188149                                                                                                             | 170056                                     | 120.46                                                   | 9.71                                                     | 18.20                                               | 3.99                                                 | 1.11           |
| t <sub>correct</sub> (min)                                                       | Partial pressure (kPa) |                 | Rate (mmol L <sup>-1</sup> h <sup>-1</sup> ) |                 | d[H <sub>2</sub> O <sub>2</sub> ]/dt (mmol L <sup>-1</sup> h <sup>-1</sup> )                                       | Σ[H <sub>2</sub> ] (mmol L <sup>-1</sup> ) | [H <sub>2</sub> O <sub>2</sub> ] (mmol L <sup>-1</sup> ) | S <sub>e</sub> (—)                                       | Σ <sub>2</sub> [H <sub>2</sub> O <sub>2</sub> ] (h) | Σ <sub>1</sub> /[H <sub>2</sub> O <sub>2</sub> ] (—) |                |
|                                                                                  | P <sub>H2</sub>        | P <sub>O2</sub> | r <sub>H2</sub>                              | r <sub>O2</sub> |                                                                                                                    |                                            |                                                          |                                                          |                                                     |                                                      |                |
| 0.00                                                                             | 19.40                  | 36.71           | 4.92                                         | 2.72            | 0.53                                                                                                               | 0.00                                       | 0.00                                                     |                                                          | 0.000                                               | 0.000                                                |                |
| 9.93                                                                             | 19.42                  | 36.71           | 4.77                                         | 2.64            | 0.51                                                                                                               | 0.80                                       | 0.09                                                     | 0.11                                                     | 0.083                                               | 9.379                                                |                |
| 19.96                                                                            | 19.45                  | 36.71           | 4.62                                         | 2.55            | 0.49                                                                                                               | 1.59                                       | 0.17                                                     | 0.11                                                     | 0.168                                               | 9.413                                                |                |
| 30.03                                                                            | 19.47                  | 36.72           | 4.42                                         | 2.40            | 0.38                                                                                                               | 2.34                                       | 0.24                                                     | 0.10                                                     | 0.260                                               | 9.725                                                |                |
| 40.06                                                                            | 19.48                  | 36.70           | 4.40                                         | 2.51            | 0.62                                                                                                               | 3.08                                       | 0.32                                                     | 0.11                                                     | 0.339                                               | 9.493                                                |                |
| 50.13                                                                            | 19.52                  | 36.72           | 4.12                                         | 2.23            | 0.34                                                                                                               | 3.80                                       | 0.41                                                     | 0.11                                                     | 0.422                                               | 9.369                                                |                |
| 60.16                                                                            | 19.53                  | 36.72           | 4.04                                         | 2.15            | 0.26                                                                                                               | 4.48                                       | 0.46                                                     | 0.10                                                     | 0.534                                               | 9.837                                                |                |
| 70.23                                                                            | 19.55                  | 36.72           | 3.94                                         | 2.10            | 0.27                                                                                                               | 5.15                                       | 0.50                                                     | 0.10                                                     | 0.647                                               | 10.307                                               |                |
| 80.26                                                                            | 19.55                  | 36.72           | 3.91                                         | 2.06            | 0.20                                                                                                               | 5.81                                       | 0.54                                                     | 0.09                                                     | 0.761                                               | 10.772                                               |                |
| 90.33                                                                            | 19.57                  | 36.73           | 3.80                                         | 1.94            | 0.09                                                                                                               | 6.45                                       | 0.56                                                     | 0.09                                                     | 0.892                                               | 11.448                                               |                |
| 100.36                                                                           | 19.58                  | 36.72           | 3.76                                         | 1.99            | 0.22                                                                                                               | 7.08                                       | 0.59                                                     | 0.08                                                     | 1.016                                               | 12.014                                               |                |
| 110.43                                                                           | 19.58                  | 36.72           | 3.72                                         | 1.94            | 0.15                                                                                                               | 7.71                                       | 0.62                                                     | 0.08                                                     | 1.128                                               | 12.420                                               |                |
| 120.46                                                                           | 19.60                  | 36.73           | 3.60                                         | 1.83            | 0.06                                                                                                               | 8.32                                       | 0.64                                                     | 0.08                                                     | 1.263                                               | 13.043                                               |                |

## H<sub>2</sub>O<sub>2</sub> Synthesis Data Sheet

Entry No. 12 (Exp. Y276) Employed in: Table 2

| Catalyst, Additives                                                              |                        |                 | Reaction conditions                          |                 | Gas feed rate (sccm)                                                                                               |                                            |                                                          |                                                          |                                                     |                                                      |      |
|----------------------------------------------------------------------------------|------------------------|-----------------|----------------------------------------------|-----------------|--------------------------------------------------------------------------------------------------------------------|--------------------------------------------|----------------------------------------------------------|----------------------------------------------------------|-----------------------------------------------------|------------------------------------------------------|------|
| Name                                                                             | Conc.                  | (Unit)          | T <sub>0</sub> (°C)                          | 20.3            |                                                                                                                    | H <sub>2</sub>                             | O <sub>2</sub>                                           | N <sub>2</sub>                                           | Sum                                                 |                                                      |      |
| Ir-PVP                                                                           | 8.2                    | (mg/L)          | T (°C)                                       | 29.8            | Set                                                                                                                | 10.00                                      | 20.00                                                    | 20.00                                                    | 50.00                                               |                                                      |      |
|                                                                                  |                        |                 | P <sub>0</sub> (hPa)                         | 1004.0          | Calibrated                                                                                                         | 10.06                                      | 18.57                                                    | 19.77                                                    | 48.40                                               |                                                      |      |
|                                                                                  |                        |                 | P (hPa)                                      | 1012.2          | Determination of final [H <sub>2</sub> O <sub>2</sub> ]                                                            | Sample (g)                                 | Absorbance (—)                                           | [H <sub>2</sub> O <sub>2</sub> ] (mmol L <sup>-1</sup> ) |                                                     |                                                      |      |
|                                                                                  |                        |                 | Agitation (rpm)                              | 1205            |                                                                                                                    |                                            |                                                          |                                                          | 1.455                                               | 0.005                                                | 0.12 |
| Comment:<br>Catalyst activation: H <sub>2</sub> gas 20 sccm at 303 K for 40 min. |                        |                 |                                              |                 | Analysis of H <sub>2</sub> O <sub>2</sub> formation selectivity and H <sub>2</sub> O <sub>2</sub> destruction rate |                                            |                                                          | S <sub>f</sub> (—)                                       | 0.0630                                              |                                                      |      |
|                                                                                  |                        |                 |                                              |                 |                                                                                                                    |                                            |                                                          | k <sub>d</sub> [Cat] (h <sup>-1</sup> )                  | -0.0329                                             |                                                      |      |
|                                                                                  |                        |                 |                                              |                 |                                                                                                                    |                                            |                                                          | R <sup>2</sup>                                           | 0.0504                                              |                                                      |      |
| GC calibration                                                                   |                        | GC count        |                                              |                 | Ratio of sensitivity (toward N <sub>2</sub> )                                                                      |                                            |                                                          | Feed gas measurement                                     |                                                     |                                                      |      |
| Timing                                                                           | No.                    | H <sub>2</sub>  | O <sub>2</sub>                               | N <sub>2</sub>  | H <sub>2</sub>                                                                                                     | O <sub>2</sub>                             |                                                          |                                                          |                                                     |                                                      |      |
| Before reaction                                                                  | 1                      | 1007788         | 203036                                       | 175872          | 0.0888                                                                                                             | 0.814                                      | 0.814                                                    | T <sub>a</sub> (°C)                                      | 20.4                                                |                                                      |      |
|                                                                                  | 2                      | 1005525         | 202776                                       | 175518          | 0.0888                                                                                                             | 0.813                                      |                                                          | P <sub>0</sub> (hPa)                                     | 1003.2                                              |                                                      |      |
|                                                                                  | 3                      | 1005144         | 202857                                       | 175649          | 0.0889                                                                                                             | 0.813                                      |                                                          | Flow (cc/min)                                            |                                                     |                                                      |      |
| After reaction                                                                   | 4                      | 1004429         | 202491                                       | 175450          | 0.0888                                                                                                             | 0.814                                      | H <sub>2</sub>                                           | 11.18                                                    |                                                     |                                                      |      |
|                                                                                  | 5                      | 1004519         | 202587                                       | 175483          | 0.0889                                                                                                             | 0.814                                      | O <sub>2</sub>                                           | 20.65                                                    |                                                     |                                                      |      |
|                                                                                  | 6                      | 1005535         | 202792                                       | 175583          | 0.0888                                                                                                             | 0.813                                      | N <sub>2</sub>                                           | 21.98                                                    |                                                     |                                                      |      |
| Time                                                                             |                        | GC count        |                                              |                 | t <sub>correct</sub> (min)                                                                                         | Outlet flow (sccm)                         |                                                          | Conversion(%)                                            |                                                     |                                                      |      |
| H                                                                                | M                      | S               | min.                                         | H <sub>2</sub>  |                                                                                                                    | O <sub>2</sub>                             | N <sub>2</sub>                                           | H <sub>2</sub>                                           | O <sub>2</sub>                                      |                                                      |      |
| 15                                                                               | 5                      | 18              | 4.0                                          | 708180          | 126364                                                                                                             | 254587                                     | 0.00                                                     | 9.38                                                     | 18.22                                               | 6.70                                                 | 1.91 |
| 15                                                                               | 15                     | 20              | 14.0                                         | 923377          | 193871                                                                                                             | 179863                                     | 10.24                                                    | 9.41                                                     | 18.23                                               | 6.42                                                 | 1.84 |
| 15                                                                               | 25                     | 24              | 24.1                                         | 938551          | 197928                                                                                                             | 175101                                     | 20.30                                                    | 9.44                                                     | 18.25                                               | 6.13                                                 | 1.77 |
| 15                                                                               | 35                     | 26              | 34.1                                         | 941906          | 198318                                                                                                             | 174740                                     | 30.34                                                    | 9.47                                                     | 18.26                                               | 5.87                                                 | 1.71 |
| 15                                                                               | 45                     | 30              | 44.2                                         | 943797          | 198262                                                                                                             | 174493                                     | 40.40                                                    | 9.50                                                     | 18.28                                               | 5.54                                                 | 1.60 |
| 15                                                                               | 55                     | 32              | 54.2                                         | 945775          | 198236                                                                                                             | 174413                                     | 50.44                                                    | 9.52                                                     | 18.28                                               | 5.30                                                 | 1.57 |
| 16                                                                               | 5                      | 36              | 64.3                                         | 951165          | 199147                                                                                                             | 174993                                     | 60.50                                                    | 9.55                                                     | 18.31                                               | 5.08                                                 | 1.44 |
| 16                                                                               | 15                     | 38              | 74.3                                         | 950767          | 198790                                                                                                             | 174648                                     | 70.54                                                    | 9.56                                                     | 18.31                                               | 4.93                                                 | 1.43 |
| 16                                                                               | 25                     | 42              | 84.4                                         | 951323          | 198692                                                                                                             | 174358                                     | 80.60                                                    | 9.58                                                     | 18.33                                               | 4.72                                                 | 1.31 |
| 16                                                                               | 35                     | 44              | 94.4                                         | 951744          | 198558                                                                                                             | 174314                                     | 90.64                                                    | 9.59                                                     | 18.32                                               | 4.65                                                 | 1.35 |
| 16                                                                               | 45                     | 48              | 104.5                                        | 952921          | 198891                                                                                                             | 174505                                     | 100.70                                                   | 9.59                                                     | 18.33                                               | 4.64                                                 | 1.30 |
| 16                                                                               | 55                     | 50              | 114.5                                        | 953218          | 198640                                                                                                             | 174320                                     | 110.74                                                   | 9.60                                                     | 18.33                                               | 4.51                                                 | 1.32 |
| 17                                                                               | 5                      | 52              | 124.6                                        | 953181          | 198599                                                                                                             | 174330                                     | 120.77                                                   | 9.60                                                     | 18.33                                               | 4.52                                                 | 1.34 |
| t <sub>correct</sub> (min)                                                       | Partial pressure (kPa) |                 | Rate (mmol L <sup>-1</sup> h <sup>-1</sup> ) |                 | d[H <sub>2</sub> O <sub>2</sub> ]/dt (mmol L <sup>-1</sup> h <sup>-1</sup> )                                       | Σ[H <sub>2</sub> ] (mmol L <sup>-1</sup> ) | [H <sub>2</sub> O <sub>2</sub> ] (mmol L <sup>-1</sup> ) | S <sub>e</sub> (—)                                       | Σ <sub>2</sub> [H <sub>2</sub> O <sub>2</sub> ] (h) | Σ <sub>1</sub> /[H <sub>2</sub> O <sub>2</sub> ] (—) |      |
|                                                                                  | P <sub>H2</sub>        | P <sub>O2</sub> | r <sub>H2</sub>                              | r <sub>O2</sub> |                                                                                                                    |                                            |                                                          |                                                          |                                                     |                                                      |      |
| 0.00                                                                             | 19.21                  | 37.30           | 6.02                                         | 3.17            | 0.33                                                                                                               | 0.00                                       | 0.00                                                     |                                                          | 0.000                                               | 0.000                                                |      |
| 10.24                                                                            | 19.25                  | 37.29           | 5.76                                         | 3.05            | 0.35                                                                                                               | 1.00                                       | 0.06                                                     | 0.06                                                     | 0.085                                               | 17.266                                               |      |
| 20.30                                                                            | 19.29                  | 37.29           | 5.51                                         | 2.94            | 0.36                                                                                                               | 1.95                                       | 0.12                                                     | 0.06                                                     | 0.167                                               | 16.529                                               |      |
| 30.34                                                                            | 19.33                  | 37.28           | 5.27                                         | 2.84            | 0.41                                                                                                               | 2.85                                       | 0.18                                                     | 0.06                                                     | 0.246                                               | 15.602                                               |      |
| 40.40                                                                            | 19.37                  | 37.28           | 4.98                                         | 2.65            | 0.33                                                                                                               | 3.71                                       | 0.24                                                     | 0.07                                                     | 0.330                                               | 15.150                                               |      |
| 50.44                                                                            | 19.41                  | 37.27           | 4.76                                         | 2.60            | 0.44                                                                                                               | 4.52                                       | 0.31                                                     | 0.07                                                     | 0.411                                               | 14.623                                               |      |
| 60.50                                                                            | 19.44                  | 37.28           | 4.56                                         | 2.39            | 0.23                                                                                                               | 5.31                                       | 0.37                                                     | 0.07                                                     | 0.503                                               | 14.517                                               |      |
| 70.54                                                                            | 19.46                  | 37.27           | 4.43                                         | 2.36            | 0.30                                                                                                               | 6.06                                       | 0.41                                                     | 0.07                                                     | 0.606                                               | 14.777                                               |      |
| 80.60                                                                            | 19.49                  | 37.28           | 4.24                                         | 2.17            | 0.11                                                                                                               | 6.78                                       | 0.44                                                     | 0.07                                                     | 0.720                                               | 15.256                                               |      |
| 90.64                                                                            | 19.50                  | 37.27           | 4.18                                         | 2.24            | 0.31                                                                                                               | 7.49                                       | 0.48                                                     | 0.06                                                     | 0.828                                               | 15.599                                               |      |
| 100.70                                                                           | 19.50                  | 37.28           | 4.16                                         | 2.15            | 0.13                                                                                                               | 8.19                                       | 0.52                                                     | 0.06                                                     | 0.931                                               | 15.835                                               |      |
| 110.74                                                                           | 19.52                  | 37.26           | 4.05                                         | 2.18            | 0.32                                                                                                               | 8.87                                       | 0.55                                                     | 0.06                                                     | 1.029                                               | 16.004                                               |      |
| 120.77                                                                           | 19.52                  | 37.26           | 4.05                                         | 2.22            | 0.39                                                                                                               | 9.55                                       | 0.61                                                     | 0.06                                                     | 1.089                                               | 15.561                                               |      |

## H<sub>2</sub>O<sub>2</sub> Synthesis Data Sheet

Entry No. 13 (Exp. Y169) Employed in: Table 2

| Catalyst, Additives                                                              |                        |                 | Reaction conditions                          |                 | Gas feed rate (sccm)                                                                                               |                                            |                                                          |                                                          |                                                     |                                                      |                |
|----------------------------------------------------------------------------------|------------------------|-----------------|----------------------------------------------|-----------------|--------------------------------------------------------------------------------------------------------------------|--------------------------------------------|----------------------------------------------------------|----------------------------------------------------------|-----------------------------------------------------|------------------------------------------------------|----------------|
| Name                                                                             | Conc.                  | (Unit)          | T <sub>0</sub> (°C)                          | 20.8            |                                                                                                                    | H <sub>2</sub>                             | O <sub>2</sub>                                           | N <sub>2</sub>                                           | Sum                                                 |                                                      |                |
| Ir-PVP                                                                           | 8.17                   | (mg/L)          | T (°C)                                       | 29.8            | Set                                                                                                                | 10.00                                      | 20.00                                                    | 20.00                                                    | 50.00                                               |                                                      |                |
|                                                                                  |                        |                 | P <sub>0</sub> (hPa)                         | 1006.4          | Calibrated                                                                                                         | 9.89                                       | 18.69                                                    | 19.82                                                    | 48.41                                               |                                                      |                |
| H <sub>2</sub> SO <sub>4</sub>                                                   | 0.01                   | (N)             | P (hPa)                                      | 1014.4          | Determination of final [H <sub>2</sub> O <sub>2</sub> ]                                                            | Sample (g)                                 | Absorbance (—)                                           | [H <sub>2</sub> O <sub>2</sub> ] (mmol L <sup>-1</sup> ) |                                                     |                                                      |                |
| NaBr                                                                             | 0.001                  | (N)             | Agitation (rpm)                              | 1204            |                                                                                                                    |                                            |                                                          |                                                          | 1.013                                               | 0.016                                                | 0.53           |
| Comment:<br>Catalyst activation: H <sub>2</sub> gas 20 sccm at 303 K for 40 min. |                        |                 |                                              |                 | Analysis of H <sub>2</sub> O <sub>2</sub> formation selectivity and H <sub>2</sub> O <sub>2</sub> destruction rate |                                            |                                                          | S <sub>f</sub> (—)                                       | 0.1375                                              |                                                      |                |
|                                                                                  |                        |                 |                                              |                 |                                                                                                                    |                                            |                                                          | k <sub>d</sub> [Cat] (h <sup>-1</sup> )                  | 0.2161                                              |                                                      |                |
|                                                                                  |                        |                 |                                              |                 |                                                                                                                    |                                            |                                                          | R <sup>2</sup>                                           | 0.9512                                              |                                                      |                |
| GC calibration                                                                   |                        | GC count        |                                              |                 | Ratio of sensitivity (toward N <sub>2</sub> )                                                                      |                                            | Feed gas measurement                                     |                                                          |                                                     |                                                      |                |
| Timing                                                                           | No.                    | H <sub>2</sub>  | O <sub>2</sub>                               | N <sub>2</sub>  | H <sub>2</sub>                                                                                                     | O <sub>2</sub>                             |                                                          |                                                          |                                                     |                                                      |                |
| Before reaction                                                                  | 1                      | 996922          | 200785                                       | 174004          | 0.0871                                                                                                             | 0.0871                                     | 0.818                                                    | T <sub>a</sub> (°C)                                      | 20.7                                                |                                                      |                |
|                                                                                  | 2                      | 996500          | 200673                                       | 174012          | 0.0872                                                                                                             |                                            |                                                          | P <sub>0</sub> (hPa)                                     | 1006.4                                              |                                                      |                |
|                                                                                  | 3                      | 996976          | 200780                                       | 173974          | 0.0871                                                                                                             |                                            |                                                          | Flow (cc/min)                                            |                                                     |                                                      |                |
| After reaction                                                                   | 4                      | 999161          | 200593                                       | 174086          | 0.0870                                                                                                             |                                            |                                                          | H <sub>2</sub>                                           | 10.98                                               |                                                      |                |
|                                                                                  | 5                      | 998063          | 200540                                       | 174138          | 0.0871                                                                                                             |                                            |                                                          | O <sub>2</sub>                                           | 20.74                                               |                                                      |                |
|                                                                                  | 6                      | 997632          | 200420                                       | 173923          | 0.0870                                                                                                             |                                            |                                                          | N <sub>2</sub>                                           | 22.00                                               |                                                      |                |
| Time                                                                             |                        |                 |                                              | GC count        |                                                                                                                    |                                            | t <sub>correct</sub> (min)                               | Outlet flow (sccm)                                       |                                                     | Conversion(%)                                        |                |
| H                                                                                | M                      | S               | min.                                         | H <sub>2</sub>  | O <sub>2</sub>                                                                                                     | N <sub>2</sub>                             |                                                          | H <sub>2</sub>                                           | O <sub>2</sub>                                      | H <sub>2</sub>                                       | O <sub>2</sub> |
| 15                                                                               | 23                     | 10              | 4.0                                          | 568472          | 123145                                                                                                             | 267227                                     | 0.00                                                     |                                                          | 17.46                                               | 21.83                                                | 6.59           |
| 15                                                                               | 33                     | 12              | 14.0                                         | 809411          | 192400                                                                                                             | 189483                                     | 9.70                                                     | 7.86                                                     | 17.54                                               | 20.51                                                | 6.16           |
| 15                                                                               | 43                     | 16              | 24.1                                         | 838255          | 197557                                                                                                             | 183033                                     | 19.77                                                    | 8.00                                                     | 17.62                                               | 19.13                                                | 5.71           |
| 15                                                                               | 53                     | 18              | 34.1                                         | 852772          | 197666                                                                                                             | 181039                                     | 29.80                                                    | 8.13                                                     | 17.70                                               | 17.83                                                | 5.30           |
| 16                                                                               | 3                      | 22              | 44.2                                         | 863215          | 197305                                                                                                             | 179643                                     | 39.87                                                    | 8.29                                                     | 17.80                                               | 16.17                                                | 4.73           |
| 16                                                                               | 13                     | 24              | 54.2                                         | 872252          | 197360                                                                                                             | 179028                                     | 49.90                                                    | 8.41                                                     | 17.87                                               | 15.00                                                | 4.38           |
| 16                                                                               | 23                     | 28              | 64.3                                         | 879998          | 197522                                                                                                             | 178595                                     | 59.97                                                    | 8.50                                                     | 17.93                                               | 14.04                                                | 4.07           |
| 16                                                                               | 33                     | 30              | 74.3                                         | 885337          | 197732                                                                                                             | 178506                                     | 70.00                                                    | 8.56                                                     | 17.96                                               | 13.48                                                | 3.92           |
| 16                                                                               | 43                     | 32              | 84.4                                         | 890060          | 197518                                                                                                             | 177942                                     | 80.03                                                    | 8.63                                                     | 17.99                                               | 12.74                                                | 3.72           |
| 16                                                                               | 53                     | 36              | 94.4                                         | 893977          | 197691                                                                                                             | 177749                                     | 90.10                                                    | 8.68                                                     | 18.03                                               | 12.26                                                | 3.53           |
| 17                                                                               | 3                      | 38              | 104.5                                        | 896849          | 197504                                                                                                             | 177437                                     | 100.13                                                   | 8.72                                                     | 18.04                                               | 11.82                                                | 3.45           |
| 17                                                                               | 13                     | 42              | 114.5                                        | 898922          | 197486                                                                                                             | 177296                                     | 110.20                                                   | 8.75                                                     | 18.06                                               | 11.55                                                | 3.39           |
| 17                                                                               | 23                     | 44              | 124.6                                        | 901751          | 197487                                                                                                             | 177346                                     | 120.23                                                   | 8.78                                                     | 18.05                                               | 11.30                                                | 3.41           |
| t <sub>correct</sub> (min)                                                       | Partial pressure (kPa) |                 | Rate (mmol L <sup>-1</sup> h <sup>-1</sup> ) |                 | d[H <sub>2</sub> O <sub>2</sub> ]/dt (mmol L <sup>-1</sup> h <sup>-1</sup> )                                       | Σ[H <sub>2</sub> ] (mmol L <sup>-1</sup> ) | [H <sub>2</sub> O <sub>2</sub> ] (mmol L <sup>-1</sup> ) | S <sub>e</sub> (—)                                       | Σ <sub>2</sub> [H <sub>2</sub> O <sub>2</sub> ] (h) | Σ <sub>1</sub> /[H <sub>2</sub> O <sub>2</sub> ] (—) |                |
|                                                                                  | P <sub>H2</sub>        | P <sub>O2</sub> | r <sub>H2</sub>                              | r <sub>O2</sub> |                                                                                                                    |                                            |                                                          |                                                          |                                                     |                                                      |                |
| 0.00                                                                             | 16.69                  | 37.68           | 19.28                                        | 10.99           | 2.70                                                                                                               | 0.00                                       | 0.00                                                     |                                                          | 0.000                                               | 0.000                                                |                |
| 9.70                                                                             | 16.90                  | 37.68           | 18.12                                        | 10.28           | 2.44                                                                                                               | 3.02                                       | 0.42                                                     | 0.14                                                     | 0.081                                               | 7.280                                                |                |
| 19.77                                                                            | 17.11                  | 37.68           | 16.90                                        | 9.53            | 2.16                                                                                                               | 5.96                                       | 0.80                                                     | 0.13                                                     | 0.169                                               | 7.441                                                |                |
| 29.80                                                                            | 17.31                  | 37.67           | 15.75                                        | 8.84            | 1.93                                                                                                               | 8.69                                       | 1.14                                                     | 0.13                                                     | 0.261                                               | 7.603                                                |                |
| 39.87                                                                            | 17.55                  | 37.68           | 14.29                                        | 7.90            | 1.51                                                                                                               | 11.21                                      | 1.43                                                     | 0.13                                                     | 0.359                                               | 7.829                                                |                |
| 49.90                                                                            | 17.73                  | 37.67           | 13.25                                        | 7.31            | 1.37                                                                                                               | 13.51                                      | 1.67                                                     | 0.12                                                     | 0.463                                               | 8.079                                                |                |
| 59.97                                                                            | 17.87                  | 37.67           | 12.40                                        | 6.79            | 1.18                                                                                                               | 15.67                                      | 1.89                                                     | 0.12                                                     | 0.569                                               | 8.306                                                |                |
| 70.00                                                                            | 17.95                  | 37.66           | 11.91                                        | 6.54            | 1.18                                                                                                               | 17.70                                      | 2.08                                                     | 0.12                                                     | 0.674                                               | 8.496                                                |                |
| 80.03                                                                            | 18.07                  | 37.65           | 11.25                                        | 6.21            | 1.16                                                                                                               | 19.64                                      | 2.28                                                     | 0.12                                                     | 0.776                                               | 8.616                                                |                |
| 90.10                                                                            | 18.13                  | 37.66           | 10.83                                        | 5.89            | 0.95                                                                                                               | 21.49                                      | 2.46                                                     | 0.11                                                     | 0.882                                               | 8.748                                                |                |
| 100.13                                                                           | 18.20                  | 37.64           | 10.45                                        | 5.76            | 1.08                                                                                                               | 23.27                                      | 2.63                                                     | 0.11                                                     | 0.987                                               | 8.859                                                |                |
| 110.20                                                                           | 18.24                  | 37.64           | 10.20                                        | 5.65            | 1.09                                                                                                               | 25.00                                      | 2.81                                                     | 0.11                                                     | 1.085                                               | 8.901                                                |                |
| 120.23                                                                           | 18.29                  | 37.61           | 9.98                                         | 5.69            | 1.41                                                                                                               | 26.69                                      | 3.02                                                     | 0.11                                                     | 1.171                                               | 8.844                                                |                |

## H<sub>2</sub>O<sub>2</sub> Synthesis Data Sheet

Entry No. 14 (Exp. T012) Employed in: Table 2 Fig. 9

| Catalyst, Additives                                                              |                        |                 | Reaction conditions                          |                 | Gas feed rate (sccm)                                                                                               |                                            |                                                          |                                                          |                                                     |                                                      |                |
|----------------------------------------------------------------------------------|------------------------|-----------------|----------------------------------------------|-----------------|--------------------------------------------------------------------------------------------------------------------|--------------------------------------------|----------------------------------------------------------|----------------------------------------------------------|-----------------------------------------------------|------------------------------------------------------|----------------|
| Name                                                                             | Conc.                  | (Unit)          | T <sub>0</sub> (°C)                          | 27.3            |                                                                                                                    | H <sub>2</sub>                             | O <sub>2</sub>                                           | N <sub>2</sub>                                           | Sum                                                 |                                                      |                |
| Pt-PVP                                                                           | 1.04                   | (mg/L)          | T (°C)                                       | 30.2            | Set                                                                                                                | 12.50                                      | 20.00                                                    | 17.50                                                    | 50.00                                               |                                                      |                |
|                                                                                  |                        |                 | P <sub>0</sub> (hPa)                         | 1012.2          | Calibrated                                                                                                         | 12.53                                      | 18.59                                                    | 17.50                                                    | 48.62                                               |                                                      |                |
|                                                                                  |                        |                 | P (hPa)                                      | 1019.1          | Determination of final [H <sub>2</sub> O <sub>2</sub> ]                                                            | Sample (g)                                 | Absorbance (—)                                           | [H <sub>2</sub> O <sub>2</sub> ] (mmol L <sup>-1</sup> ) |                                                     |                                                      |                |
|                                                                                  |                        |                 | Agitation (rpm)                              | 1199            |                                                                                                                    |                                            |                                                          |                                                          | 1.315                                               | 0.018                                                | 0.47           |
| Comment:<br>Catalyst activation: H <sub>2</sub> gas 20 sccm at 303 K for 40 min. |                        |                 |                                              |                 | Analysis of H <sub>2</sub> O <sub>2</sub> formation selectivity and H <sub>2</sub> O <sub>2</sub> destruction rate |                                            |                                                          | S <sub>f</sub> (—)                                       | 0.0416                                              |                                                      |                |
|                                                                                  |                        |                 |                                              |                 |                                                                                                                    |                                            |                                                          | k <sub>d</sub> [Cat] (h <sup>-1</sup> )                  | -0.0234                                             |                                                      |                |
|                                                                                  |                        |                 |                                              |                 |                                                                                                                    |                                            |                                                          | R <sup>2</sup>                                           | 0.4384                                              |                                                      |                |
| GC calibration                                                                   |                        | GC count        |                                              |                 | Ratio of sensitivity (toward N <sub>2</sub> )                                                                      |                                            | Feed gas measurement                                     |                                                          |                                                     |                                                      |                |
| Timing                                                                           | No.                    | H <sub>2</sub>  | O <sub>2</sub>                               | N <sub>2</sub>  | H <sub>2</sub>                                                                                                     | O <sub>2</sub>                             |                                                          |                                                          |                                                     |                                                      |                |
| Before reaction                                                                  | 1                      | 1252761         | 204639                                       | 156390          | 0.0893                                                                                                             | 0.0892                                     | 0.811                                                    | T <sub>a</sub> (°C)                                      | 26.7                                                |                                                      |                |
|                                                                                  | 2                      | 1252197         | 204881                                       | 156415          | 0.0894                                                                                                             |                                            |                                                          | 0.811                                                    | P <sub>0</sub> (hPa)                                | 1012.5                                               |                |
|                                                                                  | 3                      | 1251480         | 204979                                       | 156689          | 0.0896                                                                                                             |                                            |                                                          | 0.812                                                    | Flow (cc/min)                                       |                                                      |                |
| After reaction                                                                   | 4                      | 1255132         | 204502                                       | 156061          | 0.0890                                                                                                             |                                            |                                                          | 0.811                                                    | H <sub>2</sub>                                      | 14.25                                                |                |
|                                                                                  | 5                      | 1255064         | 204244                                       | 156133          | 0.0890                                                                                                             |                                            |                                                          | 0.812                                                    | O <sub>2</sub>                                      | 21.15                                                |                |
|                                                                                  | 6                      | 1255501         | 204650                                       | 156299          | 0.0891                                                                                                             |                                            |                                                          | 0.811                                                    | N <sub>2</sub>                                      | 19.91                                                |                |
| Time                                                                             |                        |                 |                                              | GC count        |                                                                                                                    |                                            | t <sub>correct</sub> (min)                               | Outlet flow (sccm)                                       |                                                     | Conversion(%)                                        |                |
| H                                                                                | M                      | S               | min.                                         | H <sub>2</sub>  | O <sub>2</sub>                                                                                                     | N <sub>2</sub>                             |                                                          | H <sub>2</sub>                                           | O <sub>2</sub>                                      | H <sub>2</sub>                                       | O <sub>2</sub> |
| 10                                                                               | 53                     | 16              | 4.0                                          | 652060          | 117398                                                                                                             | 269339                                     | 0.00                                                     | 7.31                                                     | 15.87                                               | 41.68                                                | 14.63          |
| 11                                                                               | 3                      | 18              | 14.0                                         | 826618          | 194301                                                                                                             | 190376                                     | 9.14                                                     | 7.40                                                     | 15.92                                               | 40.93                                                | 14.37          |
| 11                                                                               | 13                     | 22              | 24.1                                         | 858831          | 201859                                                                                                             | 181152                                     | 19.24                                                    | 7.50                                                     | 15.97                                               | 40.11                                                | 14.08          |
| 11                                                                               | 23                     | 24              | 34.1                                         | 872071          | 202242                                                                                                             | 179225                                     | 29.24                                                    | 7.60                                                     | 16.03                                               | 39.32                                                | 13.80          |
| 11                                                                               | 33                     | 28              | 44.2                                         | 880389          | 201777                                                                                                             | 178129                                     | 39.34                                                    | 7.72                                                     | 16.09                                               | 38.37                                                | 13.47          |
| 11                                                                               | 43                     | 30              | 54.2                                         | 887031          | 201561                                                                                                             | 177408                                     | 49.34                                                    | 7.81                                                     | 16.13                                               | 37.65                                                | 13.21          |
| 11                                                                               | 53                     | 34              | 64.3                                         | 891604          | 201418                                                                                                             | 176887                                     | 59.44                                                    | 7.87                                                     | 16.17                                               | 37.15                                                | 13.02          |
| 12                                                                               | 3                      | 36              | 74.3                                         | 895675          | 201244                                                                                                             | 176477                                     | 69.44                                                    | 7.93                                                     | 16.19                                               | 36.71                                                | 12.89          |
| 12                                                                               | 13                     | 38              | 84.4                                         | 898549          | 200930                                                                                                             | 176037                                     | 79.54                                                    | 7.97                                                     | 16.21                                               | 36.35                                                | 12.81          |
| 12                                                                               | 23                     | 42              | 94.4                                         | 901167          | 201095                                                                                                             | 175919                                     | 89.54                                                    | 8.00                                                     | 16.23                                               | 36.12                                                | 12.68          |
| 12                                                                               | 33                     | 44              | 104.5                                        | 903830          | 200775                                                                                                             | 175556                                     | 99.64                                                    | 8.04                                                     | 16.24                                               | 35.80                                                | 12.64          |
| 12                                                                               | 43                     | 48              | 114.5                                        | 906666          | 200830                                                                                                             | 175424                                     | 109.64                                                   | 8.07                                                     | 16.26                                               | 35.55                                                | 12.55          |
| 12                                                                               | 53                     | 50              | 124.6                                        | 908459          | 200760                                                                                                             | 175211                                     | 119.74                                                   | 8.10                                                     | 16.27                                               | 35.35                                                | 12.47          |
| t <sub>correct</sub> (min)                                                       | Partial pressure (kPa) |                 | Rate (mmol L <sup>-1</sup> h <sup>-1</sup> ) |                 | d[H <sub>2</sub> O <sub>2</sub> ]/dt (mmol L <sup>-1</sup> h <sup>-1</sup> )                                       | Σ[H <sub>2</sub> ] (mmol L <sup>-1</sup> ) | [H <sub>2</sub> O <sub>2</sub> ] (mmol L <sup>-1</sup> ) | S <sub>e</sub> (—)                                       | Σ <sub>2</sub> [H <sub>2</sub> O <sub>2</sub> ] (h) | Σ <sub>1</sub> /[H <sub>2</sub> O <sub>2</sub> ] (—) |                |
|                                                                                  | P <sub>H2</sub>        | P <sub>O2</sub> | r <sub>H2</sub>                              | r <sub>O2</sub> |                                                                                                                    |                                            |                                                          |                                                          |                                                     |                                                      |                |
| 0.00                                                                             | 17.54                  | 38.10           | 46.61                                        | 24.28           | 1.96                                                                                                               | 0.00                                       | 0.00                                                     |                                                          | 0.000                                               | 0.000                                                |                |
| 9.14                                                                             | 17.70                  | 38.09           | 45.78                                        | 23.85           | 1.92                                                                                                               | 7.04                                       | 0.30                                                     | 0.04                                                     | 0.076                                               | 23.793                                               |                |
| 19.24                                                                            | 17.88                  | 38.07           | 44.86                                        | 23.37           | 1.88                                                                                                               | 14.67                                      | 0.62                                                     | 0.04                                                     | 0.161                                               | 23.817                                               |                |
| 29.24                                                                            | 18.05                  | 38.06           | 43.98                                        | 22.91           | 1.83                                                                                                               | 22.07                                      | 0.93                                                     | 0.04                                                     | 0.246                                               | 23.855                                               |                |
| 39.34                                                                            | 18.25                  | 38.04           | 42.91                                        | 22.36           | 1.80                                                                                                               | 29.38                                      | 1.23                                                     | 0.04                                                     | 0.332                                               | 23.867                                               |                |
| 49.34                                                                            | 18.41                  | 38.03           | 42.11                                        | 21.93           | 1.75                                                                                                               | 36.47                                      | 1.53                                                     | 0.04                                                     | 0.418                                               | 23.885                                               |                |
| 59.44                                                                            | 18.51                  | 38.02           | 41.54                                        | 21.61           | 1.67                                                                                                               | 43.51                                      | 1.81                                                     | 0.04                                                     | 0.507                                               | 23.982                                               |                |
| 69.44                                                                            | 18.60                  | 38.01           | 41.06                                        | 21.40           | 1.73                                                                                                               | 50.39                                      | 2.10                                                     | 0.04                                                     | 0.594                                               | 24.023                                               |                |
| 79.54                                                                            | 18.68                  | 37.99           | 40.65                                        | 21.26           | 1.87                                                                                                               | 57.27                                      | 2.40                                                     | 0.04                                                     | 0.677                                               | 23.856                                               |                |
| 89.54                                                                            | 18.73                  | 38.00           | 40.40                                        | 21.04           | 1.69                                                                                                               | 64.02                                      | 2.70                                                     | 0.04                                                     | 0.760                                               | 23.739                                               |                |
| 99.64                                                                            | 18.80                  | 37.97           | 40.04                                        | 20.98           | 1.91                                                                                                               | 70.79                                      | 3.00                                                     | 0.04                                                     | 0.843                                               | 23.597                                               |                |
| 109.64                                                                           | 18.85                  | 37.97           | 39.76                                        | 20.83           | 1.89                                                                                                               | 77.44                                      | 3.32                                                     | 0.04                                                     | 0.921                                               | 23.345                                               |                |
| 119.74                                                                           | 18.89                  | 37.96           | 39.53                                        | 20.70           | 1.87                                                                                                               | 84.12                                      | 3.63                                                     | 0.04                                                     | 1.002                                               | 23.145                                               |                |

## H<sub>2</sub>O<sub>2</sub> Synthesis Data Sheet

Entry No. 15 (Exp. T028) Employed in: Table 2

| Catalyst, Additives                                                              |                        |                 | Reaction conditions                          |                 | Gas feed rate (sccm)                                                                                               |                                            |                                                          |                                                          |                                                     |                                                      |       |
|----------------------------------------------------------------------------------|------------------------|-----------------|----------------------------------------------|-----------------|--------------------------------------------------------------------------------------------------------------------|--------------------------------------------|----------------------------------------------------------|----------------------------------------------------------|-----------------------------------------------------|------------------------------------------------------|-------|
| Name                                                                             | Conc.                  | (Unit)          | T <sub>0</sub> (°C)                          | 27.0            |                                                                                                                    | H <sub>2</sub>                             | O <sub>2</sub>                                           | N <sub>2</sub>                                           | Sum                                                 |                                                      |       |
| Pt-PVP                                                                           | 1.04                   | (mg/L)          | T (°C)                                       | 30.2            | Set                                                                                                                | 10.00                                      | 20.00                                                    | 20.00                                                    | 50.00                                               |                                                      |       |
|                                                                                  |                        |                 | P <sub>0</sub> (hPa)                         | 1004.6          | Calibrated                                                                                                         | 10.09                                      | 19.33                                                    | 19.30                                                    | 48.73                                               |                                                      |       |
| H <sub>2</sub> SO <sub>4</sub>                                                   | 0.01                   | (N)             | P (hPa)                                      | 1011.6          | Determination of final [H <sub>2</sub> O <sub>2</sub> ]                                                            | Sample (g)                                 | Absorbance (—)                                           | [H <sub>2</sub> O <sub>2</sub> ] (mmol L <sup>-1</sup> ) |                                                     |                                                      |       |
| NaBr                                                                             | 0.001                  | (N)             | Agitation (rpm)                              | 1200            |                                                                                                                    |                                            |                                                          |                                                          | 1.686                                               | 0.259                                                | 5.30  |
| Comment:<br>Catalyst activation: H <sub>2</sub> gas 20 sccm at 303 K for 40 min. |                        |                 |                                              |                 | Analysis of H <sub>2</sub> O <sub>2</sub> formation selectivity and H <sub>2</sub> O <sub>2</sub> destruction rate |                                            |                                                          | S <sub>f</sub> (—)                                       | 0.1739                                              |                                                      |       |
|                                                                                  |                        |                 |                                              |                 |                                                                                                                    |                                            |                                                          | k <sub>d</sub> [Cat] (h <sup>-1</sup> )                  | 0.3479                                              |                                                      |       |
|                                                                                  |                        |                 |                                              |                 |                                                                                                                    |                                            |                                                          | R <sup>2</sup>                                           | 0.9978                                              |                                                      |       |
| GC calibration                                                                   |                        | GC count        |                                              |                 | Ratio of sensitivity (toward N <sub>2</sub> )                                                                      |                                            | Feed gas measurement                                     |                                                          |                                                     |                                                      |       |
| Timing                                                                           | No.                    | H <sub>2</sub>  | O <sub>2</sub>                               | N <sub>2</sub>  | H <sub>2</sub>                                                                                                     | O <sub>2</sub>                             |                                                          |                                                          |                                                     |                                                      |       |
| Before reaction                                                                  | 1                      | 998058          | 200826                                       | 176724          | 0.0926                                                                                                             | 0.0923                                     | 0.881                                                    | T <sub>a</sub> (°C)                                      | 27.3                                                |                                                      |       |
|                                                                                  | 2                      | 998170          | 200564                                       | 176434          | 0.0924                                                                                                             |                                            |                                                          | 0.881                                                    | P <sub>0</sub> (hPa)                                | 1003.9                                               |       |
|                                                                                  | 3                      | 997827          | 200458                                       | 176387          | 0.0924                                                                                                             |                                            |                                                          | 0.881                                                    | Flow (cc/min)                                       |                                                      |       |
| After reaction                                                                   | 4                      | 995137          | 199175                                       | 175394          | 0.0921                                                                                                             |                                            |                                                          | 0.882                                                    | H <sub>2</sub>                                      | 11.62                                                |       |
|                                                                                  | 5                      | 996669          | 199389                                       | 175507          | 0.0920                                                                                                             |                                            |                                                          | 0.881                                                    | O <sub>2</sub>                                      | 22.26                                                |       |
|                                                                                  | 6                      | 996476          | 199293                                       | 175418          | 0.0920                                                                                                             |                                            |                                                          | 0.881                                                    | N <sub>2</sub>                                      | 22.23                                                |       |
| Time                                                                             |                        | GC count        |                                              |                 | t <sub>correct</sub> (min)                                                                                         | Outlet flow (sccm)                         |                                                          | Conversion(%)                                            |                                                     |                                                      |       |
| H                                                                                | M                      | S               | min.                                         | H <sub>2</sub>  |                                                                                                                    | O <sub>2</sub>                             | N <sub>2</sub>                                           | H <sub>2</sub>                                           | O <sub>2</sub>                                      |                                                      |       |
| 17                                                                               | 12                     | 2               | 4.0                                          | 449874          | 117752                                                                                                             | 277913                                     | 0.00                                                     | 5.41                                                     | 16.58                                               | 46.42                                                | 14.23 |
| 17                                                                               | 22                     | 6               | 14.1                                         | 579386          | 188225                                                                                                             | 207894                                     | 9.28                                                     | 5.42                                                     | 16.61                                               | 46.28                                                | 14.08 |
| 17                                                                               | 32                     | 8               | 24.1                                         | 600113          | 194487                                                                                                             | 200524                                     | 19.31                                                    | 5.44                                                     | 16.64                                               | 46.14                                                | 13.92 |
| 17                                                                               | 42                     | 12              | 34.2                                         | 609354          | 195309                                                                                                             | 199354                                     | 29.38                                                    | 5.44                                                     | 16.67                                               | 46.05                                                | 13.78 |
| 17                                                                               | 52                     | 14              | 44.2                                         | 610675          | 195022                                                                                                             | 198555                                     | 39.41                                                    | 5.48                                                     | 16.71                                               | 45.72                                                | 13.56 |
| 18                                                                               | 2                      | 18              | 54.3                                         | 609714          | 195093                                                                                                             | 198383                                     | 49.48                                                    | 5.47                                                     | 16.73                                               | 45.76                                                | 13.45 |
| 18                                                                               | 12                     | 20              | 64.3                                         | 608769          | 195230                                                                                                             | 198504                                     | 59.51                                                    | 5.46                                                     | 16.73                                               | 45.87                                                | 13.44 |
| 18                                                                               | 22                     | 24              | 74.4                                         | 606211          | 195304                                                                                                             | 198559                                     | 69.58                                                    | 5.44                                                     | 16.73                                               | 46.11                                                | 13.43 |
| 18                                                                               | 32                     | 26              | 84.4                                         | 604625          | 195570                                                                                                             | 198804                                     | 79.61                                                    | 5.42                                                     | 16.74                                               | 46.32                                                | 13.42 |
| 18                                                                               | 42                     | 28              | 94.4                                         | 602168          | 195648                                                                                                             | 198921                                     | 89.65                                                    | 5.39                                                     | 16.73                                               | 46.57                                                | 13.44 |
| 18                                                                               | 52                     | 32              | 104.5                                        | 599912          | 195344                                                                                                             | 198695                                     | 99.71                                                    | 5.38                                                     | 16.73                                               | 46.71                                                | 13.47 |
| 19                                                                               | 2                      | 34              | 114.5                                        | 596488          | 195320                                                                                                             | 198783                                     | 109.75                                                   | 5.34                                                     | 16.72                                               | 47.04                                                | 13.52 |
| 19                                                                               | 12                     | 38              | 124.6                                        | 597623          | 195367                                                                                                             | 198681                                     | 119.81                                                   | 5.36                                                     | 16.73                                               | 46.91                                                | 13.46 |
| t <sub>correct</sub> (min)                                                       | Partial pressure (kPa) |                 | Rate (mmol L <sup>-1</sup> h <sup>-1</sup> ) |                 | d[H <sub>2</sub> O <sub>2</sub> ]/dt (mmol L <sup>-1</sup> h <sup>-1</sup> )                                       | Σ[H <sub>2</sub> ] (mmol L <sup>-1</sup> ) | [H <sub>2</sub> O <sub>2</sub> ] (mmol L <sup>-1</sup> ) | S <sub>e</sub> (—)                                       | Σ <sub>2</sub> [H <sub>2</sub> O <sub>2</sub> ] (h) | Σ <sub>1</sub> /[H <sub>2</sub> O <sub>2</sub> ] (—) |       |
|                                                                                  | P <sub>H2</sub>        | P <sub>O2</sub> | r <sub>H2</sub>                              | r <sub>O2</sub> |                                                                                                                    |                                            |                                                          |                                                          |                                                     |                                                      |       |
| 0.00                                                                             | 12.69                  | 38.91           | 41.82                                        | 24.56           | 7.30                                                                                                               | 0.00                                       | 0.00                                                     |                                                          | 0.000                                               | 0.000                                                |       |
| 9.28                                                                             | 12.71                  | 38.94           | 41.70                                        | 24.30           | 6.91                                                                                                               | 6.46                                       | 1.10                                                     | 0.17                                                     | 0.077                                               | 5.879                                                |       |
| 19.31                                                                            | 12.73                  | 38.97           | 41.57                                        | 24.02           | 6.48                                                                                                               | 13.42                                      | 2.22                                                     | 0.17                                                     | 0.163                                               | 6.051                                                |       |
| 29.38                                                                            | 12.74                  | 39.00           | 41.49                                        | 23.78           | 6.06                                                                                                               | 20.39                                      | 3.27                                                     | 0.16                                                     | 0.252                                               | 6.235                                                |       |
| 39.41                                                                            | 12.79                  | 39.03           | 41.19                                        | 23.40           | 5.60                                                                                                               | 27.30                                      | 4.25                                                     | 0.16                                                     | 0.342                                               | 6.431                                                |       |
| 49.48                                                                            | 12.78                  | 39.06           | 41.22                                        | 23.21           | 5.20                                                                                                               | 34.21                                      | 5.15                                                     | 0.15                                                     | 0.435                                               | 6.641                                                |       |
| 59.51                                                                            | 12.76                  | 39.08           | 41.33                                        | 23.20           | 5.07                                                                                                               | 41.12                                      | 6.01                                                     | 0.15                                                     | 0.528                                               | 6.841                                                |       |
| 69.58                                                                            | 12.71                  | 39.10           | 41.55                                        | 23.18           | 4.82                                                                                                               | 48.07                                      | 6.84                                                     | 0.14                                                     | 0.621                                               | 7.028                                                |       |
| 79.61                                                                            | 12.66                  | 39.13           | 41.73                                        | 23.16           | 4.59                                                                                                               | 55.03                                      | 7.63                                                     | 0.14                                                     | 0.716                                               | 7.216                                                |       |
| 89.65                                                                            | 12.61                  | 39.14           | 41.96                                        | 23.19           | 4.43                                                                                                               | 62.03                                      | 8.38                                                     | 0.14                                                     | 0.811                                               | 7.401                                                |       |
| 99.71                                                                            | 12.59                  | 39.15           | 42.08                                        | 23.26           | 4.43                                                                                                               | 69.08                                      | 9.12                                                     | 0.13                                                     | 0.906                                               | 7.572                                                |       |
| 109.75                                                                           | 12.52                  | 39.17           | 42.38                                        | 23.34           | 4.30                                                                                                               | 76.14                                      | 9.85                                                     | 0.13                                                     | 1.000                                               | 7.728                                                |       |
| 119.81                                                                           | 12.54                  | 39.17           | 42.26                                        | 23.23           | 4.19                                                                                                               | 83.24                                      | 10.57                                                    | 0.13                                                     | 1.095                                               | 7.879                                                |       |



## H<sub>2</sub>O<sub>2</sub> Synthesis Data Sheet

Entry No. 16 (Exp. T077) Employed in: Table 2

| Catalyst, Additives                                                                                                                            |                        |                 | Reaction conditions                          |                 | Gas feed rate (sccm)                                                                                               |                                            |                                                          |                                                          |                                                     |                                                      |       |
|------------------------------------------------------------------------------------------------------------------------------------------------|------------------------|-----------------|----------------------------------------------|-----------------|--------------------------------------------------------------------------------------------------------------------|--------------------------------------------|----------------------------------------------------------|----------------------------------------------------------|-----------------------------------------------------|------------------------------------------------------|-------|
| Name                                                                                                                                           | Conc.                  | (Unit)          | T <sub>0</sub> (°C)                          | 27.7            |                                                                                                                    | H <sub>2</sub>                             | O <sub>2</sub>                                           | N <sub>2</sub>                                           | Sum                                                 |                                                      |       |
| Au-PVP                                                                                                                                         | 8.33                   | (mg/L)          | T (°C)                                       | 30.0            | Set                                                                                                                | 10.00                                      | 20.00                                                    | 20.00                                                    | 50.00                                               |                                                      |       |
|                                                                                                                                                |                        |                 | P <sub>0</sub> (hPa)                         | 1005.2          | Calibrated                                                                                                         | 10.11                                      | 18.24                                                    | 20.23                                                    | 48.58                                               |                                                      |       |
|                                                                                                                                                |                        |                 | P (hPa)                                      | 1013.0          | Determination of final [H <sub>2</sub> O <sub>2</sub> ]                                                            | Sample (g)                                 | Absorbance (—)                                           | [H <sub>2</sub> O <sub>2</sub> ] (mmol L <sup>-1</sup> ) |                                                     |                                                      |       |
|                                                                                                                                                |                        |                 | Agitation (rpm)                              | 1201            |                                                                                                                    |                                            |                                                          |                                                          | 1.706                                               | 0.019                                                | 0.38  |
| Comment:<br>Catalyst activation: H <sub>2</sub> gas 20 sccm at 303 K for 40 min.<br>Unsteady deactivation at early stage. Deleted from Fig. 2. |                        |                 |                                              |                 | Analysis of H <sub>2</sub> O <sub>2</sub> formation selectivity and H <sub>2</sub> O <sub>2</sub> destruction rate |                                            |                                                          | S <sub>f</sub> (—)                                       | 2.4588                                              |                                                      |       |
|                                                                                                                                                |                        |                 |                                              |                 |                                                                                                                    |                                            |                                                          | k <sub>d</sub> [Cat] (h <sup>-1</sup> )                  | 0.2874                                              |                                                      |       |
|                                                                                                                                                |                        |                 |                                              |                 |                                                                                                                    |                                            |                                                          | R <sup>2</sup>                                           | 0.9974                                              |                                                      |       |
| GC calibration                                                                                                                                 |                        | GC count        |                                              |                 | Ratio of sensitivity (toward N <sub>2</sub> )                                                                      |                                            | Feed gas measurement                                     |                                                          |                                                     |                                                      |       |
| Timing                                                                                                                                         | No.                    | H <sub>2</sub>  | O <sub>2</sub>                               | N <sub>2</sub>  | H <sub>2</sub>                                                                                                     | O <sub>2</sub>                             |                                                          |                                                          |                                                     |                                                      |       |
| Before reaction                                                                                                                                | 1                      | 973343          | 193125                                       | 172933          | 0.0888                                                                                                             | 0.0888                                     | 0.807                                                    | T <sub>a</sub> (°C)                                      | 29.2                                                |                                                      |       |
|                                                                                                                                                | 2                      | 973929          | 193093                                       | 173075          | 0.0888                                                                                                             |                                            |                                                          | 0.808                                                    | P <sub>0</sub> (hPa)                                | 1007.0                                               |       |
|                                                                                                                                                | 3                      | 974150          | 193140                                       | 173042          | 0.0888                                                                                                             |                                            |                                                          | 0.808                                                    | Flow (cc/min)                                       |                                                      |       |
| After reaction                                                                                                                                 | 4                      | 978115          | 193973                                       | 173554          | 0.0887                                                                                                             | 0.0887                                     | 0.807                                                    | H <sub>2</sub>                                           | 11.73                                               |                                                      |       |
|                                                                                                                                                | 5                      | 977654          | 193879                                       | 173445          | 0.0887                                                                                                             |                                            |                                                          | 0.807                                                    | O <sub>2</sub>                                      | 21.16                                                |       |
|                                                                                                                                                | 6                      | 977045          | 193898                                       | 173554          | 0.0888                                                                                                             |                                            |                                                          | 0.807                                                    | N <sub>2</sub>                                      | 23.47                                                |       |
| Time                                                                                                                                           |                        | GC count        |                                              |                 | t <sub>correct</sub> (min)                                                                                         | Outlet flow (sccm)                         |                                                          | Conversion(%)                                            |                                                     |                                                      |       |
| H                                                                                                                                              | M                      | S               | min.                                         | H <sub>2</sub>  |                                                                                                                    | O <sub>2</sub>                             | N <sub>2</sub>                                           | H <sub>2</sub>                                           | O <sub>2</sub>                                      |                                                      |       |
| 16                                                                                                                                             | 10                     | 38              | 4.0                                          | 703385          | 119786                                                                                                             | 245660                                     | 0.00                                                     | 7.78                                                     | 14.30                                               | 23.01                                                | 21.62 |
| 16                                                                                                                                             | 20                     | 40              | 14.0                                         | 915094          | 183661                                                                                                             | 174590                                     | 9.67                                                     | 8.17                                                     | 15.00                                               | 19.22                                                | 17.73 |
| 16                                                                                                                                             | 30                     | 44              | 24.1                                         | 927314          | 187450                                                                                                             | 169878                                     | 19.73                                                    | 8.59                                                     | 15.78                                               | 15.05                                                | 13.46 |
| 16                                                                                                                                             | 40                     | 46              | 34.1                                         | 929783          | 187905                                                                                                             | 187905                                     | 29.77                                                    | 8.88                                                     | 16.33                                               | 12.13                                                | 10.46 |
| 16                                                                                                                                             | 50                     | 50              | 44.2                                         | 928738          | 187740                                                                                                             | 169696                                     | 39.83                                                    | 9.83                                                     | 18.07                                               | 2.81                                                 | 0.94  |
| 17                                                                                                                                             | 0                      | 52              | 54.2                                         | 928864          | 187809                                                                                                             | 169586                                     | 49.87                                                    | 9.83                                                     | 18.08                                               | 2.73                                                 | 0.84  |
| 17                                                                                                                                             | 10                     | 56              | 64.3                                         | 929218          | 187787                                                                                                             | 169634                                     | 59.93                                                    | 9.83                                                     | 18.08                                               | 2.72                                                 | 0.88  |
| 17                                                                                                                                             | 20                     | 58              | 74.3                                         | 929259          | 187996                                                                                                             | 169787                                     | 69.97                                                    | 9.83                                                     | 18.08                                               | 2.81                                                 | 0.86  |
| 17                                                                                                                                             | 31                     | 2               | 84.4                                         | 927705          | 187681                                                                                                             | 169498                                     | 80.03                                                    | 9.83                                                     | 18.08                                               | 2.81                                                 | 0.86  |
| 17                                                                                                                                             | 41                     | 4               | 94.4                                         | 927417          | 187727                                                                                                             | 169513                                     | 90.07                                                    | 9.82                                                     | 18.08                                               | 2.84                                                 | 0.84  |
| 17                                                                                                                                             | 51                     | 8               | 104.5                                        | 925840          | 187368                                                                                                             | 169188                                     | 100.13                                                   | 9.82                                                     | 18.08                                               | 2.82                                                 | 0.84  |
| 18                                                                                                                                             | 1                      | 10              | 114.5                                        | 925440          | 187377                                                                                                             | 169110                                     | 110.17                                                   | 9.83                                                     | 18.09                                               | 2.82                                                 | 0.79  |
| 18                                                                                                                                             | 11                     | 14              | 124.6                                        | 928342          | 187730                                                                                                             | 169244                                     | 120.23                                                   | 9.85                                                     | 18.11                                               | 2.59                                                 | 0.68  |
| t <sub>correct</sub> (min)                                                                                                                     | Partial pressure (kPa) |                 | Rate (mmol L <sup>-1</sup> h <sup>-1</sup> ) |                 | d[H <sub>2</sub> O <sub>2</sub> ]/dt (mmol L <sup>-1</sup> h <sup>-1</sup> )                                       | Σ[H <sub>2</sub> ] (mmol L <sup>-1</sup> ) | [H <sub>2</sub> O <sub>2</sub> ] (mmol L <sup>-1</sup> ) | S <sub>f</sub> (—)                                       | Σ <sub>2</sub> [H <sub>2</sub> O <sub>2</sub> ] (h) | Σ <sub>1</sub> /[H <sub>2</sub> O <sub>2</sub> ] (—) |       |
|                                                                                                                                                | P <sub>H2</sub>        | P <sub>O2</sub> | r <sub>H2</sub>                              | r <sub>O2</sub> |                                                                                                                    |                                            |                                                          |                                                          |                                                     |                                                      |       |
| 0.00                                                                                                                                           | 17.84                  | 32.77           | 20.77                                        | 35.20           | 49.62                                                                                                              | 0.00                                       | 0.00                                                     |                                                          | 0.000                                               | 0.000                                                |       |
| 9.67                                                                                                                                           | 18.26                  | 33.54           | 17.35                                        | 28.87           | 40.39                                                                                                              | 3.07                                       | 7.25                                                     | 2.36                                                     | 0.081                                               | 0.424                                                |       |
| 19.73                                                                                                                                          | 18.69                  | 34.34           | 13.59                                        | 21.93           | 30.26                                                                                                              | 5.67                                       | 13.18                                                    | 2.33                                                     | 0.174                                               | 0.430                                                |       |
| 29.77                                                                                                                                          | 18.97                  | 34.88           | 10.95                                        | 17.04           | 23.13                                                                                                              | 7.72                                       | 17.64                                                    | 2.29                                                     | 0.276                                               | 0.437                                                |       |
| 39.83                                                                                                                                          | 19.83                  | 36.46           | 2.54                                         | 1.54            | 0.54                                                                                                               | 8.85                                       | 19.63                                                    | 2.22                                                     | 0.408                                               | 0.451                                                |       |
| 49.87                                                                                                                                          | 19.83                  | 36.47           | 2.47                                         | 1.37            | 0.28                                                                                                               | 9.27                                       | 19.70                                                    | 2.13                                                     | 0.573                                               | 0.471                                                |       |
| 59.93                                                                                                                                          | 19.84                  | 36.47           | 2.46                                         | 1.44            | 0.42                                                                                                               | 9.68                                       | 19.76                                                    | 2.04                                                     | 0.739                                               | 0.490                                                |       |
| 69.97                                                                                                                                          | 19.82                  | 36.48           | 2.53                                         | 1.40            | 0.27                                                                                                               | 10.10                                      | 19.81                                                    | 1.96                                                     | 0.904                                               | 0.510                                                |       |
| 80.03                                                                                                                                          | 19.82                  | 36.48           | 2.53                                         | 1.40            | 0.27                                                                                                               | 10.52                                      | 19.86                                                    | 1.89                                                     | 1.069                                               | 0.530                                                |       |
| 90.07                                                                                                                                          | 19.82                  | 36.48           | 2.57                                         | 1.37            | 0.18                                                                                                               | 10.95                                      | 19.90                                                    | 1.82                                                     | 1.234                                               | 0.550                                                |       |
| 100.13                                                                                                                                         | 19.82                  | 36.48           | 2.55                                         | 1.37            | 0.20                                                                                                               | 11.38                                      | 19.93                                                    | 1.75                                                     | 1.400                                               | 0.571                                                |       |
| 110.17                                                                                                                                         | 19.82                  | 36.49           | 2.55                                         | 1.29            | 0.04                                                                                                               | 11.81                                      | 19.95                                                    | 1.69                                                     | 1.566                                               | 0.592                                                |       |
| 120.23                                                                                                                                         | 19.85                  | 36.50           | 2.34                                         | 1.12            | -0.11                                                                                                              | 12.22                                      | 19.94                                                    | 1.63                                                     | 1.734                                               | 0.613                                                |       |

## H<sub>2</sub>O<sub>2</sub> Synthesis Data Sheet

Entry No. 17 (Exp. T076) Employed in: Table 2

| Catalyst, Additives                                                              |                        |                 | Reaction conditions                          |                 | Gas feed rate (sccm)                                                                                               |                                            |                                                          |                                                          |                                                     |                                                      |      |
|----------------------------------------------------------------------------------|------------------------|-----------------|----------------------------------------------|-----------------|--------------------------------------------------------------------------------------------------------------------|--------------------------------------------|----------------------------------------------------------|----------------------------------------------------------|-----------------------------------------------------|------------------------------------------------------|------|
| Name                                                                             | Conc.                  | (Unit)          | T <sub>0</sub> (°C)                          | 29.1            |                                                                                                                    | H <sub>2</sub>                             | O <sub>2</sub>                                           | N <sub>2</sub>                                           | Sum                                                 |                                                      |      |
| Au-PVP                                                                           | 8.33                   | (mg/L)          | T (°C)                                       | 30.1            | Set                                                                                                                | 10.00                                      | 20.00                                                    | 20.00                                                    | 50.00                                               |                                                      |      |
|                                                                                  |                        |                 | P <sub>0</sub> (hPa)                         | 1006.1          | Calibrated                                                                                                         | 10.11                                      | 18.24                                                    | 20.23                                                    | 48.58                                               |                                                      |      |
| H <sub>2</sub> SO <sub>4</sub>                                                   | 0.01                   | (N)             | P (hPa)                                      | 1014.4          | Determination of final [H <sub>2</sub> O <sub>2</sub> ]                                                            | Sample (g)                                 | Absorbance (—)                                           | [H <sub>2</sub> O <sub>2</sub> ] (mmol L <sup>-1</sup> ) |                                                     |                                                      |      |
| NaBr                                                                             | 0.001                  | (N)             | Agitation (rpm)                              | 1203            |                                                                                                                    |                                            |                                                          |                                                          | 1.704                                               | 0.061                                                | 1.23 |
| Comment:<br>Catalyst activation: H <sub>2</sub> gas 20 sccm at 303 K for 40 min. |                        |                 |                                              |                 | Analysis of H <sub>2</sub> O <sub>2</sub> formation selectivity and H <sub>2</sub> O <sub>2</sub> destruction rate |                                            |                                                          | S <sub>f</sub> (—)                                       | -0.2610                                             |                                                      |      |
|                                                                                  |                        |                 |                                              |                 |                                                                                                                    |                                            |                                                          | k <sub>d</sub> [Cat] (h <sup>-1</sup> )                  | -0.5781                                             |                                                      |      |
|                                                                                  |                        |                 |                                              |                 |                                                                                                                    |                                            |                                                          | R <sup>2</sup>                                           | 0.9814                                              |                                                      |      |
| GC calibration                                                                   |                        | GC count        |                                              |                 | Ratio of sensitivity (toward N <sub>2</sub> )                                                                      |                                            | Feed gas measurement                                     |                                                          |                                                     |                                                      |      |
| Timing                                                                           | No.                    | H <sub>2</sub>  | O <sub>2</sub>                               | N <sub>2</sub>  | H <sub>2</sub>                                                                                                     | O <sub>2</sub>                             |                                                          |                                                          |                                                     |                                                      |      |
| Before reaction                                                                  | 1                      | 981158          | 194898                                       | 175181          | 0.0892                                                                                                             | 0.0890                                     | 0.814                                                    | T <sub>a</sub> (°C)                                      | 29.2                                                |                                                      |      |
|                                                                                  | 2                      | 977883          | 186483                                       | 174220          | 0.0890                                                                                                             |                                            |                                                          | P <sub>0</sub> (hPa)                                     | 1007.0                                              |                                                      |      |
|                                                                                  | 3                      | 979394          | 194472                                       | 174623          | 0.0891                                                                                                             |                                            |                                                          | Flow (cc/min)                                            |                                                     |                                                      |      |
| After reaction                                                                   | 4                      | 973343          | 193125                                       | 172933          | 0.0888                                                                                                             | 0.0807                                     | 0.808                                                    | H <sub>2</sub>                                           | 11.73                                               |                                                      |      |
|                                                                                  | 5                      | 973929          | 193093                                       | 173075          | 0.0888                                                                                                             |                                            |                                                          | O <sub>2</sub>                                           | 21.16                                               |                                                      |      |
|                                                                                  | 6                      | 974150          | 193140                                       | 173042          | 0.0888                                                                                                             |                                            |                                                          | N <sub>2</sub>                                           | 23.47                                               |                                                      |      |
| Time                                                                             |                        | GC count        |                                              |                 | t <sub>correct</sub> (min)                                                                                         | Outlet flow (sccm)                         |                                                          | Conversion(%)                                            |                                                     |                                                      |      |
| H                                                                                | M                      | S               | min.                                         | H <sub>2</sub>  |                                                                                                                    | O <sub>2</sub>                             | N <sub>2</sub>                                           | H <sub>2</sub>                                           | O <sub>2</sub>                                      |                                                      |      |
| 12                                                                               | 40                     | 46              | 4.0                                          | 642728          | 120737                                                                                                             | 250516                                     | 0.00                                                     | 9.69                                                     | 18.08                                               | 4.17                                                 | 0.86 |
| 12                                                                               | 50                     | 48              | 14.0                                         | 902565          | 182791                                                                                                             | 175013                                     | 9.90                                                     | 9.71                                                     | 18.09                                               | 3.98                                                 | 0.79 |
| 13                                                                               | 0                      | 52              | 24.1                                         | 917254          | 186502                                                                                                             | 170093                                     | 19.97                                                    | 9.73                                                     | 18.11                                               | 3.78                                                 | 0.71 |
| 13                                                                               | 10                     | 54              | 34.1                                         | 918679          | 186590                                                                                                             | 169600                                     | 30.00                                                    | 9.75                                                     | 18.12                                               | 3.58                                                 | 0.64 |
| 13                                                                               | 20                     | 58              | 44.2                                         | 919109          | 186432                                                                                                             | 169327                                     | 40.07                                                    | 9.77                                                     | 18.14                                               | 3.38                                                 | 0.56 |
| 13                                                                               | 31                     | 0               | 54.2                                         | 921122          | 186594                                                                                                             | 169351                                     | 50.10                                                    | 9.79                                                     | 18.15                                               | 3.18                                                 | 0.49 |
| 13                                                                               | 41                     | 2               | 64.3                                         | 920323          | 186407                                                                                                             | 168945                                     | 60.14                                                    | 9.80                                                     | 18.17                                               | 3.03                                                 | 0.35 |
| 13                                                                               | 51                     | 6               | 74.3                                         | 921140          | 186705                                                                                                             | 169161                                     | 70.20                                                    | 9.80                                                     | 18.18                                               | 3.07                                                 | 0.32 |
| 14                                                                               | 1                      | 8               | 84.4                                         | 921325          | 186740                                                                                                             | 169140                                     | 80.24                                                    | 9.80                                                     | 18.19                                               | 3.04                                                 | 0.29 |
| 14                                                                               | 11                     | 12              | 94.4                                         | 921747          | 186753                                                                                                             | 169173                                     | 90.30                                                    | 9.81                                                     | 18.18                                               | 3.01                                                 | 0.30 |
| 14                                                                               | 21                     | 14              | 104.5                                        | 919035          | 186062                                                                                                             | 168593                                     | 100.34                                                   | 9.81                                                     | 18.18                                               | 2.97                                                 | 0.33 |
| 14                                                                               | 31                     | 18              | 114.5                                        | 920460          | 186414                                                                                                             | 168613                                     | 110.40                                                   | 9.82                                                     | 18.21                                               | 2.83                                                 | 0.15 |
| 14                                                                               | 41                     | 20              | 124.6                                        | 922171          | 186758                                                                                                             | 169143                                     | 120.44                                                   | 9.81                                                     | 18.19                                               | 2.95                                                 | 0.28 |
| t <sub>correct</sub> (min)                                                       | Partial pressure (kPa) |                 | Rate (mmol L <sup>-1</sup> h <sup>-1</sup> ) |                 | d[H <sub>2</sub> O <sub>2</sub> ]/dt (mmol L <sup>-1</sup> h <sup>-1</sup> )                                       | Σ[H <sub>2</sub> ] (mmol L <sup>-1</sup> ) | [H <sub>2</sub> O <sub>2</sub> ] (mmol L <sup>-1</sup> ) | S <sub>e</sub> (—)                                       | Σ <sub>2</sub> [H <sub>2</sub> O <sub>2</sub> ] (h) | Σ <sub>1</sub> /[H <sub>2</sub> O <sub>2</sub> ] (—) |      |
|                                                                                  | P <sub>H2</sub>        | P <sub>O2</sub> | r <sub>H2</sub>                              | r <sub>O2</sub> |                                                                                                                    |                                            |                                                          |                                                          |                                                     |                                                      |      |
| 0.00                                                                             | 19.62                  | 36.61           | 3.77                                         | 1.40            | -0.96                                                                                                              | 0.00                                       | 0.00                                                     |                                                          | 0.000                                               | 0.000                                                |      |
| 9.90                                                                             | 19.65                  | 36.62           | 3.59                                         | 1.28            | -1.02                                                                                                              | 0.61                                       | -0.16                                                    | -0.27                                                    | 0.083                                               | -3.700                                               |      |
| 19.97                                                                            | 19.67                  | 36.62           | 3.41                                         | 1.16            | -1.09                                                                                                              | 1.19                                       | -0.34                                                    | -0.29                                                    | 0.164                                               | -3.502                                               |      |
| 30.00                                                                            | 19.70                  | 36.62           | 3.23                                         | 1.04            | -1.15                                                                                                              | 1.75                                       | -0.53                                                    | -0.30                                                    | 0.244                                               | -3.316                                               |      |
| 40.07                                                                            | 19.73                  | 36.62           | 3.05                                         | 0.92            | -1.21                                                                                                              | 2.28                                       | -0.73                                                    | -0.32                                                    | 0.322                                               | -3.139                                               |      |
| 50.10                                                                            | 19.75                  | 36.62           | 2.87                                         | 0.80            | -1.27                                                                                                              | 2.77                                       | -0.93                                                    | -0.34                                                    | 0.399                                               | -2.972                                               |      |
| 60.14                                                                            | 19.77                  | 36.64           | 2.74                                         | 0.58            | -1.59                                                                                                              | 3.24                                       | -1.17                                                    | -0.36                                                    | 0.468                                               | -2.767                                               |      |
| 70.20                                                                            | 19.76                  | 36.65           | 2.77                                         | 0.52            | -1.73                                                                                                              | 3.70                                       | -1.45                                                    | -0.39                                                    | 0.530                                               | -2.555                                               |      |
| 80.24                                                                            | 19.76                  | 36.66           | 2.74                                         | 0.47            | -1.80                                                                                                              | 4.17                                       | -1.74                                                    | -0.42                                                    | 0.594                                               | -2.388                                               |      |
| 90.30                                                                            | 19.77                  | 36.65           | 2.72                                         | 0.49            | -1.73                                                                                                              | 4.62                                       | -2.04                                                    | -0.44                                                    | 0.663                                               | -2.266                                               |      |
| 100.34                                                                           | 19.78                  | 36.64           | 2.68                                         | 0.54            | -1.60                                                                                                              | 5.08                                       | -2.32                                                    | -0.46                                                    | 0.740                                               | -2.188                                               |      |
| 110.40                                                                           | 19.79                  | 36.68           | 2.55                                         | 0.25            | -2.05                                                                                                              | 5.51                                       | -2.63                                                    | -0.48                                                    | 0.812                                               | -2.099                                               |      |
| 120.44                                                                           | 19.78                  | 36.65           | 2.67                                         | 0.46            | -1.75                                                                                                              | 5.95                                       | -2.94                                                    | -0.49                                                    | 0.882                                               | -2.021                                               |      |

## H<sub>2</sub>O<sub>2</sub> Synthesis Data Sheet

Entry No. 18 (Exp. T341) Employed in: Table 3 Fig. 6

| Catalyst, Additives                                                              |                        |                 | Reaction conditions                          |                 | Gas feed rate (sccm)                                                                                               |                                            |                                                          |                                                          |                                                     |                                                      |                |
|----------------------------------------------------------------------------------|------------------------|-----------------|----------------------------------------------|-----------------|--------------------------------------------------------------------------------------------------------------------|--------------------------------------------|----------------------------------------------------------|----------------------------------------------------------|-----------------------------------------------------|------------------------------------------------------|----------------|
| Name                                                                             | Conc.                  | (Unit)          | T <sub>0</sub> (°C)                          | 28.8            |                                                                                                                    | H <sub>2</sub>                             | O <sub>2</sub>                                           | N <sub>2</sub>                                           | Sum                                                 |                                                      |                |
| Pd-PVP                                                                           | 8.31                   | (mg/L)          | T (°C)                                       | 30.1            | Set                                                                                                                | 10.00                                      | 20.00                                                    | 20.00                                                    | 50.00                                               |                                                      |                |
| Pt(NH <sub>3</sub> ) <sub>4</sub> (NO <sub>3</sub> ) <sub>2</sub>                | 0.0833                 | (mg-Pt/L)       | P <sub>0</sub> (hPa)                         | 1010.3          | Calibrated                                                                                                         | 10.06                                      | 18.03                                                    | 20.30                                                    | 48.39                                               |                                                      |                |
| H <sub>2</sub> SO <sub>4</sub>                                                   | 0.01                   | (N)             | P (hPa)                                      | 1016.5          | Determination of final [H <sub>2</sub> O <sub>2</sub> ]                                                            | Sample (g)                                 | Absorbance (—)                                           | [H <sub>2</sub> O <sub>2</sub> ] (mmol L <sup>-1</sup> ) |                                                     |                                                      |                |
| NaBr                                                                             | 0.001                  | (N)             | Agitation (rpm)                              | 1200            |                                                                                                                    |                                            |                                                          |                                                          |                                                     | 0.420                                                | 0.561          |
| Comment:<br>Catalyst activation: H <sub>2</sub> gas 20 sccm at 303 K for 40 min. |                        |                 |                                              |                 | Analysis of H <sub>2</sub> O <sub>2</sub> formation selectivity and H <sub>2</sub> O <sub>2</sub> destruction rate |                                            |                                                          | S <sub>f</sub> (—)                                       | 0.4774                                              |                                                      |                |
|                                                                                  |                        |                 |                                              |                 |                                                                                                                    |                                            |                                                          | k <sub>d</sub> [Cat] (h <sup>-1</sup> )                  | 0.1894                                              |                                                      |                |
|                                                                                  |                        |                 |                                              |                 |                                                                                                                    |                                            |                                                          | R <sup>2</sup>                                           | 0.9864                                              |                                                      |                |
| GC calibration                                                                   |                        | GC count        |                                              |                 | Ratio of sensitivity (toward N <sub>2</sub> )                                                                      |                                            | Feed gas measurement                                     |                                                          |                                                     |                                                      |                |
| Timing                                                                           | No.                    | H <sub>2</sub>  | O <sub>2</sub>                               | N <sub>2</sub>  | H <sub>2</sub>                                                                                                     | O <sub>2</sub>                             |                                                          |                                                          |                                                     |                                                      |                |
| Before reaction                                                                  | 1                      | 1464950         | 294354                                       | 262893          | 0.0889                                                                                                             | 0.0892                                     | 0.793                                                    | T <sub>a</sub> (°C)                                      | 29.0                                                |                                                      |                |
|                                                                                  | 2                      | 1474509         | 296356                                       | 264720          | 0.0890                                                                                                             |                                            |                                                          | 0.793                                                    | P <sub>0</sub> (hPa)                                | 1010.2                                               |                |
|                                                                                  | 3                      | 1475699         | 296674                                       | 265319          | 0.0891                                                                                                             |                                            |                                                          | 0.794                                                    | Flow (cc/min)                                       |                                                      |                |
| After reaction                                                                   | 4                      | 1613322         | 325883                                       | 291217          | 0.0894                                                                                                             |                                            |                                                          | 0.793                                                    | H <sub>2</sub>                                      | 11.62                                                |                |
|                                                                                  | 5                      | 1617170         | 326632                                       | 291819          | 0.0894                                                                                                             |                                            |                                                          | 0.793                                                    | O <sub>2</sub>                                      | 20.82                                                |                |
|                                                                                  | 6                      | 1634100         | 329939                                       | 294815          | 0.0894                                                                                                             |                                            |                                                          | 0.793                                                    | N <sub>2</sub>                                      | 23.45                                                |                |
| Time                                                                             |                        |                 |                                              | GC count        |                                                                                                                    |                                            | t <sub>correct</sub> (min)                               | Outlet flow (sccm)                                       |                                                     | Conversion(%)                                        |                |
| H                                                                                | M                      | S               | min.                                         | H <sub>2</sub>  | O <sub>2</sub>                                                                                                     | N <sub>2</sub>                             |                                                          | H <sub>2</sub>                                           | O <sub>2</sub>                                      | H <sub>2</sub>                                       | O <sub>2</sub> |
| 17                                                                               | 4                      | 8               | 4.0                                          | 357093          | 92286                                                                                                              | 310691                                     | 0.00                                                     | 3.71                                                     | 13.32                                               | 63.15                                                | 26.13          |
| 17                                                                               | 14                     | 12              | 14.1                                         | 449904          | 172347                                                                                                             | 238359                                     | 8.75                                                     | 3.70                                                     | 13.36                                               | 63.24                                                | 25.89          |
| 17                                                                               | 24                     | 14              | 24.1                                         | 459388          | 186891                                                                                                             | 228679                                     | 18.78                                                    | 3.69                                                     | 13.41                                               | 63.34                                                | 25.62          |
| 17                                                                               | 34                     | 18              | 34.2                                         | 468924          | 192634                                                                                                             | 230666                                     | 28.85                                                    | 3.68                                                     | 13.45                                               | 63.40                                                | 25.38          |
| 17                                                                               | 44                     | 20              | 44.2                                         | 469941          | 195125                                                                                                             | 232565                                     | 38.88                                                    | 3.66                                                     | 13.51                                               | 63.62                                                | 25.03          |
| 17                                                                               | 54                     | 24              | 54.3                                         | 469723          | 195471                                                                                                             | 232368                                     | 48.95                                                    | 3.66                                                     | 13.55                                               | 63.61                                                | 24.83          |
| 18                                                                               | 4                      | 26              | 64.3                                         | 473146          | 197089                                                                                                             | 233820                                     | 58.98                                                    | 3.66                                                     | 13.58                                               | 63.57                                                | 24.68          |
| 18                                                                               | 14                     | 30              | 74.4                                         | 477685          | 198821                                                                                                             | 235402                                     | 69.05                                                    | 3.68                                                     | 13.60                                               | 63.47                                                | 24.53          |
| 18                                                                               | 24                     | 32              | 84.4                                         | 480342          | 199983                                                                                                             | 236370                                     | 79.08                                                    | 3.68                                                     | 13.63                                               | 63.42                                                | 24.40          |
| 18                                                                               | 34                     | 34              | 94.4                                         | 474728          | 197594                                                                                                             | 233188                                     | 89.11                                                    | 3.69                                                     | 13.65                                               | 63.35                                                | 24.28          |
| 18                                                                               | 44                     | 38              | 104.5                                        | 479665          | 199354                                                                                                             | 234773                                     | 99.18                                                    | 3.70                                                     | 13.68                                               | 63.22                                                | 24.13          |
| 18                                                                               | 54                     | 40              | 114.5                                        | 482716          | 200363                                                                                                             | 235572                                     | 109.21                                                   | 3.71                                                     | 13.70                                               | 63.11                                                | 24.00          |
| 19                                                                               | 4                      | 44              | 124.6                                        | 485877          | 201771                                                                                                             | 236679                                     | 119.28                                                   | 3.72                                                     | 13.73                                               | 63.04                                                | 23.82          |
| t <sub>correct</sub> (min)                                                       | Partial pressure (kPa) |                 | Rate (mmol L <sup>-1</sup> h <sup>-1</sup> ) |                 | d[H <sub>2</sub> O <sub>2</sub> ]/dt (mmol L <sup>-1</sup> h <sup>-1</sup> )                                       | Σ[H <sub>2</sub> ] (mmol L <sup>-1</sup> ) | [H <sub>2</sub> O <sub>2</sub> ] (mmol L <sup>-1</sup> ) | S <sub>e</sub> (—)                                       | Σ <sub>2</sub> [H <sub>2</sub> O <sub>2</sub> ] (h) | Σ <sub>1</sub> /[H <sub>2</sub> O <sub>2</sub> ] (—) |                |
|                                                                                  | P <sub>H2</sub>        | P <sub>O2</sub> | r <sub>H2</sub>                              | r <sub>O2</sub> |                                                                                                                    |                                            |                                                          |                                                          |                                                     |                                                      |                |
| 0.00                                                                             | 9.68                   | 34.75           | 56.72                                        | 42.05           | 27.39                                                                                                              | 0.00                                       | 0.00                                                     |                                                          | 0.000                                               | 0.000                                                |                |
| 8.75                                                                             | 9.64                   | 34.83           | 56.80                                        | 41.67           | 26.55                                                                                                              | 8.28                                       | 3.93                                                     | 0.48                                                     | 0.073                                               | 2.105                                                |                |
| 18.78                                                                            | 9.61                   | 34.92           | 56.89                                        | 41.24           | 25.59                                                                                                              | 17.78                                      | 8.29                                                     | 0.47                                                     | 0.158                                               | 2.145                                                |                |
| 28.85                                                                            | 9.58                   | 35.00           | 56.95                                        | 40.84           | 24.74                                                                                                              | 27.33                                      | 12.51                                                    | 0.46                                                     | 0.244                                               | 2.184                                                |                |
| 38.88                                                                            | 9.51                   | 35.13           | 57.15                                        | 40.28           | 23.42                                                                                                              | 36.87                                      | 16.54                                                    | 0.45                                                     | 0.332                                               | 2.229                                                |                |
| 48.95                                                                            | 9.51                   | 35.18           | 57.14                                        | 39.97           | 22.80                                                                                                              | 46.46                                      | 20.42                                                    | 0.44                                                     | 0.420                                               | 2.276                                                |                |
| 58.98                                                                            | 9.51                   | 35.23           | 57.10                                        | 39.72           | 22.35                                                                                                              | 56.01                                      | 24.19                                                    | 0.43                                                     | 0.509                                               | 2.315                                                |                |
| 69.05                                                                            | 9.53                   | 35.26           | 57.01                                        | 39.48           | 21.95                                                                                                              | 65.58                                      | 27.91                                                    | 0.43                                                     | 0.598                                               | 2.350                                                |                |
| 79.08                                                                            | 9.53                   | 35.30           | 56.96                                        | 39.27           | 21.58                                                                                                              | 75.11                                      | 31.55                                                    | 0.42                                                     | 0.686                                               | 2.381                                                |                |
| 89.11                                                                            | 9.54                   | 35.32           | 56.90                                        | 39.08           | 21.26                                                                                                              | 84.63                                      | 35.13                                                    | 0.42                                                     | 0.775                                               | 2.409                                                |                |
| 99.18                                                                            | 9.57                   | 35.36           | 56.79                                        | 38.83           | 20.87                                                                                                              | 94.17                                      | 38.66                                                    | 0.41                                                     | 0.864                                               | 2.436                                                |                |
| 109.21                                                                           | 9.59                   | 35.39           | 56.69                                        | 38.63           | 20.56                                                                                                              | 103.66                                     | 42.13                                                    | 0.41                                                     | 0.954                                               | 2.461                                                |                |
| 119.28                                                                           | 9.59                   | 35.43           | 56.63                                        | 38.34           | 20.06                                                                                                              | 113.16                                     | 45.54                                                    | 0.40                                                     | 1.044                                               | 2.485                                                |                |

## H<sub>2</sub>O<sub>2</sub> Synthesis Data Sheet

Entry No. 19 (Exp. T373) Employed in: Table 3

| Catalyst, Additives                                                                                                                                         |                        |                 | Reaction conditions                          |                 | Gas feed rate (sccm)                                                                                               |                                            |                                                          |                                                          |                                                     |                                                      |                |
|-------------------------------------------------------------------------------------------------------------------------------------------------------------|------------------------|-----------------|----------------------------------------------|-----------------|--------------------------------------------------------------------------------------------------------------------|--------------------------------------------|----------------------------------------------------------|----------------------------------------------------------|-----------------------------------------------------|------------------------------------------------------|----------------|
| Name                                                                                                                                                        | Conc.                  | (Unit)          | T <sub>0</sub> (°C)                          | 23.4            |                                                                                                                    | H <sub>2</sub>                             | O <sub>2</sub>                                           | N <sub>2</sub>                                           | Sum                                                 |                                                      |                |
| Pd-PVP                                                                                                                                                      | 8.29                   | (mg/L)          | T (°C)                                       | 30.0            | Set                                                                                                                | 10.00                                      | 20.00                                                    | 20.00                                                    | 50.00                                               |                                                      |                |
| Pt(NH <sub>3</sub> ) <sub>4</sub> (NO <sub>3</sub> ) <sub>2</sub>                                                                                           | 0.0833                 | (mg-Pt/L)       | P <sub>0</sub> (hPa)                         | 998.9           | Calibrated                                                                                                         | 10.25                                      | 18.24                                                    | 19.81                                                    | 48.29                                               |                                                      |                |
| H <sub>2</sub> SO <sub>4</sub>                                                                                                                              | 0.01                   | (N)             | P (hPa)                                      | 1004.9          | Determination of final [H <sub>2</sub> O <sub>2</sub> ]                                                            | Sample (g)                                 | Absorbance (—)                                           | [H <sub>2</sub> O <sub>2</sub> ] (mmol L <sup>-1</sup> ) |                                                     |                                                      |                |
| NaBr                                                                                                                                                        | 0.001                  | (N)             | Agitation (rpm)                              | 1200            |                                                                                                                    |                                            |                                                          |                                                          | 0.712                                               | 1.086                                                | 52.61          |
| Comment:<br>Catalyst activation: H <sub>2</sub> gas 20 sccm at 303 K for 40 min.<br>Treatment of activated catalyst: H <sub>2</sub> 2 MPa at 303 K for 2 h. |                        |                 |                                              |                 | Analysis of H <sub>2</sub> O <sub>2</sub> formation selectivity and H <sub>2</sub> O <sub>2</sub> destruction rate |                                            | S <sub>f</sub> (—)                                       | 0.4477                                                   |                                                     |                                                      |                |
|                                                                                                                                                             |                        |                 |                                              |                 |                                                                                                                    |                                            | k <sub>d</sub> [Cat] (h <sup>-1</sup> )                  | 0.2009                                                   |                                                     |                                                      |                |
|                                                                                                                                                             |                        |                 |                                              |                 |                                                                                                                    |                                            | R <sup>2</sup>                                           | 0.9838                                                   |                                                     |                                                      |                |
| GC calibration                                                                                                                                              |                        | GC count        |                                              |                 | Ratio of sensitivity (toward N <sub>2</sub> )                                                                      |                                            | Feed gas measurement                                     |                                                          |                                                     |                                                      |                |
| Timing                                                                                                                                                      | No.                    | H <sub>2</sub>  | O <sub>2</sub>                               | N <sub>2</sub>  | H <sub>2</sub>                                                                                                     | O <sub>2</sub>                             |                                                          |                                                          |                                                     |                                                      |                |
| Before reaction                                                                                                                                             | 1                      | 1902305         | 386918                                       | 337988          | 0.0919                                                                                                             | 0.0920                                     | 0.805                                                    | T <sub>a</sub> (°C)                                      | 23.7                                                |                                                      |                |
|                                                                                                                                                             | 2                      | 1920329         | 390884                                       | 341498          | 0.0920                                                                                                             |                                            |                                                          | 0.804                                                    | P <sub>0</sub> (hPa)                                | 996.8                                                |                |
|                                                                                                                                                             | 3                      | 1923961         | 391468                                       | 341988          | 0.0920                                                                                                             |                                            |                                                          | 0.804                                                    | Flow (cc/min)                                       |                                                      |                |
| After reaction                                                                                                                                              | 4                      | 1964178         | 399560                                       | 349133          | 0.0920                                                                                                             |                                            |                                                          | 0.804                                                    | H <sub>2</sub>                                      | 11.66                                                |                |
|                                                                                                                                                             | 5                      | 1967996         | 400411                                       | 350548          | 0.0921                                                                                                             |                                            |                                                          | 0.806                                                    | O <sub>2</sub>                                      | 20.75                                                |                |
|                                                                                                                                                             | 6                      | 1961158         | 398498                                       | 348265          | 0.0919                                                                                                             |                                            |                                                          | 0.805                                                    | N <sub>2</sub>                                      | 22.54                                                |                |
| Time                                                                                                                                                        |                        |                 |                                              | GC count        |                                                                                                                    |                                            | t <sub>correct</sub> (min)                               | Outlet flow (sccm)                                       |                                                     | Conversion(%)                                        |                |
| H                                                                                                                                                           | M                      | S               | min.                                         | H <sub>2</sub>  | O <sub>2</sub>                                                                                                     | N <sub>2</sub>                             |                                                          | H <sub>2</sub>                                           | O <sub>2</sub>                                      | H <sub>2</sub>                                       | O <sub>2</sub> |
| 15                                                                                                                                                          | 19                     | 10              | 4.0                                          | 361444          | 103076                                                                                                             | 370430                                     | 0.00                                                     | 3.08                                                     | 13.02                                               | 69.98                                                | 28.59          |
| 15                                                                                                                                                          | 29                     | 12              | 14.0                                         | 429561          | 200419                                                                                                             | 293358                                     | 8.55                                                     | 3.05                                                     | 13.06                                               | 70.22                                                | 28.38          |
| 15                                                                                                                                                          | 39                     | 16              | 24.1                                         | 462150          | 230357                                                                                                             | 289132                                     | 18.61                                                    | 3.02                                                     | 13.11                                               | 70.50                                                | 28.13          |
| 15                                                                                                                                                          | 49                     | 18              | 34.1                                         | 464516          | 231951                                                                                                             | 281093                                     | 28.65                                                    | 3.01                                                     | 13.15                                               | 70.62                                                | 27.88          |
| 15                                                                                                                                                          | 59                     | 22              | 44.2                                         | 434493          | 223290                                                                                                             | 269717                                     | 38.71                                                    | 2.93                                                     | 13.19                                               | 71.36                                                | 27.64          |
| 16                                                                                                                                                          | 9                      | 24              | 54.2                                         | 445080          | 228103                                                                                                             | 274546                                     | 48.75                                                    | 2.95                                                     | 13.24                                               | 71.18                                                | 27.38          |
| 16                                                                                                                                                          | 19                     | 26              | 64.3                                         | 447555          | 230196                                                                                                             | 276780                                     | 58.78                                                    | 2.95                                                     | 13.26                                               | 71.25                                                | 27.31          |
| 16                                                                                                                                                          | 29                     | 30              | 74.3                                         | 448611          | 230287                                                                                                             | 276337                                     | 68.85                                                    | 2.96                                                     | 13.28                                               | 71.14                                                | 27.16          |
| 16                                                                                                                                                          | 39                     | 32              | 84.4                                         | 450912          | 231221                                                                                                             | 276750                                     | 78.88                                                    | 2.97                                                     | 13.32                                               | 71.03                                                | 26.98          |
| 16                                                                                                                                                          | 49                     | 36              | 94.4                                         | 446896          | 228737                                                                                                             | 273315                                     | 88.95                                                    | 2.98                                                     | 13.34                                               | 70.93                                                | 26.85          |
| 16                                                                                                                                                          | 59                     | 38              | 104.5                                        | 447655          | 227921                                                                                                             | 271679                                     | 98.98                                                    | 3.00                                                     | 13.37                                               | 70.71                                                | 26.68          |
| 17                                                                                                                                                          | 9                      | 42              | 114.5                                        | 472348          | 234125                                                                                                             | 276583                                     | 109.05                                                   | 3.11                                                     | 13.49                                               | 69.64                                                | 26.02          |
| 17                                                                                                                                                          | 19                     | 44              | 124.6                                        | 494084          | 244774                                                                                                             | 288250                                     | 119.08                                                   | 3.12                                                     | 13.53                                               | 69.53                                                | 25.78          |
| t <sub>correct</sub> (min)                                                                                                                                  | Partial pressure (kPa) |                 | Rate (mmol L <sup>-1</sup> h <sup>-1</sup> ) |                 | d[H <sub>2</sub> O <sub>2</sub> ]/dt (mmol L <sup>-1</sup> h <sup>-1</sup> )                                       | Σ[H <sub>2</sub> ] (mmol L <sup>-1</sup> ) | [H <sub>2</sub> O <sub>2</sub> ] (mmol L <sup>-1</sup> ) | S <sub>e</sub> (—)                                       | Σ <sub>2</sub> [H <sub>2</sub> O <sub>2</sub> ] (h) | Σ <sub>1</sub> /[H <sub>2</sub> O <sub>2</sub> ] (—) |                |
| 0.00                                                                                                                                                        | P <sub>H2</sub>        | P <sub>O2</sub> | r <sub>H2</sub>                              | r <sub>O2</sub> |                                                                                                                    |                                            |                                                          |                                                          |                                                     |                                                      |                |
| 0.00                                                                                                                                                        | 8.25                   | 34.90           | 64.03                                        | 46.54           | 29.06                                                                                                              | 0.00                                       | 0.00                                                     |                                                          | 0.000                                               | 0.000                                                |                |
| 8.55                                                                                                                                                        | 8.18                   | 34.99           | 64.24                                        | 46.20           | 28.16                                                                                                              | 9.14                                       | 4.08                                                     | 0.45                                                     | 0.071                                               | 2.241                                                |                |
| 18.61                                                                                                                                                       | 8.10                   | 35.10           | 64.50                                        | 45.80           | 27.10                                                                                                              | 19.94                                      | 8.71                                                     | 0.44                                                     | 0.156                                               | 2.288                                                |                |
| 28.65                                                                                                                                                       | 8.06                   | 35.19           | 64.61                                        | 45.39           | 26.17                                                                                                              | 30.73                                      | 13.17                                                    | 0.43                                                     | 0.242                                               | 2.334                                                |                |
| 38.71                                                                                                                                                       | 7.86                   | 35.34           | 65.29                                        | 45.01           | 24.73                                                                                                              | 41.63                                      | 17.44                                                    | 0.42                                                     | 0.330                                               | 2.387                                                |                |
| 48.75                                                                                                                                                       | 7.89                   | 35.40           | 65.12                                        | 44.59           | 24.05                                                                                                              | 52.53                                      | 21.52                                                    | 0.41                                                     | 0.419                                               | 2.441                                                |                |
| 58.78                                                                                                                                                       | 7.87                   | 35.43           | 65.19                                        | 44.47           | 23.74                                                                                                              | 63.43                                      | 25.51                                                    | 0.40                                                     | 0.508                                               | 2.486                                                |                |
| 68.85                                                                                                                                                       | 7.90                   | 35.46           | 65.08                                        | 44.23           | 23.37                                                                                                              | 74.36                                      | 29.46                                                    | 0.40                                                     | 0.596                                               | 2.524                                                |                |
| 78.88                                                                                                                                                       | 7.92                   | 35.51           | 64.99                                        | 43.93           | 22.86                                                                                                              | 85.23                                      | 33.33                                                    | 0.39                                                     | 0.684                                               | 2.557                                                |                |
| 88.95                                                                                                                                                       | 7.94                   | 35.54           | 64.89                                        | 43.72           | 22.55                                                                                                              | 96.13                                      | 37.14                                                    | 0.39                                                     | 0.773                                               | 2.588                                                |                |
| 98.98                                                                                                                                                       | 7.99                   | 35.57           | 64.69                                        | 43.43           | 22.18                                                                                                              | 106.96                                     | 40.88                                                    | 0.38                                                     | 0.862                                               | 2.616                                                |                |
| 109.05                                                                                                                                                      | 8.22                   | 35.66           | 63.71                                        | 42.36           | 21.01                                                                                                              | 117.73                                     | 44.50                                                    | 0.38                                                     | 0.953                                               | 2.645                                                |                |
| 119.08                                                                                                                                                      | 8.24                   | 35.72           | 63.61                                        | 41.98           | 20.35                                                                                                              | 128.38                                     | 47.96                                                    | 0.37                                                     | 1.045                                               | 2.677                                                |                |

## H<sub>2</sub>O<sub>2</sub> Synthesis Data Sheet

Entry No. 20 (Exp. T381) Employed in: Table 3

| Catalyst, Additives                                                                                                                                           |                        |                 | Reaction conditions                          |                 | Gas feed rate (sccm)                                                                                               |                                            |                                                          |                                                          |                                                     |                                                      |                |
|---------------------------------------------------------------------------------------------------------------------------------------------------------------|------------------------|-----------------|----------------------------------------------|-----------------|--------------------------------------------------------------------------------------------------------------------|--------------------------------------------|----------------------------------------------------------|----------------------------------------------------------|-----------------------------------------------------|------------------------------------------------------|----------------|
| Name                                                                                                                                                          | Conc.                  | (Unit)          | T <sub>0</sub> (°C)                          | 20.3            |                                                                                                                    | H <sub>2</sub>                             | O <sub>2</sub>                                           | N <sub>2</sub>                                           | Sum                                                 |                                                      |                |
| Pd-PVP                                                                                                                                                        | 8.29                   | (mg/L)          | T (°C)                                       | 29.9            | Set                                                                                                                | 15.00                                      | 20.00                                                    | 15.00                                                    | 50.00                                               |                                                      |                |
| Pt(NH <sub>3</sub> ) <sub>4</sub> (NO <sub>3</sub> ) <sub>2</sub>                                                                                             | 0.0833                 | (mg-Pt/L)       | P <sub>0</sub> (hPa)                         | 1003.2          | Calibrated                                                                                                         | 15.09                                      | 18.55                                                    | 14.51                                                    | 48.15                                               |                                                      |                |
| H <sub>2</sub> SO <sub>4</sub>                                                                                                                                | 0.01                   | (N)             | P (hPa)                                      | 1007.9          | Determination of final [H <sub>2</sub> O <sub>2</sub> ]                                                            | Sample (g)                                 | Absorbance (—)                                           | [H <sub>2</sub> O <sub>2</sub> ] (mmol L <sup>-1</sup> ) |                                                     |                                                      |                |
| NaBr                                                                                                                                                          | 0.001                  | (N)             | Agitation (rpm)                              | 1198            |                                                                                                                    |                                            |                                                          |                                                          | 0.447                                               | 0.936                                                | 72.26          |
| Comment:<br>Catalyst activation: H <sub>2</sub> gas 20 sccm at 303 K for 40 min.<br>Treatment of activated catalyst: N <sub>2</sub> 50 sccm at 343 K for 1 h. |                        |                 |                                              |                 | Analysis of H <sub>2</sub> O <sub>2</sub> formation selectivity and H <sub>2</sub> O <sub>2</sub> destruction rate |                                            | S <sub>f</sub> (—)                                       | 0.5450                                                   |                                                     |                                                      |                |
|                                                                                                                                                               |                        |                 |                                              |                 |                                                                                                                    |                                            | k <sub>d</sub> [Cat] (h <sup>-1</sup> )                  | 0.3540                                                   |                                                     |                                                      |                |
|                                                                                                                                                               |                        |                 |                                              |                 |                                                                                                                    |                                            | R <sup>2</sup>                                           | 0.9945                                                   |                                                     |                                                      |                |
| GC calibration                                                                                                                                                |                        | GC count        |                                              |                 | Ratio of sensitivity (toward N <sub>2</sub> )                                                                      |                                            | Feed gas measurement                                     |                                                          |                                                     |                                                      |                |
| Timing                                                                                                                                                        | No.                    | H <sub>2</sub>  | O <sub>2</sub>                               | N <sub>2</sub>  | H <sub>2</sub>                                                                                                     | O <sub>2</sub>                             | T <sub>a</sub> (°C)                                      | P <sub>0</sub> (hPa)                                     | Flow (cc/min)                                       |                                                      |                |
| Before reaction                                                                                                                                               | 1                      | 2641683         | 374011                                       | 241549          | 0.0951                                                                                                             | 0.826                                      | 0.0955                                                   | 0.826                                                    |                                                     |                                                      |                |
|                                                                                                                                                               | 2                      | 2683002         | 380350                                       | 245758          | 0.0953                                                                                                             | 0.826                                      |                                                          |                                                          |                                                     |                                                      |                |
|                                                                                                                                                               | 3                      | 2684227         | 380544                                       | 245748          | 0.0952                                                                                                             | 0.826                                      |                                                          |                                                          |                                                     |                                                      |                |
| After reaction                                                                                                                                                | 4                      | 2928878         | 417318                                       | 269766          | 0.0958                                                                                                             | 0.826                                      |                                                          |                                                          | H <sub>2</sub>                                      | 16.51                                                |                |
|                                                                                                                                                               | 5                      | 2880643         | 409785                                       | 264985          | 0.0957                                                                                                             | 0.827                                      |                                                          |                                                          | O <sub>2</sub>                                      | 20.29                                                |                |
|                                                                                                                                                               | 6                      | 2966145         | 423029                                       | 273550          | 0.0959                                                                                                             | 0.827                                      |                                                          |                                                          | N <sub>2</sub>                                      | 15.87                                                |                |
| Time                                                                                                                                                          |                        |                 |                                              | GC count        |                                                                                                                    |                                            | t <sub>correct</sub> (min)                               | Outlet flow (sccm)                                       |                                                     | Conversion(%)                                        |                |
| H                                                                                                                                                             | M                      | S               | min.                                         | H <sub>2</sub>  | O <sub>2</sub>                                                                                                     | N <sub>2</sub>                             |                                                          | H <sub>2</sub>                                           | O <sub>2</sub>                                      | H <sub>2</sub>                                       | O <sub>2</sub> |
| 13                                                                                                                                                            | 14                     | 24              | 4.0                                          | 436705          | 73559                                                                                                              | 301053                                     | 0.00                                                     | 4.07                                                     | 10.00                                               | 73.06                                                | 46.06          |
| 13                                                                                                                                                            | 24                     | 26              | 14.0                                         | 590594          | 155274                                                                                                             | 239918                                     | 7.22                                                     | 4.08                                                     | 10.14                                               | 72.98                                                | 45.33          |
| 13                                                                                                                                                            | 34                     | 28              | 24.1                                         | 628996          | 181760                                                                                                             | 223011                                     | 17.25                                                    | 4.09                                                     | 10.33                                               | 72.87                                                | 44.30          |
| 13                                                                                                                                                            | 44                     | 32              | 34.1                                         | 629084          | 185833                                                                                                             | 211980                                     | 27.32                                                    | 4.11                                                     | 10.51                                               | 72.75                                                | 43.35          |
| 13                                                                                                                                                            | 54                     | 34              | 44.2                                         | 629641          | 189937                                                                                                             | 211586                                     | 37.35                                                    | 4.12                                                     | 10.76                                               | 72.68                                                | 41.99          |
| 14                                                                                                                                                            | 4                      | 38              | 54.2                                         | 621026          | 188825                                                                                                             | 207560                                     | 47.42                                                    | 4.15                                                     | 10.90                                               | 72.53                                                | 41.21          |
| 14                                                                                                                                                            | 14                     | 40              | 64.3                                         | 615895          | 189621                                                                                                             | 207128                                     | 57.45                                                    | 4.12                                                     | 10.97                                               | 72.70                                                | 40.84          |
| 14                                                                                                                                                            | 24                     | 44              | 74.3                                         | 630699          | 194538                                                                                                             | 210558                                     | 67.52                                                    | 4.15                                                     | 11.07                                               | 72.50                                                | 40.29          |
| 14                                                                                                                                                            | 34                     | 46              | 84.4                                         | 625935          | 195557                                                                                                             | 210681                                     | 77.55                                                    | 4.12                                                     | 11.13                                               | 72.72                                                | 40.01          |
| 14                                                                                                                                                            | 44                     | 50              | 94.4                                         | 635906          | 200070                                                                                                             | 214511                                     | 87.62                                                    | 4.11                                                     | 11.18                                               | 72.78                                                | 39.73          |
| 14                                                                                                                                                            | 54                     | 52              | 104.5                                        | 642829          | 202424                                                                                                             | 215710                                     | 97.65                                                    | 4.13                                                     | 11.25                                               | 72.64                                                | 39.36          |
| 15                                                                                                                                                            | 4                      | 56              | 114.5                                        | 634213          | 200226                                                                                                             | 212116                                     | 107.72                                                   | 4.14                                                     | 11.31                                               | 72.55                                                | 39.00          |
| 15                                                                                                                                                            | 14                     | 58              | 124.6                                        | 634780          | 201946                                                                                                             | 212961                                     | 117.75                                                   | 4.13                                                     | 11.37                                               | 72.63                                                | 38.72          |
| t <sub>correct</sub> (min)                                                                                                                                    | Partial pressure (kPa) |                 | Rate (mmol L <sup>-1</sup> h <sup>-1</sup> ) |                 | d[H <sub>2</sub> O <sub>2</sub> ]/dt (mmol L <sup>-1</sup> h <sup>-1</sup> )                                       | Σ[H <sub>2</sub> ] (mmol L <sup>-1</sup> ) | [H <sub>2</sub> O <sub>2</sub> ] (mmol L <sup>-1</sup> ) | S <sub>e</sub> (—)                                       | Σ <sub>2</sub> [H <sub>2</sub> O <sub>2</sub> ] (h) | Σ <sub>1</sub> /[H <sub>2</sub> O <sub>2</sub> ] (—) |                |
|                                                                                                                                                               | P <sub>H2</sub>        | P <sub>O2</sub> | r <sub>H2</sub>                              | r <sub>O2</sub> |                                                                                                                    |                                            |                                                          |                                                          |                                                     |                                                      |                |
| 0.00                                                                                                                                                          | 13.74                  | 33.80           | 98.44                                        | 76.27           | 54.10                                                                                                              | 0.00                                       | 0.00                                                     |                                                          | 0.000                                               | 0.000                                                |                |
| 7.22                                                                                                                                                          | 13.70                  | 34.08           | 98.34                                        | 75.06           | 51.78                                                                                                              | 11.84                                      | 6.37                                                     | 0.54                                                     | 0.060                                               | 1.858                                                |                |
| 17.25                                                                                                                                                         | 13.66                  | 34.47           | 98.19                                        | 73.35           | 48.51                                                                                                              | 28.27                                      | 14.76                                                    | 0.52                                                     | 0.146                                               | 1.916                                                |                |
| 27.32                                                                                                                                                         | 13.63                  | 34.83           | 98.03                                        | 71.78           | 45.53                                                                                                              | 44.73                                      | 22.65                                                    | 0.51                                                     | 0.233                                               | 1.975                                                |                |
| 37.35                                                                                                                                                         | 13.55                  | 35.35           | 97.93                                        | 69.53           | 41.13                                                                                                              | 61.12                                      | 29.89                                                    | 0.49                                                     | 0.324                                               | 2.045                                                |                |
| 47.42                                                                                                                                                         | 13.54                  | 35.62           | 97.73                                        | 68.24           | 38.75                                                                                                              | 77.53                                      | 36.59                                                    | 0.47                                                     | 0.417                                               | 2.119                                                |                |
| 57.45                                                                                                                                                         | 13.44                  | 35.79           | 97.96                                        | 67.63           | 37.29                                                                                                              | 93.89                                      | 42.95                                                    | 0.46                                                     | 0.510                                               | 2.186                                                |                |
| 67.52                                                                                                                                                         | 13.48                  | 35.96           | 97.69                                        | 66.72           | 35.76                                                                                                              | 110.31                                     | 49.08                                                    | 0.44                                                     | 0.604                                               | 2.247                                                |                |
| 77.55                                                                                                                                                         | 13.36                  | 36.11           | 97.99                                        | 66.26           | 34.54                                                                                                              | 126.67                                     | 54.96                                                    | 0.43                                                     | 0.697                                               | 2.305                                                |                |
| 87.62                                                                                                                                                         | 13.31                  | 36.23           | 98.07                                        | 65.79           | 33.50                                                                                                              | 143.12                                     | 60.67                                                    | 0.42                                                     | 0.792                                               | 2.359                                                |                |
| 97.65                                                                                                                                                         | 13.34                  | 36.34           | 97.88                                        | 65.17           | 32.47                                                                                                              | 159.50                                     | 66.18                                                    | 0.41                                                     | 0.886                                               | 2.410                                                |                |
| 107.72                                                                                                                                                        | 13.35                  | 36.46           | 97.76                                        | 64.58           | 31.40                                                                                                              | 175.91                                     | 71.54                                                    | 0.41                                                     | 0.981                                               | 2.459                                                |                |
| 117.75                                                                                                                                                        | 13.29                  | 36.58           | 97.87                                        | 64.12           | 30.36                                                                                                              | 192.27                                     | 76.70                                                    | 0.40                                                     | 1.077                                               | 2.507                                                |                |

## H<sub>2</sub>O<sub>2</sub> Synthesis Data Sheet

Entry No. 21 (Exp. T342) Employed in: Table 3 Fig. 6

| Catalyst, Additives                                                              |                        |                 | Reaction conditions                          |                 | Gas feed rate (sccm)                                                                                               |                                            |                                                          |                                                          |                                                     |                                                      |                |
|----------------------------------------------------------------------------------|------------------------|-----------------|----------------------------------------------|-----------------|--------------------------------------------------------------------------------------------------------------------|--------------------------------------------|----------------------------------------------------------|----------------------------------------------------------|-----------------------------------------------------|------------------------------------------------------|----------------|
| Name                                                                             | Conc.                  | (Unit)          | T <sub>0</sub> (°C)                          | 28.9            |                                                                                                                    | H <sub>2</sub>                             | O <sub>2</sub>                                           | N <sub>2</sub>                                           | Sum                                                 |                                                      |                |
| Pd-PVP                                                                           | 8.31                   | (mg/L)          | T (°C)                                       | 30.1            | Set                                                                                                                | 15.00                                      | 20.00                                                    | 15.00                                                    | 50.00                                               |                                                      |                |
| Pt(NH <sub>3</sub> ) <sub>4</sub> (NO <sub>3</sub> ) <sub>2</sub>                | 0.0833                 | (mg-Pt/L)       | P <sub>0</sub> (hPa)                         | 1008.7          | Calibrated                                                                                                         | 15.07                                      | 18.42                                                    | 15.13                                                    | 48.62                                               |                                                      |                |
| H <sub>2</sub> SO <sub>4</sub>                                                   | 0.01                   | (N)             | P (hPa)                                      | 1014.1          | Determination of final [H <sub>2</sub> O <sub>2</sub> ]                                                            | Sample (g)                                 | Absorbance (—)                                           | [H <sub>2</sub> O <sub>2</sub> ] (mmol L <sup>-1</sup> ) |                                                     |                                                      |                |
| NaBr                                                                             | 0.001                  | (N)             | Agitation (rpm)                              | 1200            |                                                                                                                    |                                            |                                                          |                                                          |                                                     | 0.626                                                | 1.237          |
| Comment:<br>Catalyst activation: H <sub>2</sub> gas 20 sccm at 303 K for 40 min. |                        |                 |                                              |                 | Analysis of H <sub>2</sub> O <sub>2</sub> formation selectivity and H <sub>2</sub> O <sub>2</sub> destruction rate |                                            |                                                          | S <sub>f</sub> (—)                                       | 0.7215                                              |                                                      |                |
|                                                                                  |                        |                 |                                              |                 |                                                                                                                    |                                            |                                                          | k <sub>d</sub> [Cat] (h <sup>-1</sup> )                  | 0.6178                                              |                                                      |                |
|                                                                                  |                        |                 |                                              |                 |                                                                                                                    |                                            |                                                          | R <sup>2</sup>                                           | 0.9956                                              |                                                      |                |
| GC calibration                                                                   |                        | GC count        |                                              |                 | Ratio of sensitivity (toward N <sub>2</sub> )                                                                      |                                            | Feed gas measurement                                     |                                                          |                                                     |                                                      |                |
| Timing                                                                           | No.                    | H <sub>2</sub>  | O <sub>2</sub>                               | N <sub>2</sub>  | H <sub>2</sub>                                                                                                     | O <sub>2</sub>                             |                                                          |                                                          |                                                     |                                                      |                |
| Before reaction                                                                  | 1                      | 1623170         | 221226                                       | 147983          | 0.0909                                                                                                             | 0.0922                                     | 0.816                                                    | T <sub>a</sub> (°C)                                      | 25.8                                                |                                                      |                |
|                                                                                  | 2                      | 1757315         | 240464                                       | 160968          | 0.0913                                                                                                             |                                            |                                                          | 0.815                                                    | P <sub>0</sub> (hPa)                                | 1008.8                                               |                |
|                                                                                  | 3                      | 1840509         | 252586                                       | 169016          | 0.0915                                                                                                             |                                            |                                                          | 0.815                                                    | Flow (cc/min)                                       |                                                      |                |
| After reaction                                                                   | 4                      | 2355850         | 328331                                       | 220286          | 0.0932                                                                                                             | 0.0922                                     | 0.816                                                    | H <sub>2</sub>                                           | 17.13                                               |                                                      |                |
|                                                                                  | 5                      | 2350952         | 327922                                       | 220043          | 0.0933                                                                                                             |                                            |                                                          | 0.817                                                    | O <sub>2</sub>                                      | 20.93                                                |                |
|                                                                                  | 6                      | 2349289         | 327613                                       | 219760          | 0.0932                                                                                                             |                                            |                                                          | 0.817                                                    | N <sub>2</sub>                                      | 17.19                                                |                |
| Time                                                                             |                        |                 |                                              | GC count        |                                                                                                                    |                                            | t <sub>correct</sub> (min)                               | Outlet flow (sccm)                                       |                                                     | Conversion(%)                                        |                |
| H                                                                                | M                      | S               | min.                                         | H <sub>2</sub>  | O <sub>2</sub>                                                                                                     | N <sub>2</sub>                             |                                                          | H <sub>2</sub>                                           | O <sub>2</sub>                                      | H <sub>2</sub>                                       | O <sub>2</sub> |
| 15                                                                               | 39                     | 18              | 4.0                                          | 517368          | 79332                                                                                                              | 265463                                     | 0.00                                                     | 6.67                                                     | 11.20                                               | 55.72                                                | 39.17          |
| 15                                                                               | 49                     | 20              | 14.0                                         | 844080          | 157109                                                                                                             | 201384                                     | 7.98                                                     | 6.54                                                     | 11.30                                               | 56.62                                                | 38.66          |
| 15                                                                               | 59                     | 24              | 24.1                                         | 876927          | 176358                                                                                                             | 195787                                     | 18.04                                                    | 6.37                                                     | 11.41                                               | 57.74                                                | 38.02          |
| 16                                                                               | 9                      | 26              | 34.1                                         | 867588          | 182385                                                                                                             | 195402                                     | 28.08                                                    | 6.19                                                     | 11.52                                               | 58.91                                                | 37.46          |
| 16                                                                               | 19                     | 30              | 44.2                                         | 867248          | 189325                                                                                                             | 200094                                     | 38.14                                                    | 6.05                                                     | 11.68                                               | 59.89                                                | 36.60          |
| 16                                                                               | 29                     | 32              | 54.2                                         | 844464          | 191518                                                                                                             | 201116                                     | 48.18                                                    | 5.86                                                     | 11.75                                               | 61.14                                                | 36.19          |
| 16                                                                               | 39                     | 36              | 64.3                                         | 748978          | 196479                                                                                                             | 212361                                     | 58.24                                                    | 4.92                                                     | 11.42                                               | 67.36                                                | 38.01          |
| 16                                                                               | 49                     | 38              | 74.3                                         | 759851          | 200758                                                                                                             | 215332                                     | 68.28                                                    | 4.92                                                     | 11.50                                               | 67.34                                                | 37.53          |
| 16                                                                               | 59                     | 42              | 84.4                                         | 765726          | 201950                                                                                                             | 215252                                     | 78.34                                                    | 4.96                                                     | 11.58                                               | 67.08                                                | 37.14          |
| 17                                                                               | 9                      | 44              | 94.4                                         | 767975          | 202517                                                                                                             | 214857                                     | 88.38                                                    | 4.99                                                     | 11.63                                               | 66.92                                                | 36.84          |
| 17                                                                               | 19                     | 48              | 104.5                                        | 776531          | 204758                                                                                                             | 216141                                     | 98.44                                                    | 5.01                                                     | 11.69                                               | 66.75                                                | 36.53          |
| 17                                                                               | 29                     | 50              | 114.5                                        | 770059          | 204322                                                                                                             | 215129                                     | 108.48                                                   | 4.99                                                     | 11.72                                               | 66.87                                                | 36.36          |
| 17                                                                               | 39                     | 52              | 124.6                                        | 776457          | 206384                                                                                                             | 216248                                     | 118.51                                                   | 5.01                                                     | 11.78                                               | 66.77                                                | 36.05          |
| t <sub>correct</sub> (min)                                                       | Partial pressure (kPa) |                 | Rate (mmol L <sup>-1</sup> h <sup>-1</sup> ) |                 | d[H <sub>2</sub> O <sub>2</sub> ]/dt (mmol L <sup>-1</sup> h <sup>-1</sup> )                                       | Σ[H <sub>2</sub> ] (mmol L <sup>-1</sup> ) | [H <sub>2</sub> O <sub>2</sub> ] (mmol L <sup>-1</sup> ) | S <sub>e</sub> (—)                                       | Σ <sub>2</sub> [H <sub>2</sub> O <sub>2</sub> ] (h) | Σ <sub>1</sub> /[H <sub>2</sub> O <sub>2</sub> ] (—) |                |
|                                                                                  | P <sub>H2</sub>        | P <sub>O2</sub> | r <sub>H2</sub>                              | r <sub>O2</sub> |                                                                                                                    |                                            |                                                          |                                                          |                                                     |                                                      |                |
| 0.00                                                                             | 19.65                  | 32.98           | 74.99                                        | 64.41           | 53.83                                                                                                              | 0.00                                       | 0.00                                                     |                                                          | 0.000                                               | 0.000                                                |                |
| 7.98                                                                             | 19.28                  | 33.30           | 76.20                                        | 63.57           | 50.95                                                                                                              | 10.05                                      | 6.96                                                     | 0.69                                                     | 0.066                                               | 1.443                                                |                |
| 18.04                                                                            | 18.81                  | 33.70           | 77.71                                        | 62.52           | 47.33                                                                                                              | 22.96                                      | 15.21                                                    | 0.66                                                     | 0.153                                               | 1.510                                                |                |
| 28.08                                                                            | 18.33                  | 34.08           | 79.29                                        | 61.60           | 43.91                                                                                                              | 36.09                                      | 22.84                                                    | 0.63                                                     | 0.241                                               | 1.580                                                |                |
| 38.14                                                                            | 17.88                  | 34.54           | 80.60                                        | 60.19           | 39.77                                                                                                              | 49.50                                      | 29.86                                                    | 0.60                                                     | 0.332                                               | 1.658                                                |                |
| 48.18                                                                            | 17.38                  | 34.88           | 82.29                                        | 59.52           | 36.75                                                                                                              | 63.12                                      | 36.26                                                    | 0.57                                                     | 0.426                                               | 1.741                                                |                |
| 58.24                                                                            | 15.19                  | 35.25           | 90.66                                        | 62.50           | 34.34                                                                                                              | 77.63                                      | 42.22                                                    | 0.54                                                     | 0.522                                               | 1.839                                                |                |
| 68.28                                                                            | 15.15                  | 35.42           | 90.63                                        | 61.72           | 32.80                                                                                                              | 92.79                                      | 47.83                                                    | 0.52                                                     | 0.618                                               | 1.940                                                |                |
| 78.34                                                                            | 15.22                  | 35.52           | 90.28                                        | 61.07           | 31.86                                                                                                              | 107.96                                     | 53.26                                                    | 0.49                                                     | 0.714                                               | 2.027                                                |                |
| 88.38                                                                            | 15.26                  | 35.60           | 90.07                                        | 60.59           | 31.11                                                                                                              | 123.04                                     | 58.52                                                    | 0.48                                                     | 0.810                                               | 2.103                                                |                |
| 98.44                                                                            | 15.30                  | 35.68           | 89.84                                        | 60.06           | 30.28                                                                                                              | 138.13                                     | 63.67                                                    | 0.46                                                     | 0.905                                               | 2.170                                                |                |
| 108.48                                                                           | 15.23                  | 35.76           | 90.00                                        | 59.79           | 29.59                                                                                                              | 153.17                                     | 68.68                                                    | 0.45                                                     | 1.000                                               | 2.230                                                |                |
| 118.51                                                                           | 15.25                  | 35.85           | 89.86                                        | 59.28           | 28.70                                                                                                              | 168.21                                     | 73.55                                                    | 0.44                                                     | 1.096                                               | 2.287                                                |                |

## H<sub>2</sub>O<sub>2</sub> Synthesis Data Sheet

Entry No. 22 (Exp. T353) Employed in: Table 3

| Catalyst, Additives                                                                                                                                           |                        |                 | Reaction conditions                          |                 | Gas feed rate (sccm)                                                                                               |                                            |                                                          |                                                          |                                                     |                                                      |       |
|---------------------------------------------------------------------------------------------------------------------------------------------------------------|------------------------|-----------------|----------------------------------------------|-----------------|--------------------------------------------------------------------------------------------------------------------|--------------------------------------------|----------------------------------------------------------|----------------------------------------------------------|-----------------------------------------------------|------------------------------------------------------|-------|
| Name                                                                                                                                                          | Conc.                  | (Unit)          | T <sub>0</sub> (°C)                          | 28.4            |                                                                                                                    | H <sub>2</sub>                             | O <sub>2</sub>                                           | N <sub>2</sub>                                           | Sum                                                 |                                                      |       |
| Pd-PVP                                                                                                                                                        | 8.29                   | (mg/L)          | T (°C)                                       | 30.2            | Set                                                                                                                | 15.00                                      | 20.00                                                    | 15.00                                                    | 50.00                                               |                                                      |       |
| Pt(NH <sub>3</sub> ) <sub>4</sub> (NO <sub>3</sub> ) <sub>2</sub>                                                                                             | 0.0833                 | (mg-Pt/L)       | P <sub>0</sub> (hPa)                         | 1011.0          | Calibrated                                                                                                         | 15.08                                      | 17.69                                                    | 15.65                                                    | 48.42                                               |                                                      |       |
| H <sub>2</sub> SO <sub>4</sub>                                                                                                                                | 0.01                   | (N)             | P (hPa)                                      | 1016.2          | Determination of final [H <sub>2</sub> O <sub>2</sub> ]                                                            | Sample (g)                                 | Absorbance (—)                                           | [H <sub>2</sub> O <sub>2</sub> ] (mmol L <sup>-1</sup> ) |                                                     |                                                      |       |
| NaBr                                                                                                                                                          | 0.001                  | (N)             | Agitation (rpm)                              | 1201            |                                                                                                                    |                                            |                                                          |                                                          | 0.885                                               | 1.678                                                | 65.38 |
| Comment:<br>Catalyst activation: H <sub>2</sub> gas 20 sccm at 303 K for 40 min.<br>Treatment of activated catalyst: N <sub>2</sub> 50 sccm at 303 K for 1 h. |                        |                 |                                              |                 | Analysis of H <sub>2</sub> O <sub>2</sub> formation selectivity and H <sub>2</sub> O <sub>2</sub> destruction rate |                                            | S <sub>f</sub> (—)                                       | 0.6547                                                   |                                                     |                                                      |       |
|                                                                                                                                                               |                        |                 |                                              |                 |                                                                                                                    |                                            | k <sub>d</sub> [Cat] (h <sup>-1</sup> )                  | 0.7968                                                   |                                                     |                                                      |       |
|                                                                                                                                                               |                        |                 |                                              |                 |                                                                                                                    |                                            | R <sup>2</sup>                                           | 0.9959                                                   |                                                     |                                                      |       |
| GC calibration                                                                                                                                                |                        | GC count        |                                              |                 | Ratio of sensitivity (toward N <sub>2</sub> )                                                                      |                                            | Feed gas measurement                                     |                                                          |                                                     |                                                      |       |
| Timing                                                                                                                                                        | No.                    | H <sub>2</sub>  | O <sub>2</sub>                               | N <sub>2</sub>  | H <sub>2</sub>                                                                                                     | O <sub>2</sub>                             |                                                          |                                                          |                                                     |                                                      |       |
| Before reaction                                                                                                                                               | 1                      | 2160858         | 301480                                       | 202496          | 0.0903                                                                                                             | 0.0906                                     | 0.759                                                    | T <sub>a</sub> (°C)                                      | 27.8                                                |                                                      |       |
|                                                                                                                                                               | 2                      | 2207723         | 308555                                       | 207346          | 0.0905                                                                                                             |                                            |                                                          | 0.760                                                    | P <sub>0</sub> (hPa)                                | 1010.9                                               |       |
|                                                                                                                                                               | 3                      | 2246185         | 313995                                       | 210661          | 0.0904                                                                                                             |                                            |                                                          | 0.758                                                    | Flow (cc/min)                                       |                                                      |       |
| After reaction                                                                                                                                                | 4                      | 2419752         | 339713                                       | 228171          | 0.0909                                                                                                             |                                            |                                                          | 0.759                                                    | H <sub>2</sub>                                      | 17.29                                                |       |
|                                                                                                                                                               | 5                      | 2437349         | 342226                                       | 229709          | 0.0908                                                                                                             |                                            |                                                          | 0.759                                                    | O <sub>2</sub>                                      | 20.28                                                |       |
|                                                                                                                                                               | 6                      | 2451258         | 344474                                       | 231150          | 0.0909                                                                                                             |                                            |                                                          | 0.759                                                    | N <sub>2</sub>                                      | 17.94                                                |       |
| Time                                                                                                                                                          |                        | GC count        |                                              |                 | t <sub>correct</sub> (min)                                                                                         | Outlet flow (sccm)                         |                                                          | Conversion(%)                                            |                                                     |                                                      |       |
| H                                                                                                                                                             | M                      | S               | min.                                         | H <sub>2</sub>  |                                                                                                                    | O <sub>2</sub>                             | N <sub>2</sub>                                           | H <sub>2</sub>                                           | O <sub>2</sub>                                      |                                                      |       |
| 12                                                                                                                                                            | 48                     | 2               | 4.0                                          | 539317          | 85785                                                                                                              | 305531                                     | 0.00                                                     | 6.46                                                     | 10.56                                               | 57.15                                                | 40.32 |
| 12                                                                                                                                                            | 58                     | 4               | 14.0                                         | 847764          | 166466                                                                                                             | 223223                                     | 7.80                                                     | 6.22                                                     | 10.61                                               | 58.77                                                | 40.01 |
| 13                                                                                                                                                            | 8                      | 8               | 24.1                                         | 847530          | 182485                                                                                                             | 209531                                     | 17.87                                                    | 5.91                                                     | 10.68                                               | 60.84                                                | 39.62 |
| 13                                                                                                                                                            | 18                     | 10              | 34.1                                         | 825019          | 189505                                                                                                             | 209841                                     | 27.90                                                    | 5.58                                                     | 10.73                                               | 63.03                                                | 39.37 |
| 13                                                                                                                                                            | 28                     | 14              | 44.2                                         | 789509          | 191793                                                                                                             | 209751                                     | 37.97                                                    | 5.34                                                     | 10.86                                               | 64.60                                                | 38.61 |
| 13                                                                                                                                                            | 38                     | 16              | 54.2                                         | 748956          | 195164                                                                                                             | 213465                                     | 48.00                                                    | 4.98                                                     | 10.86                                               | 67.00                                                | 38.62 |
| 13                                                                                                                                                            | 48                     | 20              | 64.3                                         | 621198          | 194988                                                                                                             | 220988                                     | 58.07                                                    | 3.99                                                     | 10.48                                               | 73.56                                                | 40.76 |
| 13                                                                                                                                                            | 58                     | 22              | 74.3                                         | 630449          | 198272                                                                                                             | 222582                                     | 68.10                                                    | 4.02                                                     | 10.58                                               | 73.36                                                | 40.19 |
| 14                                                                                                                                                            | 8                      | 26              | 84.4                                         | 643654          | 200758                                                                                                             | 222929                                     | 78.17                                                    | 4.09                                                     | 10.70                                               | 72.85                                                | 39.54 |
| 14                                                                                                                                                            | 18                     | 28              | 94.4                                         | 645706          | 200691                                                                                                             | 220965                                     | 88.20                                                    | 4.14                                                     | 10.79                                               | 72.52                                                | 39.02 |
| 14                                                                                                                                                            | 28                     | 32              | 104.5                                        | 651793          | 202679                                                                                                             | 221516                                     | 98.27                                                    | 4.17                                                     | 10.87                                               | 72.33                                                | 38.57 |
| 14                                                                                                                                                            | 38                     | 34              | 114.5                                        | 660072          | 205371                                                                                                             | 223078                                     | 108.30                                                   | 4.20                                                     | 10.93                                               | 72.17                                                | 38.19 |
| 14                                                                                                                                                            | 48                     | 38              | 124.6                                        | 661684          | 206657                                                                                                             | 223285                                     | 118.37                                                   | 4.20                                                     | 10.99                                               | 72.13                                                | 37.86 |
| t <sub>correct</sub> (min)                                                                                                                                    | Partial pressure (kPa) |                 | Rate (mmol L <sup>-1</sup> h <sup>-1</sup> ) |                 | d[H <sub>2</sub> O <sub>2</sub> ]/dt (mmol L <sup>-1</sup> h <sup>-1</sup> )                                       | Σ[H <sub>2</sub> ] (mmol L <sup>-1</sup> ) | [H <sub>2</sub> O <sub>2</sub> ] (mmol L <sup>-1</sup> ) | S <sub>e</sub> (—)                                       | Σ <sub>2</sub> [H <sub>2</sub> O <sub>2</sub> ] (h) | Σ <sub>1</sub> /[H <sub>2</sub> O <sub>2</sub> ] (—) |       |
| 0.00                                                                                                                                                          | P <sub>H2</sub>        | P <sub>O2</sub> | r <sub>H2</sub>                              | r <sub>O2</sub> |                                                                                                                    |                                            |                                                          |                                                          |                                                     |                                                      |       |
| 0.00                                                                                                                                                          | 19.27                  | 31.47           | 76.95                                        | 63.68           | 50.41                                                                                                              | 0.00                                       | 0.00                                                     |                                                          | 0.000                                               | 0.000                                                |       |
| 7.80                                                                                                                                                          | 18.64                  | 31.82           | 79.14                                        | 63.20           | 47.25                                                                                                              | 10.15                                      | 6.35                                                     | 0.63                                                     | 0.065                                               | 1.598                                                |       |
| 17.87                                                                                                                                                         | 17.84                  | 32.27           | 81.93                                        | 62.58           | 43.23                                                                                                              | 23.66                                      | 13.94                                                    | 0.59                                                     | 0.152                                               | 1.697                                                |       |
| 27.90                                                                                                                                                         | 16.99                  | 32.69           | 84.87                                        | 62.17           | 39.48                                                                                                              | 37.60                                      | 20.85                                                    | 0.55                                                     | 0.241                                               | 1.803                                                |       |
| 37.97                                                                                                                                                         | 16.32                  | 33.21           | 86.99                                        | 60.98           | 34.96                                                                                                              | 52.02                                      | 27.10                                                    | 0.52                                                     | 0.334                                               | 1.920                                                |       |
| 48.00                                                                                                                                                         | 15.39                  | 33.58           | 90.22                                        | 60.99           | 31.75                                                                                                              | 66.84                                      | 32.68                                                    | 0.49                                                     | 0.430                                               | 2.045                                                |       |
| 58.07                                                                                                                                                         | 12.89                  | 33.87           | 99.06                                        | 64.37           | 29.69                                                                                                              | 82.72                                      | 37.83                                                    | 0.46                                                     | 0.528                                               | 2.186                                                |       |
| 68.10                                                                                                                                                         | 12.93                  | 34.05           | 98.79                                        | 63.48           | 28.17                                                                                                              | 99.26                                      | 42.67                                                    | 0.43                                                     | 0.625                                               | 2.326                                                |       |
| 78.17                                                                                                                                                         | 13.10                  | 34.21           | 98.09                                        | 62.44           | 26.80                                                                                                              | 115.78                                     | 47.28                                                    | 0.41                                                     | 0.724                                               | 2.449                                                |       |
| 88.20                                                                                                                                                         | 13.19                  | 34.34           | 97.65                                        | 61.63           | 25.60                                                                                                              | 132.14                                     | 51.66                                                    | 0.39                                                     | 0.823                                               | 2.558                                                |       |
| 98.27                                                                                                                                                         | 13.24                  | 34.47           | 97.39                                        | 60.92           | 24.44                                                                                                              | 148.50                                     | 55.86                                                    | 0.38                                                     | 0.922                                               | 2.659                                                |       |
| 108.30                                                                                                                                                        | 13.27                  | 34.59           | 97.19                                        | 60.31           | 23.44                                                                                                              | 164.77                                     | 59.86                                                    | 0.36                                                     | 1.022                                               | 2.753                                                |       |
| 118.37                                                                                                                                                        | 13.27                  | 34.70           | 97.13                                        | 59.79           | 22.46                                                                                                              | 181.07                                     | 63.71                                                    | 0.35                                                     | 1.123                                               | 2.842                                                |       |

## H<sub>2</sub>O<sub>2</sub> Synthesis Data Sheet

Entry No. 23 (Exp. T359) Employed in: Table 3

| Catalyst, Additives                                                                                                                                                                   |                        |                 | Reaction conditions                          |                 | Gas feed rate (sccm)                                                                                               |                                            |                                                          |                                                          |                                                     |                                                      |                |
|---------------------------------------------------------------------------------------------------------------------------------------------------------------------------------------|------------------------|-----------------|----------------------------------------------|-----------------|--------------------------------------------------------------------------------------------------------------------|--------------------------------------------|----------------------------------------------------------|----------------------------------------------------------|-----------------------------------------------------|------------------------------------------------------|----------------|
| Name                                                                                                                                                                                  | Conc.                  | (Unit)          | T <sub>0</sub> (°C)                          | 24.7            |                                                                                                                    | H <sub>2</sub>                             | O <sub>2</sub>                                           | N <sub>2</sub>                                           | Sum                                                 |                                                      |                |
| Pd-PVP                                                                                                                                                                                | 8.29                   | (mg/L)          | T (°C)                                       | 30.1            | Set                                                                                                                | 15.00                                      | 20.00                                                    | 15.00                                                    | 50.00                                               |                                                      |                |
| Pt(NH <sub>3</sub> ) <sub>4</sub> (NO <sub>3</sub> ) <sub>2</sub>                                                                                                                     | 0.0833                 | (mg-Pt/L)       | P <sub>0</sub> (hPa)                         | 1011.7          | Calibrated                                                                                                         | 14.94                                      | 18.46                                                    | 14.80                                                    | 48.20                                               |                                                      |                |
| H <sub>2</sub> SO <sub>4</sub>                                                                                                                                                        | 0.01                   | (N)             | P (hPa)                                      | 1017.0          | Determination of final [H <sub>2</sub> O <sub>2</sub> ]                                                            | Sample (g)                                 | Absorbance (—)                                           | [H <sub>2</sub> O <sub>2</sub> ] (mmol L <sup>-1</sup> ) |                                                     |                                                      |                |
| NaBr                                                                                                                                                                                  | 0.001                  | (N)             | Agitation (rpm)                              | 1200            |                                                                                                                    |                                            |                                                          |                                                          | 0.684                                               | 1.260                                                | 63.46          |
| Comment:<br>Catalyst activation: H <sub>2</sub> gas 20 sccm at 303 K for 40 min.<br>Treatment of activated catalyst: O <sub>2</sub> 20 sccm, N <sub>2</sub> 15 sccm at 303 K for 2 h. |                        |                 |                                              |                 | Analysis of H <sub>2</sub> O <sub>2</sub> formation selectivity and H <sub>2</sub> O <sub>2</sub> destruction rate |                                            | S <sub>f</sub> (—)                                       | 0.7384                                                   |                                                     |                                                      |                |
|                                                                                                                                                                                       |                        |                 |                                              |                 |                                                                                                                    |                                            | k <sub>d</sub> [Cat] (h <sup>-1</sup> )                  | 0.7810                                                   |                                                     |                                                      |                |
|                                                                                                                                                                                       |                        |                 |                                              |                 |                                                                                                                    |                                            | R <sup>2</sup>                                           | 0.9965                                                   |                                                     |                                                      |                |
| GC calibration                                                                                                                                                                        |                        | GC count        |                                              |                 | Ratio of sensitivity (toward N <sub>2</sub> )                                                                      |                                            | Feed gas measurement                                     |                                                          |                                                     |                                                      |                |
| Timing                                                                                                                                                                                | No.                    | H <sub>2</sub>  | O <sub>2</sub>                               | N <sub>2</sub>  | H <sub>2</sub>                                                                                                     | O <sub>2</sub>                             |                                                          |                                                          |                                                     |                                                      |                |
| Before reaction                                                                                                                                                                       | 1                      | 1860428         | 257843                                       | 169779          | 0.0921                                                                                                             | 0.0933                                     | 0.823                                                    | T <sub>a</sub> (°C)                                      | 24.7                                                |                                                      |                |
|                                                                                                                                                                                       | 2                      | 1909740         | 265264                                       | 174914          | 0.0925                                                                                                             |                                            |                                                          | 0.823                                                    | P <sub>0</sub> (hPa)                                | 1013.9                                               |                |
|                                                                                                                                                                                       | 3                      | 2002438         | 278609                                       | 183576          | 0.0926                                                                                                             |                                            |                                                          | 0.822                                                    | Flow (cc/min)                                       |                                                      |                |
| After reaction                                                                                                                                                                        | 4                      | 2448060         | 345601                                       | 228319          | 0.0942                                                                                                             |                                            |                                                          | 0.824                                                    | H <sub>2</sub>                                      | 16.79                                                |                |
|                                                                                                                                                                                       | 5                      | 2476535         | 349756                                       | 230832          | 0.0941                                                                                                             |                                            |                                                          | 0.823                                                    | O <sub>2</sub>                                      | 20.75                                                |                |
|                                                                                                                                                                                       | 6                      | 2502349         | 353496                                       | 233293          | 0.0941                                                                                                             |                                            |                                                          | 0.823                                                    | N <sub>2</sub>                                      | 16.63                                                |                |
| Time                                                                                                                                                                                  |                        |                 |                                              | GC count        |                                                                                                                    |                                            | t <sub>correct</sub> (min)                               | Outlet flow (sccm)                                       |                                                     | Conversion(%)                                        |                |
| H                                                                                                                                                                                     | M                      | S               | min.                                         | H <sub>2</sub>  | O <sub>2</sub>                                                                                                     | N <sub>2</sub>                             |                                                          | H <sub>2</sub>                                           | O <sub>2</sub>                                      | H <sub>2</sub>                                       | O <sub>2</sub> |
| 14                                                                                                                                                                                    | 22                     | 36              | 4.0                                          | 436033          | 110619                                                                                                             | 228715                                     | 0.00                                                     | 6.81                                                     | 11.40                                               | 54.38                                                | 38.23          |
| 14                                                                                                                                                                                    | 32                     | 38              | 14.0                                         | 769613          | 159707                                                                                                             | 191361                                     | 7.85                                                     | 6.56                                                     | 11.45                                               | 56.07                                                | 37.96          |
| 14                                                                                                                                                                                    | 42                     | 42              | 24.1                                         | 824878          | 172913                                                                                                             | 186585                                     | 17.92                                                    | 6.24                                                     | 11.52                                               | 58.21                                                | 37.61          |
| 14                                                                                                                                                                                    | 52                     | 44              | 34.1                                         | 820782          | 181498                                                                                                             | 190953                                     | 27.95                                                    | 5.93                                                     | 11.57                                               | 60.30                                                | 37.31          |
| 15                                                                                                                                                                                    | 2                      | 48              | 44.2                                         | 790015          | 185720                                                                                                             | 194022                                     | 38.02                                                    | 5.62                                                     | 11.66                                               | 62.39                                                | 36.87          |
| 15                                                                                                                                                                                    | 12                     | 50              | 54.2                                         | 765475          | 190757                                                                                                             | 198596                                     | 48.05                                                    | 5.32                                                     | 11.70                                               | 64.40                                                | 36.65          |
| 15                                                                                                                                                                                    | 22                     | 54              | 64.3                                         | 687186          | 193218                                                                                                             | 204238                                     | 58.12                                                    | 4.64                                                     | 11.52                                               | 68.92                                                | 37.60          |
| 15                                                                                                                                                                                    | 32                     | 56              | 74.3                                         | 668767          | 195782                                                                                                             | 205782                                     | 68.15                                                    | 4.48                                                     | 11.58                                               | 69.98                                                | 37.25          |
| 15                                                                                                                                                                                    | 43                     | 0               | 84.4                                         | 698505          | 202949                                                                                                             | 211219                                     | 78.22                                                    | 4.56                                                     | 11.70                                               | 69.45                                                | 36.63          |
| 15                                                                                                                                                                                    | 53                     | 2               | 94.4                                         | 713750          | 206520                                                                                                             | 213420                                     | 88.25                                                    | 4.61                                                     | 11.78                                               | 69.11                                                | 36.18          |
| 16                                                                                                                                                                                    | 3                      | 6               | 104.5                                        | 721689          | 207707                                                                                                             | 213229                                     | 98.32                                                    | 4.67                                                     | 11.86                                               | 68.74                                                | 35.75          |
| 16                                                                                                                                                                                    | 13                     | 8               | 114.5                                        | 728753          | 208338                                                                                                             | 212263                                     | 108.35                                                   | 4.74                                                     | 11.95                                               | 68.29                                                | 35.26          |
| 16                                                                                                                                                                                    | 23                     | 12              | 124.6                                        | 736748          | 209783                                                                                                             | 212282                                     | 118.42                                                   | 4.79                                                     | 12.03                                               | 67.94                                                | 34.82          |
| t <sub>correct</sub> (min)                                                                                                                                                            | Partial pressure (kPa) |                 | Rate (mmol L <sup>-1</sup> h <sup>-1</sup> ) |                 | d[H <sub>2</sub> O <sub>2</sub> ]/dt (mmol L <sup>-1</sup> h <sup>-1</sup> )                                       | Σ[H <sub>2</sub> ] (mmol L <sup>-1</sup> ) | [H <sub>2</sub> O <sub>2</sub> ] (mmol L <sup>-1</sup> ) | S <sub>e</sub> (—)                                       | Σ <sub>2</sub> [H <sub>2</sub> O <sub>2</sub> ] (h) | Σ <sub>1</sub> /[H <sub>2</sub> O <sub>2</sub> ] (—) |                |
|                                                                                                                                                                                       | P <sub>H2</sub>        | P <sub>O2</sub> | r <sub>H2</sub>                              | r <sub>O2</sub> |                                                                                                                    |                                            |                                                          |                                                          |                                                     |                                                      |                |
| 0.00                                                                                                                                                                                  | 20.12                  | 33.67           | 72.54                                        | 63.01           | 53.49                                                                                                              | 0.00                                       | 0.00                                                     |                                                          | 0.000                                               | 0.000                                                |                |
| 7.85                                                                                                                                                                                  | 19.49                  | 34.02           | 74.79                                        | 62.56           | 50.34                                                                                                              | 9.64                                       | 6.80                                                     | 0.70                                                     | 0.065                                               | 1.419                                                |                |
| 17.92                                                                                                                                                                                 | 18.69                  | 34.48           | 77.64                                        | 62.00           | 46.36                                                                                                              | 22.43                                      | 14.91                                                    | 0.66                                                     | 0.152                                               | 1.505                                                |                |
| 27.95                                                                                                                                                                                 | 17.89                  | 34.92           | 80.42                                        | 61.50           | 42.58                                                                                                              | 35.64                                      | 22.34                                                    | 0.63                                                     | 0.241                                               | 1.595                                                |                |
| 38.02                                                                                                                                                                                 | 17.07                  | 35.42           | 83.21                                        | 60.77           | 38.33                                                                                                              | 49.37                                      | 29.13                                                    | 0.59                                                     | 0.333                                               | 1.695                                                |                |
| 48.05                                                                                                                                                                                 | 16.29                  | 35.83           | 85.89                                        | 60.41           | 34.93                                                                                                              | 63.51                                      | 35.26                                                    | 0.56                                                     | 0.428                                               | 1.801                                                |                |
| 58.12                                                                                                                                                                                 | 14.61                  | 36.25           | 91.92                                        | 61.98           | 32.04                                                                                                              | 78.43                                      | 40.87                                                    | 0.52                                                     | 0.525                                               | 1.919                                                |                |
| 68.15                                                                                                                                                                                 | 14.16                  | 36.57           | 93.34                                        | 61.40           | 29.46                                                                                                              | 93.92                                      | 46.02                                                    | 0.49                                                     | 0.624                                               | 2.041                                                |                |
| 78.22                                                                                                                                                                                 | 14.31                  | 36.70           | 92.63                                        | 60.37           | 28.11                                                                                                              | 109.52                                     | 50.85                                                    | 0.46                                                     | 0.725                                               | 2.154                                                |                |
| 88.25                                                                                                                                                                                 | 14.41                  | 36.80           | 92.17                                        | 59.63           | 27.09                                                                                                              | 124.97                                     | 55.46                                                    | 0.44                                                     | 0.825                                               | 2.253                                                |                |
| 98.32                                                                                                                                                                                 | 14.53                  | 36.89           | 91.68                                        | 58.93           | 26.19                                                                                                              | 140.39                                     | 59.93                                                    | 0.43                                                     | 0.925                                               | 2.343                                                |                |
| 108.35                                                                                                                                                                                | 14.66                  | 36.99           | 91.08                                        | 58.13           | 25.18                                                                                                              | 155.67                                     | 64.22                                                    | 0.41                                                     | 1.025                                               | 2.424                                                |                |
| 118.42                                                                                                                                                                                | 14.76                  | 37.08           | 90.62                                        | 57.40           | 24.17                                                                                                              | 170.92                                     | 68.36                                                    | 0.40                                                     | 1.125                                               | 2.500                                                |                |



## H<sub>2</sub>O<sub>2</sub> Synthesis Data Sheet

Entry No. 24 (Exp. T377) Employed in: Table 3

| Catalyst, Additives                                                                                                                                           |                        |                 | Reaction conditions                          |                 | Gas feed rate (sccm)                                                                                               |                                            |                                                          |                                                          |                                                     |                                                      |                |
|---------------------------------------------------------------------------------------------------------------------------------------------------------------|------------------------|-----------------|----------------------------------------------|-----------------|--------------------------------------------------------------------------------------------------------------------|--------------------------------------------|----------------------------------------------------------|----------------------------------------------------------|-----------------------------------------------------|------------------------------------------------------|----------------|
| Name                                                                                                                                                          | Conc.                  | (Unit)          | T <sub>0</sub> (°C)                          | 22.1            |                                                                                                                    | H <sub>2</sub>                             | O <sub>2</sub>                                           | N <sub>2</sub>                                           | Sum                                                 |                                                      |                |
| Pd-PVP                                                                                                                                                        | 8.29                   | (mg/L)          | T (°C)                                       | 30.1            | Set                                                                                                                | 15.00                                      | 20.00                                                    | 15.00                                                    | 50.00                                               |                                                      |                |
| Pt(NH <sub>3</sub> ) <sub>4</sub> (NO <sub>3</sub> ) <sub>2</sub>                                                                                             | 0.0833                 | (mg-Pt/L)       | P <sub>0</sub> (hPa)                         | 1009.4          | Calibrated                                                                                                         | 15.16                                      | 18.42                                                    | 14.60                                                    | 48.19                                               |                                                      |                |
| H <sub>2</sub> SO <sub>4</sub>                                                                                                                                | 0.01                   | (N)             | P (hPa)                                      | 1014.3          | Determination of final [H <sub>2</sub> O <sub>2</sub> ]                                                            | Sample (g)                                 | Absorbance (—)                                           | [H <sub>2</sub> O <sub>2</sub> ] (mmol L <sup>-1</sup> ) |                                                     |                                                      |                |
| NaBr                                                                                                                                                          | 0.001                  | (N)             | Agitation (rpm)                              | 1200            |                                                                                                                    |                                            |                                                          |                                                          | 0.525                                               | 1.161                                                | 76.24          |
| Comment:<br>Catalyst activation: H <sub>2</sub> gas 20 sccm at 303 K for 40 min.<br>Treatment of activated catalyst: N <sub>2</sub> 50 sccm at 303 K for 2 h. |                        |                 |                                              |                 | Analysis of H <sub>2</sub> O <sub>2</sub> formation selectivity and H <sub>2</sub> O <sub>2</sub> destruction rate |                                            |                                                          | S <sub>f</sub> (—)                                       | 0.9146                                              |                                                      |                |
|                                                                                                                                                               |                        |                 |                                              |                 |                                                                                                                    |                                            |                                                          | k <sub>d</sub> [Cat] (h <sup>-1</sup> )                  | 1.0727                                              |                                                      |                |
|                                                                                                                                                               |                        |                 |                                              |                 |                                                                                                                    |                                            |                                                          | R <sup>2</sup>                                           | 0.9828                                              |                                                      |                |
| GC calibration                                                                                                                                                |                        | GC count        |                                              |                 | Ratio of sensitivity (toward N <sub>2</sub> )                                                                      |                                            | Feed gas measurement                                     |                                                          |                                                     |                                                      |                |
| Timing                                                                                                                                                        | No.                    | H <sub>2</sub>  | O <sub>2</sub>                               | N <sub>2</sub>  | H <sub>2</sub>                                                                                                     | O <sub>2</sub>                             |                                                          |                                                          |                                                     |                                                      |                |
| Before reaction                                                                                                                                               | 1                      | 2395507         | 338432                                       | 218200          | 0.0946                                                                                                             | 0.0947                                     | 0.813                                                    | T <sub>a</sub> (°C)                                      | 21.0                                                |                                                      |                |
|                                                                                                                                                               | 2                      | 2504099         | 354668                                       | 228637          | 0.0948                                                                                                             |                                            |                                                          | 0.813                                                    | P <sub>0</sub> (hPa)                                | 1011.9                                               |                |
|                                                                                                                                                               | 3                      | 2515834         | 356331                                       | 229913          | 0.0949                                                                                                             |                                            |                                                          | 0.814                                                    | Flow (cc/min)                                       |                                                      |                |
| After reaction                                                                                                                                                | 4                      | 2486073         | 351542                                       | 226652          | 0.0947                                                                                                             |                                            |                                                          | 0.813                                                    | H <sub>2</sub>                                      | 16.76                                                |                |
|                                                                                                                                                               | 5                      | 2434911         | 343803                                       | 221721          | 0.0946                                                                                                             |                                            |                                                          | 0.814                                                    | O <sub>2</sub>                                      | 20.36                                                |                |
|                                                                                                                                                               | 6                      | 2480777         | 350865                                       | 226167          | 0.0947                                                                                                             |                                            |                                                          | 0.813                                                    | N <sub>2</sub>                                      | 16.14                                                |                |
| Time                                                                                                                                                          |                        |                 |                                              | GC count        |                                                                                                                    |                                            | t <sub>correct</sub> (min)                               | Outlet flow (sccm)                                       |                                                     | Conversion(%)                                        |                |
| H                                                                                                                                                             | M                      | S               | min.                                         | H <sub>2</sub>  | O <sub>2</sub>                                                                                                     | N <sub>2</sub>                             |                                                          | H <sub>2</sub>                                           | O <sub>2</sub>                                      | H <sub>2</sub>                                       | O <sub>2</sub> |
| 14                                                                                                                                                            | 28                     | 44              | 4.0                                          | 514711          | 89772                                                                                                              | 329891                                     | 0.00                                                     | 7.69                                                     | 11.01                                               | 49.28                                                | 40.26          |
| 14                                                                                                                                                            | 38                     | 46              | 14.0                                         | 825686          | 167172                                                                                                             | 234427                                     | 7.52                                                     | 7.03                                                     | 10.95                                               | 53.64                                                | 40.58          |
| 14                                                                                                                                                            | 48                     | 50              | 24.1                                         | 902521          | 198318                                                                                                             | 230807                                     | 17.58                                                    | 6.19                                                     | 10.87                                               | 59.19                                                | 40.99          |
| 14                                                                                                                                                            | 58                     | 52              | 34.1                                         | 843287          | 199777                                                                                                             | 221195                                     | 27.62                                                    | 5.27                                                     | 10.73                                               | 65.23                                                | 41.76          |
| 15                                                                                                                                                            | 8                      | 56              | 44.2                                         | 761941          | 197886                                                                                                             | 216161                                     | 37.68                                                    | 4.87                                                     | 10.87                                               | 67.85                                                | 40.97          |
| 15                                                                                                                                                            | 18                     | 58              | 54.2                                         | 601527          | 194286                                                                                                             | 217696                                     | 47.72                                                    | 3.82                                                     | 10.60                                               | 74.80                                                | 42.45          |
| 15                                                                                                                                                            | 29                     | 0               | 64.3                                         | 601451          | 196133                                                                                                             | 217201                                     | 57.75                                                    | 3.83                                                     | 10.73                                               | 74.75                                                | 41.77          |
| 15                                                                                                                                                            | 39                     | 4               | 74.3                                         | 614875          | 200833                                                                                                             | 220691                                     | 67.82                                                    | 3.85                                                     | 10.81                                               | 74.59                                                | 41.32          |
| 15                                                                                                                                                            | 49                     | 6               | 84.4                                         | 610707          | 200040                                                                                                             | 218461                                     | 77.85                                                    | 3.87                                                     | 10.88                                               | 74.51                                                | 40.96          |
| 15                                                                                                                                                            | 59                     | 10              | 94.4                                         | 637773          | 208913                                                                                                             | 226553                                     | 87.92                                                    | 3.89                                                     | 10.95                                               | 74.33                                                | 40.54          |
| 16                                                                                                                                                            | 9                      | 12              | 104.5                                        | 632283          | 207269                                                                                                             | 223283                                     | 97.95                                                    | 3.92                                                     | 11.03                                               | 74.18                                                | 40.14          |
| 16                                                                                                                                                            | 19                     | 16              | 114.5                                        | 650399          | 213088                                                                                                             | 228143                                     | 108.02                                                   | 3.94                                                     | 11.09                                               | 74.00                                                | 39.77          |
| 16                                                                                                                                                            | 29                     | 18              | 124.6                                        | 649803          | 213656                                                                                                             | 227566                                     | 118.05                                                   | 3.95                                                     | 11.15                                               | 73.96                                                | 39.46          |
| t <sub>correct</sub> (min)                                                                                                                                    | Partial pressure (kPa) |                 | Rate (mmol L <sup>-1</sup> h <sup>-1</sup> ) |                 | d[H <sub>2</sub> O <sub>2</sub> ]/dt (mmol L <sup>-1</sup> h <sup>-1</sup> )                                       | Σ[H <sub>2</sub> ] (mmol L <sup>-1</sup> ) | [H <sub>2</sub> O <sub>2</sub> ] (mmol L <sup>-1</sup> ) | S <sub>e</sub> (—)                                       | Σ <sub>2</sub> [H <sub>2</sub> O <sub>2</sub> ] (h) | Σ <sub>1</sub> /[H <sub>2</sub> O <sub>2</sub> ] (—) |                |
|                                                                                                                                                               | P <sub>H2</sub>        | P <sub>O2</sub> | r <sub>H2</sub>                              | r <sub>O2</sub> |                                                                                                                    |                                            |                                                          |                                                          |                                                     |                                                      |                |
| 0.00                                                                                                                                                          | 22.46                  | 32.14           | 66.72                                        | 66.21           | 65.70                                                                                                              | 0.00                                       | 0.00                                                     |                                                          | 0.000                                               | 0.000                                                |                |
| 7.52                                                                                                                                                          | 20.98                  | 32.67           | 72.63                                        | 66.74           | 60.85                                                                                                              | 8.73                                       | 7.93                                                     | 0.91                                                     | 0.063                                               | 1.101                                                |                |
| 17.58                                                                                                                                                         | 19.00                  | 33.38           | 80.15                                        | 67.41           | 54.68                                                                                                              | 21.54                                      | 17.62                                                    | 0.82                                                     | 0.150                                               | 1.223                                                |                |
| 27.62                                                                                                                                                         | 16.74                  | 34.07           | 88.32                                        | 68.69           | 49.06                                                                                                              | 35.63                                      | 26.29                                                    | 0.74                                                     | 0.240                                               | 1.355                                                |                |
| 37.68                                                                                                                                                         | 15.61                  | 34.82           | 91.87                                        | 67.39           | 42.90                                                                                                              | 50.75                                      | 34.01                                                    | 0.67                                                     | 0.334                                               | 1.492                                                |                |
| 47.72                                                                                                                                                         | 12.79                  | 35.49           | 101.28                                       | 69.83           | 38.37                                                                                                              | 66.90                                      | 40.80                                                    | 0.61                                                     | 0.432                                               | 1.639                                                |                |
| 57.75                                                                                                                                                         | 12.76                  | 35.74           | 101.20                                       | 68.71           | 36.21                                                                                                              | 83.83                                      | 47.04                                                    | 0.56                                                     | 0.531                                               | 1.782                                                |                |
| 67.82                                                                                                                                                         | 12.79                  | 35.89           | 100.99                                       | 67.96           | 34.93                                                                                                              | 100.79                                     | 53.01                                                    | 0.53                                                     | 0.629                                               | 1.901                                                |                |
| 77.85                                                                                                                                                         | 12.80                  | 36.01           | 100.88                                       | 67.36           | 33.85                                                                                                              | 117.67                                     | 58.76                                                    | 0.50                                                     | 0.727                                               | 2.003                                                |                |
| 87.92                                                                                                                                                         | 12.85                  | 36.14           | 100.64                                       | 66.68           | 32.72                                                                                                              | 134.57                                     | 64.34                                                    | 0.48                                                     | 0.824                                               | 2.091                                                |                |
| 97.95                                                                                                                                                         | 12.88                  | 36.26           | 100.43                                       | 66.03           | 31.62                                                                                                              | 151.38                                     | 69.72                                                    | 0.46                                                     | 0.921                                               | 2.171                                                |                |
| 108.02                                                                                                                                                        | 12.93                  | 36.37           | 100.19                                       | 65.42           | 30.64                                                                                                              | 168.21                                     | 74.95                                                    | 0.45                                                     | 1.019                                               | 2.244                                                |                |
| 118.05                                                                                                                                                        | 12.92                  | 36.48           | 100.14                                       | 64.90           | 29.67                                                                                                              | 184.96                                     | 79.99                                                    | 0.43                                                     | 1.117                                               | 2.312                                                |                |

## H<sub>2</sub>O<sub>2</sub> Synthesis Data Sheet

Entry No. 25 (Exp. Y02) Employed in: Fig 4 Fig 5 Fig 9 Fig 10 Fig 11

| Catalyst, Additives                                                              |                        |                 |                                              | Reaction conditions |                                                                                                                    | Gas feed rate (sccm)                       |                                                          |                                                          |                                                     |                                                      |       |
|----------------------------------------------------------------------------------|------------------------|-----------------|----------------------------------------------|---------------------|--------------------------------------------------------------------------------------------------------------------|--------------------------------------------|----------------------------------------------------------|----------------------------------------------------------|-----------------------------------------------------|------------------------------------------------------|-------|
| Name                                                                             | Conc.                  | (Unit)          | T <sub>0</sub> (°C)                          | 22.8                |                                                                                                                    | H <sub>2</sub>                             | O <sub>2</sub>                                           | N <sub>2</sub>                                           | Sum                                                 |                                                      |       |
| Pd-PVP                                                                           | 8.33                   | (mg/L)          | T (°C)                                       | 29.9                | Set                                                                                                                | 10.00                                      | 20.00                                                    | 20.00                                                    | 50.00                                               |                                                      |       |
|                                                                                  |                        |                 | P <sub>0</sub> (hPa)                         | 1006.6              | Calibrated                                                                                                         | 10.20                                      | 18.55                                                    | 19.86                                                    | 48.60                                               |                                                      |       |
| H <sub>2</sub> SO <sub>4</sub>                                                   | 0.01                   | (N)             | P (hPa)                                      | 1014.0              | Determination of final [H <sub>2</sub> O <sub>2</sub> ]                                                            | Sample (g)                                 | Absorbance (—)                                           | [H <sub>2</sub> O <sub>2</sub> ] (mmol L <sup>-1</sup> ) |                                                     |                                                      |       |
| NaBr                                                                             | 0.001                  | (N)             | Agitation (rpm)                              | 1200                |                                                                                                                    |                                            |                                                          |                                                          | 0.672                                               | 0.541                                                | 27.55 |
| Comment:<br>Catalyst activation: H <sub>2</sub> gas 20 sccm at 303 K for 40 min. |                        |                 |                                              |                     | Analysis of H <sub>2</sub> O <sub>2</sub> formation selectivity and H <sub>2</sub> O <sub>2</sub> destruction rate |                                            |                                                          | S <sub>f</sub> (—)                                       | 0.8753                                              |                                                      |       |
|                                                                                  |                        |                 |                                              |                     |                                                                                                                    |                                            |                                                          | k <sub>d</sub> [Cat] (h <sup>-1</sup> )                  | 0.4713                                              |                                                      |       |
|                                                                                  |                        |                 |                                              |                     |                                                                                                                    |                                            |                                                          | R <sup>2</sup>                                           | 0.9998                                              |                                                      |       |
| GC calibration                                                                   |                        | GC count        |                                              |                     | Ratio of sensitivity (toward N <sub>2</sub> )                                                                      |                                            | Feed gas measurement                                     |                                                          |                                                     |                                                      |       |
| Timing                                                                           | No.                    | H <sub>2</sub>  | O <sub>2</sub>                               | N <sub>2</sub>      | H <sub>2</sub>                                                                                                     | O <sub>2</sub>                             |                                                          |                                                          |                                                     |                                                      |       |
| Before reaction                                                                  | 1                      | 966067          | 194223                                       | 171201              | 0.0910                                                                                                             | 0.0910                                     | 0.823                                                    | T <sub>a</sub> (°C)                                      | 22.6                                                |                                                      |       |
|                                                                                  | 2                      | 966037          | 194091                                       | 171085              | 0.0909                                                                                                             |                                            |                                                          | 0.823                                                    | P <sub>0</sub> (hPa)                                | 1005.0                                               |       |
|                                                                                  | 3                      | 966259          | 194222                                       | 171022              | 0.0909                                                                                                             |                                            |                                                          | 0.822                                                    | Flow (cc/min)                                       |                                                      |       |
| After reaction                                                                   | 4                      | 965237          | 194114                                       | 170742              | 0.0908                                                                                                             | 0.0910                                     | 0.823                                                    | H <sub>2</sub>                                           | 11.44                                               |                                                      |       |
|                                                                                  | 5                      | 965596          | 194249                                       | 171215              | 0.0910                                                                                                             |                                            |                                                          | 0.823                                                    | O <sub>2</sub>                                      | 20.81                                                |       |
|                                                                                  | 6                      | 968319          | 194966                                       | 171818              | 0.0911                                                                                                             |                                            |                                                          | 0.823                                                    | N <sub>2</sub>                                      | 22.28                                                |       |
| Time                                                                             |                        | GC count        |                                              |                     | t <sub>correct</sub> (min)                                                                                         | Outlet flow (sccm)                         |                                                          | Conversion(%)                                            |                                                     |                                                      |       |
| H                                                                                | M                      | S               | min.                                         | H <sub>2</sub>      |                                                                                                                    | O <sub>2</sub>                             | N <sub>2</sub>                                           | H <sub>2</sub>                                           | O <sub>2</sub>                                      |                                                      |       |
| 15                                                                               | 55                     | 54              | 4.0                                          | 514854              | 105818                                                                                                             | 266719                                     | 0.00                                                     | 7.79                                                     | 16.30                                               | 23.63                                                | 12.13 |
| 16                                                                               | 5                      | 58              | 14.1                                         | 766868              | 178028                                                                                                             | 190699                                     | 9.53                                                     | 7.73                                                     | 16.32                                               | 24.16                                                | 12.04 |
| 16                                                                               | 16                     | 0               | 24.1                                         | 780060              | 183524                                                                                                             | 184524                                     | 19.56                                                    | 7.68                                                     | 16.33                                               | 24.72                                                | 11.94 |
| 16                                                                               | 26                     | 4               | 34.2                                         | 777154              | 184354                                                                                                             | 184265                                     | 29.63                                                    | 7.62                                                     | 16.35                                               | 25.28                                                | 11.86 |
| 16                                                                               | 36                     | 6               | 44.2                                         | 773085              | 185099                                                                                                             | 184689                                     | 39.66                                                    | 7.56                                                     | 16.38                                               | 25.84                                                | 11.71 |
| 16                                                                               | 46                     | 10              | 54.3                                         | 769012              | 185601                                                                                                             | 185106                                     | 49.73                                                    | 7.50                                                     | 16.38                                               | 26.40                                                | 11.67 |
| 16                                                                               | 56                     | 12              | 64.3                                         | 761274              | 185119                                                                                                             | 184286                                     | 59.76                                                    | 7.46                                                     | 16.41                                               | 26.82                                                | 11.51 |
| 17                                                                               | 6                      | 16              | 74.4                                         | 755755              | 185544                                                                                                             | 185091                                     | 69.83                                                    | 7.38                                                     | 16.38                                               | 27.66                                                | 11.69 |
| 17                                                                               | 16                     | 18              | 84.4                                         | 750658              | 185809                                                                                                             | 185117                                     | 79.86                                                    | 7.32                                                     | 16.40                                               | 28.16                                                | 11.57 |
| 17                                                                               | 26                     | 22              | 94.5                                         | 744993              | 185973                                                                                                             | 185135                                     | 89.93                                                    | 7.27                                                     | 16.41                                               | 28.71                                                | 11.51 |
| 17                                                                               | 36                     | 24              | 104.5                                        | 741576              | 186422                                                                                                             | 185491                                     | 99.96                                                    | 7.22                                                     | 16.42                                               | 29.17                                                | 11.46 |
| 17                                                                               | 46                     | 28              | 114.6                                        | 737631              | 186625                                                                                                             | 185748                                     | 110.03                                                   | 7.17                                                     | 16.42                                               | 29.65                                                | 11.49 |
| 17                                                                               | 56                     | 30              | 124.6                                        | 734368              | 186733                                                                                                             | 185444                                     | 120.06                                                   | 7.15                                                     | 16.45                                               | 29.84                                                | 11.29 |
| t <sub>correct</sub> (min)                                                       | Partial pressure (kPa) |                 | Rate (mmol L <sup>-1</sup> h <sup>-1</sup> ) |                     | d[H <sub>2</sub> O <sub>2</sub> ]/dt (mmol L <sup>-1</sup> h <sup>-1</sup> )                                       | Σ[H <sub>2</sub> ] (mmol L <sup>-1</sup> ) | [H <sub>2</sub> O <sub>2</sub> ] (mmol L <sup>-1</sup> ) | S <sub>e</sub> (—)                                       | Σ <sub>2</sub> [H <sub>2</sub> O <sub>2</sub> ] (h) | Σ <sub>1</sub> /[H <sub>2</sub> O <sub>2</sub> ] (—) |       |
| 0.00                                                                             | P <sub>H2</sub>        | P <sub>O2</sub> | r <sub>H2</sub>                              | r <sub>O2</sub>     |                                                                                                                    |                                            |                                                          |                                                          |                                                     |                                                      |       |
| 0.00                                                                             | 17.22                  | 36.04           | 21.51                                        | 20.08               | 18.66                                                                                                              | 0.00                                       | 0.00                                                     |                                                          | 0.000                                               | 0.000                                                |       |
| 9.53                                                                             | 17.11                  | 36.11           | 21.99                                        | 19.93               | 17.87                                                                                                              | 3.45                                       | 2.90                                                     | 0.84                                                     | 0.079                                               | 1.191                                                |       |
| 19.56                                                                            | 17.00                  | 36.18           | 22.51                                        | 19.77               | 17.04                                                                                                              | 7.17                                       | 5.82                                                     | 0.81                                                     | 0.165                                               | 1.233                                                |       |
| 29.63                                                                            | 16.89                  | 36.25           | 23.02                                        | 19.64               | 16.27                                                                                                              | 10.99                                      | 8.61                                                     | 0.78                                                     | 0.252                                               | 1.276                                                |       |
| 39.66                                                                            | 16.78                  | 36.33           | 23.53                                        | 19.39               | 15.25                                                                                                              | 14.88                                      | 11.25                                                    | 0.76                                                     | 0.341                                               | 1.323                                                |       |
| 49.73                                                                            | 16.67                  | 36.39           | 24.03                                        | 19.32               | 14.61                                                                                                              | 18.87                                      | 13.75                                                    | 0.73                                                     | 0.431                                               | 1.372                                                |       |
| 59.76                                                                            | 16.58                  | 36.47           | 24.41                                        | 19.05               | 13.69                                                                                                              | 22.93                                      | 16.12                                                    | 0.70                                                     | 0.523                                               | 1.422                                                |       |
| 69.83                                                                            | 16.43                  | 36.49           | 25.18                                        | 19.36               | 13.53                                                                                                              | 27.09                                      | 18.40                                                    | 0.68                                                     | 0.615                                               | 1.472                                                |       |
| 79.86                                                                            | 16.33                  | 36.56           | 25.64                                        | 19.17               | 12.70                                                                                                              | 31.34                                      | 20.60                                                    | 0.66                                                     | 0.708                                               | 1.521                                                |       |
| 89.93                                                                            | 16.22                  | 36.63           | 26.14                                        | 19.05               | 11.97                                                                                                              | 35.68                                      | 22.67                                                    | 0.64                                                     | 0.803                                               | 1.574                                                |       |
| 99.96                                                                            | 16.13                  | 36.68           | 26.56                                        | 18.98               | 11.40                                                                                                              | 40.08                                      | 24.62                                                    | 0.61                                                     | 0.900                                               | 1.628                                                |       |
| 110.03                                                                           | 16.04                  | 36.71           | 26.99                                        | 19.02               | 11.06                                                                                                              | 44.58                                      | 26.50                                                    | 0.59                                                     | 0.998                                               | 1.682                                                |       |
| 120.06                                                                           | 15.99                  | 36.78           | 27.17                                        | 18.70               | 10.23                                                                                                              | 49.10                                      | 28.28                                                    | 0.58                                                     | 1.097                                               | 1.736                                                |       |

## H<sub>2</sub>O<sub>2</sub> Synthesis Data Sheet

Entry No. 26 (Exp. Y23) Employed in: Fig 4 Fig 5 Fig 9 Fig 10 Fig 11

| Catalyst, Additives                                                              |                        |                 |                                              | Reaction conditions |                                                                                                                    | Gas feed rate (sccm)                       |                                                          |                                                          |                                                     |                                                      |                |
|----------------------------------------------------------------------------------|------------------------|-----------------|----------------------------------------------|---------------------|--------------------------------------------------------------------------------------------------------------------|--------------------------------------------|----------------------------------------------------------|----------------------------------------------------------|-----------------------------------------------------|------------------------------------------------------|----------------|
| Name                                                                             | Conc.                  | (Unit)          | T <sub>0</sub> (°C)                          | 25.7                |                                                                                                                    | H <sub>2</sub>                             | O <sub>2</sub>                                           | N <sub>2</sub>                                           | Sum                                                 |                                                      |                |
| Pd-PVP                                                                           | 8.33                   | (mg/L)          | T (°C)                                       | 30.2                | Set                                                                                                                | 10.00                                      | 20.00                                                    | 20.00                                                    | 50.00                                               |                                                      |                |
|                                                                                  |                        |                 | P <sub>0</sub> (hPa)                         | 994.0               | Calibrated                                                                                                         | 10.12                                      | 18.43                                                    | 20.19                                                    |                                                     |                                                      |                |
| H <sub>2</sub> SO <sub>4</sub>                                                   | 0.01                   | (N)             | P (hPa)                                      | 1001.3              | Determination of final [H <sub>2</sub> O <sub>2</sub> ]                                                            | Sample (g)                                 | Absorbance (—)                                           | [H <sub>2</sub> O <sub>2</sub> ] (mmol L <sup>-1</sup> ) |                                                     |                                                      |                |
| NaBr                                                                             | 0.001                  | (N)             | Agitation (rpm)                              | 1198                |                                                                                                                    |                                            |                                                          |                                                          |                                                     | 0.432                                                | 0.362          |
| Comment:<br>Catalyst activation: H <sub>2</sub> gas 20 sccm at 303 K for 40 min. |                        |                 |                                              |                     | Analysis of H <sub>2</sub> O <sub>2</sub> formation selectivity and H <sub>2</sub> O <sub>2</sub> destruction rate |                                            |                                                          | S <sub>f</sub> (—)                                       | 0.8630                                              |                                                      |                |
|                                                                                  |                        |                 |                                              |                     |                                                                                                                    |                                            |                                                          | k <sub>d</sub> [Cat] (h <sup>-1</sup> )                  | 0.5812                                              |                                                      |                |
|                                                                                  |                        |                 |                                              |                     |                                                                                                                    |                                            |                                                          | R <sup>2</sup>                                           | 0.9992                                              |                                                      |                |
| GC calibration                                                                   |                        | GC count        |                                              |                     | Ratio of sensitivity (toward N <sub>2</sub> )                                                                      |                                            | Feed gas measurement                                     |                                                          |                                                     |                                                      |                |
| Timing                                                                           | No.                    | H <sub>2</sub>  | O <sub>2</sub>                               | N <sub>2</sub>      | H <sub>2</sub>                                                                                                     | O <sub>2</sub>                             |                                                          |                                                          |                                                     |                                                      |                |
| Before reaction                                                                  | 1                      | 985816          | 196328                                       | 171127              | 0.0870                                                                                                             | 0.0869                                     | 0.796                                                    | T <sub>a</sub> (°C)                                      | 24.9                                                |                                                      |                |
|                                                                                  | 2                      | 986350          | 196210                                       | 171099              | 0.0869                                                                                                             |                                            |                                                          | P <sub>0</sub> (hPa)                                     | 997.2                                               |                                                      |                |
|                                                                                  | 3                      | 986454          | 196241                                       | 171175              | 0.0870                                                                                                             |                                            |                                                          | Flow (cc/min)                                            |                                                     |                                                      |                |
| After reaction                                                                   | 4                      | 984296          | 195839                                       | 170712              | 0.0869                                                                                                             | 0.0869                                     | 0.796                                                    | H <sub>2</sub>                                           | 11.58                                               |                                                      |                |
|                                                                                  | 5                      | 984637          | 195895                                       | 170702              | 0.0869                                                                                                             |                                            |                                                          | O <sub>2</sub>                                           | 21.09                                               |                                                      |                |
|                                                                                  | 6                      | 984357          | 195928                                       | 170723              | 0.0869                                                                                                             |                                            |                                                          | N <sub>2</sub>                                           | 23.11                                               |                                                      |                |
| Time                                                                             |                        |                 |                                              | GC count            |                                                                                                                    |                                            | t <sub>correct</sub> (min)                               | Outlet flow (sccm)                                       |                                                     | Conversion(%)                                        |                |
| H                                                                                | M                      | S               | min.                                         | H <sub>2</sub>      | O <sub>2</sub>                                                                                                     | N <sub>2</sub>                             |                                                          | H <sub>2</sub>                                           | O <sub>2</sub>                                      | H <sub>2</sub>                                       | O <sub>2</sub> |
| 14                                                                               | 45                     | 6               | 4.0                                          | 534208              | 116640                                                                                                             | 263574                                     | 0.00                                                     | 7.68                                                     | 16.17                                               | 24.07                                                | 12.22          |
| 14                                                                               | 55                     | 8               | 14.0                                         | 777463              | 180210                                                                                                             | 189451                                     | 9.53                                                     | 7.59                                                     | 16.17                                               | 25.00                                                | 12.26          |
| 15                                                                               | 5                      | 12              | 24.1                                         | 785398              | 185065                                                                                                             | 184795                                     | 19.60                                                    | 7.49                                                     | 16.16                                               | 25.98                                                | 12.30          |
| 15                                                                               | 15                     | 14              | 34.1                                         | 777345              | 185613                                                                                                             | 184605                                     | 29.63                                                    | 7.39                                                     | 16.15                                               | 26.95                                                | 12.35          |
| 15                                                                               | 25                     | 18              | 44.2                                         | 768096              | 185878                                                                                                             | 184874                                     | 39.70                                                    | 7.29                                                     | 16.15                                               | 27.93                                                | 12.35          |
| 15                                                                               | 35                     | 20              | 54.2                                         | 759057              | 186009                                                                                                             | 185168                                     | 49.73                                                    | 7.19                                                     | 16.14                                               | 28.89                                                | 12.43          |
| 15                                                                               | 45                     | 22              | 64.3                                         | 751110              | 186508                                                                                                             | 185598                                     | 59.77                                                    | 7.10                                                     | 16.14                                               | 29.80                                                | 12.40          |
| 15                                                                               | 55                     | 26              | 74.3                                         | 741720              | 186590                                                                                                             | 185712                                     | 69.83                                                    | 7.01                                                     | 16.14                                               | 30.72                                                | 12.41          |
| 16                                                                               | 5                      | 28              | 84.4                                         | 734063              | 186985                                                                                                             | 186251                                     | 79.87                                                    | 6.92                                                     | 16.13                                               | 31.63                                                | 12.48          |
| 16                                                                               | 15                     | 32              | 94.4                                         | 726658              | 187340                                                                                                             | 186646                                     | 89.93                                                    | 6.83                                                     | 16.12                                               | 32.46                                                | 12.50          |
| 16                                                                               | 25                     | 34              | 104.5                                        | 721204              | 187963                                                                                                             | 187345                                     | 99.97                                                    | 6.76                                                     | 16.12                                               | 33.22                                                | 12.54          |
| 16                                                                               | 35                     | 68              | 115.0                                        | 715768              | 188355                                                                                                             | 187701                                     | 110.53                                                   | 6.69                                                     | 16.12                                               | 33.85                                                | 12.52          |
| 16                                                                               | 45                     | 40              | 124.6                                        | 710799              | 188668                                                                                                             | 187899                                     | 120.07                                                   | 6.64                                                     | 16.13                                               | 34.38                                                | 12.47          |
| t <sub>correct</sub> (min)                                                       | Partial pressure (kPa) |                 | Rate (mmol L <sup>-1</sup> h <sup>-1</sup> ) |                     | d[H <sub>2</sub> O <sub>2</sub> ]/dt (mmol L <sup>-1</sup> h <sup>-1</sup> )                                       | Σ[H <sub>2</sub> ] (mmol L <sup>-1</sup> ) | [H <sub>2</sub> O <sub>2</sub> ] (mmol L <sup>-1</sup> ) | S <sub>e</sub> (—)                                       | Σ <sub>2</sub> [H <sub>2</sub> O <sub>2</sub> ] (h) | Σ <sub>1</sub> /[H <sub>2</sub> O <sub>2</sub> ] (—) |                |
|                                                                                  | P <sub>H2</sub>        | P <sub>O2</sub> | r <sub>H2</sub>                              | r <sub>O2</sub>     |                                                                                                                    |                                            |                                                          |                                                          |                                                     |                                                      |                |
| 0.00                                                                             | 16.73                  | 35.22           | 21.74                                        | 20.10               | 18.46                                                                                                              | 0.00                                       | 0.00                                                     |                                                          | 0.000                                               | 0.000                                                |                |
| 9.53                                                                             | 16.56                  | 35.28           | 22.58                                        | 20.17               | 17.75                                                                                                              | 3.52                                       | 2.88                                                     | 0.82                                                     | 0.079                                               | 1.224                                                |                |
| 19.60                                                                            | 16.38                  | 35.35           | 23.47                                        | 20.23               | 16.99                                                                                                              | 7.38                                       | 5.79                                                     | 0.78                                                     | 0.165                                               | 1.275                                                |                |
| 29.63                                                                            | 16.21                  | 35.42           | 24.35                                        | 20.32               | 16.29                                                                                                              | 11.38                                      | 8.57                                                     | 0.75                                                     | 0.252                                               | 1.328                                                |                |
| 39.70                                                                            | 16.03                  | 35.50           | 25.23                                        | 20.32               | 15.42                                                                                                              | 15.54                                      | 11.23                                                    | 0.72                                                     | 0.340                                               | 1.383                                                |                |
| 49.73                                                                            | 15.85                  | 35.55           | 26.10                                        | 20.45               | 14.81                                                                                                              | 19.83                                      | 13.76                                                    | 0.69                                                     | 0.429                                               | 1.441                                                |                |
| 59.77                                                                            | 15.68                  | 35.64           | 26.92                                        | 20.40               | 13.88                                                                                                              | 24.26                                      | 16.16                                                    | 0.67                                                     | 0.520                                               | 1.502                                                |                |
| 69.83                                                                            | 15.51                  | 35.71           | 27.75                                        | 20.42               | 13.10                                                                                                              | 28.85                                      | 18.42                                                    | 0.64                                                     | 0.614                                               | 1.566                                                |                |
| 79.87                                                                            | 15.34                  | 35.77           | 28.57                                        | 20.54               | 12.50                                                                                                              | 33.56                                      | 20.56                                                    | 0.61                                                     | 0.709                                               | 1.632                                                |                |
| 89.93                                                                            | 15.19                  | 35.83           | 29.32                                        | 20.57               | 11.81                                                                                                              | 38.42                                      | 22.60                                                    | 0.59                                                     | 0.805                                               | 1.700                                                |                |
| 99.97                                                                            | 15.04                  | 35.89           | 30.01                                        | 20.63               | 11.25                                                                                                              | 43.38                                      | 24.53                                                    | 0.57                                                     | 0.902                                               | 1.768                                                |                |
| 110.53                                                                           | 14.92                  | 35.94           | 30.58                                        | 20.60               | 10.63                                                                                                              | 48.71                                      | 26.46                                                    | 0.54                                                     | 1.006                                               | 1.841                                                |                |
| 120.07                                                                           | 14.82                  | 36.00           | 31.05                                        | 20.52               | 9.98                                                                                                               | 53.61                                      | 28.10                                                    | 0.52                                                     | 1.102                                               | 1.908                                                |                |

## H<sub>2</sub>O<sub>2</sub> Synthesis Data Sheet

Entry No. 27 (Exp. Y46) Employed in: Fig 4 Fig 5 Fig 9

| Catalyst, Additives                                                              |                        |                 | Reaction conditions                          |                 | Gas feed rate (sccm)                                                                                               |                                            |                                                          |                                                          |                                                     |                                                      |                |
|----------------------------------------------------------------------------------|------------------------|-----------------|----------------------------------------------|-----------------|--------------------------------------------------------------------------------------------------------------------|--------------------------------------------|----------------------------------------------------------|----------------------------------------------------------|-----------------------------------------------------|------------------------------------------------------|----------------|
| Name                                                                             | Conc.                  | (Unit)          | T <sub>0</sub> (°C)                          | 25.4            |                                                                                                                    | H <sub>2</sub>                             | O <sub>2</sub>                                           | N <sub>2</sub>                                           | Sum                                                 |                                                      |                |
| Pd-PVP                                                                           | 8.33                   | (mg/L)          | T (°C)                                       | 30.2            | Set                                                                                                                | 12.15                                      | 21.78                                                    | 20.00                                                    | 53.93                                               |                                                      |                |
| Pt(NH <sub>3</sub> ) <sub>4</sub> (NO <sub>3</sub> ) <sub>2</sub>                | 0.0167                 | (mg-Pt/L)       | P <sub>0</sub> (hPa)                         | 1002.6          | Calibrated                                                                                                         | 12.22                                      | 20.03                                                    | 20.42                                                    | 52.67                                               |                                                      |                |
| H <sub>2</sub> SO <sub>4</sub>                                                   | 0.01                   | (N)             | P (hPa)                                      | 1010.3          | Determination of final [H <sub>2</sub> O <sub>2</sub> ]                                                            | Sample (g)                                 | Absorbance (—)                                           | [H <sub>2</sub> O <sub>2</sub> ] (mmol L <sup>-1</sup> ) |                                                     |                                                      |                |
| NaBr                                                                             | 0.001                  | (N)             | Agitation (rpm)                              | 1198            |                                                                                                                    |                                            |                                                          |                                                          |                                                     | 0.568                                                | 0.590          |
| Comment:<br>Catalyst activation: H <sub>2</sub> gas 20 sccm at 303 K for 40 min. |                        |                 |                                              |                 | Analysis of H <sub>2</sub> O <sub>2</sub> formation selectivity and H <sub>2</sub> O <sub>2</sub> destruction rate |                                            |                                                          | S <sub>f</sub> (—)                                       | 0.7827                                              |                                                      |                |
|                                                                                  |                        |                 |                                              |                 |                                                                                                                    |                                            |                                                          | k <sub>d</sub> [Cat] (h <sup>-1</sup> )                  | 0.5836                                              |                                                      |                |
|                                                                                  |                        |                 |                                              |                 |                                                                                                                    |                                            |                                                          | R <sup>2</sup>                                           | 0.9999                                              |                                                      |                |
| GC calibration                                                                   |                        | GC count        |                                              |                 | Ratio of sensitivity (toward N <sub>2</sub> )                                                                      |                                            | Feed gas measurement                                     |                                                          |                                                     |                                                      |                |
| Timing                                                                           | No.                    | H <sub>2</sub>  | O <sub>2</sub>                               | N <sub>2</sub>  | H <sub>2</sub>                                                                                                     | O <sub>2</sub>                             |                                                          |                                                          |                                                     |                                                      |                |
| Before reaction                                                                  | 1                      | 1101665         | 197913                                       | 162014          | 0.0880                                                                                                             | 0.0879                                     | 0.803                                                    | T <sub>a</sub> (°C)                                      | 25.3                                                |                                                      |                |
|                                                                                  | 2                      | 1104703         | 198135                                       | 162536          | 0.0881                                                                                                             |                                            |                                                          | 0.804                                                    | P <sub>0</sub> (hPa)                                | 1002.8                                               |                |
|                                                                                  | 3                      | 1103656         | 197720                                       | 162065          | 0.0879                                                                                                             |                                            |                                                          | 0.804                                                    | Flow (cc/min)                                       |                                                      |                |
| After reaction                                                                   | 4                      | 1100326         | 197011                                       | 161291          | 0.0877                                                                                                             | 0.0879                                     | 0.803                                                    | H <sub>2</sub>                                           | 13.94                                               |                                                      |                |
|                                                                                  | 5                      | 1100715         | 197064                                       | 161342          | 0.0877                                                                                                             |                                            |                                                          | 0.803                                                    | O <sub>2</sub>                                      | 22.84                                                |                |
|                                                                                  | 6                      | 1100747         | 197068                                       | 161313          | 0.0877                                                                                                             |                                            |                                                          | 0.803                                                    | N <sub>2</sub>                                      | 23.29                                                |                |
| Time                                                                             |                        |                 |                                              | GC count        |                                                                                                                    |                                            | t <sub>correct</sub> (min)                               | Outlet flow (sccm)                                       |                                                     | Conversion(%)                                        |                |
| H                                                                                | M                      | S               | min.                                         | H <sub>2</sub>  | O <sub>2</sub>                                                                                                     | N <sub>2</sub>                             |                                                          | H <sub>2</sub>                                           | O <sub>2</sub>                                      | H <sub>2</sub>                                       | O <sub>2</sub> |
| 10                                                                               | 13                     | 24              | 4.0                                          | 609414          | 120275                                                                                                             | 255689                                     | 0.00                                                     | 8.38                                                     | 16.62                                               | 31.45                                                | 17.03          |
| 10                                                                               | 23                     | 28              | 14.1                                         | 837567          | 180839                                                                                                             | 186005                                     | 10.04                                                    | 8.28                                                     | 16.66                                               | 32.22                                                | 16.84          |
| 10                                                                               | 33                     | 30              | 24.1                                         | 833645          | 185264                                                                                                             | 182636                                     | 20.07                                                    | 8.19                                                     | 16.70                                               | 33.00                                                | 16.64          |
| 10                                                                               | 43                     | 34              | 34.2                                         | 823535          | 186206                                                                                                             | 182538                                     | 30.14                                                    | 8.10                                                     | 16.73                                               | 33.77                                                | 16.44          |
| 10                                                                               | 53                     | 36              | 44.2                                         | 814549          | 186792                                                                                                             | 182680                                     | 40.17                                                    | 8.00                                                     | 16.77                                               | 34.55                                                | 16.25          |
| 11                                                                               | 3                      | 40              | 54.3                                         | 806716          | 187624                                                                                                             | 183073                                     | 50.24                                                    | 7.91                                                     | 16.81                                               | 35.32                                                | 16.05          |
| 11                                                                               | 13                     | 42              | 64.3                                         | 799247          | 188036                                                                                                             | 183205                                     | 60.27                                                    | 7.83                                                     | 16.84                                               | 35.96                                                | 15.93          |
| 11                                                                               | 23                     | 46              | 74.4                                         | 791984          | 188651                                                                                                             | 183421                                     | 70.34                                                    | 7.75                                                     | 16.87                                               | 36.62                                                | 15.75          |
| 11                                                                               | 33                     | 48              | 84.4                                         | 786381          | 189147                                                                                                             | 183855                                     | 80.37                                                    | 7.67                                                     | 16.88                                               | 37.21                                                | 15.73          |
| 11                                                                               | 43                     | 52              | 94.5                                         | 780942          | 189335                                                                                                             | 183484                                     | 90.44                                                    | 7.64                                                     | 16.93                                               | 37.52                                                | 15.48          |
| 11                                                                               | 53                     | 54              | 104.5                                        | 777336          | 189667                                                                                                             | 183437                                     | 100.47                                                   | 7.60                                                     | 16.96                                               | 37.80                                                | 15.31          |
| 12                                                                               | 3                      | 58              | 114.6                                        | 774832          | 190158                                                                                                             | 183491                                     | 110.54                                                   | 7.58                                                     | 17.00                                               | 38.01                                                | 15.11          |
| 12                                                                               | 14                     | 0               | 124.6                                        | 771868          | 190498                                                                                                             | 183503                                     | 120.57                                                   | 7.55                                                     | 17.03                                               | 38.26                                                | 14.97          |
| t <sub>correct</sub> (min)                                                       | Partial pressure (kPa) |                 | Rate (mmol L <sup>-1</sup> h <sup>-1</sup> ) |                 | d[H <sub>2</sub> O <sub>2</sub> ]/dt (mmol L <sup>-1</sup> h <sup>-1</sup> )                                       | Σ[H <sub>2</sub> ] (mmol L <sup>-1</sup> ) | [H <sub>2</sub> O <sub>2</sub> ] (mmol L <sup>-1</sup> ) | S <sub>e</sub> (—)                                       | Σ <sub>2</sub> [H <sub>2</sub> O <sub>2</sub> ] (h) | Σ <sub>1</sub> /[H <sub>2</sub> O <sub>2</sub> ] (—) |                |
| 0.00                                                                             | P <sub>H2</sub>        | P <sub>O2</sub> | r <sub>H2</sub>                              | r <sub>O2</sub> |                                                                                                                    |                                            |                                                          |                                                          |                                                     |                                                      |                |
| 0.00                                                                             | 17.86                  | 35.41           | 34.32                                        | 30.46           | 26.59                                                                                                              | 0.00                                       | 0.00                                                     |                                                          | 0.000                                               | 0.000                                                |                |
| 10.04                                                                            | 17.68                  | 35.54           | 35.17                                        | 30.10           | 25.04                                                                                                              | 5.81                                       | 4.32                                                     | 0.74                                                     | 0.084                                               | 1.346                                                |                |
| 20.07                                                                            | 17.50                  | 35.67           | 36.02                                        | 29.75           | 23.49                                                                                                              | 11.77                                      | 8.38                                                     | 0.71                                                     | 0.170                                               | 1.404                                                |                |
| 30.14                                                                            | 17.32                  | 35.79           | 36.86                                        | 29.41           | 21.95                                                                                                              | 17.88                                      | 12.19                                                    | 0.68                                                     | 0.258                                               | 1.467                                                |                |
| 40.17                                                                            | 17.13                  | 35.92           | 37.70                                        | 29.05           | 20.40                                                                                                              | 24.11                                      | 15.73                                                    | 0.65                                                     | 0.349                                               | 1.533                                                |                |
| 50.24                                                                            | 16.95                  | 36.05           | 38.54                                        | 28.71           | 18.87                                                                                                              | 30.51                                      | 19.02                                                    | 0.62                                                     | 0.441                                               | 1.604                                                |                |
| 60.27                                                                            | 16.80                  | 36.14           | 39.25                                        | 28.49           | 17.72                                                                                                              | 37.01                                      | 22.08                                                    | 0.60                                                     | 0.536                                               | 1.676                                                |                |
| 70.34                                                                            | 16.65                  | 36.26           | 39.96                                        | 28.17           | 16.38                                                                                                              | 43.66                                      | 24.95                                                    | 0.57                                                     | 0.633                                               | 1.750                                                |                |
| 80.37                                                                            | 16.52                  | 36.32           | 40.62                                        | 28.13           | 15.65                                                                                                              | 50.40                                      | 27.62                                                    | 0.55                                                     | 0.730                                               | 1.824                                                |                |
| 90.44                                                                            | 16.43                  | 36.42           | 40.95                                        | 27.68           | 14.40                                                                                                              | 57.24                                      | 30.14                                                    | 0.53                                                     | 0.830                                               | 1.899                                                |                |
| 100.47                                                                           | 16.36                  | 36.49           | 41.25                                        | 27.37           | 13.50                                                                                                              | 64.11                                      | 32.48                                                    | 0.51                                                     | 0.932                                               | 1.974                                                |                |
| 110.54                                                                           | 16.30                  | 36.57           | 41.49                                        | 27.03           | 12.57                                                                                                              | 71.05                                      | 34.66                                                    | 0.49                                                     | 1.035                                               | 2.050                                                |                |
| 120.57                                                                           | 16.23                  | 36.63           | 41.75                                        | 26.77           | 11.78                                                                                                              | 78.01                                      | 36.70                                                    | 0.47                                                     | 1.141                                               | 2.126                                                |                |

## H<sub>2</sub>O<sub>2</sub> Synthesis Data Sheet

Entry No. 28 (Exp. Y54) Employed in: Fig 4 Fig 5 Fig 9

| Catalyst, Additives                                                              |                        |                 | Reaction conditions                          |                 | Gas feed rate (sccm)                                                                                               |                                            |                                                          |                                                          |                                                     |                                                      |                |
|----------------------------------------------------------------------------------|------------------------|-----------------|----------------------------------------------|-----------------|--------------------------------------------------------------------------------------------------------------------|--------------------------------------------|----------------------------------------------------------|----------------------------------------------------------|-----------------------------------------------------|------------------------------------------------------|----------------|
| Name                                                                             | Conc.                  | (Unit)          | T <sub>0</sub> (°C)                          | 25.2            |                                                                                                                    | H <sub>2</sub>                             | O <sub>2</sub>                                           | N <sub>2</sub>                                           | Sum                                                 |                                                      |                |
| Pd-PVP                                                                           | 8.33                   | (mg/L)          | T (°C)                                       | 30.1            | Set                                                                                                                | 12.15                                      | 21.80                                                    | 20.00                                                    | 53.95                                               |                                                      |                |
| Pt(NH <sub>3</sub> ) <sub>4</sub> (NO <sub>3</sub> ) <sub>2</sub>                | 0.05                   | (mg-Pt/L)       | P <sub>0</sub> (hPa)                         | 1007.8          | Calibrated                                                                                                         | 12.17                                      | 20.02                                                    | 20.26                                                    | 52.44                                               |                                                      |                |
| H <sub>2</sub> SO <sub>4</sub>                                                   | 0.01                   | (N)             | P (hPa)                                      | 1015.2          | Determination of final [H <sub>2</sub> O <sub>2</sub> ]                                                            | Sample (g)                                 | Absorbance (—)                                           | [H <sub>2</sub> O <sub>2</sub> ] (mmol L <sup>-1</sup> ) |                                                     |                                                      |                |
| NaBr                                                                             | 0.001                  | (N)             | Agitation (rpm)                              | 1198            |                                                                                                                    |                                            |                                                          |                                                          | 0.576                                               | 0.714                                                | 42.49          |
| Comment:<br>Catalyst activation: H <sub>2</sub> gas 20 sccm at 303 K for 40 min. |                        |                 |                                              |                 | Analysis of H <sub>2</sub> O <sub>2</sub> formation selectivity and H <sub>2</sub> O <sub>2</sub> destruction rate |                                            |                                                          | S <sub>f</sub> (—)                                       | 0.7136                                              |                                                      |                |
|                                                                                  |                        |                 |                                              |                 |                                                                                                                    |                                            |                                                          | k <sub>d</sub> [Cat] (h <sup>-1</sup> )                  | 0.4984                                              |                                                      |                |
|                                                                                  |                        |                 |                                              |                 |                                                                                                                    |                                            |                                                          | R <sup>2</sup>                                           | 0.9993                                              |                                                      |                |
| GC calibration                                                                   |                        | GC count        |                                              |                 | Ratio of sensitivity (toward N <sub>2</sub> )                                                                      |                                            | Feed gas measurement                                     |                                                          |                                                     |                                                      |                |
| Timing                                                                           | No.                    | H <sub>2</sub>  | O <sub>2</sub>                               | N <sub>2</sub>  | H <sub>2</sub>                                                                                                     | O <sub>2</sub>                             |                                                          |                                                          |                                                     |                                                      |                |
| Before reaction                                                                  | 1                      | 1106147         | 198082                                       | 162042          | 0.0880                                                                                                             | 0.0880                                     | 0.808                                                    | T <sub>a</sub> (°C)                                      | 25.2                                                |                                                      |                |
|                                                                                  | 2                      | 1106340         | 198193                                       | 162030          | 0.0880                                                                                                             |                                            |                                                          | 0.808                                                    | P <sub>0</sub> (hPa)                                | 1007.0                                               |                |
|                                                                                  | 3                      | 1106662         | 198190                                       | 162082          | 0.0880                                                                                                             |                                            |                                                          | 0.808                                                    | Flow (cc/min)                                       |                                                      |                |
| After reaction                                                                   | 4                      | 1105712         | 198016                                       | 161836          | 0.0879                                                                                                             | 0.0880                                     | 0.808                                                    | H <sub>2</sub>                                           | 13.81                                               |                                                      |                |
|                                                                                  | 5                      | 1104875         | 197942                                       | 161745          | 0.0879                                                                                                             |                                            |                                                          | 0.808                                                    | O <sub>2</sub>                                      | 22.72                                                |                |
|                                                                                  | 6                      | 1105017         | 197830                                       | 161733          | 0.0879                                                                                                             |                                            |                                                          | 0.808                                                    | N <sub>2</sub>                                      | 22.99                                                |                |
| Time                                                                             |                        |                 |                                              | GC count        |                                                                                                                    |                                            | t <sub>correct</sub> (min)                               | Outlet flow (sccm)                                       |                                                     | Conversion(%)                                        |                |
| H                                                                                | M                      | S               | min.                                         | H <sub>2</sub>  | O <sub>2</sub>                                                                                                     | N <sub>2</sub>                             |                                                          | H <sub>2</sub>                                           | O <sub>2</sub>                                      | H <sub>2</sub>                                       | O <sub>2</sub> |
| 18                                                                               | 59                     | 0               | 4.0                                          | 578484          | 119664                                                                                                             | 261714                                     | 0.00                                                     | 7.36                                                     | 15.91                                               | 39.48                                                | 20.54          |
| 19                                                                               | 9                      | 4               | 14.1                                         | 771077          | 180153                                                                                                             | 194249                                     | 10.18                                                    | 7.27                                                     | 15.96                                               | 40.23                                                | 20.28          |
| 19                                                                               | 19                     | 6               | 24.1                                         | 765971          | 185244                                                                                                             | 190298                                     | 20.21                                                    | 7.18                                                     | 16.01                                               | 40.97                                                | 20.03          |
| 19                                                                               | 29                     | 10              | 34.2                                         | 757843          | 186734                                                                                                             | 190353                                     | 30.28                                                    | 7.09                                                     | 16.06                                               | 41.71                                                | 19.80          |
| 19                                                                               | 39                     | 12              | 44.2                                         | 748420          | 187520                                                                                                             | 190390                                     | 40.31                                                    | 7.00                                                     | 16.12                                               | 42.44                                                | 19.48          |
| 19                                                                               | 49                     | 16              | 54.3                                         | 738395          | 187831                                                                                                             | 190272                                     | 50.38                                                    | 6.91                                                     | 16.16                                               | 43.18                                                | 19.29          |
| 19                                                                               | 59                     | 18              | 64.3                                         | 730012          | 188370                                                                                                             | 190546                                     | 60.41                                                    | 6.83                                                     | 16.18                                               | 43.90                                                | 19.18          |
| 20                                                                               | 9                      | 20              | 74.3                                         | 723342          | 189087                                                                                                             | 190937                                     | 70.44                                                    | 6.75                                                     | 16.21                                               | 44.53                                                | 19.04          |
| 20                                                                               | 19                     | 24              | 84.4                                         | 717796          | 189437                                                                                                             | 190984                                     | 80.51                                                    | 6.70                                                     | 16.23                                               | 44.97                                                | 18.91          |
| 20                                                                               | 29                     | 26              | 94.4                                         | 714061          | 189790                                                                                                             | 190918                                     | 90.54                                                    | 6.66                                                     | 16.27                                               | 45.24                                                | 18.73          |
| 20                                                                               | 39                     | 30              | 104.5                                        | 711854          | 190413                                                                                                             | 191493                                     | 100.61                                                   | 6.62                                                     | 16.27                                               | 45.57                                                | 18.71          |
| 20                                                                               | 49                     | 32              | 114.5                                        | 707251          | 190099                                                                                                             | 190369                                     | 110.64                                                   | 6.62                                                     | 16.34                                               | 45.60                                                | 18.36          |
| 20                                                                               | 59                     | 36              | 124.6                                        | 704517          | 190308                                                                                                             | 190244                                     | 120.71                                                   | 6.60                                                     | 16.37                                               | 45.78                                                | 18.22          |
| t <sub>correct</sub> (min)                                                       | Partial pressure (kPa) |                 | Rate (mmol L <sup>-1</sup> h <sup>-1</sup> ) |                 | d[H <sub>2</sub> O <sub>2</sub> ]/dt (mmol L <sup>-1</sup> h <sup>-1</sup> )                                       | Σ[H <sub>2</sub> ] (mmol L <sup>-1</sup> ) | [H <sub>2</sub> O <sub>2</sub> ] (mmol L <sup>-1</sup> ) | S <sub>e</sub> (—)                                       | Σ <sub>2</sub> [H <sub>2</sub> O <sub>2</sub> ] (h) | Σ <sub>1</sub> /[H <sub>2</sub> O <sub>2</sub> ] (—) |                |
|                                                                                  | P <sub>H2</sub>        | P <sub>O2</sub> | r <sub>H2</sub>                              | r <sub>O2</sub> |                                                                                                                    |                                            |                                                          |                                                          |                                                     |                                                      |                |
| 0.00                                                                             | 16.46                  | 35.55           | 42.89                                        | 36.71           | 30.54                                                                                                              | 0.00                                       | 0.00                                                     |                                                          | 0.000                                               | 0.000                                                |                |
| 10.18                                                                            | 16.27                  | 35.70           | 43.71                                        | 36.25           | 28.80                                                                                                              | 7.34                                       | 5.03                                                     | 0.69                                                     | 0.085                                               | 1.459                                                |                |
| 20.21                                                                            | 16.08                  | 35.84           | 44.51                                        | 35.80           | 27.09                                                                                                              | 14.72                                      | 9.70                                                     | 0.66                                                     | 0.171                                               | 1.517                                                |                |
| 30.28                                                                            | 15.90                  | 35.98           | 45.31                                        | 35.39           | 25.46                                                                                                              | 22.25                                      | 14.11                                                    | 0.63                                                     | 0.259                                               | 1.577                                                |                |
| 40.31                                                                            | 15.71                  | 36.15           | 46.11                                        | 34.81           | 23.51                                                                                                              | 29.90                                      | 18.21                                                    | 0.61                                                     | 0.349                                               | 1.642                                                |                |
| 50.38                                                                            | 15.52                  | 36.27           | 46.91                                        | 34.48           | 22.06                                                                                                              | 37.70                                      | 22.03                                                    | 0.58                                                     | 0.442                                               | 1.711                                                |                |
| 60.41                                                                            | 15.35                  | 36.38           | 47.70                                        | 34.28           | 20.86                                                                                                              | 45.61                                      | 25.62                                                    | 0.56                                                     | 0.535                                               | 1.780                                                |                |
| 70.44                                                                            | 15.19                  | 36.48           | 48.38                                        | 34.03           | 19.67                                                                                                              | 53.65                                      | 29.01                                                    | 0.54                                                     | 0.630                                               | 1.849                                                |                |
| 80.51                                                                            | 15.08                  | 36.56           | 48.86                                        | 33.79           | 18.73                                                                                                              | 61.80                                      | 32.23                                                    | 0.52                                                     | 0.727                                               | 1.918                                                |                |
| 90.54                                                                            | 15.01                  | 36.64           | 49.15                                        | 33.47           | 17.80                                                                                                              | 70.00                                      | 35.28                                                    | 0.50                                                     | 0.824                                               | 1.984                                                |                |
| 100.61                                                                           | 14.93                  | 36.68           | 49.51                                        | 33.43           | 17.36                                                                                                              | 78.27                                      | 38.23                                                    | 0.49                                                     | 0.922                                               | 2.047                                                |                |
| 110.64                                                                           | 14.90                  | 36.78           | 49.55                                        | 32.82           | 16.09                                                                                                              | 86.56                                      | 41.03                                                    | 0.47                                                     | 1.020                                               | 2.110                                                |                |
| 120.71                                                                           | 14.85                  | 36.84           | 49.73                                        | 32.56           | 15.39                                                                                                              | 94.88                                      | 43.67                                                    | 0.46                                                     | 1.121                                               | 2.173                                                |                |

## H<sub>2</sub>O<sub>2</sub> Synthesis Data Sheet

Entry No. 29 (Exp. Y44) Employed in: Fig 4 Fig 5 Fig 6 Fig 9

| Catalyst, Additives                                                              |                        |                 | Reaction conditions                          |                 | Gas feed rate (sccm)                                                                                               |                                            |                                                          |                                                          |                                                     |                                                      |                |
|----------------------------------------------------------------------------------|------------------------|-----------------|----------------------------------------------|-----------------|--------------------------------------------------------------------------------------------------------------------|--------------------------------------------|----------------------------------------------------------|----------------------------------------------------------|-----------------------------------------------------|------------------------------------------------------|----------------|
| Name                                                                             | Conc.                  | (Unit)          | T <sub>0</sub> (°C)                          | 25.3            |                                                                                                                    | H <sub>2</sub>                             | O <sub>2</sub>                                           | N <sub>2</sub>                                           | Sum                                                 |                                                      |                |
| Pd-PVP                                                                           | 8.33                   | (mg/L)          | T (°C)                                       | 30.1            | Set                                                                                                                | 13.50                                      | 23.00                                                    | 20.00                                                    | 56.50                                               |                                                      |                |
| Pt(NH <sub>3</sub> ) <sub>4</sub> (NO <sub>3</sub> ) <sub>2</sub>                | 0.0833                 | (mg-Pt/L)       | P <sub>0</sub> (hPa)                         | 1001.8          | Calibrated                                                                                                         | 13.62                                      | 21.16                                                    | 20.37                                                    | 55.15                                               |                                                      |                |
| H <sub>2</sub> SO <sub>4</sub>                                                   | 0.01                   | (N)             | P (hPa)                                      | 1009.2          | Determination of final [H <sub>2</sub> O <sub>2</sub> ]                                                            | Sample (g)                                 | Absorbance (—)                                           | [H <sub>2</sub> O <sub>2</sub> ] (mmol L <sup>-1</sup> ) |                                                     |                                                      |                |
| NaBr                                                                             | 0.001                  | (N)             | Agitation (rpm)                              | 1200            |                                                                                                                    |                                            |                                                          |                                                          | 0.512                                               | 0.789                                                | 52.82          |
| Comment:<br>Catalyst activation: H <sub>2</sub> gas 20 sccm at 303 K for 40 min. |                        |                 |                                              |                 | Analysis of H <sub>2</sub> O <sub>2</sub> formation selectivity and H <sub>2</sub> O <sub>2</sub> destruction rate |                                            |                                                          | S <sub>f</sub> (—)                                       | 0.6468                                              |                                                      |                |
|                                                                                  |                        |                 |                                              |                 |                                                                                                                    |                                            |                                                          | k <sub>d</sub> [Cat] (h <sup>-1</sup> )                  | 0.5017                                              |                                                      |                |
|                                                                                  |                        |                 |                                              |                 |                                                                                                                    |                                            |                                                          | R <sup>2</sup>                                           | 0.9964                                              |                                                      |                |
| GC calibration                                                                   |                        | GC count        |                                              |                 | Ratio of sensitivity (toward N <sub>2</sub> )                                                                      |                                            | Feed gas measurement                                     |                                                          |                                                     |                                                      |                |
| Timing                                                                           | No.                    | H <sub>2</sub>  | O <sub>2</sub>                               | N <sub>2</sub>  | H <sub>2</sub>                                                                                                     | O <sub>2</sub>                             |                                                          |                                                          |                                                     |                                                      |                |
| Before reaction                                                                  | 1                      | 1161740         | 198831                                       | 154690          | 0.0890                                                                                                             | 0.0889                                     | 0.808                                                    | T <sub>a</sub> (°C)                                      | 25.5                                                |                                                      |                |
|                                                                                  | 2                      | 1161752         | 198787                                       | 154589          | 0.0890                                                                                                             |                                            |                                                          | 0.808                                                    | P <sub>0</sub> (hPa)                                | 1002.0                                               |                |
|                                                                                  | 3                      | 1161271         | 198721                                       | 154608          | 0.0890                                                                                                             |                                            |                                                          | 0.808                                                    | Flow (cc/min)                                       |                                                      |                |
| After reaction                                                                   | 4                      | 1161600         | 198398                                       | 154192          | 0.0888                                                                                                             |                                            |                                                          | 0.808                                                    | H <sub>2</sub>                                      | 15.56                                                |                |
|                                                                                  | 5                      | 1161792         | 198496                                       | 154241          | 0.0888                                                                                                             |                                            |                                                          | 0.807                                                    | O <sub>2</sub>                                      | 24.18                                                |                |
|                                                                                  | 6                      | 1161852         | 198501                                       | 154242          | 0.0888                                                                                                             |                                            |                                                          | 0.807                                                    | N <sub>2</sub>                                      | 23.27                                                |                |
| Time                                                                             |                        |                 |                                              | GC count        |                                                                                                                    |                                            | t <sub>correct</sub> (min)                               | Outlet flow (sccm)                                       |                                                     | Conversion(%)                                        |                |
| H                                                                                | M                      | S               | min.                                         | H <sub>2</sub>  | O <sub>2</sub>                                                                                                     | N <sub>2</sub>                             |                                                          | H <sub>2</sub>                                           | O <sub>2</sub>                                      | H <sub>2</sub>                                       | O <sub>2</sub> |
| 15                                                                               | 24                     | 12              | 4.0                                          | 572374          | 120909                                                                                                             | 257597                                     | 0.00                                                     | 7.47                                                     | 16.09                                               | 45.17                                                | 23.98          |
| 15                                                                               | 34                     | 14              | 14.0                                         | 745646          | 179909                                                                                                             | 194275                                     | 10.07                                                    | 7.31                                                     | 16.12                                               | 46.30                                                | 23.83          |
| 15                                                                               | 44                     | 18              | 24.1                                         | 743416          | 185164                                                                                                             | 190051                                     | 20.14                                                    | 7.16                                                     | 16.15                                               | 47.43                                                | 23.68          |
| 15                                                                               | 54                     | 20              | 34.1                                         | 733838          | 186575                                                                                                             | 189774                                     | 30.17                                                    | 7.00                                                     | 16.18                                               | 48.60                                                | 23.56          |
| 16                                                                               | 4                      | 24              | 44.2                                         | 721645          | 187573                                                                                                             | 190145                                     | 40.24                                                    | 6.87                                                     | 16.23                                               | 49.55                                                | 23.30          |
| 16                                                                               | 14                     | 26              | 54.2                                         | 706110          | 188344                                                                                                             | 190820                                     | 50.27                                                    | 6.70                                                     | 16.24                                               | 50.81                                                | 23.26          |
| 16                                                                               | 24                     | 30              | 64.3                                         | 686126          | 188986                                                                                                             | 192145                                     | 60.34                                                    | 6.46                                                     | 16.18                                               | 52.53                                                | 23.53          |
| 16                                                                               | 34                     | 32              | 74.3                                         | 663358          | 189592                                                                                                             | 193859                                     | 70.37                                                    | 6.19                                                     | 16.09                                               | 54.51                                                | 23.96          |
| 16                                                                               | 44                     | 36              | 84.4                                         | 661915          | 190095                                                                                                             | 194281                                     | 80.44                                                    | 6.17                                                     | 16.10                                               | 54.71                                                | 23.93          |
| 16                                                                               | 54                     | 38              | 94.4                                         | 668198          | 189782                                                                                                             | 192152                                     | 90.47                                                    | 6.30                                                     | 16.25                                               | 53.77                                                | 23.21          |
| 17                                                                               | 4                      | 42              | 104.5                                        | 676341          | 190230                                                                                                             | 191352                                     | 100.54                                                   | 6.40                                                     | 16.36                                               | 53.01                                                | 22.71          |
| 17                                                                               | 14                     | 44              | 114.5                                        | 681348          | 191151                                                                                                             | 191108                                     | 110.57                                                   | 6.45                                                     | 16.46                                               | 52.61                                                | 22.23          |
| 17                                                                               | 24                     | 48              | 124.6                                        | 679165          | 191396                                                                                                             | 190934                                     | 120.64                                                   | 6.44                                                     | 16.49                                               | 52.71                                                | 22.06          |
| t <sub>correct</sub> (min)                                                       | Partial pressure (kPa) |                 | Rate (mmol L <sup>-1</sup> h <sup>-1</sup> ) |                 | d[H <sub>2</sub> O <sub>2</sub> ]/dt (mmol L <sup>-1</sup> h <sup>-1</sup> )                                       | Σ[H <sub>2</sub> ] (mmol L <sup>-1</sup> ) | [H <sub>2</sub> O <sub>2</sub> ] (mmol L <sup>-1</sup> ) | S <sub>e</sub> (—)                                       | Σ <sub>2</sub> [H <sub>2</sub> O <sub>2</sub> ] (h) | Σ <sub>1</sub> /[H <sub>2</sub> O <sub>2</sub> ] (—) |                |
|                                                                                  | P <sub>H2</sub>        | P <sub>O2</sub> | r <sub>H2</sub>                              | r <sub>O2</sub> |                                                                                                                    |                                            |                                                          |                                                          |                                                     |                                                      |                |
| 0.00                                                                             | 16.44                  | 35.41           | 54.93                                        | 45.32           | 35.71                                                                                                              | 0.00                                       | 0.00                                                     |                                                          | 0.000                                               | 0.000                                                |                |
| 10.07                                                                            | 16.14                  | 35.58           | 56.30                                        | 45.03           | 33.76                                                                                                              | 9.33                                       | 5.83                                                     | 0.62                                                     | 0.084                                               | 1.601                                                |                |
| 20.14                                                                            | 15.85                  | 35.75           | 57.67                                        | 44.74           | 31.81                                                                                                              | 18.89                                      | 11.33                                                    | 0.60                                                     | 0.170                                               | 1.668                                                |                |
| 30.17                                                                            | 15.54                  | 35.92           | 59.09                                        | 44.52           | 29.95                                                                                                              | 28.66                                      | 16.49                                                    | 0.58                                                     | 0.258                                               | 1.737                                                |                |
| 40.24                                                                            | 15.28                  | 36.10           | 60.25                                        | 44.03           | 27.82                                                                                                              | 38.67                                      | 21.34                                                    | 0.55                                                     | 0.348                                               | 1.812                                                |                |
| 50.27                                                                            | 14.95                  | 36.25           | 61.78                                        | 43.95           | 26.12                                                                                                              | 48.87                                      | 25.85                                                    | 0.53                                                     | 0.440                                               | 1.891                                                |                |
| 60.34                                                                            | 14.53                  | 36.37           | 63.87                                        | 44.46           | 25.05                                                                                                              | 59.41                                      | 30.14                                                    | 0.51                                                     | 0.533                                               | 1.971                                                |                |
| 70.37                                                                            | 14.04                  | 36.47           | 66.28                                        | 45.28           | 24.27                                                                                                              | 70.29                                      | 34.27                                                    | 0.49                                                     | 0.626                                               | 2.051                                                |                |
| 80.44                                                                            | 13.98                  | 36.50           | 66.52                                        | 45.21           | 23.90                                                                                                              | 81.43                                      | 38.31                                                    | 0.47                                                     | 0.719                                               | 2.126                                                |                |
| 90.47                                                                            | 14.18                  | 36.61           | 65.38                                        | 43.86           | 22.33                                                                                                              | 92.46                                      | 42.17                                                    | 0.46                                                     | 0.813                                               | 2.193                                                |                |
| 100.54                                                                           | 14.34                  | 36.67           | 64.46                                        | 42.90           | 21.35                                                                                                              | 103.35                                     | 45.84                                                    | 0.44                                                     | 0.909                                               | 2.255                                                |                |
| 110.57                                                                           | 14.42                  | 36.76           | 63.96                                        | 42.01           | 20.06                                                                                                              | 114.09                                     | 49.30                                                    | 0.43                                                     | 1.006                                               | 2.314                                                |                |
| 120.64                                                                           | 14.38                  | 36.83           | 64.10                                        | 41.69           | 19.28                                                                                                              | 124.83                                     | 52.60                                                    | 0.42                                                     | 1.106                                               | 2.373                                                |                |

## H<sub>2</sub>O<sub>2</sub> Synthesis Data Sheet

Entry No. 30 (Exp. Y49) Employed in: Fig 4 Fig 5 Fig 9

| Catalyst, Additives                                                              |                        |                 | Reaction conditions                          |                 | Gas feed rate (sccm)                                                                                               |                                            |                                                          |                                                          |                                                     |                                                      |                |
|----------------------------------------------------------------------------------|------------------------|-----------------|----------------------------------------------|-----------------|--------------------------------------------------------------------------------------------------------------------|--------------------------------------------|----------------------------------------------------------|----------------------------------------------------------|-----------------------------------------------------|------------------------------------------------------|----------------|
| Name                                                                             | Conc.                  | (Unit)          | T <sub>0</sub> (°C)                          | 25.3            |                                                                                                                    | H <sub>2</sub>                             | O <sub>2</sub>                                           | N <sub>2</sub>                                           | Sum                                                 |                                                      |                |
| Pd-PVP                                                                           | 8.33                   | (mg/L)          | T (°C)                                       | 30.4            | Set                                                                                                                | 14.00                                      | 23.00                                                    | 20.00                                                    | 57.00                                               |                                                      |                |
| Pt(NH <sub>3</sub> ) <sub>4</sub> (NO <sub>3</sub> ) <sub>2</sub>                | 0.125                  | (mg-Pt/L)       | P <sub>0</sub> (hPa)                         | 1001.2          | Calibrated                                                                                                         | 13.97                                      | 21.24                                                    | 20.29                                                    | 55.50                                               |                                                      |                |
| H <sub>2</sub> SO <sub>4</sub>                                                   | 0.01                   | (N)             | P (hPa)                                      | 1008.4          | Determination of final [H <sub>2</sub> O <sub>2</sub> ]                                                            | Sample (g)                                 | Absorbance (—)                                           | [H <sub>2</sub> O <sub>2</sub> ] (mmol L <sup>-1</sup> ) |                                                     |                                                      |                |
| NaBr                                                                             | 0.001                  | (N)             | Agitation (rpm)                              | 1198            |                                                                                                                    |                                            |                                                          |                                                          | 0.666                                               | 1.014                                                | 52.29          |
| Comment:<br>Catalyst activation: H <sub>2</sub> gas 20 sccm at 303 K for 40 min. |                        |                 |                                              |                 | Analysis of H <sub>2</sub> O <sub>2</sub> formation selectivity and H <sub>2</sub> O <sub>2</sub> destruction rate |                                            |                                                          | S <sub>f</sub> (—)                                       | 0.4773                                              |                                                      |                |
|                                                                                  |                        |                 |                                              |                 |                                                                                                                    |                                            |                                                          | k <sub>d</sub> [Cat] (h <sup>-1</sup> )                  | 0.1897                                              |                                                      |                |
|                                                                                  |                        |                 |                                              |                 |                                                                                                                    |                                            |                                                          | R <sup>2</sup>                                           | 1.0000                                              |                                                      |                |
| GC calibration                                                                   |                        | GC count        |                                              |                 | Ratio of sensitivity (toward N <sub>2</sub> )                                                                      |                                            | Feed gas measurement                                     |                                                          |                                                     |                                                      |                |
| Timing                                                                           | No.                    | H <sub>2</sub>  | O <sub>2</sub>                               | N <sub>2</sub>  | H <sub>2</sub>                                                                                                     | O <sub>2</sub>                             |                                                          |                                                          |                                                     |                                                      |                |
| Before reaction                                                                  | 1                      | 1200677         | 198450                                       | 153700          | 0.0882                                                                                                             | 0.0881                                     | 0.811                                                    | T <sub>a</sub> (°C)                                      | 25.0                                                |                                                      |                |
|                                                                                  | 2                      | 1200414         | 198419                                       | 153752          | 0.0882                                                                                                             |                                            |                                                          | 0.811                                                    | P <sub>0</sub> (hPa)                                | 1000.2                                               |                |
|                                                                                  | 3                      | 1200608         | 198358                                       | 153631          | 0.0881                                                                                                             |                                            |                                                          | 0.811                                                    | Flow (cc/min)                                       |                                                      |                |
| After reaction                                                                   | 4                      | 1195314         | 197298                                       | 152710          | 0.0880                                                                                                             |                                            |                                                          | 0.810                                                    | H <sub>2</sub>                                      | 15.95                                                |                |
|                                                                                  | 5                      | 1194923         | 197334                                       | 152725          | 0.0880                                                                                                             |                                            |                                                          | 0.810                                                    | O <sub>2</sub>                                      | 24.25                                                |                |
|                                                                                  | 6                      | 1194077         | 197393                                       | 152789          | 0.0881                                                                                                             |                                            |                                                          | 0.810                                                    | N <sub>2</sub>                                      | 23.16                                                |                |
| Time                                                                             |                        |                 |                                              | GC count        |                                                                                                                    |                                            | t <sub>correct</sub> (min)                               | Outlet flow (sccm)                                       |                                                     | Conversion(%)                                        |                |
| H                                                                                | M                      | S               | min.                                         | H <sub>2</sub>  | O <sub>2</sub>                                                                                                     | N <sub>2</sub>                             |                                                          | H <sub>2</sub>                                           | O <sub>2</sub>                                      | H <sub>2</sub>                                       | O <sub>2</sub> |
| 18                                                                               | 25                     | 14              | 4.0                                          | 571033          | 120471                                                                                                             | 260624                                     | 0.00                                                     | 6.11                                                     | 15.44                                               | 56.28                                                | 27.33          |
| 18                                                                               | 35                     | 16              | 14.0                                         | 678618          | 180524                                                                                                             | 201727                                     | 10.97                                                    | 6.10                                                     | 15.49                                               | 56.36                                                | 27.08          |
| 18                                                                               | 45                     | 20              | 24.1                                         | 673546          | 185883                                                                                                             | 197689                                     | 21.03                                                    | 6.09                                                     | 15.54                                               | 56.43                                                | 26.86          |
| 18                                                                               | 55                     | 22              | 34.1                                         | 670361          | 186693                                                                                                             | 197022                                     | 31.07                                                    | 6.08                                                     | 15.58                                               | 56.47                                                | 26.63          |
| 19                                                                               | 5                      | 26              | 44.2                                         | 665898          | 186659                                                                                                             | 196417                                     | 41.13                                                    | 6.06                                                     | 15.63                                               | 56.63                                                | 26.42          |
| 19                                                                               | 15                     | 28              | 54.2                                         | 664541          | 186832                                                                                                             | 195965                                     | 51.17                                                    | 6.06                                                     | 15.68                                               | 56.62                                                | 26.18          |
| 19                                                                               | 25                     | 32              | 64.3                                         | 663745          | 186999                                                                                                             | 195413                                     | 61.23                                                    | 6.07                                                     | 15.74                                               | 56.55                                                | 25.90          |
| 19                                                                               | 35                     | 34              | 74.3                                         | 663756          | 187268                                                                                                             | 194974                                     | 71.27                                                    | 6.08                                                     | 15.80                                               | 56.45                                                | 25.63          |
| 19                                                                               | 45                     | 38              | 84.4                                         | 663951          | 187524                                                                                                             | 194588                                     | 81.33                                                    | 6.10                                                     | 15.85                                               | 56.35                                                | 25.38          |
| 19                                                                               | 55                     | 40              | 94.4                                         | 666901          | 188252                                                                                                             | 194420                                     | 91.37                                                    | 6.13                                                     | 15.93                                               | 56.12                                                | 25.03          |
| 20                                                                               | 5                      | 44              | 104.5                                        | 667033          | 188525                                                                                                             | 194115                                     | 101.43                                                   | 6.14                                                     | 15.97                                               | 56.04                                                | 24.80          |
| 20                                                                               | 15                     | 46              | 114.5                                        | 669002          | 188854                                                                                                             | 193694                                     | 111.47                                                   | 6.17                                                     | 16.04                                               | 55.81                                                | 24.50          |
| 20                                                                               | 25                     | 48              | 124.6                                        | 670610          | 189242                                                                                                             | 193359                                     | 121.50                                                   | 6.20                                                     | 16.10                                               | 55.63                                                | 24.22          |
| t <sub>correct</sub> (min)                                                       | Partial pressure (kPa) |                 | Rate (mmol L <sup>-1</sup> h <sup>-1</sup> ) |                 | d[H <sub>2</sub> O <sub>2</sub> ]/dt (mmol L <sup>-1</sup> h <sup>-1</sup> )                                       | Σ[H <sub>2</sub> ] (mmol L <sup>-1</sup> ) | [H <sub>2</sub> O <sub>2</sub> ] (mmol L <sup>-1</sup> ) | S <sub>e</sub> (—)                                       | Σ <sub>2</sub> [H <sub>2</sub> O <sub>2</sub> ] (h) | Σ <sub>1</sub> /[H <sub>2</sub> O <sub>2</sub> ] (—) |                |
|                                                                                  | P <sub>H2</sub>        | P <sub>O2</sub> | r <sub>H2</sub>                              | r <sub>O2</sub> |                                                                                                                    |                                            |                                                          |                                                          |                                                     |                                                      |                |
| 0.00                                                                             | 14.10                  | 35.64           | 70.20                                        | 51.82           | 33.45                                                                                                              | 0.00                                       | 0.00                                                     |                                                          | 0.000                                               | 0.000                                                |                |
| 10.97                                                                            | 14.07                  | 35.73           | 70.30                                        | 51.36           | 32.42                                                                                                              | 12.84                                      | 6.02                                                     | 0.47                                                     | 0.091                                               | 2.133                                                |                |
| 21.03                                                                            | 14.03                  | 35.81           | 70.39                                        | 50.93           | 31.48                                                                                                              | 24.64                                      | 11.38                                                    | 0.46                                                     | 0.177                                               | 2.165                                                |                |
| 31.07                                                                            | 14.00                  | 35.88           | 70.44                                        | 50.50           | 30.56                                                                                                              | 36.42                                      | 16.57                                                    | 0.45                                                     | 0.262                                               | 2.198                                                |                |
| 41.13                                                                            | 13.94                  | 35.97           | 70.64                                        | 50.10           | 29.56                                                                                                              | 48.25                                      | 21.61                                                    | 0.45                                                     | 0.349                                               | 2.233                                                |                |
| 51.17                                                                            | 13.93                  | 36.04           | 70.62                                        | 49.65           | 28.67                                                                                                              | 60.06                                      | 26.48                                                    | 0.44                                                     | 0.437                                               | 2.268                                                |                |
| 61.23                                                                            | 13.93                  | 36.11           | 70.54                                        | 49.12           | 27.71                                                                                                              | 71.90                                      | 31.21                                                    | 0.43                                                     | 0.526                                               | 2.304                                                |                |
| 71.27                                                                            | 13.94                  | 36.19           | 70.41                                        | 48.61           | 26.80                                                                                                              | 83.69                                      | 35.76                                                    | 0.43                                                     | 0.615                                               | 2.340                                                |                |
| 81.33                                                                            | 13.95                  | 36.25           | 70.29                                        | 48.13           | 25.98                                                                                                              | 95.49                                      | 40.19                                                    | 0.42                                                     | 0.706                                               | 2.376                                                |                |
| 91.37                                                                            | 13.99                  | 36.33           | 70.00                                        | 47.46           | 24.92                                                                                                              | 107.22                                     | 44.45                                                    | 0.41                                                     | 0.798                                               | 2.412                                                |                |
| 101.43                                                                           | 13.99                  | 36.39           | 69.90                                        | 47.03           | 24.16                                                                                                              | 118.96                                     | 48.56                                                    | 0.41                                                     | 0.891                                               | 2.450                                                |                |
| 111.47                                                                           | 14.03                  | 36.45           | 69.62                                        | 46.47           | 23.32                                                                                                              | 130.62                                     | 52.53                                                    | 0.40                                                     | 0.984                                               | 2.486                                                |                |
| 121.50                                                                           | 14.06                  | 36.52           | 69.39                                        | 45.93           | 22.46                                                                                                              | 142.25                                     | 56.36                                                    | 0.40                                                     | 1.079                                               | 2.524                                                |                |

## H<sub>2</sub>O<sub>2</sub> Synthesis Data Sheet

Entry No. 31 (Exp. Y53) Employed in: Fig 4 Fig 5 Fig 9

| Catalyst, Additives                                                              |                        |                 | Reaction conditions                          |                 | Gas feed rate (sccm)                                                                                               |                                            |                                                          |                                                          |                                                     |                                                      |                |
|----------------------------------------------------------------------------------|------------------------|-----------------|----------------------------------------------|-----------------|--------------------------------------------------------------------------------------------------------------------|--------------------------------------------|----------------------------------------------------------|----------------------------------------------------------|-----------------------------------------------------|------------------------------------------------------|----------------|
| Name                                                                             | Conc.                  | (Unit)          | T <sub>0</sub> (°C)                          | 25.6            |                                                                                                                    | H <sub>2</sub>                             | O <sub>2</sub>                                           | N <sub>2</sub>                                           | Sum                                                 |                                                      |                |
| Pd-PVP                                                                           | 8.33                   | (mg/L)          | T (°C)                                       | 30.2            | Set                                                                                                                | 15.50                                      | 24.50                                                    | 20.00                                                    | 60.00                                               |                                                      |                |
| Pt(NH <sub>3</sub> ) <sub>4</sub> (NO <sub>3</sub> ) <sub>2</sub>                | 0.125                  | (mg-Pt/L)       | P <sub>0</sub> (hPa)                         | 1006.8          | Calibrated                                                                                                         | 15.61                                      | 22.63                                                    | 20.27                                                    | 58.50                                               |                                                      |                |
| H <sub>2</sub> SO <sub>4</sub>                                                   | 0.01                   | (N)             | P (hPa)                                      | 1014.5          | Determination of final [H <sub>2</sub> O <sub>2</sub> ]                                                            | Sample (g)                                 | Absorbance (—)                                           | [H <sub>2</sub> O <sub>2</sub> ] (mmol L <sup>-1</sup> ) |                                                     |                                                      |                |
| NaBr                                                                             | 0.001                  | (N)             | Agitation (rpm)                              | 1201            |                                                                                                                    |                                            |                                                          |                                                          | 0.459                                               | 0.774                                                | 57.79          |
| Comment:<br>Catalyst activation: H <sub>2</sub> gas 20 sccm at 303 K for 40 min. |                        |                 |                                              |                 | Analysis of H <sub>2</sub> O <sub>2</sub> formation selectivity and H <sub>2</sub> O <sub>2</sub> destruction rate |                                            |                                                          | S <sub>f</sub> (—)                                       | 0.6120                                              |                                                      |                |
|                                                                                  |                        |                 |                                              |                 |                                                                                                                    |                                            |                                                          | k <sub>d</sub> [Cat] (h <sup>-1</sup> )                  | 0.5093                                              |                                                      |                |
|                                                                                  |                        |                 |                                              |                 |                                                                                                                    |                                            |                                                          | R <sup>2</sup>                                           | 0.9891                                              |                                                      |                |
| GC calibration                                                                   |                        | GC count        |                                              |                 | Ratio of sensitivity (toward N <sub>2</sub> )                                                                      |                                            | Feed gas measurement                                     |                                                          |                                                     |                                                      |                |
| Timing                                                                           | No.                    | H <sub>2</sub>  | O <sub>2</sub>                               | N <sub>2</sub>  | H <sub>2</sub>                                                                                                     | O <sub>2</sub>                             |                                                          |                                                          |                                                     |                                                      |                |
| Before reaction                                                                  | 1                      | 1252567         | 200979                                       | 146253          | 0.0899                                                                                                             | 0.0898                                     | 0.813                                                    | T <sub>a</sub> (°C)                                      | 25.5                                                |                                                      |                |
|                                                                                  | 2                      | 1252841         | 200777                                       | 146158          | 0.0898                                                                                                             |                                            |                                                          | 0.813                                                    | P <sub>0</sub> (hPa)                                | 1006.6                                               |                |
|                                                                                  | 3                      | 1252302         | 200738                                       | 146067          | 0.0898                                                                                                             |                                            |                                                          | 0.812                                                    | Flow (cc/min)                                       |                                                      |                |
| After reaction                                                                   | 4                      | 1252071         | 200577                                       | 145967          | 0.0898                                                                                                             |                                            |                                                          | 0.812                                                    | H <sub>2</sub>                                      | 17.75                                                |                |
|                                                                                  | 5                      | 1251961         | 200671                                       | 146212          | 0.0899                                                                                                             |                                            |                                                          | 0.813                                                    | O <sub>2</sub>                                      | 25.73                                                |                |
|                                                                                  | 6                      | 1253935         | 200915                                       | 146206          | 0.0898                                                                                                             |                                            |                                                          | 0.812                                                    | N <sub>2</sub>                                      | 23.05                                                |                |
| Time                                                                             |                        |                 |                                              | GC count        |                                                                                                                    |                                            | t <sub>correct</sub> (min)                               | Outlet flow (sccm)                                       |                                                     | Conversion(%)                                        |                |
| H                                                                                | M                      | S               | min.                                         | H <sub>2</sub>  | O <sub>2</sub>                                                                                                     | N <sub>2</sub>                             |                                                          | H <sub>2</sub>                                           | O <sub>2</sub>                                      | H <sub>2</sub>                                       | O <sub>2</sub> |
| 14                                                                               | 53                     | 28              | 4.0                                          | 624891          | 124674                                                                                                             | 251722                                     | 0.00                                                     | 8.59                                                     | 16.91                                               | 44.97                                                | 25.25          |
| 15                                                                               | 3                      | 30              | 14.0                                         | 796545          | 182321                                                                                                             | 189011                                     | 9.91                                                     | 8.29                                                     | 16.88                                               | 46.88                                                | 25.42          |
| 15                                                                               | 13                     | 34              | 24.1                                         | 793019          | 187345                                                                                                             | 185236                                     | 19.98                                                    | 7.99                                                     | 16.84                                               | 48.79                                                | 25.58          |
| 15                                                                               | 23                     | 36              | 34.1                                         | 780148          | 188747                                                                                                             | 185154                                     | 30.01                                                    | 7.67                                                     | 16.79                                               | 50.84                                                | 25.80          |
| 15                                                                               | 33                     | 40              | 44.2                                         | 763958          | 190015                                                                                                             | 186390                                     | 40.08                                                    | 7.46                                                     | 16.79                                               | 52.18                                                | 25.79          |
| 15                                                                               | 43                     | 42              | 54.2                                         | 732179          | 190616                                                                                                             | 187791                                     | 50.11                                                    | 7.10                                                     | 16.72                                               | 54.51                                                | 26.12          |
| 15                                                                               | 53                     | 46              | 64.3                                         | 707549          | 191041                                                                                                             | 189227                                     | 60.18                                                    | 6.81                                                     | 16.63                                               | 56.37                                                | 26.51          |
| 16                                                                               | 3                      | 48              | 74.3                                         | 714871          | 191642                                                                                                             | 188525                                     | 70.21                                                    | 6.91                                                     | 16.74                                               | 55.76                                                | 26.01          |
| 16                                                                               | 13                     | 52              | 84.4                                         | 727001          | 191997                                                                                                             | 187070                                     | 80.28                                                    | 7.08                                                     | 16.90                                               | 54.66                                                | 25.29          |
| 16                                                                               | 23                     | 54              | 94.4                                         | 743721          | 192422                                                                                                             | 185160                                     | 90.31                                                    | 7.31                                                     | 17.12                                               | 53.14                                                | 24.36          |
| 16                                                                               | 33                     | 56              | 104.5                                        | 753886          | 192975                                                                                                             | 183963                                     | 100.35                                                   | 7.46                                                     | 17.28                                               | 52.19                                                | 23.64          |
| 16                                                                               | 44                     | 0               | 114.5                                        | 752626          | 193379                                                                                                             | 183816                                     | 110.41                                                   | 7.46                                                     | 17.33                                               | 52.23                                                | 23.42          |
| 16                                                                               | 54                     | 2               | 124.6                                        | 747189          | 193767                                                                                                             | 184197                                     | 120.45                                                   | 7.39                                                     | 17.33                                               | 52.67                                                | 23.43          |
| t <sub>correct</sub> (min)                                                       | Partial pressure (kPa) |                 | Rate (mmol L <sup>-1</sup> h <sup>-1</sup> ) |                 | d[H <sub>2</sub> O <sub>2</sub> ]/dt (mmol L <sup>-1</sup> h <sup>-1</sup> )                                       | Σ[H <sub>2</sub> ] (mmol L <sup>-1</sup> ) | [H <sub>2</sub> O <sub>2</sub> ] (mmol L <sup>-1</sup> ) | S <sub>e</sub> (—)                                       | Σ <sub>2</sub> [H <sub>2</sub> O <sub>2</sub> ] (h) | Σ <sub>1</sub> /[H <sub>2</sub> O <sub>2</sub> ] (—) |                |
|                                                                                  | P <sub>H2</sub>        | P <sub>O2</sub> | r <sub>H2</sub>                              | r <sub>O2</sub> |                                                                                                                    |                                            |                                                          |                                                          |                                                     |                                                      |                |
| 0.00                                                                             | 18.24                  | 35.92           | 62.68                                        | 51.01           | 39.34                                                                                                              | 0.00                                       | 0.00                                                     |                                                          | 0.000                                               | 0.000                                                |                |
| 9.91                                                                             | 17.74                  | 36.11           | 65.34                                        | 51.34           | 37.35                                                                                                              | 10.58                                      | 6.34                                                     | 0.60                                                     | 0.083                                               | 1.669                                                |                |
| 19.98                                                                            | 17.23                  | 36.29           | 68.00                                        | 51.68           | 35.36                                                                                                              | 21.76                                      | 12.44                                                    | 0.57                                                     | 0.169                                               | 1.750                                                |                |
| 30.01                                                                            | 16.67                  | 36.48           | 70.85                                        | 52.12           | 33.38                                                                                                              | 33.37                                      | 18.18                                                    | 0.54                                                     | 0.256                                               | 1.835                                                |                |
| 40.08                                                                            | 16.29                  | 36.65           | 72.72                                        | 52.11           | 31.50                                                                                                              | 45.42                                      | 23.63                                                    | 0.52                                                     | 0.346                                               | 1.922                                                |                |
| 50.11                                                                            | 15.65                  | 36.85           | 75.97                                        | 52.76           | 29.55                                                                                                              | 57.85                                      | 28.73                                                    | 0.50                                                     | 0.437                                               | 2.013                                                |                |
| 60.18                                                                            | 15.14                  | 36.97           | 78.57                                        | 53.56           | 28.56                                                                                                              | 70.81                                      | 33.60                                                    | 0.47                                                     | 0.529                                               | 2.107                                                |                |
| 70.21                                                                            | 15.28                  | 37.05           | 77.71                                        | 52.54           | 27.37                                                                                                              | 83.88                                      | 38.28                                                    | 0.46                                                     | 0.621                                               | 2.191                                                |                |
| 80.28                                                                            | 15.54                  | 37.13           | 76.17                                        | 51.10           | 26.02                                                                                                              | 96.79                                      | 42.76                                                    | 0.44                                                     | 0.715                                               | 2.264                                                |                |
| 90.31                                                                            | 15.91                  | 37.22           | 74.05                                        | 49.20           | 24.35                                                                                                              | 109.35                                     | 46.97                                                    | 0.43                                                     | 0.811                                               | 2.328                                                |                |
| 100.35                                                                           | 16.12                  | 37.31           | 72.73                                        | 47.77           | 22.80                                                                                                              | 121.62                                     | 50.91                                                    | 0.42                                                     | 0.909                                               | 2.389                                                |                |
| 110.41                                                                           | 16.09                  | 37.38           | 72.79                                        | 47.32           | 21.85                                                                                                              | 133.83                                     | 54.66                                                    | 0.41                                                     | 1.009                                               | 2.448                                                |                |
| 120.45                                                                           | 15.96                  | 37.44           | 73.41                                        | 47.33           | 21.25                                                                                                              | 146.05                                     | 58.26                                                    | 0.40                                                     | 1.108                                               | 2.507                                                |                |



## H<sub>2</sub>O<sub>2</sub> Synthesis Data Sheet

Entry No. 32 (Exp. Y45) Employed in: Fig 4 Fig 5 Fig 9

| Catalyst, Additives                                                              |                        |                 | Reaction conditions                          |                 | Gas feed rate (sccm)                                                                                               |                                            |                                                          |                                                          |                                                     |                                                      |                |
|----------------------------------------------------------------------------------|------------------------|-----------------|----------------------------------------------|-----------------|--------------------------------------------------------------------------------------------------------------------|--------------------------------------------|----------------------------------------------------------|----------------------------------------------------------|-----------------------------------------------------|------------------------------------------------------|----------------|
| Name                                                                             | Conc.                  | (Unit)          | T <sub>0</sub> (°C)                          | 25.7            |                                                                                                                    | H <sub>2</sub>                             | O <sub>2</sub>                                           | N <sub>2</sub>                                           | Sum                                                 |                                                      |                |
| Pd-PVP                                                                           | 8.33                   | (mg/L)          | T (°C)                                       | 30.4            | Set                                                                                                                | 14.30                                      | 22.70                                                    | 20.00                                                    | 57.00                                               |                                                      |                |
| Pt(NH <sub>3</sub> ) <sub>4</sub> (NO <sub>3</sub> ) <sub>2</sub>                | 0.1667                 | (mg-Pt/L)       | P <sub>0</sub> (hPa)                         | 1002.8          | Calibrated                                                                                                         | 14.33                                      | 20.89                                                    | 20.22                                                    | 55.44                                               |                                                      |                |
| H <sub>2</sub> SO <sub>4</sub>                                                   | 0.01                   | (N)             | P (hPa)                                      | 1009.9          | Determination of final [H <sub>2</sub> O <sub>2</sub> ]                                                            | Sample (g)                                 | Absorbance (—)                                           | [H <sub>2</sub> O <sub>2</sub> ] (mmol L <sup>-1</sup> ) |                                                     |                                                      |                |
| NaBr                                                                             | 0.001                  | (N)             | Agitation (rpm)                              | 1200            |                                                                                                                    |                                            |                                                          |                                                          |                                                     | 0.566                                                | 0.926          |
| Comment:<br>Catalyst activation: H <sub>2</sub> gas 20 sccm at 303 K for 40 min. |                        |                 |                                              |                 | Analysis of H <sub>2</sub> O <sub>2</sub> formation selectivity and H <sub>2</sub> O <sub>2</sub> destruction rate |                                            |                                                          | S <sub>f</sub> (—)                                       | 0.4376                                              |                                                      |                |
|                                                                                  |                        |                 |                                              |                 |                                                                                                                    |                                            |                                                          | k <sub>d</sub> [Cat] (h <sup>-1</sup> )                  | 0.1461                                              |                                                      |                |
|                                                                                  |                        |                 |                                              |                 |                                                                                                                    |                                            |                                                          | R <sup>2</sup>                                           | 0.9998                                              |                                                      |                |
| GC calibration                                                                   |                        | GC count        |                                              |                 | Ratio of sensitivity (toward N <sub>2</sub> )                                                                      |                                            | Feed gas measurement                                     |                                                          |                                                     |                                                      |                |
| Timing                                                                           | No.                    | H <sub>2</sub>  | O <sub>2</sub>                               | N <sub>2</sub>  | H <sub>2</sub>                                                                                                     | O <sub>2</sub>                             |                                                          |                                                          |                                                     |                                                      |                |
| Before reaction                                                                  | 1                      | 1217558         | 194720                                       | 153168          | 0.0891                                                                                                             | 0.812                                      | 0.812                                                    | T <sub>a</sub> (°C)                                      | 25.5                                                |                                                      |                |
|                                                                                  | 2                      | 1218073         | 194765                                       | 153217          | 0.0891                                                                                                             | 0.813                                      |                                                          | P <sub>0</sub> (hPa)                                     | 1002.2                                              |                                                      |                |
|                                                                                  | 3                      | 1218007         | 194719                                       | 153218          | 0.0891                                                                                                             | 0.813                                      |                                                          | Flow (cc/min)                                            |                                                     |                                                      |                |
| After reaction                                                                   | 4                      | 1219218         | 195050                                       | 153281          | 0.0891                                                                                                             | 0.812                                      | H <sub>2</sub>                                           | 16.37                                                    |                                                     |                                                      |                |
|                                                                                  | 5                      | 1218415         | 194811                                       | 153009          | 0.0890                                                                                                             | 0.811                                      | O <sub>2</sub>                                           | 23.86                                                    |                                                     |                                                      |                |
|                                                                                  | 6                      | 1218069         | 194729                                       | 152989          | 0.0890                                                                                                             | 0.811                                      | N <sub>2</sub>                                           | 23.10                                                    |                                                     |                                                      |                |
| Time                                                                             |                        |                 |                                              | GC count        |                                                                                                                    |                                            | t <sub>correct</sub> (min)                               | Outlet flow (sccm)                                       |                                                     | Conversion(%)                                        |                |
| H                                                                                | M                      | S               | min.                                         | H <sub>2</sub>  | O <sub>2</sub>                                                                                                     | N <sub>2</sub>                             |                                                          | H <sub>2</sub>                                           | O <sub>2</sub>                                      | H <sub>2</sub>                                       | O <sub>2</sub> |
| 19                                                                               | 49                     | 18              | 4.0                                          | 573679          | 117108                                                                                                             | 261580                                     | 0.00                                                     | 5.99                                                     | 14.89                                               | 58.21                                                | 28.69          |
| 19                                                                               | 59                     | 22              | 14.1                                         | 663483          | 176758                                                                                                             | 204789                                     | 11.06                                                    | 6.00                                                     | 14.95                                               | 58.15                                                | 28.44          |
| 20                                                                               | 9                      | 24              | 24.1                                         | 664992          | 182326                                                                                                             | 200986                                     | 21.09                                                    | 6.01                                                     | 14.99                                               | 58.09                                                | 28.22          |
| 20                                                                               | 19                     | 28              | 34.2                                         | 665309          | 182563                                                                                                             | 199347                                     | 31.16                                                    | 6.01                                                     | 15.04                                               | 58.04                                                | 28.00          |
| 20                                                                               | 29                     | 30              | 44.2                                         | 665005          | 182803                                                                                                             | 198932                                     | 41.19                                                    | 6.02                                                     | 15.09                                               | 57.98                                                | 27.76          |
| 20                                                                               | 39                     | 32              | 54.2                                         | 665246          | 183210                                                                                                             | 198807                                     | 51.23                                                    | 6.03                                                     | 15.13                                               | 57.93                                                | 27.55          |
| 20                                                                               | 49                     | 36              | 64.3                                         | 666031          | 183408                                                                                                             | 198342                                     | 61.29                                                    | 6.05                                                     | 15.18                                               | 57.79                                                | 27.30          |
| 20                                                                               | 59                     | 38              | 74.3                                         | 666803          | 183710                                                                                                             | 198041                                     | 71.33                                                    | 6.07                                                     | 15.23                                               | 57.67                                                | 27.07          |
| 21                                                                               | 9                      | 42              | 84.4                                         | 667120          | 184078                                                                                                             | 197886                                     | 81.39                                                    | 6.07                                                     | 15.27                                               | 57.62                                                | 26.87          |
| 21                                                                               | 19                     | 44              | 94.4                                         | 668521          | 184444                                                                                                             | 197485                                     | 91.43                                                    | 6.10                                                     | 15.34                                               | 57.44                                                | 26.57          |
| 21                                                                               | 29                     | 48              | 104.5                                        | 669206          | 184668                                                                                                             | 197066                                     | 101.49                                                   | 6.12                                                     | 15.39                                               | 57.31                                                | 26.33          |
| 21                                                                               | 39                     | 50              | 114.5                                        | 670276          | 185055                                                                                                             | 196715                                     | 111.53                                                   | 6.14                                                     | 15.45                                               | 57.17                                                | 26.04          |
| 21                                                                               | 49                     | 54              | 124.6                                        | 671378          | 185551                                                                                                             | 196967                                     | 121.59                                                   | 6.14                                                     | 15.47                                               | 57.15                                                | 25.94          |
| t <sub>correct</sub> (min)                                                       | Partial pressure (kPa) |                 | Rate (mmol L <sup>-1</sup> h <sup>-1</sup> ) |                 | d[H <sub>2</sub> O <sub>2</sub> ]/dt (mmol L <sup>-1</sup> h <sup>-1</sup> )                                       | Σ[H <sub>2</sub> ] (mmol L <sup>-1</sup> ) | [H <sub>2</sub> O <sub>2</sub> ] (mmol L <sup>-1</sup> ) | S <sub>e</sub> (—)                                       | Σ <sub>2</sub> [H <sub>2</sub> O <sub>2</sub> ] (h) | Σ <sub>1</sub> /[H <sub>2</sub> O <sub>2</sub> ] (—) |                |
|                                                                                  | P <sub>H2</sub>        | P <sub>O2</sub> | r <sub>H2</sub>                              | r <sub>O2</sub> |                                                                                                                    |                                            |                                                          |                                                          |                                                     |                                                      |                |
| 0.00                                                                             | 14.09                  | 35.05           | 74.48                                        | 53.51           | 32.53                                                                                                              | 0.00                                       | 0.00                                                     |                                                          | 0.000                                               | 0.000                                                |                |
| 11.06                                                                            | 14.09                  | 35.12           | 74.40                                        | 53.05           | 31.69                                                                                                              | 13.72                                      | 5.92                                                     | 0.43                                                     | 0.092                                               | 2.318                                                |                |
| 21.09                                                                            | 14.09                  | 35.18           | 74.33                                        | 52.63           | 30.93                                                                                                              | 26.16                                      | 11.16                                                    | 0.43                                                     | 0.177                                               | 2.345                                                |                |
| 31.16                                                                            | 14.09                  | 35.25           | 74.27                                        | 52.22           | 30.17                                                                                                              | 38.62                                      | 16.28                                                    | 0.42                                                     | 0.263                                               | 2.372                                                |                |
| 41.19                                                                            | 14.09                  | 35.32           | 74.18                                        | 51.76           | 29.35                                                                                                              | 51.04                                      | 21.26                                                    | 0.42                                                     | 0.349                                               | 2.401                                                |                |
| 51.23                                                                            | 14.09                  | 35.37           | 74.13                                        | 51.38           | 28.63                                                                                                              | 63.44                                      | 26.11                                                    | 0.41                                                     | 0.436                                               | 2.430                                                |                |
| 61.29                                                                            | 14.12                  | 35.43           | 73.94                                        | 50.91           | 27.89                                                                                                              | 75.86                                      | 30.85                                                    | 0.41                                                     | 0.524                                               | 2.459                                                |                |
| 71.33                                                                            | 14.13                  | 35.49           | 73.79                                        | 50.48           | 27.18                                                                                                              | 88.21                                      | 35.45                                                    | 0.40                                                     | 0.612                                               | 2.488                                                |                |
| 81.39                                                                            | 14.13                  | 35.55           | 73.72                                        | 50.11           | 26.49                                                                                                              | 100.58                                     | 39.95                                                    | 0.40                                                     | 0.701                                               | 2.517                                                |                |
| 91.43                                                                            | 14.16                  | 35.62           | 73.50                                        | 49.56           | 25.62                                                                                                              | 112.89                                     | 44.31                                                    | 0.39                                                     | 0.791                                               | 2.548                                                |                |
| 101.49                                                                           | 14.18                  | 35.68           | 73.33                                        | 49.10           | 24.87                                                                                                              | 125.21                                     | 48.55                                                    | 0.39                                                     | 0.883                                               | 2.579                                                |                |
| 111.53                                                                           | 14.20                  | 35.75           | 73.14                                        | 48.57           | 23.99                                                                                                              | 137.46                                     | 52.63                                                    | 0.38                                                     | 0.975                                               | 2.612                                                |                |
| 121.59                                                                           | 14.20                  | 35.78           | 73.12                                        | 48.37           | 23.62                                                                                                              | 149.73                                     | 56.63                                                    | 0.38                                                     | 1.068                                               | 2.644                                                |                |

## H<sub>2</sub>O<sub>2</sub> Synthesis Data Sheet

Entry No. 33 (Exp. Y50) Employed in: Fig 4 Fig 5 Fig 9

| Catalyst, Additives                                                              |                        |                 | Reaction conditions                          |                 | Gas feed rate (sccm)                                                                                               |                                            |                                                          |                                                          |                                                     |                                                      |                |                |       |
|----------------------------------------------------------------------------------|------------------------|-----------------|----------------------------------------------|-----------------|--------------------------------------------------------------------------------------------------------------------|--------------------------------------------|----------------------------------------------------------|----------------------------------------------------------|-----------------------------------------------------|------------------------------------------------------|----------------|----------------|-------|
| Name                                                                             | Conc.                  | (Unit)          | T <sub>0</sub> (°C)                          | 25.4            |                                                                                                                    | H <sub>2</sub>                             | O <sub>2</sub>                                           | N <sub>2</sub>                                           | Sum                                                 |                                                      |                |                |       |
| Pd-PVP                                                                           | 8.33                   | (mg/L)          | T (°C)                                       | 30.4            | Set                                                                                                                | 16.00                                      | 23.00                                                    | 20.00                                                    | 59.00                                               |                                                      |                |                |       |
| Pt(NH <sub>3</sub> ) <sub>4</sub> (NO <sub>3</sub> ) <sub>2</sub>                | 0.1667                 | (mg-Pt/L)       | P <sub>0</sub> (hPa)                         | 1006.0          | Calibrated                                                                                                         | 16.00                                      | 21.25                                                    | 20.30                                                    | 57.55                                               |                                                      |                |                |       |
| H <sub>2</sub> SO <sub>4</sub>                                                   | 0.01                   | (N)             | P (hPa)                                      | 1013.2          | Determination of final [H <sub>2</sub> O <sub>2</sub> ]                                                            | Sample (g)                                 | Absorbance (—)                                           | [H <sub>2</sub> O <sub>2</sub> ] (mmol L <sup>-1</sup> ) |                                                     |                                                      |                |                |       |
| NaBr                                                                             | 0.001                  | (N)             | Agitation (rpm)                              | 1202            |                                                                                                                    |                                            |                                                          |                                                          |                                                     | 0.505                                                | 0.845          | 56.44          |       |
| Comment:<br>Catalyst activation: H <sub>2</sub> gas 20 sccm at 303 K for 40 min. |                        |                 |                                              |                 | Analysis of H <sub>2</sub> O <sub>2</sub> formation selectivity and H <sub>2</sub> O <sub>2</sub> destruction rate |                                            |                                                          | S <sub>f</sub> (—)                                       | 0.4358                                              |                                                      |                |                |       |
|                                                                                  |                        |                 |                                              |                 |                                                                                                                    |                                            |                                                          | k <sub>d</sub> [Cat] (h <sup>-1</sup> )                  | 0.2014                                              |                                                      |                |                |       |
|                                                                                  |                        |                 |                                              |                 |                                                                                                                    |                                            |                                                          | R <sup>2</sup>                                           | 0.9999                                              |                                                      |                |                |       |
| GC calibration                                                                   |                        | GC count        |                                              |                 | Ratio of sensitivity (toward N <sub>2</sub> )                                                                      |                                            | Feed gas measurement                                     |                                                          |                                                     |                                                      |                |                |       |
| Timing                                                                           | No.                    | H <sub>2</sub>  | O <sub>2</sub>                               | N <sub>2</sub>  | H <sub>2</sub>                                                                                                     | O <sub>2</sub>                             |                                                          |                                                          |                                                     |                                                      |                |                |       |
| Before reaction                                                                  | 1                      | 1310468         | 191948                                       | 148703          | 0.0894                                                                                                             | 0.0893                                     | 0.811                                                    | T <sub>a</sub> (°C)                                      | 25.3                                                |                                                      |                |                |       |
|                                                                                  | 2                      | 1312993         | 192392                                       | 149045          | 0.0895                                                                                                             |                                            |                                                          | 0.811                                                    | P <sub>0</sub> (hPa)                                | 1005.8                                               |                |                |       |
|                                                                                  | 3                      | 1310698         | 191888                                       | 148481          | 0.0893                                                                                                             |                                            |                                                          | 0.810                                                    | Flow (cc/min)                                       |                                                      |                |                |       |
| After reaction                                                                   | 4                      | 1307344         | 191172                                       | 148007          | 0.0892                                                                                                             |                                            |                                                          | 0.810                                                    | H <sub>2</sub>                                      | 18.19                                                |                |                |       |
|                                                                                  | 5                      | 1307799         | 191302                                       | 148067          | 0.0892                                                                                                             |                                            |                                                          | 0.810                                                    | O <sub>2</sub>                                      | 24.16                                                |                |                |       |
|                                                                                  | 6                      | 1307582         | 191284                                       | 148104          | 0.0893                                                                                                             |                                            |                                                          | 0.810                                                    | N <sub>2</sub>                                      | 23.08                                                |                |                |       |
| Time                                                                             |                        | GC count        |                                              |                 |                                                                                                                    | t <sub>correct</sub> (min)                 | Outlet flow (sccm)                                       |                                                          | Conversion(%)                                       |                                                      |                |                |       |
| H                                                                                | M                      | S               | min.                                         | H <sub>2</sub>  |                                                                                                                    |                                            | O <sub>2</sub>                                           | N <sub>2</sub>                                           | H <sub>2</sub>                                      | O <sub>2</sub>                                       | H <sub>2</sub> | O <sub>2</sub> |       |
| 10                                                                               | 52                     | 0               | 4.0                                          | 628502          |                                                                                                                    |                                            | 115003                                                   | 259728                                                   | 0.00                                                | 6.72                                                 | 14.60          | 57.99          | 31.32 |
| 11                                                                               | 2                      | 2               | 14.0                                         | 735024          |                                                                                                                    |                                            | 171908                                                   | 203263                                                   | 10.97                                               | 6.72                                                 | 14.66          | 58.03          | 31.02 |
| 11                                                                               | 12                     | 6               | 24.1                                         | 735393          |                                                                                                                    |                                            | 177267                                                   | 199019                                                   | 21.04                                               | 6.71                                                 | 14.72          | 58.06          | 30.75 |
| 11                                                                               | 22                     | 8               | 34.1                                         | 733118          |                                                                                                                    |                                            | 177974                                                   | 198273                                                   | 31.07                                               | 6.70                                                 | 14.77          | 58.10          | 30.50 |
| 11                                                                               | 32                     | 12              | 44.2                                         | 731560          |                                                                                                                    |                                            | 178593                                                   | 198009                                                   | 41.14                                               | 6.70                                                 | 14.84          | 58.13          | 30.16 |
| 11                                                                               | 42                     | 14              | 54.2                                         | 729743          |                                                                                                                    |                                            | 178832                                                   | 197677                                                   | 51.17                                               | 6.69                                                 | 14.89          | 58.16          | 29.95 |
| 11                                                                               | 52                     | 16              | 64.3                                         | 728623          |                                                                                                                    |                                            | 179162                                                   | 197236                                                   | 61.20                                               | 6.70                                                 | 14.95          | 58.13          | 29.67 |
| 12                                                                               | 2                      | 20              | 74.3                                         | 727274          |                                                                                                                    |                                            | 179850                                                   | 197246                                                   | 71.27                                               | 6.69                                                 | 15.00          | 58.21          | 29.40 |
| 12                                                                               | 12                     | 22              | 84.4                                         | 728069          |                                                                                                                    |                                            | 180254                                                   | 196972                                                   | 81.30                                               | 6.70                                                 | 15.06          | 58.11          | 29.14 |
| 12                                                                               | 22                     | 26              | 94.4                                         | 724958          |                                                                                                                    |                                            | 179842                                                   | 195575                                                   | 91.37                                               | 6.72                                                 | 15.13          | 57.99          | 28.80 |
| 12                                                                               | 32                     | 28              | 104.5                                        | 726573          |                                                                                                                    |                                            | 180620                                                   | 195609                                                   | 101.40                                              | 6.73                                                 | 15.19          | 57.91          | 28.51 |
| 12                                                                               | 42                     | 32              | 114.5                                        | 728310          | 181203                                                                                                             | 195467                                     | 111.47                                                   | 6.76                                                     | 15.25                                               | 57.77                                                | 28.22          |                |       |
| 12                                                                               | 52                     | 34              | 124.6                                        | 729936          | 181314                                                                                                             | 195087                                     | 121.50                                                   | 6.78                                                     | 15.29                                               | 57.60                                                | 28.04          |                |       |
| t <sub>correct</sub> (min)                                                       | Partial pressure (kPa) |                 | Rate (mmol L <sup>-1</sup> h <sup>-1</sup> ) |                 | d[H <sub>2</sub> O <sub>2</sub> ]/dt (mmol L <sup>-1</sup> h <sup>-1</sup> )                                       | Σ[H <sub>2</sub> ] (mmol L <sup>-1</sup> ) | [H <sub>2</sub> O <sub>2</sub> ] (mmol L <sup>-1</sup> ) | S <sub>e</sub> (—)                                       | Σ <sub>2</sub> [H <sub>2</sub> O <sub>2</sub> ] (h) | Σ <sub>1</sub> /[H <sub>2</sub> O <sub>2</sub> ] (—) |                |                |       |
|                                                                                  | P <sub>H2</sub>        | P <sub>O2</sub> | r <sub>H2</sub>                              | r <sub>O2</sub> |                                                                                                                    |                                            |                                                          |                                                          |                                                     |                                                      |                |                |       |
| 0.00                                                                             | 15.67                  | 34.04           | 82.85                                        | 59.42           | 36.00                                                                                                              | 0.00                                       | 0.00                                                     |                                                          | 0.000                                               | 0.000                                                |                |                |       |
| 10.97                                                                            | 15.64                  | 34.14           | 82.90                                        | 58.86           | 34.82                                                                                                              | 15.15                                      | 6.47                                                     | 0.43                                                     | 0.091                                               | 2.340                                                |                |                |       |
| 21.04                                                                            | 15.61                  | 34.23           | 82.94                                        | 58.34           | 33.74                                                                                                              | 29.06                                      | 12.23                                                    | 0.42                                                     | 0.177                                               | 2.377                                                |                |                |       |
| 31.07                                                                            | 15.58                  | 34.32           | 82.99                                        | 57.87           | 32.74                                                                                                              | 42.94                                      | 17.79                                                    | 0.41                                                     | 0.263                                               | 2.414                                                |                |                |       |
| 41.14                                                                            | 15.54                  | 34.43           | 83.04                                        | 57.23           | 31.43                                                                                                              | 56.87                                      | 23.17                                                    | 0.41                                                     | 0.350                                               | 2.454                                                |                |                |       |
| 51.17                                                                            | 15.51                  | 34.50           | 83.09                                        | 56.83           | 30.58                                                                                                              | 70.76                                      | 28.35                                                    | 0.40                                                     | 0.438                                               | 2.496                                                |                |                |       |
| 61.20                                                                            | 15.50                  | 34.59           | 83.05                                        | 56.29           | 29.53                                                                                                              | 84.65                                      | 33.38                                                    | 0.39                                                     | 0.527                                               | 2.536                                                |                |                |       |
| 71.27                                                                            | 15.46                  | 34.68           | 83.16                                        | 55.78           | 28.41                                                                                                              | 98.59                                      | 38.24                                                    | 0.39                                                     | 0.617                                               | 2.578                                                |                |                |       |
| 81.30                                                                            | 15.47                  | 34.75           | 83.01                                        | 55.30           | 27.58                                                                                                              | 112.48                                     | 42.92                                                    | 0.38                                                     | 0.708                                               | 2.621                                                |                |                |       |
| 91.37                                                                            | 15.48                  | 34.84           | 82.84                                        | 54.65           | 26.45                                                                                                              | 126.40                                     | 47.45                                                    | 0.38                                                     | 0.800                                               | 2.664                                                |                |                |       |
| 101.40                                                                           | 15.48                  | 34.93           | 82.72                                        | 54.09           | 25.45                                                                                                              | 140.24                                     | 51.79                                                    | 0.37                                                     | 0.893                                               | 2.708                                                |                |                |       |
| 111.47                                                                           | 15.50                  | 35.00           | 82.53                                        | 53.55           | 24.57                                                                                                              | 154.10                                     | 55.99                                                    | 0.36                                                     | 0.988                                               | 2.752                                                |                |                |       |
| 121.50                                                                           | 15.54                  | 35.03           | 82.28                                        | 53.20           | 24.12                                                                                                              | 167.88                                     | 60.06                                                    | 0.36                                                     | 1.082                                               | 2.795                                                |                |                |       |

## H<sub>2</sub>O<sub>2</sub> Synthesis Data Sheet

Entry No. 34 (Exp. Y48) Employed in: Fig 4 Fig 5 Fig 9

| Catalyst, Additives                                                              |                        |                 | Reaction conditions                          |                 | Gas feed rate (sccm)                                                                                               |                                            |                                                          |                                                          |                                                     |                                                      |                |
|----------------------------------------------------------------------------------|------------------------|-----------------|----------------------------------------------|-----------------|--------------------------------------------------------------------------------------------------------------------|--------------------------------------------|----------------------------------------------------------|----------------------------------------------------------|-----------------------------------------------------|------------------------------------------------------|----------------|
| Name                                                                             | Conc.                  | (Unit)          | T <sub>0</sub> (°C)                          | 25.2            |                                                                                                                    | H <sub>2</sub>                             | O <sub>2</sub>                                           | N <sub>2</sub>                                           | Sum                                                 |                                                      |                |
| Pd-PVP                                                                           | 8.33                   | (mg/L)          | T (°C)                                       | 30.4            | Set                                                                                                                | 16.00                                      | 24.00                                                    | 20.00                                                    | 60.00                                               |                                                      |                |
| Pt(NH <sub>3</sub> ) <sub>4</sub> (NO <sub>3</sub> ) <sub>2</sub>                | 0.25                   | (mg-Pt/L)       | P <sub>0</sub> (hPa)                         | 1000.2          | Calibrated                                                                                                         | 16.11                                      | 22.25                                                    | 20.38                                                    | 58.74                                               |                                                      |                |
| H <sub>2</sub> SO <sub>4</sub>                                                   | 0.01                   | (N)             | P (hPa)                                      | 1007.5          | Determination of final [H <sub>2</sub> O <sub>2</sub> ]                                                            | Sample (g)                                 | Absorbance (—)                                           | [H <sub>2</sub> O <sub>2</sub> ] (mmol L <sup>-1</sup> ) |                                                     |                                                      |                |
| NaBr                                                                             | 0.001                  | (N)             | Agitation (rpm)                              | 1200            |                                                                                                                    |                                            |                                                          |                                                          | 0.693                                               | 1.142                                                | 56.59          |
| Comment:<br>Catalyst activation: H <sub>2</sub> gas 20 sccm at 303 K for 40 min. |                        |                 |                                              |                 | Analysis of H <sub>2</sub> O <sub>2</sub> formation selectivity and H <sub>2</sub> O <sub>2</sub> destruction rate |                                            |                                                          | S <sub>f</sub> (—)                                       | 0.4237                                              |                                                      |                |
|                                                                                  |                        |                 |                                              |                 |                                                                                                                    |                                            |                                                          | k <sub>d</sub> [Cat] (h <sup>-1</sup> )                  | 0.1503                                              |                                                      |                |
|                                                                                  |                        |                 |                                              |                 |                                                                                                                    |                                            |                                                          | R <sup>2</sup>                                           | 0.9998                                              |                                                      |                |
| GC calibration                                                                   |                        | GC count        |                                              |                 | Ratio of sensitivity (toward N <sub>2</sub> )                                                                      |                                            | Feed gas measurement                                     |                                                          |                                                     |                                                      |                |
| Timing                                                                           | No.                    | H <sub>2</sub>  | O <sub>2</sub>                               | N <sub>2</sub>  | H <sub>2</sub>                                                                                                     | O <sub>2</sub>                             |                                                          |                                                          |                                                     |                                                      |                |
| Before reaction                                                                  | 1                      | 1291266         | 197315                                       | 146642          | 0.0898                                                                                                             | 0.0895                                     | 0.811                                                    | T <sub>a</sub> (°C)                                      | 24.8                                                |                                                      |                |
|                                                                                  | 2                      | 1291431         | 197102                                       | 146458          | 0.0896                                                                                                             |                                            |                                                          | 0.811                                                    | P <sub>0</sub> (hPa)                                | 1000.8                                               |                |
|                                                                                  | 3                      | 1291907         | 197001                                       | 146326          | 0.0895                                                                                                             |                                            |                                                          | 0.811                                                    | Flow (cc/min)                                       |                                                      |                |
| After reaction                                                                   | 4                      | 1287919         | 196049                                       | 145516          | 0.0893                                                                                                             |                                            |                                                          | 0.810                                                    | H <sub>2</sub>                                      | 18.36                                                |                |
|                                                                                  | 5                      | 1288025         | 196096                                       | 145569          | 0.0893                                                                                                             |                                            |                                                          | 0.810                                                    | O <sub>2</sub>                                      | 25.36                                                |                |
|                                                                                  | 6                      | 1288070         | 196097                                       | 145563          | 0.0893                                                                                                             |                                            |                                                          | 0.810                                                    | N <sub>2</sub>                                      | 23.23                                                |                |
| Time                                                                             |                        |                 |                                              | GC count        |                                                                                                                    |                                            | t <sub>correct</sub> (min)                               | Outlet flow (sccm)                                       |                                                     | Conversion(%)                                        |                |
| H                                                                                | M                      | S               | min.                                         | H <sub>2</sub>  | O <sub>2</sub>                                                                                                     | N <sub>2</sub>                             |                                                          | H <sub>2</sub>                                           | O <sub>2</sub>                                      | H <sub>2</sub>                                       | O <sub>2</sub> |
| 13                                                                               | 13                     | 52              | 4.0                                          | 610786          | 120104                                                                                                             | 257384                                     | 0.00                                                     | 6.37                                                     | 15.33                                               | 60.44                                                | 31.12          |
| 13                                                                               | 23                     | 54              | 14.0                                         | 694399          | 178966                                                                                                             | 201587                                     | 11.20                                                    | 6.41                                                     | 15.40                                               | 60.24                                                | 30.79          |
| 13                                                                               | 33                     | 58              | 24.1                                         | 696246          | 184001                                                                                                             | 197123                                     | 21.27                                                    | 6.43                                                     | 15.47                                               | 60.05                                                | 30.48          |
| 13                                                                               | 44                     | 0               | 34.1                                         | 696285          | 184663                                                                                                             | 196446                                     | 31.30                                                    | 6.46                                                     | 15.53                                               | 59.87                                                | 30.19          |
| 13                                                                               | 54                     | 4               | 44.2                                         | 697500          | 185034                                                                                                             | 195857                                     | 41.37                                                    | 6.49                                                     | 15.61                                               | 59.68                                                | 29.84          |
| 14                                                                               | 4                      | 6               | 54.2                                         | 698791          | 185268                                                                                                             | 195366                                     | 51.40                                                    | 6.52                                                     | 15.67                                               | 59.51                                                | 29.57          |
| 14                                                                               | 14                     | 10              | 64.3                                         | 698946          | 185592                                                                                                             | 195003                                     | 61.47                                                    | 6.54                                                     | 15.73                                               | 59.42                                                | 29.32          |
| 14                                                                               | 24                     | 12              | 74.3                                         | 699189          | 185769                                                                                                             | 194462                                     | 71.50                                                    | 6.56                                                     | 15.79                                               | 59.30                                                | 29.05          |
| 14                                                                               | 34                     | 16              | 84.4                                         | 699965          | 186095                                                                                                             | 194049                                     | 81.57                                                    | 6.58                                                     | 15.85                                               | 59.16                                                | 28.78          |
| 14                                                                               | 44                     | 18              | 94.4                                         | 699321          | 186157                                                                                                             | 193483                                     | 91.60                                                    | 6.59                                                     | 15.90                                               | 59.08                                                | 28.55          |
| 14                                                                               | 54                     | 22              | 104.5                                        | 700561          | 186516                                                                                                             | 193136                                     | 101.67                                                   | 6.61                                                     | 15.96                                               | 58.94                                                | 28.28          |
| 15                                                                               | 4                      | 24              | 114.5                                        | 702702          | 187051                                                                                                             | 192968                                     | 111.70                                                   | 6.64                                                     | 16.02                                               | 58.77                                                | 28.01          |
| 15                                                                               | 14                     | 28              | 124.6                                        | 702702          | 187051                                                                                                             | 192968                                     | 121.77                                                   | 6.64                                                     | 16.02                                               | 58.77                                                | 28.01          |
| t <sub>correct</sub> (min)                                                       | Partial pressure (kPa) |                 | Rate (mmol L <sup>-1</sup> h <sup>-1</sup> ) |                 | d[H <sub>2</sub> O <sub>2</sub> ]/dt (mmol L <sup>-1</sup> h <sup>-1</sup> )                                       | Σ[H <sub>2</sub> ] (mmol L <sup>-1</sup> ) | [H <sub>2</sub> O <sub>2</sub> ] (mmol L <sup>-1</sup> ) | S <sub>e</sub> (—)                                       | Σ <sub>2</sub> [H <sub>2</sub> O <sub>2</sub> ] (h) | Σ <sub>1</sub> /[H <sub>2</sub> O <sub>2</sub> ] (—) |                |
|                                                                                  | P <sub>H2</sub>        | P <sub>O2</sub> | r <sub>H2</sub>                              | r <sub>O2</sub> |                                                                                                                    |                                            |                                                          |                                                          |                                                     |                                                      |                |
| 0.00                                                                             | 14.61                  | 35.14           | 86.93                                        | 61.83           | 36.74                                                                                                              | 0.00                                       | 0.00                                                     |                                                          | 0.000                                               | 0.000                                                |                |
| 11.20                                                                            | 14.65                  | 35.22           | 86.64                                        | 61.16           | 35.69                                                                                                              | 16.21                                      | 6.76                                                     | 0.42                                                     | 0.093                                               | 2.396                                                |                |
| 21.27                                                                            | 14.68                  | 35.30           | 86.37                                        | 60.55           | 34.73                                                                                                              | 30.72                                      | 12.67                                                    | 0.41                                                     | 0.178                                               | 2.425                                                |                |
| 31.30                                                                            | 14.72                  | 35.37           | 86.12                                        | 59.98           | 33.84                                                                                                              | 45.14                                      | 18.40                                                    | 0.41                                                     | 0.264                                               | 2.453                                                |                |
| 41.37                                                                            | 14.75                  | 35.46           | 85.84                                        | 59.28           | 32.72                                                                                                              | 59.57                                      | 23.99                                                    | 0.40                                                     | 0.351                                               | 2.483                                                |                |
| 51.40                                                                            | 14.78                  | 35.52           | 85.59                                        | 58.75           | 31.92                                                                                                              | 73.90                                      | 29.39                                                    | 0.40                                                     | 0.438                                               | 2.514                                                |                |
| 61.47                                                                            | 14.79                  | 35.59           | 85.47                                        | 58.25           | 31.03                                                                                                              | 88.25                                      | 34.67                                                    | 0.39                                                     | 0.526                                               | 2.545                                                |                |
| 71.50                                                                            | 14.81                  | 35.66           | 85.28                                        | 57.72           | 30.16                                                                                                              | 102.53                                     | 39.79                                                    | 0.39                                                     | 0.615                                               | 2.577                                                |                |
| 81.57                                                                            | 14.83                  | 35.73           | 85.09                                        | 57.17           | 29.25                                                                                                              | 116.82                                     | 44.77                                                    | 0.38                                                     | 0.705                                               | 2.609                                                |                |
| 91.60                                                                            | 14.84                  | 35.79           | 84.98                                        | 56.71           | 28.45                                                                                                              | 131.04                                     | 49.59                                                    | 0.38                                                     | 0.796                                               | 2.642                                                |                |
| 101.67                                                                           | 14.86                  | 35.85           | 84.77                                        | 56.18           | 27.60                                                                                                              | 145.28                                     | 54.30                                                    | 0.37                                                     | 0.887                                               | 2.676                                                |                |
| 111.70                                                                           | 14.89                  | 35.92           | 84.53                                        | 55.65           | 26.77                                                                                                              | 159.43                                     | 58.84                                                    | 0.37                                                     | 0.979                                               | 2.710                                                |                |
| 121.77                                                                           | 14.89                  | 35.92           | 84.53                                        | 55.65           | 26.77                                                                                                              | 173.62                                     | 63.33                                                    | 0.36                                                     | 1.072                                               | 2.741                                                |                |

## H<sub>2</sub>O<sub>2</sub> Synthesis Data Sheet

Entry No. 35 (Exp. Y47) Employed in: Fig 4 Fig 5 Fig 9

| Catalyst, Additives                                                              |                        |                 | Reaction conditions                          |                 | Gas feed rate (sccm)                                                                                               |                                            |                                                          |                                                          |                                                     |                                                      |       |       |
|----------------------------------------------------------------------------------|------------------------|-----------------|----------------------------------------------|-----------------|--------------------------------------------------------------------------------------------------------------------|--------------------------------------------|----------------------------------------------------------|----------------------------------------------------------|-----------------------------------------------------|------------------------------------------------------|-------|-------|
| Name                                                                             | Conc.                  | (Unit)          | T <sub>0</sub> (°C)                          | 25.9            |                                                                                                                    | H <sub>2</sub>                             | O <sub>2</sub>                                           | N <sub>2</sub>                                           | Sum                                                 |                                                      |       |       |
| Pd-PVP                                                                           | 8.33                   | (mg/L)          | T (°C)                                       | 30.5            | Set                                                                                                                | 16.00                                      | 24.00                                                    | 20.00                                                    | 60.00                                               |                                                      |       |       |
| Pt(NH <sub>3</sub> ) <sub>4</sub> (NO <sub>3</sub> ) <sub>2</sub>                | 0.417                  | (mg-Pt/L)       | P <sub>0</sub> (hPa)                         | 1000.8          | Calibrated                                                                                                         | 16.00                                      | 22.25                                                    | 20.29                                                    | 58.55                                               |                                                      |       |       |
| H <sub>2</sub> SO <sub>4</sub>                                                   | 0.01                   | (N)             | P (hPa)                                      | 1008.1          | Determination of final [H <sub>2</sub> O <sub>2</sub> ]                                                            | Sample (g)                                 | Absorbance (—)                                           | [H <sub>2</sub> O <sub>2</sub> ] (mmol L <sup>-1</sup> ) |                                                     |                                                      |       |       |
| NaBr                                                                             | 0.001                  | (N)             | Agitation (rpm)                              | 1200            |                                                                                                                    |                                            |                                                          |                                                          | 0.555                                               | 1.005                                                | 62.14 |       |
| Comment:<br>Catalyst activation: H <sub>2</sub> gas 20 sccm at 303 K for 40 min. |                        |                 |                                              |                 | Analysis of H <sub>2</sub> O <sub>2</sub> formation selectivity and H <sub>2</sub> O <sub>2</sub> destruction rate |                                            |                                                          | S <sub>f</sub> (—)                                       | 0.4251                                              |                                                      |       |       |
|                                                                                  |                        |                 |                                              |                 |                                                                                                                    |                                            |                                                          | k <sub>d</sub> [Cat] (h <sup>-1</sup> )                  | 0.1351                                              |                                                      |       |       |
|                                                                                  |                        |                 |                                              |                 |                                                                                                                    |                                            |                                                          | R <sup>2</sup>                                           | 0.9991                                              |                                                      |       |       |
| GC calibration                                                                   |                        | GC count        |                                              |                 | Ratio of sensitivity (toward N <sub>2</sub> )                                                                      |                                            | Feed gas measurement                                     |                                                          |                                                     |                                                      |       |       |
| Timing                                                                           | No.                    | H <sub>2</sub>  | O <sub>2</sub>                               | N <sub>2</sub>  | H <sub>2</sub>                                                                                                     | O <sub>2</sub>                             |                                                          |                                                          |                                                     |                                                      |       |       |
| Before reaction                                                                  | 1                      | 1284583         | 196159                                       | 145814          | 0.0895                                                                                                             | 0.0894                                     | 0.816                                                    | T <sub>a</sub> (°C)                                      | 25.7                                                |                                                      |       |       |
|                                                                                  | 2                      | 1284395         | 196076                                       | 145784          | 0.0895                                                                                                             |                                            |                                                          | 0.816                                                    | P <sub>0</sub> (hPa)                                | 1001.8                                               |       |       |
|                                                                                  | 3                      | 1284148         | 195923                                       | 145685          | 0.0895                                                                                                             |                                            |                                                          | 0.816                                                    | Flow (cc/min)                                       |                                                      |       |       |
| After reaction                                                                   | 4                      | 1281780         | 195217                                       | 145141          | 0.0893                                                                                                             |                                            |                                                          | 0.816                                                    | H <sub>2</sub>                                      | 18.31                                                |       |       |
|                                                                                  | 5                      | 1281804         | 195236                                       | 145128          | 0.0893                                                                                                             |                                            |                                                          | 0.815                                                    | O <sub>2</sub>                                      | 25.46                                                |       |       |
|                                                                                  | 6                      | 1281216         | 195163                                       | 145091          | 0.0893                                                                                                             |                                            |                                                          | 0.816                                                    | N <sub>2</sub>                                      | 23.21                                                |       |       |
| Time                                                                             |                        | GC count        |                                              |                 | t <sub>correct</sub> (min)                                                                                         | Outlet flow (sccm)                         |                                                          | Conversion(%)                                            |                                                     |                                                      |       |       |
| H                                                                                | M                      | S               | min.                                         | H <sub>2</sub>  |                                                                                                                    | O <sub>2</sub>                             | N <sub>2</sub>                                           | H <sub>2</sub>                                           | O <sub>2</sub>                                      |                                                      |       |       |
| 18                                                                               | 4                      | 26              | 4.0                                          | 606553          |                                                                                                                    | 119746                                     | 255146                                                   | 0.00                                                     | 6.37                                                | 15.40                                                | 60.18 | 30.81 |
| 18                                                                               | 14                     | 28              | 14.0                                         | 688543          |                                                                                                                    | 177822                                     | 199842                                                   | 11.17                                                    | 6.40                                                | 15.46                                                | 59.99 | 30.51 |
| 18                                                                               | 24                     | 32              | 24.1                                         | 690783          |                                                                                                                    | 182773                                     | 195467                                                   | 21.24                                                    | 6.43                                                | 15.52                                                | 59.83 | 30.24 |
| 18                                                                               | 34                     | 34              | 34.1                                         | 692882          |                                                                                                                    | 183421                                     | 194718                                                   | 31.27                                                    | 6.46                                                | 15.59                                                | 59.66 | 29.97 |
| 18                                                                               | 44                     | 38              | 44.2                                         | 693647          |                                                                                                                    | 183589                                     | 194189                                                   | 41.34                                                    | 6.48                                                | 15.64                                                | 59.51 | 29.71 |
| 18                                                                               | 54                     | 40              | 54.2                                         | 695252          |                                                                                                                    | 183957                                     | 193789                                                   | 51.37                                                    | 6.51                                                | 15.71                                                | 59.33 | 29.43 |
| 19                                                                               | 4                      | 42              | 64.3                                         | 693617          |                                                                                                                    | 184160                                     | 193586                                                   | 61.41                                                    | 6.50                                                | 15.74                                                | 59.38 | 29.27 |
| 19                                                                               | 14                     | 46              | 74.3                                         | 694457          |                                                                                                                    | 184546                                     | 193307                                                   | 71.47                                                    | 6.52                                                | 15.80                                                | 59.28 | 29.02 |
| 19                                                                               | 24                     | 48              | 84.4                                         | 693917          |                                                                                                                    | 184726                                     | 192943                                                   | 81.51                                                    | 6.53                                                | 15.84                                                | 59.23 | 28.82 |
| 19                                                                               | 34                     | 52              | 94.4                                         | 695286          |                                                                                                                    | 185169                                     | 192614                                                   | 91.57                                                    | 6.55                                                | 15.91                                                | 59.08 | 28.53 |
| 19                                                                               | 44                     | 54              | 104.5                                        | 695229          |                                                                                                                    | 185410                                     | 192249                                                   | 101.61                                                   | 6.56                                                | 15.96                                                | 59.01 | 28.30 |
| 19                                                                               | 54                     | 58              | 114.5                                        | 695920          | 185728                                                                                                             | 191951                                     | 111.67                                                   | 6.58                                                     | 16.01                                               | 58.90                                                | 28.07 |       |
| 20                                                                               | 5                      | 0               | 124.6                                        | 697818          | 186164                                                                                                             | 191662                                     | 121.71                                                   | 6.61                                                     | 16.07                                               | 58.73                                                | 27.79 |       |
| t <sub>correct</sub> (min)                                                       | Partial pressure (kPa) |                 | Rate (mmol L <sup>-1</sup> h <sup>-1</sup> ) |                 | d[H <sub>2</sub> O <sub>2</sub> ]/dt (mmol L <sup>-1</sup> h <sup>-1</sup> )                                       | Σ[H <sub>2</sub> ] (mmol L <sup>-1</sup> ) | [H <sub>2</sub> O <sub>2</sub> ] (mmol L <sup>-1</sup> ) | S <sub>e</sub> (—)                                       | Σ <sub>2</sub> [H <sub>2</sub> O <sub>2</sub> ] (h) | Σ <sub>1</sub> /[H <sub>2</sub> O <sub>2</sub> ] (—) |       |       |
|                                                                                  | P <sub>H2</sub>        | P <sub>O2</sub> | r <sub>H2</sub>                              | r <sub>O2</sub> |                                                                                                                    |                                            |                                                          |                                                          |                                                     |                                                      |       |       |
| 0.00                                                                             | 14.63                  | 35.35           | 85.99                                        | 61.21           | 36.43                                                                                                              | 0.00                                       | 0.00                                                     |                                                          | 0.000                                               | 0.000                                                |       |       |
| 11.17                                                                            | 14.66                  | 35.42           | 85.73                                        | 60.62           | 35.52                                                                                                              | 15.99                                      | 6.70                                                     | 0.42                                                     | 0.093                                               | 2.387                                                |       |       |
| 21.24                                                                            | 14.70                  | 35.49           | 85.50                                        | 60.09           | 34.68                                                                                                              | 30.35                                      | 12.59                                                    | 0.41                                                     | 0.178                                               | 2.411                                                |       |       |
| 31.27                                                                            | 14.73                  | 35.55           | 85.26                                        | 59.55           | 33.84                                                                                                              | 44.63                                      | 18.32                                                    | 0.41                                                     | 0.263                                               | 2.436                                                |       |       |
| 41.34                                                                            | 14.75                  | 35.61           | 85.04                                        | 59.04           | 33.04                                                                                                              | 58.92                                      | 23.93                                                    | 0.41                                                     | 0.350                                               | 2.462                                                |       |       |
| 51.37                                                                            | 14.79                  | 35.68           | 84.78                                        | 58.47           | 32.16                                                                                                              | 73.11                                      | 29.38                                                    | 0.40                                                     | 0.437                                               | 2.489                                                |       |       |
| 61.41                                                                            | 14.76                  | 35.74           | 84.86                                        | 58.17           | 31.48                                                                                                              | 87.30                                      | 34.70                                                    | 0.40                                                     | 0.524                                               | 2.516                                                |       |       |
| 71.47                                                                            | 14.77                  | 35.80           | 84.70                                        | 57.67           | 30.64                                                                                                              | 101.52                                     | 39.91                                                    | 0.39                                                     | 0.612                                               | 2.544                                                |       |       |
| 81.51                                                                            | 14.77                  | 35.86           | 84.64                                        | 57.27           | 29.90                                                                                                              | 115.68                                     | 44.97                                                    | 0.39                                                     | 0.701                                               | 2.572                                                |       |       |
| 91.57                                                                            | 14.80                  | 35.93           | 84.42                                        | 56.69           | 28.95                                                                                                              | 129.86                                     | 49.91                                                    | 0.38                                                     | 0.791                                               | 2.602                                                |       |       |
| 101.61                                                                           | 14.80                  | 36.00           | 84.32                                        | 56.23           | 28.14                                                                                                              | 143.97                                     | 54.68                                                    | 0.38                                                     | 0.882                                               | 2.633                                                |       |       |
| 111.67                                                                           | 14.82                  | 36.06           | 84.17                                        | 55.77           | 27.36                                                                                                              | 158.11                                     | 59.34                                                    | 0.38                                                     | 0.974                                               | 2.664                                                |       |       |
| 121.71                                                                           | 14.85                  | 36.12           | 83.92                                        | 55.21           | 26.51                                                                                                              | 172.16                                     | 63.84                                                    | 0.37                                                     | 1.067                                               | 2.697                                                |       |       |

## H<sub>2</sub>O<sub>2</sub> Synthesis Data Sheet

Entry No. 36 (Exp. Y51) Employed in: Fig 4 Fig 5 Fig 9

| Catalyst, Additives                                                              |                        |                 | Reaction conditions                          |                 | Gas feed rate (sccm)                                                                                               |                                            |                                                          |                                                          |                                                     |                                                      |                |
|----------------------------------------------------------------------------------|------------------------|-----------------|----------------------------------------------|-----------------|--------------------------------------------------------------------------------------------------------------------|--------------------------------------------|----------------------------------------------------------|----------------------------------------------------------|-----------------------------------------------------|------------------------------------------------------|----------------|
| Name                                                                             | Conc.                  | (Unit)          | T <sub>0</sub> (°C)                          | 25.5            |                                                                                                                    | H <sub>2</sub>                             | O <sub>2</sub>                                           | N <sub>2</sub>                                           | Sum                                                 |                                                      |                |
| Pd-PVP                                                                           | 8.33                   | (mg/L)          | T (°C)                                       | 30.6            | Set                                                                                                                | 18.50                                      | 25.00                                                    | 20.00                                                    | 63.50                                               |                                                      |                |
| Pt(NH <sub>3</sub> ) <sub>4</sub> (NO <sub>3</sub> ) <sub>2</sub>                | 0.417                  | (mg-Pt/L)       | P <sub>0</sub> (hPa)                         | 1006.0          | Calibrated                                                                                                         | 18.57                                      | 23.18                                                    | 20.25                                                    | 62.00                                               |                                                      |                |
| H <sub>2</sub> SO <sub>4</sub>                                                   | 0.01                   | (N)             | P (hPa)                                      | 1013.6          | Determination of final [H <sub>2</sub> O <sub>2</sub> ]                                                            | Sample (g)                                 | Absorbance (—)                                           | [H <sub>2</sub> O <sub>2</sub> ] (mmol L <sup>-1</sup> ) |                                                     |                                                      |                |
| NaBr                                                                             | 0.001                  | (N)             | Agitation (rpm)                              | 1200            |                                                                                                                    |                                            |                                                          |                                                          |                                                     | 0.585                                                | 1.109          |
| Comment:<br>Catalyst activation: H <sub>2</sub> gas 20 sccm at 303 K for 40 min. |                        |                 |                                              |                 | Analysis of H <sub>2</sub> O <sub>2</sub> formation selectivity and H <sub>2</sub> O <sub>2</sub> destruction rate |                                            |                                                          | S <sub>f</sub> (—)                                       | 0.4055                                              |                                                      |                |
|                                                                                  |                        |                 |                                              |                 |                                                                                                                    |                                            |                                                          | k <sub>d</sub> [Cat] (h <sup>-1</sup> )                  | 0.1852                                              |                                                      |                |
|                                                                                  |                        |                 |                                              |                 |                                                                                                                    |                                            |                                                          | R <sup>2</sup>                                           | 0.9998                                              |                                                      |                |
| GC calibration                                                                   |                        | GC count        |                                              |                 | Ratio of sensitivity (toward N <sub>2</sub> )                                                                      |                                            | Feed gas measurement                                     |                                                          |                                                     |                                                      |                |
| Timing                                                                           | No.                    | H <sub>2</sub>  | O <sub>2</sub>                               | N <sub>2</sub>  | H <sub>2</sub>                                                                                                     | O <sub>2</sub>                             |                                                          |                                                          |                                                     |                                                      |                |
| Before reaction                                                                  | 1                      | 1398155         | 193860                                       | 137926          | 0.0905                                                                                                             | 0.814                                      | 0.814                                                    | T <sub>a</sub> (°C)                                      | 25.7                                                |                                                      |                |
|                                                                                  | 2                      | 1398726         | 193833                                       | 137928          | 0.0904                                                                                                             | 0.815                                      |                                                          | P <sub>0</sub> (hPa)                                     | 1005.8                                              |                                                      |                |
|                                                                                  | 3                      | 1398317         | 193742                                       | 137892          | 0.0904                                                                                                             | 0.815                                      |                                                          | Flow (cc/min)                                            |                                                     |                                                      |                |
| After reaction                                                                   | 4                      | 1399341         | 193962                                       | 137913          | 0.0904                                                                                                             | 0.814                                      | H <sub>2</sub>                                           | 21.16                                                    |                                                     |                                                      |                |
|                                                                                  | 5                      | 1399115         | 194040                                       | 138014          | 0.0905                                                                                                             | 0.814                                      | O <sub>2</sub>                                           | 26.41                                                    |                                                     |                                                      |                |
|                                                                                  | 6                      | 1399646         | 194180                                       | 138159          | 0.0905                                                                                                             | 0.815                                      | N <sub>2</sub>                                           | 23.07                                                    |                                                     |                                                      |                |
| Time                                                                             |                        |                 |                                              | GC count        |                                                                                                                    |                                            | t <sub>correct</sub> (min)                               | Outlet flow (sccm)                                       |                                                     | Conversion(%)                                        |                |
| H                                                                                | M                      | S               | min.                                         | H <sub>2</sub>  | O <sub>2</sub>                                                                                                     | N <sub>2</sub>                             |                                                          | H <sub>2</sub>                                           | O <sub>2</sub>                                      | H <sub>2</sub>                                       | O <sub>2</sub> |
| 15                                                                               | 18                     | 20              | 4.0                                          | 679666          | 119574                                                                                                             | 250037                                     | 0.00                                                     | 7.29                                                     | 15.26                                               | 60.75                                                | 34.17          |
| 15                                                                               | 28                     | 22              | 14.0                                         | 770119          | 174846                                                                                                             | 196906                                     | 11.20                                                    | 7.33                                                     | 15.36                                               | 60.52                                                | 33.74          |
| 15                                                                               | 38                     | 26              | 24.1                                         | 773580          | 179741                                                                                                             | 192604                                     | 21.26                                                    | 7.37                                                     | 15.45                                               | 60.32                                                | 33.35          |
| 15                                                                               | 48                     | 28              | 34.1                                         | 775325          | 180678                                                                                                             | 191763                                     | 31.30                                                    | 7.41                                                     | 15.54                                               | 60.12                                                | 32.97          |
| 15                                                                               | 58                     | 32              | 44.2                                         | 777645          | 181240                                                                                                             | 191165                                     | 41.36                                                    | 7.45                                                     | 15.63                                               | 59.88                                                | 32.55          |
| 16                                                                               | 8                      | 34              | 54.2                                         | 778880          | 181745                                                                                                             | 190648                                     | 51.40                                                    | 7.48                                                     | 15.72                                               | 59.71                                                | 32.18          |
| 16                                                                               | 18                     | 38              | 64.3                                         | 779732          | 182127                                                                                                             | 190230                                     | 61.46                                                    | 7.51                                                     | 15.79                                               | 59.57                                                | 31.89          |
| 16                                                                               | 28                     | 40              | 74.3                                         | 781786          | 182778                                                                                                             | 189791                                     | 71.50                                                    | 7.55                                                     | 15.88                                               | 59.37                                                | 31.49          |
| 16                                                                               | 38                     | 44              | 84.4                                         | 782674          | 183336                                                                                                             | 189624                                     | 81.56                                                    | 7.56                                                     | 15.94                                               | 59.29                                                | 31.22          |
| 16                                                                               | 48                     | 46              | 94.4                                         | 782014          | 183083                                                                                                             | 188336                                     | 91.60                                                    | 7.61                                                     | 16.03                                               | 59.05                                                | 30.84          |
| 16                                                                               | 58                     | 48              | 104.5                                        | 786747          | 184122                                                                                                             | 188309                                     | 101.63                                                   | 7.65                                                     | 16.12                                               | 58.79                                                | 30.44          |
| 17                                                                               | 8                      | 52              | 114.5                                        | 788166          | 184571                                                                                                             | 187828                                     | 111.70                                                   | 7.69                                                     | 16.21                                               | 58.61                                                | 30.09          |
| 17                                                                               | 18                     | 54              | 124.6                                        | 790402          | 185019                                                                                                             | 187442                                     | 121.73                                                   | 7.72                                                     | 16.28                                               | 58.41                                                | 29.78          |
| t <sub>correct</sub> (min)                                                       | Partial pressure (kPa) |                 | Rate (mmol L <sup>-1</sup> h <sup>-1</sup> ) |                 | d[H <sub>2</sub> O <sub>2</sub> ]/dt (mmol L <sup>-1</sup> h <sup>-1</sup> )                                       | Σ[H <sub>2</sub> ] (mmol L <sup>-1</sup> ) | [H <sub>2</sub> O <sub>2</sub> ] (mmol L <sup>-1</sup> ) | S <sub>e</sub> (—)                                       | Σ <sub>2</sub> [H <sub>2</sub> O <sub>2</sub> ] (h) | Σ <sub>1</sub> /[H <sub>2</sub> O <sub>2</sub> ] (—) |                |
|                                                                                  | P <sub>H2</sub>        | P <sub>O2</sub> | r <sub>H2</sub>                              | r <sub>O2</sub> |                                                                                                                    |                                            |                                                          |                                                          |                                                     |                                                      |                |
| 0.00                                                                             | 16.54                  | 34.61           | 100.74                                       | 70.73           | 40.72                                                                                                              | 0.00                                       | 0.00                                                     |                                                          | 0.000                                               | 0.000                                                |                |
| 11.20                                                                            | 16.58                  | 34.73           | 100.36                                       | 69.84           | 39.31                                                                                                              | 18.77                                      | 7.47                                                     | 0.40                                                     | 0.093                                               | 2.513                                                |                |
| 21.26                                                                            | 16.61                  | 34.83           | 100.02                                       | 69.03           | 38.04                                                                                                              | 35.57                                      | 13.96                                                    | 0.39                                                     | 0.179                                               | 2.549                                                |                |
| 31.30                                                                            | 16.65                  | 34.93           | 99.70                                        | 68.24           | 36.77                                                                                                              | 52.27                                      | 20.21                                                    | 0.39                                                     | 0.265                                               | 2.586                                                |                |
| 41.36                                                                            | 16.70                  | 35.03           | 99.29                                        | 67.37           | 35.45                                                                                                              | 68.97                                      | 26.27                                                    | 0.38                                                     | 0.352                                               | 2.625                                                |                |
| 51.40                                                                            | 16.72                  | 35.13           | 99.01                                        | 66.60           | 34.19                                                                                                              | 85.55                                      | 32.09                                                    | 0.38                                                     | 0.440                                               | 2.666                                                |                |
| 61.46                                                                            | 16.74                  | 35.21           | 98.78                                        | 66.00           | 33.21                                                                                                              | 102.14                                     | 37.75                                                    | 0.37                                                     | 0.530                                               | 2.706                                                |                |
| 71.50                                                                            | 16.78                  | 35.31           | 98.45                                        | 65.16           | 31.88                                                                                                              | 118.63                                     | 43.19                                                    | 0.36                                                     | 0.620                                               | 2.747                                                |                |
| 81.56                                                                            | 16.78                  | 35.39           | 98.32                                        | 64.61           | 30.90                                                                                                              | 135.14                                     | 48.45                                                    | 0.36                                                     | 0.711                                               | 2.789                                                |                |
| 91.60                                                                            | 16.83                  | 35.47           | 97.91                                        | 63.83           | 29.75                                                                                                              | 151.54                                     | 53.52                                                    | 0.35                                                     | 0.803                                               | 2.831                                                |                |
| 101.63                                                                           | 16.88                  | 35.57           | 97.49                                        | 63.00           | 28.50                                                                                                              | 167.88                                     | 58.39                                                    | 0.35                                                     | 0.896                                               | 2.875                                                |                |
| 111.70                                                                           | 16.91                  | 35.65           | 97.19                                        | 62.28           | 27.36                                                                                                              | 184.21                                     | 63.08                                                    | 0.34                                                     | 0.991                                               | 2.920                                                |                |
| 121.73                                                                           | 16.95                  | 35.72           | 96.86                                        | 61.63           | 26.40                                                                                                              | 200.44                                     | 67.58                                                    | 0.34                                                     | 1.087                                               | 2.966                                                |                |

## H<sub>2</sub>O<sub>2</sub> Synthesis Data Sheet

Entry No. 37 (Exp. G59) Employed in: Fig. 6

| Catalyst, Additives                                                              |                        |                 | Reaction conditions                          |                 | Gas feed rate (sccm)                                                                                               |                                            |                                                          |                                                          |                                                     |                                                      |                |
|----------------------------------------------------------------------------------|------------------------|-----------------|----------------------------------------------|-----------------|--------------------------------------------------------------------------------------------------------------------|--------------------------------------------|----------------------------------------------------------|----------------------------------------------------------|-----------------------------------------------------|------------------------------------------------------|----------------|
| Name                                                                             | Conc.                  | (Unit)          | T <sub>0</sub> (°C)                          | 20.5            |                                                                                                                    | H <sub>2</sub>                             | O <sub>2</sub>                                           | N <sub>2</sub>                                           | Sum                                                 |                                                      |                |
| Pd-PVP                                                                           | 8.33                   | (mg/L)          | T (°C)                                       | 30.0            | Set                                                                                                                | 5.00                                       | 20.00                                                    | 20.00                                                    | 45.00                                               |                                                      |                |
| Pt(NH <sub>3</sub> ) <sub>4</sub> (NO <sub>3</sub> ) <sub>2</sub>                | 0.0833                 | (mg-Pt/L)       | P <sub>0</sub> (hPa)                         | 1006.3          | Calibrated                                                                                                         | 5.03                                       | 18.63                                                    | 19.92                                                    | 43.57                                               |                                                      |                |
| H <sub>2</sub> SO <sub>4</sub>                                                   | 0.01                   | (N)             | P (hPa)                                      | 1012.8          | Determination of final [H <sub>2</sub> O <sub>2</sub> ]                                                            | Sample (g)                                 | Absorbance (—)                                           | [H <sub>2</sub> O <sub>2</sub> ] (mmol L <sup>-1</sup> ) |                                                     |                                                      |                |
| NaBr                                                                             | 0.001                  | (N)             | Agitation (rpm)                              | 1200            |                                                                                                                    |                                            |                                                          |                                                          |                                                     | 1.024                                                | 0.717          |
| Comment:<br>Catalyst activation: H <sub>2</sub> gas 20 sccm at 303 K for 40 min. |                        |                 |                                              |                 | Analysis of H <sub>2</sub> O <sub>2</sub> formation selectivity and H <sub>2</sub> O <sub>2</sub> destruction rate |                                            |                                                          | S <sub>f</sub> (—)                                       | 0.5192                                              |                                                      |                |
|                                                                                  |                        |                 |                                              |                 |                                                                                                                    |                                            |                                                          | k <sub>d</sub> [Cat] (h <sup>-1</sup> )                  | 0.0955                                              |                                                      |                |
|                                                                                  |                        |                 |                                              |                 |                                                                                                                    |                                            |                                                          | R <sup>2</sup>                                           | 0.9886                                              |                                                      |                |
| GC calibration                                                                   |                        | GC count        |                                              |                 | Ratio of sensitivity (toward N <sub>2</sub> )                                                                      |                                            | Feed gas measurement                                     |                                                          |                                                     |                                                      |                |
| Timing                                                                           | No.                    | H <sub>2</sub>  | O <sub>2</sub>                               | N <sub>2</sub>  | H <sub>2</sub>                                                                                                     | O <sub>2</sub>                             |                                                          |                                                          |                                                     |                                                      |                |
| Before reaction                                                                  | 1                      | 553641          | 215176                                       | 188804          | 0.0861                                                                                                             | 0.0861                                     | 0.821                                                    | T <sub>a</sub> (°C)                                      | 20.0                                                |                                                      |                |
|                                                                                  | 2                      | 553189          | 215267                                       | 189080          | 0.0863                                                                                                             |                                            |                                                          | 0.822                                                    | P <sub>0</sub> (hPa)                                | 1006.2                                               |                |
|                                                                                  | 3                      | 553785          | 215178                                       | 188804          | 0.0860                                                                                                             |                                            |                                                          | 0.821                                                    | Flow (cc/min)                                       |                                                      |                |
| After reaction                                                                   | 4                      | 552668          | 214805                                       | 188480          | 0.0861                                                                                                             |                                            |                                                          | 0.821                                                    | H <sub>2</sub>                                      | 5.56                                                 |                |
|                                                                                  | 5                      | 553049          | 214757                                       | 188181          | 0.0859                                                                                                             |                                            |                                                          | 0.820                                                    | O <sub>2</sub>                                      | 20.61                                                |                |
|                                                                                  | 6                      | 553316          | 214951                                       | 188572          | 0.0860                                                                                                             |                                            |                                                          | 0.821                                                    | N <sub>2</sub>                                      | 22.03                                                |                |
| Time                                                                             |                        |                 |                                              | GC count        |                                                                                                                    |                                            | t <sub>correct</sub> (min)                               | Outlet flow (sccm)                                       |                                                     | Conversion(%)                                        |                |
| H                                                                                | M                      | S               | min.                                         | H <sub>2</sub>  | O <sub>2</sub>                                                                                                     | N <sub>2</sub>                             |                                                          | H <sub>2</sub>                                           | O <sub>2</sub>                                      | H <sub>2</sub>                                       | O <sub>2</sub> |
| 14                                                                               | 17                     | 0               | 4.0                                          | 212841          | 117416                                                                                                             | 286685                                     | 0.00                                                     | 2.13                                                     | 16.42                                               | 57.70                                                | 11.84          |
| 14                                                                               | 27                     | 4               | 14.1                                         | 258033          | 199461                                                                                                             | 216437                                     | 10.82                                                    | 2.13                                                     | 16.44                                               | 57.59                                                | 11.74          |
| 14                                                                               | 37                     | 6               | 24.1                                         | 259517          | 208235                                                                                                             | 208596                                     | 20.85                                                    | 2.14                                                     | 16.46                                               | 57.48                                                | 11.65          |
| 14                                                                               | 47                     | 10              | 34.2                                         | 259476          | 209259                                                                                                             | 207550                                     | 30.92                                                    | 2.14                                                     | 16.48                                               | 57.37                                                | 11.54          |
| 14                                                                               | 57                     | 12              | 44.2                                         | 260540          | 209863                                                                                                             | 207985                                     | 40.95                                                    | 2.15                                                     | 16.49                                               | 57.29                                                | 11.47          |
| 15                                                                               | 7                      | 16              | 54.3                                         | 260514          | 209528                                                                                                             | 207366                                     | 51.02                                                    | 2.15                                                     | 16.52                                               | 57.16                                                | 11.35          |
| 15                                                                               | 17                     | 18              | 64.3                                         | 261597          | 210165                                                                                                             | 207793                                     | 61.05                                                    | 2.16                                                     | 16.53                                               | 57.07                                                | 11.26          |
| 15                                                                               | 27                     | 22              | 74.4                                         | 262008          | 210485                                                                                                             | 208212                                     | 71.12                                                    | 2.16                                                     | 16.53                                               | 57.09                                                | 11.31          |
| 15                                                                               | 37                     | 24              | 84.4                                         | 262093          | 210128                                                                                                             | 207711                                     | 81.15                                                    | 2.16                                                     | 16.54                                               | 56.98                                                | 11.24          |
| 15                                                                               | 47                     | 28              | 94.5                                         | 262416          | 210065                                                                                                             | 207214                                     | 91.22                                                    | 2.17                                                     | 16.57                                               | 56.82                                                | 11.06          |
| 15                                                                               | 57                     | 30              | 104.5                                        | 262565          | 210045                                                                                                             | 207461                                     | 101.25                                                   | 2.17                                                     | 16.55                                               | 56.85                                                | 11.17          |
| 16                                                                               | 7                      | 34              | 114.6                                        | 263026          | 210160                                                                                                             | 207496                                     | 111.32                                                   | 2.17                                                     | 16.56                                               | 56.78                                                | 11.14          |
| 16                                                                               | 17                     | 36              | 124.6                                        | 263204          | 210150                                                                                                             | 207289                                     | 121.35                                                   | 2.18                                                     | 16.57                                               | 56.70                                                | 11.05          |
| t <sub>correct</sub> (min)                                                       | Partial pressure (kPa) |                 | Rate (mmol L <sup>-1</sup> h <sup>-1</sup> ) |                 | d[H <sub>2</sub> O <sub>2</sub> ]/dt (mmol L <sup>-1</sup> h <sup>-1</sup> )                                       | Σ[H <sub>2</sub> ] (mmol L <sup>-1</sup> ) | [H <sub>2</sub> O <sub>2</sub> ] (mmol L <sup>-1</sup> ) | S <sub>e</sub> (—)                                       | Σ <sub>2</sub> [H <sub>2</sub> O <sub>2</sub> ] (h) | Σ <sub>1</sub> /[H <sub>2</sub> O <sub>2</sub> ] (—) |                |
|                                                                                  | P <sub>H2</sub>        | P <sub>O2</sub> | r <sub>H2</sub>                              | r <sub>O2</sub> |                                                                                                                    |                                            |                                                          |                                                          |                                                     |                                                      |                |
| 0.00                                                                             | 5.36                   | 41.43           | 25.89                                        | 19.70           | 13.51                                                                                                              | 0.00                                       | 0.00                                                     |                                                          | 0.000                                               | 0.000                                                |                |
| 10.82                                                                            | 5.37                   | 41.45           | 25.84                                        | 19.53           | 13.22                                                                                                              | 4.67                                       | 2.41                                                     | 0.52                                                     | 0.090                                               | 1.935                                                |                |
| 20.85                                                                            | 5.38                   | 41.47           | 25.80                                        | 19.37           | 12.95                                                                                                              | 8.98                                       | 4.60                                                     | 0.51                                                     | 0.175                                               | 1.953                                                |                |
| 30.92                                                                            | 5.39                   | 41.50           | 25.75                                        | 19.20           | 12.65                                                                                                              | 13.31                                      | 6.75                                                     | 0.51                                                     | 0.260                                               | 1.972                                                |                |
| 40.95                                                                            | 5.40                   | 41.51           | 25.71                                        | 19.08           | 12.46                                                                                                              | 17.61                                      | 8.85                                                     | 0.50                                                     | 0.346                                               | 1.991                                                |                |
| 51.02                                                                            | 5.41                   | 41.54           | 25.65                                        | 18.88           | 12.10                                                                                                              | 21.92                                      | 10.91                                                    | 0.50                                                     | 0.432                                               | 2.010                                                |                |
| 61.05                                                                            | 5.42                   | 41.56           | 25.61                                        | 18.73           | 11.86                                                                                                              | 26.20                                      | 12.91                                                    | 0.49                                                     | 0.520                                               | 2.030                                                |                |
| 71.12                                                                            | 5.42                   | 41.54           | 25.62                                        | 18.81           | 11.99                                                                                                              | 30.50                                      | 14.91                                                    | 0.49                                                     | 0.606                                               | 2.046                                                |                |
| 81.15                                                                            | 5.43                   | 41.56           | 25.57                                        | 18.70           | 11.84                                                                                                              | 34.78                                      | 16.90                                                    | 0.49                                                     | 0.692                                               | 2.058                                                |                |
| 91.22                                                                            | 5.45                   | 41.60           | 25.50                                        | 18.39           | 11.29                                                                                                              | 39.07                                      | 18.84                                                    | 0.48                                                     | 0.780                                               | 2.073                                                |                |
| 101.25                                                                           | 5.45                   | 41.57           | 25.51                                        | 18.58           | 11.65                                                                                                              | 43.33                                      | 20.76                                                    | 0.48                                                     | 0.868                                               | 2.087                                                |                |
| 111.32                                                                           | 5.46                   | 41.57           | 25.48                                        | 18.53           | 11.57                                                                                                              | 47.61                                      | 22.71                                                    | 0.48                                                     | 0.954                                               | 2.097                                                |                |
| 121.35                                                                           | 5.46                   | 41.59           | 25.45                                        | 18.39           | 11.32                                                                                                              | 51.87                                      | 24.62                                                    | 0.47                                                     | 1.040                                               | 2.106                                                |                |

## H<sub>2</sub>O<sub>2</sub> Synthesis Data Sheet

Entry No. 38 (Exp. G61) Employed in: Fig 6

| Catalyst, Additives                                                              |                        |                 | Reaction conditions                          |                 | Gas feed rate (sccm)                                                                                               |                                            |                                                          |                                                          |                                                     |                                                      |                |
|----------------------------------------------------------------------------------|------------------------|-----------------|----------------------------------------------|-----------------|--------------------------------------------------------------------------------------------------------------------|--------------------------------------------|----------------------------------------------------------|----------------------------------------------------------|-----------------------------------------------------|------------------------------------------------------|----------------|
| Name                                                                             | Conc.                  | (Unit)          | T <sub>0</sub> (°C)                          | 21.5            |                                                                                                                    | H <sub>2</sub>                             | O <sub>2</sub>                                           | N <sub>2</sub>                                           | Sum                                                 |                                                      |                |
| Pd-PVP                                                                           | 8.33                   | (mg/L)          | T (°C)                                       | 30.0            | Set                                                                                                                | 7.50                                       | 20.00                                                    | 20.00                                                    | 47.50                                               |                                                      |                |
| Pt(NH <sub>3</sub> ) <sub>4</sub> (NO <sub>3</sub> ) <sub>2</sub>                | 0.0833                 | (mg-Pt/L)       | P <sub>0</sub> (hPa)                         | 1015.0          | Calibrated                                                                                                         | 7.50                                       | 18.61                                                    | 20.02                                                    | 46.13                                               |                                                      |                |
| H <sub>2</sub> SO <sub>4</sub>                                                   | 0.01                   | (N)             | P (hPa)                                      | 1021.4          | Determination of final [H <sub>2</sub> O <sub>2</sub> ]                                                            | Sample (g)                                 | Absorbance (—)                                           | [H <sub>2</sub> O <sub>2</sub> ] (mmol L <sup>-1</sup> ) |                                                     |                                                      |                |
| NaBr                                                                             | 0.001                  | (N)             | Agitation (rpm)                              | 1200            |                                                                                                                    |                                            |                                                          |                                                          | 1.255                                               | 1.323                                                | 36.24          |
| Comment:<br>Catalyst activation: H <sub>2</sub> gas 20 sccm at 303 K for 40 min. |                        |                 |                                              |                 | Analysis of H <sub>2</sub> O <sub>2</sub> formation selectivity and H <sub>2</sub> O <sub>2</sub> destruction rate |                                            |                                                          | S <sub>f</sub> (—)                                       | 0.5074                                              |                                                      |                |
|                                                                                  |                        |                 |                                              |                 |                                                                                                                    |                                            |                                                          | k <sub>d</sub> [Cat] (h <sup>-1</sup> )                  | 0.0694                                              |                                                      |                |
|                                                                                  |                        |                 |                                              |                 |                                                                                                                    |                                            |                                                          | R <sup>2</sup>                                           | 0.9988                                              |                                                      |                |
| GC calibration                                                                   |                        | GC count        |                                              |                 | Ratio of sensitivity (toward N <sub>2</sub> )                                                                      |                                            | Feed gas measurement                                     |                                                          |                                                     |                                                      |                |
| Timing                                                                           | No.                    | H <sub>2</sub>  | O <sub>2</sub>                               | N <sub>2</sub>  | H <sub>2</sub>                                                                                                     | O <sub>2</sub>                             |                                                          |                                                          |                                                     |                                                      |                |
| Before reaction                                                                  | 1                      | 772151          | 204266                                       | 178725          | 0.0867                                                                                                             | 0.0866                                     | 0.813                                                    | T <sub>a</sub> (°C)                                      | 20.9                                                |                                                      |                |
|                                                                                  | 2                      | 772292          | 204345                                       | 178785          | 0.0867                                                                                                             |                                            |                                                          | 0.813                                                    | P <sub>0</sub> (hPa)                                | 1014.4                                               |                |
|                                                                                  | 3                      | 772855          | 204394                                       | 178745          | 0.0866                                                                                                             |                                            |                                                          | 0.813                                                    | Flow (cc/min)                                       |                                                      |                |
| After reaction                                                                   | 4                      | 772422          | 204179                                       | 178535          | 0.0865                                                                                                             |                                            |                                                          | 0.813                                                    | H <sub>2</sub>                                      | 8.26                                                 |                |
|                                                                                  | 5                      | 771816          | 203967                                       | 178280          | 0.0865                                                                                                             |                                            |                                                          | 0.813                                                    | O <sub>2</sub>                                      | 20.51                                                |                |
|                                                                                  | 6                      | 771589          | 204003                                       | 178366          | 0.0866                                                                                                             |                                            |                                                          | 0.813                                                    | N <sub>2</sub>                                      | 22.06                                                |                |
| Time                                                                             |                        |                 |                                              | GC count        |                                                                                                                    |                                            | t <sub>correct</sub> (min)                               | Outlet flow (sccm)                                       |                                                     | Conversion(%)                                        |                |
| H                                                                                | M                      | S               | min.                                         | H <sub>2</sub>  | O <sub>2</sub>                                                                                                     | N <sub>2</sub>                             |                                                          | H <sub>2</sub>                                           | O <sub>2</sub>                                      | H <sub>2</sub>                                       | O <sub>2</sub> |
| 14                                                                               | 8                      | 52              | 4.0                                          | 306829          | 111928                                                                                                             | 284374                                     | 0.00                                                     | 3.07                                                     | 15.27                                               | 59.10                                                | 17.94          |
| 14                                                                               | 18                     | 54              | 14.0                                         | 369986          | 187512                                                                                                             | 218254                                     | 10.79                                                    | 3.07                                                     | 15.29                                               | 59.04                                                | 17.85          |
| 14                                                                               | 28                     | 58              | 24.1                                         | 372128          | 196149                                                                                                             | 210585                                     | 20.86                                                    | 3.08                                                     | 15.31                                               | 58.98                                                | 17.76          |
| 14                                                                               | 39                     | 0               | 34.1                                         | 371193          | 196743                                                                                                             | 209138                                     | 30.89                                                    | 3.08                                                     | 15.31                                               | 58.96                                                | 17.73          |
| 14                                                                               | 49                     | 4               | 44.2                                         | 371966          | 196962                                                                                                             | 208660                                     | 40.96                                                    | 3.09                                                     | 15.37                                               | 58.78                                                | 17.45          |
| 14                                                                               | 59                     | 6               | 54.2                                         | 371931          | 196989                                                                                                             | 208943                                     | 50.99                                                    | 3.09                                                     | 15.35                                               | 58.84                                                | 17.55          |
| 15                                                                               | 9                      | 10              | 64.3                                         | 371931          | 197171                                                                                                             | 208904                                     | 61.06                                                    | 3.09                                                     | 15.36                                               | 58.83                                                | 17.46          |
| 15                                                                               | 19                     | 12              | 74.3                                         | 371892          | 197171                                                                                                             | 208662                                     | 71.09                                                    | 3.09                                                     | 15.38                                               | 58.78                                                | 17.36          |
| 15                                                                               | 29                     | 16              | 84.4                                         | 372546          | 197321                                                                                                             | 208635                                     | 81.16                                                    | 3.10                                                     | 15.40                                               | 58.71                                                | 17.29          |
| 15                                                                               | 39                     | 18              | 94.4                                         | 372316          | 197396                                                                                                             | 208555                                     | 91.19                                                    | 3.09                                                     | 15.41                                               | 58.72                                                | 17.23          |
| 15                                                                               | 49                     | 22              | 104.5                                        | 373060          | 197559                                                                                                             | 208546                                     | 101.26                                                   | 3.10                                                     | 15.42                                               | 58.63                                                | 17.15          |
| 15                                                                               | 59                     | 24              | 114.5                                        | 372788          | 197628                                                                                                             | 208392                                     | 111.29                                                   | 3.10                                                     | 15.44                                               | 58.63                                                | 17.06          |
| 16                                                                               | 9                      | 28              | 124.6                                        | 373112          | 198083                                                                                                             | 209054                                     | 121.36                                                   | 3.09                                                     | 15.42                                               | 58.73                                                | 17.14          |
| t <sub>correct</sub> (min)                                                       | Partial pressure (kPa) |                 | Rate (mmol L <sup>-1</sup> h <sup>-1</sup> ) |                 | d[H <sub>2</sub> O <sub>2</sub> ]/dt (mmol L <sup>-1</sup> h <sup>-1</sup> )                                       | Σ[H <sub>2</sub> ] (mmol L <sup>-1</sup> ) | [H <sub>2</sub> O <sub>2</sub> ] (mmol L <sup>-1</sup> ) | S <sub>e</sub> (—)                                       | Σ <sub>2</sub> [H <sub>2</sub> O <sub>2</sub> ] (h) | Σ <sub>1</sub> /[H <sub>2</sub> O <sub>2</sub> ] (—) |                |
|                                                                                  | P <sub>H2</sub>        | P <sub>O2</sub> | r <sub>H2</sub>                              | r <sub>O2</sub> |                                                                                                                    |                                            |                                                          |                                                          |                                                     |                                                      |                |
| 0.00                                                                             | 7.82                   | 38.98           | 39.56                                        | 29.82           | 20.08                                                                                                              | 0.00                                       | 0.00                                                     |                                                          | 0.000                                               | 0.000                                                |                |
| 10.79                                                                            | 7.83                   | 39.00           | 39.51                                        | 29.66           | 19.81                                                                                                              | 7.11                                       | 3.59                                                     | 0.50                                                     | 0.090                                               | 1.982                                                |                |
| 20.86                                                                            | 7.84                   | 39.02           | 39.47                                        | 29.51           | 19.55                                                                                                              | 13.73                                      | 6.89                                                     | 0.50                                                     | 0.174                                               | 1.994                                                |                |
| 30.89                                                                            | 7.84                   | 39.03           | 39.46                                        | 29.47           | 19.47                                                                                                              | 20.33                                      | 10.15                                                    | 0.50                                                     | 0.259                                               | 2.003                                                |                |
| 40.96                                                                            | 7.86                   | 39.10           | 39.34                                        | 29.00           | 18.66                                                                                                              | 26.94                                      | 13.35                                                    | 0.50                                                     | 0.344                                               | 2.018                                                |                |
| 50.99                                                                            | 7.86                   | 39.07           | 39.38                                        | 29.17           | 18.96                                                                                                              | 33.53                                      | 16.49                                                    | 0.49                                                     | 0.430                                               | 2.033                                                |                |
| 61.06                                                                            | 7.85                   | 39.10           | 39.37                                        | 29.01           | 18.66                                                                                                              | 40.13                                      | 19.65                                                    | 0.49                                                     | 0.515                                               | 2.042                                                |                |
| 71.09                                                                            | 7.86                   | 39.12           | 39.34                                        | 28.86           | 18.37                                                                                                              | 46.71                                      | 22.74                                                    | 0.49                                                     | 0.601                                               | 2.054                                                |                |
| 81.16                                                                            | 7.87                   | 39.14           | 39.29                                        | 28.73           | 18.17                                                                                                              | 53.31                                      | 25.81                                                    | 0.48                                                     | 0.687                                               | 2.065                                                |                |
| 91.19                                                                            | 7.87                   | 39.16           | 39.30                                        | 28.63           | 17.96                                                                                                              | 59.88                                      | 28.83                                                    | 0.48                                                     | 0.774                                               | 2.077                                                |                |
| 101.26                                                                           | 7.88                   | 39.17           | 39.24                                        | 28.51           | 17.78                                                                                                              | 66.47                                      | 31.83                                                    | 0.48                                                     | 0.861                                               | 2.088                                                |                |
| 111.29                                                                           | 7.87                   | 39.20           | 39.24                                        | 28.36           | 17.48                                                                                                              | 73.03                                      | 34.78                                                    | 0.48                                                     | 0.948                                               | 2.100                                                |                |
| 121.36                                                                           | 7.86                   | 39.18           | 39.31                                        | 28.48           | 17.65                                                                                                              | 79.62                                      | 37.72                                                    | 0.47                                                     | 1.035                                               | 2.111                                                |                |

## H<sub>2</sub>O<sub>2</sub> Synthesis Data Sheet

Entry No. 39 (Exp. G63) Employed in: Fig. 6

| Catalyst, Additives                                                              |                        |                 | Reaction conditions                          |                 | Gas feed rate (sccm)                                                                                               |                                            |                                                          |                                                          |                                                     |                                                      |                |
|----------------------------------------------------------------------------------|------------------------|-----------------|----------------------------------------------|-----------------|--------------------------------------------------------------------------------------------------------------------|--------------------------------------------|----------------------------------------------------------|----------------------------------------------------------|-----------------------------------------------------|------------------------------------------------------|----------------|
| Name                                                                             | Conc.                  | (Unit)          | T <sub>0</sub> (°C)                          | 18.4            |                                                                                                                    | H <sub>2</sub>                             | O <sub>2</sub>                                           | N <sub>2</sub>                                           | Sum                                                 |                                                      |                |
| Pd-PVP                                                                           | 8.33                   | (mg/L)          | T (°C)                                       | 29.9            | Set                                                                                                                | 10.00                                      | 20.00                                                    | 20.00                                                    | 50.00                                               |                                                      |                |
| Pt(NH <sub>3</sub> ) <sub>4</sub> (NO <sub>3</sub> ) <sub>2</sub>                | 0.0833                 | (mg-Pt/L)       | P <sub>0</sub> (hPa)                         | 1011.6          | Calibrated                                                                                                         | 9.99                                       | 18.67                                                    | 20.00                                                    | 48.67                                               |                                                      |                |
| H <sub>2</sub> SO <sub>4</sub>                                                   | 0.01                   | (N)             | P (hPa)                                      | 1018.1          | Determination of final [H <sub>2</sub> O <sub>2</sub> ]                                                            | Sample (g)                                 | Absorbance (—)                                           | [H <sub>2</sub> O <sub>2</sub> ] (mmol L <sup>-1</sup> ) |                                                     |                                                      |                |
| NaBr                                                                             | 0.001                  | (N)             | Agitation (rpm)                              | 1200            |                                                                                                                    |                                            |                                                          |                                                          | 0.895                                               | 1.160                                                | 44.52          |
| Comment:<br>Catalyst activation: H <sub>2</sub> gas 20 sccm at 303 K for 40 min. |                        |                 |                                              |                 | Analysis of H <sub>2</sub> O <sub>2</sub> formation selectivity and H <sub>2</sub> O <sub>2</sub> destruction rate |                                            |                                                          | S <sub>f</sub> (—)                                       | 0.4928                                              |                                                      |                |
|                                                                                  |                        |                 |                                              |                 |                                                                                                                    |                                            |                                                          | k <sub>d</sub> [Cat] (h <sup>-1</sup> )                  | 0.1299                                              |                                                      |                |
|                                                                                  |                        |                 |                                              |                 |                                                                                                                    |                                            |                                                          | R <sup>2</sup>                                           | 0.9991                                              |                                                      |                |
| GC calibration                                                                   |                        | GC count        |                                              |                 | Ratio of sensitivity (toward N <sub>2</sub> )                                                                      |                                            | Feed gas measurement                                     |                                                          |                                                     |                                                      |                |
| Timing                                                                           | No.                    | H <sub>2</sub>  | O <sub>2</sub>                               | N <sub>2</sub>  | H <sub>2</sub>                                                                                                     | O <sub>2</sub>                             |                                                          |                                                          |                                                     |                                                      |                |
| Before reaction                                                                  | 1                      | 961696          | 196254                                       | 171920          | 0.0893                                                                                                             | 0.0882                                     | 0.814                                                    | T <sub>a</sub> (°C)                                      | 18.1                                                |                                                      |                |
|                                                                                  | 2                      | 961283          | 195378                                       | 169985          | 0.0883                                                                                                             |                                            |                                                          | 0.812                                                    | P <sub>0</sub> (hPa)                                | 1012.4                                               |                |
|                                                                                  | 3                      | 962882          | 195331                                       | 170220          | 0.0883                                                                                                             |                                            |                                                          | 0.813                                                    | Flow (cc/min)                                       |                                                      |                |
| After reaction                                                                   | 4                      | 961412          | 194080                                       | 168995          | 0.0878                                                                                                             |                                            |                                                          | 0.813                                                    | H <sub>2</sub>                                      | 10.88                                                |                |
|                                                                                  | 5                      | 960652          | 194002                                       | 169081          | 0.0879                                                                                                             |                                            |                                                          | 0.814                                                    | O <sub>2</sub>                                      | 20.34                                                |                |
|                                                                                  | 6                      | 961406          | 194193                                       | 169342          | 0.0879                                                                                                             |                                            |                                                          | 0.814                                                    | N <sub>2</sub>                                      | 21.79                                                |                |
| Time                                                                             |                        |                 |                                              | GC count        |                                                                                                                    |                                            | t <sub>correct</sub> (min)                               | Outlet flow (sccm)                                       |                                                     | Conversion(%)                                        |                |
| H                                                                                | M                      | S               | min.                                         | H <sub>2</sub>  | O <sub>2</sub>                                                                                                     | N <sub>2</sub>                             |                                                          | H <sub>2</sub>                                           | O <sub>2</sub>                                      | H <sub>2</sub>                                       | O <sub>2</sub> |
| 10                                                                               | 27                     | 58              | 4.0                                          | 407172          | 108181                                                                                                             | 280831                                     | 0.00                                                     | 4.01                                                     | 14.21                                               | 59.89                                                | 23.88          |
| 10                                                                               | 38                     | 0               | 14.0                                         | 488613          | 176196                                                                                                             | 218485                                     | 11.03                                                    | 4.00                                                     | 14.24                                               | 59.91                                                | 23.73          |
| 10                                                                               | 48                     | 4               | 24.1                                         | 481083          | 184228                                                                                                             | 212396                                     | 21.10                                                    | 4.00                                                     | 14.27                                               | 59.94                                                | 23.59          |
| 10                                                                               | 58                     | 6               | 34.1                                         | 478091          | 185296                                                                                                             | 211003                                     | 31.13                                                    | 4.00                                                     | 14.30                                               | 59.96                                                | 23.43          |
| 11                                                                               | 8                      | 10              | 44.2                                         | 477550          | 185431                                                                                                             | 210954                                     | 41.20                                                    | 4.00                                                     | 14.31                                               | 60.00                                                | 23.35          |
| 11                                                                               | 18                     | 12              | 54.2                                         | 477126          | 185829                                                                                                             | 210835                                     | 51.23                                                    | 3.99                                                     | 14.35                                               | 60.01                                                | 23.15          |
| 11                                                                               | 28                     | 14              | 64.3                                         | 476894          | 185863                                                                                                             | 210199                                     | 61.27                                                    | 4.00                                                     | 14.40                                               | 59.91                                                | 22.90          |
| 11                                                                               | 38                     | 18              | 74.3                                         | 476533          | 186229                                                                                                             | 210357                                     | 71.33                                                    | 4.00                                                     | 14.41                                               | 59.97                                                | 22.80          |
| 11                                                                               | 48                     | 20              | 84.4                                         | 476968          | 186342                                                                                                             | 209945                                     | 81.37                                                    | 4.01                                                     | 14.45                                               | 59.85                                                | 22.61          |
| 11                                                                               | 58                     | 24              | 94.4                                         | 476422          | 186535                                                                                                             | 209721                                     | 91.43                                                    | 4.01                                                     | 14.48                                               | 59.86                                                | 22.44          |
| 12                                                                               | 8                      | 26              | 104.5                                        | 476775          | 186679                                                                                                             | 209362                                     | 101.47                                                   | 4.02                                                     | 14.52                                               | 59.76                                                | 22.25          |
| 12                                                                               | 18                     | 30              | 114.5                                        | 478014          | 186877                                                                                                             | 209082                                     | 111.53                                                   | 4.04                                                     | 14.55                                               | 59.60                                                | 22.06          |
| 12                                                                               | 28                     | 32              | 124.6                                        | 478523          | 186960                                                                                                             | 208767                                     | 121.57                                                   | 4.05                                                     | 14.58                                               | 59.49                                                | 21.91          |
| t <sub>correct</sub> (min)                                                       | Partial pressure (kPa) |                 | Rate (mmol L <sup>-1</sup> h <sup>-1</sup> ) |                 | d[H <sub>2</sub> O <sub>2</sub> ]/dt (mmol L <sup>-1</sup> h <sup>-1</sup> )                                       | Σ[H <sub>2</sub> ] (mmol L <sup>-1</sup> ) | [H <sub>2</sub> O <sub>2</sub> ] (mmol L <sup>-1</sup> ) | S <sub>e</sub> (—)                                       | Σ <sub>2</sub> [H <sub>2</sub> O <sub>2</sub> ] (h) | Σ <sub>1</sub> /[H <sub>2</sub> O <sub>2</sub> ] (—) |                |
|                                                                                  | P <sub>H2</sub>        | P <sub>O2</sub> | r <sub>H2</sub>                              | r <sub>O2</sub> |                                                                                                                    |                                            |                                                          |                                                          |                                                     |                                                      |                |
| 0.00                                                                             | 10.23                  | 36.28           | 53.41                                        | 39.82           | 26.23                                                                                                              | 0.00                                       | 0.00                                                     |                                                          | 0.000                                               | 0.000                                                |                |
| 11.03                                                                            | 10.21                  | 36.32           | 53.43                                        | 39.56           | 25.69                                                                                                              | 9.83                                       | 4.77                                                     | 0.49                                                     | 0.092                                               | 2.058                                                |                |
| 21.10                                                                            | 10.20                  | 36.37           | 53.46                                        | 39.33           | 25.20                                                                                                              | 18.79                                      | 9.04                                                     | 0.48                                                     | 0.177                                               | 2.078                                                |                |
| 31.13                                                                            | 10.19                  | 36.42           | 53.47                                        | 39.06           | 24.64                                                                                                              | 27.73                                      | 13.21                                                    | 0.48                                                     | 0.262                                               | 2.099                                                |                |
| 41.20                                                                            | 10.17                  | 36.44           | 53.51                                        | 38.94           | 24.37                                                                                                              | 36.71                                      | 17.32                                                    | 0.47                                                     | 0.348                                               | 2.119                                                |                |
| 51.23                                                                            | 10.16                  | 36.51           | 53.52                                        | 38.59           | 23.66                                                                                                              | 45.66                                      | 21.34                                                    | 0.47                                                     | 0.434                                               | 2.139                                                |                |
| 61.27                                                                            | 10.17                  | 36.57           | 53.43                                        | 38.18           | 22.93                                                                                                              | 54.60                                      | 25.23                                                    | 0.46                                                     | 0.521                                               | 2.164                                                |                |
| 71.33                                                                            | 10.15                  | 36.61           | 53.48                                        | 38.02           | 22.56                                                                                                              | 63.57                                      | 29.05                                                    | 0.46                                                     | 0.609                                               | 2.188                                                |                |
| 81.37                                                                            | 10.17                  | 36.65           | 53.38                                        | 37.69           | 22.00                                                                                                              | 72.50                                      | 32.78                                                    | 0.45                                                     | 0.698                                               | 2.212                                                |                |
| 91.43                                                                            | 10.16                  | 36.70           | 53.38                                        | 37.42           | 21.46                                                                                                              | 81.46                                      | 36.42                                                    | 0.45                                                     | 0.787                                               | 2.236                                                |                |
| 101.47                                                                           | 10.17                  | 36.75           | 53.29                                        | 37.10           | 20.90                                                                                                              | 90.37                                      | 39.96                                                    | 0.44                                                     | 0.877                                               | 2.261                                                |                |
| 111.53                                                                           | 10.20                  | 36.79           | 53.15                                        | 36.79           | 20.42                                                                                                              | 99.30                                      | 43.43                                                    | 0.44                                                     | 0.968                                               | 2.286                                                |                |
| 121.57                                                                           | 10.22                  | 36.83           | 53.06                                        | 36.53           | 20.01                                                                                                              | 108.18                                     | 46.81                                                    | 0.43                                                     | 1.060                                               | 2.311                                                |                |



## H<sub>2</sub>O<sub>2</sub> Synthesis Data Sheet

Entry No. 40 (Exp. G10) Employed in: Fig 6

| Catalyst, Additives                                                              |                        |                 | Reaction conditions                          |                 | Gas feed rate (sccm)                                                                                               |                                            |                                                          |                                                          |                                                     |                                                      |       |
|----------------------------------------------------------------------------------|------------------------|-----------------|----------------------------------------------|-----------------|--------------------------------------------------------------------------------------------------------------------|--------------------------------------------|----------------------------------------------------------|----------------------------------------------------------|-----------------------------------------------------|------------------------------------------------------|-------|
| Name                                                                             | Conc.                  | (Unit)          | T <sub>0</sub> (°C)                          | 29.7            |                                                                                                                    | H <sub>2</sub>                             | O <sub>2</sub>                                           | N <sub>2</sub>                                           | Sum                                                 |                                                      |       |
| Pd-PVP                                                                           | 8.33                   | (mg/L)          | T (°C)                                       | 30.0            | Set                                                                                                                | 10.00                                      | 20.00                                                    | 20.00                                                    | 50.00                                               |                                                      |       |
| Pt(NH <sub>3</sub> ) <sub>4</sub> (NO <sub>3</sub> ) <sub>2</sub>                | 0.0833                 | (mg-Pt/L)       | P <sub>0</sub> (hPa)                         | 1005.2          | Calibrated                                                                                                         | 9.94                                       | 18.39                                                    | 20.22                                                    | 48.55                                               |                                                      |       |
| H <sub>2</sub> SO <sub>4</sub>                                                   | 0.01                   | (N)             | P (hPa)                                      | 1011.7          | Determination of final [H <sub>2</sub> O <sub>2</sub> ]                                                            | Sample (g)                                 | Absorbance (—)                                           | [H <sub>2</sub> O <sub>2</sub> ] (mmol L <sup>-1</sup> ) |                                                     |                                                      |       |
| NaBr                                                                             | 0.001                  | (N)             | Agitation (rpm)                              | 1200            |                                                                                                                    |                                            |                                                          |                                                          | 0.791                                               | 1.263                                                | 54.85 |
| Comment:<br>Catalyst activation: H <sub>2</sub> gas 20 sccm at 303 K for 40 min. |                        |                 |                                              |                 | Analysis of H <sub>2</sub> O <sub>2</sub> formation selectivity and H <sub>2</sub> O <sub>2</sub> destruction rate |                                            |                                                          | S <sub>r</sub> (—)                                       | 0.4865                                              |                                                      |       |
|                                                                                  |                        |                 |                                              |                 |                                                                                                                    |                                            |                                                          | k <sub>d</sub> [Cat] (h <sup>-1</sup> )                  | 0.1410                                              |                                                      |       |
|                                                                                  |                        |                 |                                              |                 |                                                                                                                    |                                            |                                                          | R <sup>2</sup>                                           | 0.9995                                              |                                                      |       |
| GC calibration                                                                   |                        | GC count        |                                              |                 | Ratio of sensitivity (toward N <sub>2</sub> )                                                                      |                                            | Feed gas measurement                                     |                                                          |                                                     |                                                      |       |
| Timing                                                                           | No.                    | H <sub>2</sub>  | O <sub>2</sub>                               | N <sub>2</sub>  | H <sub>2</sub>                                                                                                     | O <sub>2</sub>                             |                                                          |                                                          |                                                     |                                                      |       |
| Before reaction                                                                  | 1                      | 944022          | 188149                                       | 170190          | 0.0887                                                                                                             | 0.823                                      | 0.823                                                    | T <sub>a</sub> (°C)                                      |                                                     |                                                      |       |
|                                                                                  | 2                      | 943908          | 188078                                       | 170094          | 0.0886                                                                                                             | 0.823                                      |                                                          | P <sub>0</sub> (hPa)                                     |                                                     |                                                      |       |
|                                                                                  | 3                      | 944098          | 188148                                       | 170212          | 0.0887                                                                                                             | 0.823                                      |                                                          | Flow (cc/min)                                            |                                                     |                                                      |       |
| After reaction                                                                   | 4                      | 946475          | 188570                                       | 170494          | 0.0886                                                                                                             | 0.823                                      | H <sub>2</sub>                                           |                                                          |                                                     |                                                      |       |
|                                                                                  | 5                      | 946274          | 188524                                       | 170399          | 0.0886                                                                                                             | 0.822                                      | O <sub>2</sub>                                           |                                                          |                                                     |                                                      |       |
|                                                                                  | 6                      | 946515          | 188635                                       | 170510          | 0.0886                                                                                                             | 0.822                                      | N <sub>2</sub>                                           |                                                          |                                                     |                                                      |       |
| Time                                                                             |                        | GC count        |                                              |                 | t <sub>correct</sub> (min)                                                                                         | Outlet flow (sccm)                         |                                                          | Conversion(%)                                            |                                                     |                                                      |       |
| H                                                                                | M                      | S               | min.                                         | H <sub>2</sub>  |                                                                                                                    | O <sub>2</sub>                             | N <sub>2</sub>                                           | H <sub>2</sub>                                           | O <sub>2</sub>                                      |                                                      |       |
| 13                                                                               | 17                     | 26              | 4.0                                          | 366362          | 103930                                                                                                             | 273188                                     | 0.00                                                     | 4.12                                                     | 14.06                                               | 58.55                                                | 23.55 |
| 13                                                                               | 27                     | 28              | 14.0                                         | 428449          | 166734                                                                                                             | 216013                                     | 9.59                                                     | 4.14                                                     | 14.10                                               | 58.42                                                | 23.32 |
| 13                                                                               | 37                     | 32              | 24.1                                         | 441968          | 173633                                                                                                             | 209294                                     | 19.66                                                    | 4.15                                                     | 14.15                                               | 58.29                                                | 23.08 |
| 13                                                                               | 47                     | 34              | 34.1                                         | 477267          | 175374                                                                                                             | 205590                                     | 29.69                                                    | 4.16                                                     | 14.19                                               | 58.17                                                | 22.86 |
| 13                                                                               | 57                     | 36              | 44.2                                         | 478352          | 175640                                                                                                             | 205109                                     | 39.72                                                    | 4.18                                                     | 14.24                                               | 57.98                                                | 22.57 |
| 14                                                                               | 7                      | 40              | 54.2                                         | 479114          | 176002                                                                                                             | 205054                                     | 49.79                                                    | 4.19                                                     | 14.27                                               | 57.90                                                | 22.39 |
| 14                                                                               | 17                     | 42              | 64.3                                         | 479245          | 176192                                                                                                             | 204922                                     | 59.82                                                    | 4.19                                                     | 14.30                                               | 57.86                                                | 22.25 |
| 14                                                                               | 27                     | 46              | 74.3                                         | 479356          | 176411                                                                                                             | 204661                                     | 69.89                                                    | 4.20                                                     | 14.33                                               | 57.80                                                | 22.06 |
| 14                                                                               | 37                     | 48              | 84.4                                         | 479853          | 176608                                                                                                             | 204494                                     | 79.92                                                    | 4.20                                                     | 14.36                                               | 57.72                                                | 21.91 |
| 14                                                                               | 47                     | 52              | 94.4                                         | 480869          | 176843                                                                                                             | 204209                                     | 89.99                                                    | 4.22                                                     | 14.40                                               | 57.57                                                | 21.69 |
| 14                                                                               | 57                     | 54              | 104.5                                        | 481919          | 177445                                                                                                             | 204584                                     | 100.02                                                   | 4.22                                                     | 14.42                                               | 57.55                                                | 21.57 |
| 15                                                                               | 7                      | 58              | 114.5                                        | 482702          | 177666                                                                                                             | 204368                                     | 110.09                                                   | 4.23                                                     | 14.46                                               | 57.44                                                | 21.39 |
| 15                                                                               | 18                     | 0               | 124.6                                        | 482846          | 177675                                                                                                             | 203828                                     | 120.12                                                   | 4.24                                                     | 14.50                                               | 57.32                                                | 21.18 |
| 15                                                                               | 28                     | 4               | 134.6                                        | 483880          | 178122                                                                                                             | 204078                                     | 130.19                                                   | 4.25                                                     | 14.52                                               | 57.28                                                | 21.08 |
| 15                                                                               | 38                     | 6               | 144.7                                        | 484144          | 178236                                                                                                             | 203664                                     | 140.22                                                   | 4.26                                                     | 14.55                                               | 57.17                                                | 20.86 |
| 15                                                                               | 48                     | 10              | 154.7                                        | 484494          | 178313                                                                                                             | 203409                                     | 150.29                                                   | 4.27                                                     | 14.58                                               | 57.08                                                | 20.73 |
| t <sub>correct</sub> (min)                                                       | Partial pressure (kPa) |                 | Rate (mmol L <sup>-1</sup> h <sup>-1</sup> ) |                 | d[H <sub>2</sub> O <sub>2</sub> ]/dt (mmol L <sup>-1</sup> h <sup>-1</sup> )                                       | Σ[H <sub>2</sub> ] (mmol L <sup>-1</sup> ) | [H <sub>2</sub> O <sub>2</sub> ] (mmol L <sup>-1</sup> ) | S <sub>e</sub> (—)                                       | Σ <sub>2</sub> [H <sub>2</sub> O <sub>2</sub> ] (h) | Σ <sub>1</sub> /[H <sub>2</sub> O <sub>2</sub> ] (—) |       |
|                                                                                  | P <sub>H2</sub>        | P <sub>O2</sub> | r <sub>H2</sub>                              | r <sub>O2</sub> |                                                                                                                    |                                            |                                                          |                                                          |                                                     |                                                      |       |
| 0.00                                                                             | 10.40                  | 35.49           | 51.99                                        | 38.67           | 25.34                                                                                                              | 0.00                                       | 0.00                                                     |                                                          | 0.000                                               | 0.000                                                |       |
| 9.59                                                                             | 10.42                  | 35.54           | 51.87                                        | 38.29           | 24.71                                                                                                              | 8.30                                       | 4.00                                                     | 0.48                                                     | 0.080                                               | 2.075                                                |       |
| 19.66                                                                            | 10.44                  | 35.60           | 51.75                                        | 37.90           | 24.05                                                                                                              | 16.99                                      | 8.09                                                     | 0.48                                                     | 0.165                                               | 2.100                                                |       |
| 29.69                                                                            | 10.46                  | 35.66           | 51.65                                        | 37.55           | 23.44                                                                                                              | 25.64                                      | 12.06                                                    | 0.47                                                     | 0.250                                               | 2.126                                                |       |
| 39.72                                                                            | 10.48                  | 35.73           | 51.48                                        | 37.06           | 22.63                                                                                                              | 34.26                                      | 15.91                                                    | 0.46                                                     | 0.337                                               | 2.153                                                |       |
| 49.79                                                                            | 10.49                  | 35.77           | 51.41                                        | 36.76           | 22.11                                                                                                              | 42.89                                      | 19.67                                                    | 0.46                                                     | 0.424                                               | 2.181                                                |       |
| 59.82                                                                            | 10.49                  | 35.81           | 51.38                                        | 36.54           | 21.70                                                                                                              | 51.49                                      | 23.33                                                    | 0.45                                                     | 0.512                                               | 2.207                                                |       |
| 69.89                                                                            | 10.50                  | 35.86           | 51.32                                        | 36.22           | 21.12                                                                                                              | 60.10                                      | 26.92                                                    | 0.45                                                     | 0.600                                               | 2.232                                                |       |
| 79.92                                                                            | 10.51                  | 35.89           | 51.25                                        | 35.97           | 20.69                                                                                                              | 68.68                                      | 30.42                                                    | 0.44                                                     | 0.689                                               | 2.258                                                |       |
| 89.99                                                                            | 10.53                  | 35.94           | 51.12                                        | 35.62           | 20.12                                                                                                              | 77.27                                      | 33.84                                                    | 0.44                                                     | 0.778                                               | 2.283                                                |       |
| 100.02                                                                           | 10.53                  | 35.98           | 51.11                                        | 35.42           | 19.73                                                                                                              | 85.81                                      | 37.17                                                    | 0.43                                                     | 0.868                                               | 2.308                                                |       |
| 110.09                                                                           | 10.54                  | 36.02           | 51.00                                        | 35.12           | 19.24                                                                                                              | 94.38                                      | 40.44                                                    | 0.43                                                     | 0.959                                               | 2.334                                                |       |
| 120.12                                                                           | 10.56                  | 36.07           | 50.89                                        | 34.77           | 18.66                                                                                                              | 102.90                                     | 43.61                                                    | 0.42                                                     | 1.051                                               | 2.359                                                |       |
| 130.19                                                                           | 10.57                  | 36.09           | 50.86                                        | 34.61           | 18.36                                                                                                              | 111.43                                     | 46.72                                                    | 0.42                                                     | 1.143                                               | 2.385                                                |       |
| 140.22                                                                           | 10.58                  | 36.14           | 50.76                                        | 34.26           | 17.76                                                                                                              | 119.93                                     | 49.74                                                    | 0.41                                                     | 1.236                                               | 2.411                                                |       |
| 150.29                                                                           | 10.59                  | 36.18           | 50.69                                        | 34.04           | 17.40                                                                                                              | 128.44                                     | 52.69                                                    | 0.41                                                     | 1.330                                               | 2.438                                                |       |

## H<sub>2</sub>O<sub>2</sub> Synthesis Data Sheet

Entry No. 41 (Exp. Y43) Employed in: Fig 6

| Catalyst, Additives                                                              |                        |                 | Reaction conditions                          |                 | Gas feed rate (sccm)                                                                                               |                                            |                                                          |                                                          |                                                     |                                                      |                |
|----------------------------------------------------------------------------------|------------------------|-----------------|----------------------------------------------|-----------------|--------------------------------------------------------------------------------------------------------------------|--------------------------------------------|----------------------------------------------------------|----------------------------------------------------------|-----------------------------------------------------|------------------------------------------------------|----------------|
| Name                                                                             | Conc.                  | (Unit)          | T <sub>0</sub> (°C)                          | 25.4            |                                                                                                                    | H <sub>2</sub>                             | O <sub>2</sub>                                           | N <sub>2</sub>                                           | Sum                                                 |                                                      |                |
| Pd-PVP                                                                           | 8.33                   | (mg/L)          | T (°C)                                       | 30.2            | Set                                                                                                                | 14.60                                      | 20.00                                                    | 20.00                                                    | 54.60                                               |                                                      |                |
| Pt(NH <sub>3</sub> ) <sub>4</sub> (NO <sub>3</sub> ) <sub>2</sub>                | 0.0833                 | (mg-Pt/L)       | P <sub>0</sub> (hPa)                         | 1000.0          | Calibrated                                                                                                         | 14.62                                      | 18.23                                                    | 20.43                                                    | 53.29                                               |                                                      |                |
| H <sub>2</sub> SO <sub>4</sub>                                                   | 0.01                   | (N)             | P (hPa)                                      | 1006.9          | Determination of final [H <sub>2</sub> O <sub>2</sub> ]                                                            | Sample (g)                                 | Absorbance (—)                                           | [H <sub>2</sub> O <sub>2</sub> ] (mmol L <sup>-1</sup> ) |                                                     |                                                      |                |
| NaBr                                                                             | 0.001                  | (N)             | Agitation (rpm)                              | 1200            |                                                                                                                    |                                            |                                                          |                                                          | 0.543                                               | 0.826                                                | 52.23          |
| Comment:<br>Catalyst activation: H <sub>2</sub> gas 20 sccm at 303 K for 40 min. |                        |                 |                                              |                 | Analysis of H <sub>2</sub> O <sub>2</sub> formation selectivity and H <sub>2</sub> O <sub>2</sub> destruction rate |                                            |                                                          | S <sub>f</sub> (—)                                       | 0.6605                                              |                                                      |                |
|                                                                                  |                        |                 |                                              |                 |                                                                                                                    |                                            |                                                          | k <sub>a</sub> [Cat] (h <sup>-1</sup> )                  | 0.5781                                              |                                                      |                |
|                                                                                  |                        |                 |                                              |                 |                                                                                                                    |                                            |                                                          | R <sup>2</sup>                                           | 0.9989                                              |                                                      |                |
| GC calibration                                                                   |                        | GC count        |                                              |                 | Ratio of sensitivity (toward N <sub>2</sub> )                                                                      |                                            | Feed gas measurement                                     |                                                          |                                                     |                                                      |                |
| Timing                                                                           | No.                    | H <sub>2</sub>  | O <sub>2</sub>                               | N <sub>2</sub>  | H <sub>2</sub>                                                                                                     | O <sub>2</sub>                             |                                                          |                                                          |                                                     |                                                      |                |
| Before reaction                                                                  | 1                      | 1286106         | 178221                                       | 159777          | 0.0889                                                                                                             | 0.0887                                     | 0.799                                                    | T <sub>a</sub> (°C)                                      | 25.3                                                |                                                      |                |
|                                                                                  | 2                      | 1286479         | 178239                                       | 159732          | 0.0889                                                                                                             |                                            |                                                          | 0.800                                                    | P <sub>0</sub> (hPa)                                | 999.8                                                |                |
|                                                                                  | 3                      | 1286237         | 178178                                       | 159678          | 0.0889                                                                                                             |                                            |                                                          | 0.800                                                    | Flow (cc/min)                                       |                                                      |                |
| After reaction                                                                   | 4                      | 1287723         | 177788                                       | 159235          | 0.0885                                                                                                             |                                            |                                                          | 0.799                                                    | H <sub>2</sub>                                      | 16.73                                                |                |
|                                                                                  | 5                      | 1287333         | 177923                                       | 159205          | 0.0885                                                                                                             |                                            |                                                          | 0.799                                                    | O <sub>2</sub>                                      | 20.86                                                |                |
|                                                                                  | 6                      | 1287671         | 177903                                       | 159170          | 0.0885                                                                                                             |                                            |                                                          | 0.799                                                    | N <sub>2</sub>                                      | 23.37                                                |                |
| Time                                                                             |                        |                 |                                              | GC count        |                                                                                                                    |                                            | t <sub>correct</sub> (min)                               | Outlet flow (sccm)                                       |                                                     | Conversion(%)                                        |                |
| H                                                                                | M                      | S               | min.                                         | H <sub>2</sub>  | O <sub>2</sub>                                                                                                     | N <sub>2</sub>                             |                                                          | H <sub>2</sub>                                           | O <sub>2</sub>                                      | H <sub>2</sub>                                       | O <sub>2</sub> |
| 19                                                                               | 16                     | 2               | 4.0                                          | 664422          | 103865                                                                                                             | 264291                                     | 0.00                                                     | 7.89                                                     | 12.65                                               | 46.07                                                | 30.65          |
| 19                                                                               | 26                     | 6               | 14.1                                         | 859463          | 152041                                                                                                             | 205979                                     | 10.31                                                    | 7.77                                                     | 12.74                                               | 46.90                                                | 30.14          |
| 19                                                                               | 36                     | 8               | 24.1                                         | 851717          | 157646                                                                                                             | 202536                                     | 20.34                                                    | 7.65                                                     | 12.83                                               | 47.70                                                | 29.64          |
| 19                                                                               | 46                     | 12              | 34.2                                         | 839750          | 159774                                                                                                             | 202058                                     | 30.41                                                    | 7.53                                                     | 12.91                                               | 48.50                                                | 29.18          |
| 19                                                                               | 56                     | 14              | 44.2                                         | 826356          | 161188                                                                                                             | 202106                                     | 40.44                                                    | 7.41                                                     | 13.03                                               | 49.34                                                | 28.57          |
| 20                                                                               | 6                      | 18              | 54.3                                         | 814341          | 162184                                                                                                             | 202267                                     | 50.51                                                    | 7.30                                                     | 13.10                                               | 50.11                                                | 28.18          |
| 20                                                                               | 16                     | 20              | 64.3                                         | 804822          | 163117                                                                                                             | 202429                                     | 60.54                                                    | 7.20                                                     | 13.16                                               | 50.73                                                | 27.83          |
| 20                                                                               | 26                     | 24              | 74.4                                         | 796872          | 163694                                                                                                             | 202461                                     | 70.61                                                    | 7.13                                                     | 13.21                                               | 51.23                                                | 27.58          |
| 20                                                                               | 36                     | 26              | 84.4                                         | 791934          | 164354                                                                                                             | 202504                                     | 80.64                                                    | 7.09                                                     | 13.26                                               | 51.54                                                | 27.31          |
| 20                                                                               | 46                     | 30              | 94.5                                         | 787470          | 164868                                                                                                             | 202380                                     | 90.71                                                    | 7.05                                                     | 13.31                                               | 51.78                                                | 27.03          |
| 20                                                                               | 56                     | 32              | 104.5                                        | 784738          | 165778                                                                                                             | 203294                                     | 100.74                                                   | 7.00                                                     | 13.32                                               | 52.17                                                | 26.96          |
| 21                                                                               | 6                      | 36              | 114.6                                        | 779530          | 165523                                                                                                             | 202195                                     | 110.81                                                   | 6.99                                                     | 13.37                                               | 52.23                                                | 26.68          |
| 21                                                                               | 16                     | 38              | 124.6                                        | 777330          | 166097                                                                                                             | 202477                                     | 120.84                                                   | 6.96                                                     | 13.40                                               | 52.43                                                | 26.53          |
| t <sub>correct</sub> (min)                                                       | Partial pressure (kPa) |                 | Rate (mmol L <sup>-1</sup> h <sup>-1</sup> ) |                 | d[H <sub>2</sub> O <sub>2</sub> ]/dt (mmol L <sup>-1</sup> h <sup>-1</sup> )                                       | Σ[H <sub>2</sub> ] (mmol L <sup>-1</sup> ) | [H <sub>2</sub> O <sub>2</sub> ] (mmol L <sup>-1</sup> ) | S <sub>e</sub> (—)                                       | Σ <sub>2</sub> [H <sub>2</sub> O <sub>2</sub> ] (h) | Σ <sub>1</sub> /[H <sub>2</sub> O <sub>2</sub> ] (—) |                |
| 0.00                                                                             | P <sub>H2</sub>        | P <sub>O2</sub> | r <sub>H2</sub>                              | r <sub>O2</sub> |                                                                                                                    |                                            |                                                          |                                                          |                                                     |                                                      |                |
| 0.00                                                                             | 18.57                  | 29.78           | 60.15                                        | 49.90           | 39.64                                                                                                              | 0.00                                       | 0.00                                                     |                                                          | 0.000                                               | 0.000                                                |                |
| 10.31                                                                            | 18.30                  | 30.02           | 61.24                                        | 49.06           | 36.89                                                                                                              | 10.43                                      | 6.58                                                     | 0.63                                                     | 0.086                                               | 1.586                                                |                |
| 20.34                                                                            | 18.03                  | 30.25           | 62.29                                        | 48.25           | 34.22                                                                                                              | 20.76                                      | 12.52                                                    | 0.60                                                     | 0.173                                               | 1.658                                                |                |
| 30.41                                                                            | 17.77                  | 30.47           | 63.33                                        | 47.50           | 31.67                                                                                                              | 31.30                                      | 18.05                                                    | 0.58                                                     | 0.262                                               | 1.734                                                |                |
| 40.44                                                                            | 17.49                  | 30.74           | 64.42                                        | 46.51           | 28.60                                                                                                              | 41.98                                      | 23.09                                                    | 0.55                                                     | 0.354                                               | 1.818                                                |                |
| 50.51                                                                            | 17.24                  | 30.94           | 65.43                                        | 45.88           | 26.33                                                                                                              | 52.87                                      | 27.70                                                    | 0.52                                                     | 0.449                                               | 1.909                                                |                |
| 60.54                                                                            | 17.03                  | 31.11           | 66.25                                        | 45.31           | 24.36                                                                                                              | 63.88                                      | 31.94                                                    | 0.50                                                     | 0.545                                               | 2.000                                                |                |
| 70.61                                                                            | 16.87                  | 31.24           | 66.89                                        | 44.91           | 22.93                                                                                                              | 75.05                                      | 35.90                                                    | 0.48                                                     | 0.643                                               | 2.090                                                |                |
| 80.64                                                                            | 16.76                  | 31.36           | 67.30                                        | 44.46           | 21.62                                                                                                              | 86.27                                      | 39.63                                                    | 0.46                                                     | 0.742                                               | 2.177                                                |                |
| 90.71                                                                            | 16.67                  | 31.46           | 67.62                                        | 44.02           | 20.41                                                                                                              | 97.59                                      | 43.15                                                    | 0.44                                                     | 0.843                                               | 2.261                                                |                |
| 100.74                                                                           | 16.56                  | 31.53           | 68.12                                        | 43.90           | 19.68                                                                                                              | 108.94                                     | 46.50                                                    | 0.43                                                     | 0.943                                               | 2.343                                                |                |
| 110.81                                                                           | 16.52                  | 31.62           | 68.20                                        | 43.44           | 18.67                                                                                                              | 120.37                                     | 49.72                                                    | 0.41                                                     | 1.044                                               | 2.421                                                |                |
| 120.84                                                                           | 16.45                  | 31.68           | 68.46                                        | 43.19           | 17.92                                                                                                              | 131.80                                     | 52.78                                                    | 0.40                                                     | 1.146                                               | 2.497                                                |                |

## H<sub>2</sub>O<sub>2</sub> Synthesis Data Sheet

Entry No. 42 (Exp. G58) Employed in: Fig 6

| Catalyst, Additives                                                              |                        |                 | Reaction conditions                          |                 | Gas feed rate (sccm)                                                                                               |                                            |                                                          |                                                          |                                                     |                                                      |                |
|----------------------------------------------------------------------------------|------------------------|-----------------|----------------------------------------------|-----------------|--------------------------------------------------------------------------------------------------------------------|--------------------------------------------|----------------------------------------------------------|----------------------------------------------------------|-----------------------------------------------------|------------------------------------------------------|----------------|
| Name                                                                             | Conc.                  | (Unit)          | T <sub>0</sub> (°C)                          | 18.4            |                                                                                                                    | H <sub>2</sub>                             | O <sub>2</sub>                                           | N <sub>2</sub>                                           | Sum                                                 |                                                      |                |
| Pd-PVP                                                                           | 8.33                   | (mg/L)          | T (°C)                                       | 30.1            | Set                                                                                                                | 15.00                                      | 25.00                                                    | 15.00                                                    | 55.00                                               |                                                      |                |
| Pt(NH <sub>3</sub> ) <sub>4</sub> (NO <sub>3</sub> ) <sub>2</sub>                | 0.0833                 | (mg-Pt/L)       | P <sub>0</sub> (hPa)                         | 1007.2          | Calibrated                                                                                                         | 15.00                                      | 23.31                                                    | 14.96                                                    | 53.27                                               |                                                      |                |
| H <sub>2</sub> SO <sub>4</sub>                                                   | 0.01                   | (N)             | P (hPa)                                      | 1013.7          | Determination of final [H <sub>2</sub> O <sub>2</sub> ]                                                            | Sample (g)                                 | Absorbance (—)                                           | [H <sub>2</sub> O <sub>2</sub> ] (mmol L <sup>-1</sup> ) |                                                     |                                                      |                |
| NaBr                                                                             | 0.001                  | (N)             | Agitation (rpm)                              | 1200            |                                                                                                                    |                                            |                                                          |                                                          | 1.123                                               | 2.164                                                | 66.28          |
| Comment:<br>Catalyst activation: H <sub>2</sub> gas 20 sccm at 303 K for 40 min. |                        |                 |                                              |                 | Analysis of H <sub>2</sub> O <sub>2</sub> formation selectivity and H <sub>2</sub> O <sub>2</sub> destruction rate |                                            |                                                          | S <sub>f</sub> (—)                                       | 0.7555                                              |                                                      |                |
|                                                                                  |                        |                 |                                              |                 |                                                                                                                    |                                            |                                                          | k <sub>d</sub> [Cat] (h <sup>-1</sup> )                  | 0.5139                                              |                                                      |                |
|                                                                                  |                        |                 |                                              |                 |                                                                                                                    |                                            |                                                          | R <sup>2</sup>                                           | 0.9984                                              |                                                      |                |
| GC calibration                                                                   |                        | GC count        |                                              |                 | Ratio of sensitivity (toward N <sub>2</sub> )                                                                      |                                            | Feed gas measurement                                     |                                                          |                                                     |                                                      |                |
| Timing                                                                           | No.                    | H <sub>2</sub>  | O <sub>2</sub>                               | N <sub>2</sub>  | H <sub>2</sub>                                                                                                     | O <sub>2</sub>                             |                                                          |                                                          |                                                     |                                                      |                |
| Before reaction                                                                  | 1                      | 1283658         | 223122                                       | 117282          | 0.0916                                                                                                             | 0.0914                                     | 0.820                                                    | T <sub>a</sub> (°C)                                      | 18.0                                                |                                                      |                |
|                                                                                  | 2                      | 1284250         | 222870                                       | 117331          | 0.0916                                                                                                             |                                            |                                                          | 0.820                                                    | P <sub>0</sub> (hPa)                                | 1008.6                                               |                |
|                                                                                  | 3                      | 1284031         | 222633                                       | 117336          | 0.0916                                                                                                             |                                            |                                                          | 0.821                                                    | Flow (cc/min)                                       |                                                      |                |
| After reaction                                                                   | 4                      | 1284433         | 221849                                       | 116867          | 0.0912                                                                                                             |                                            |                                                          | 0.821                                                    | H <sub>2</sub>                                      | 16.39                                                |                |
|                                                                                  | 5                      | 1284350         | 221871                                       | 116835          | 0.0912                                                                                                             |                                            |                                                          | 0.821                                                    | O <sub>2</sub>                                      | 25.48                                                |                |
|                                                                                  | 6                      | 1284427         | 222009                                       | 116806          | 0.0912                                                                                                             |                                            |                                                          | 0.820                                                    | N <sub>2</sub>                                      | 16.35                                                |                |
| Time                                                                             |                        |                 |                                              | GC count        |                                                                                                                    |                                            | t <sub>correct</sub> (min)                               | Outlet flow (sccm)                                       |                                                     | Conversion(%)                                        |                |
| H                                                                                | M                      | S               | min.                                         | H <sub>2</sub>  | O <sub>2</sub>                                                                                                     | N <sub>2</sub>                             |                                                          | H <sub>2</sub>                                           | O <sub>2</sub>                                      | H <sub>2</sub>                                       | O <sub>2</sub> |
| 10                                                                               | 13                     | 14              | 4.0                                          | 624114          | 130722                                                                                                             | 242683                                     | 0.00                                                     | 8.07                                                     | 17.28                                               | 46.18                                                | 25.87          |
| 10                                                                               | 23                     | 18              | 14.1                                         | 859212          | 206097                                                                                                             | 160645                                     | 9.81                                                     | 7.95                                                     | 17.35                                               | 46.98                                                | 25.58          |
| 10                                                                               | 33                     | 20              | 24.1                                         | 863558          | 214637                                                                                                             | 152858                                     | 19.85                                                    | 7.83                                                     | 17.42                                               | 47.80                                                | 25.28          |
| 10                                                                               | 43                     | 24              | 34.2                                         | 857037          | 216840                                                                                                             | 152303                                     | 29.91                                                    | 7.69                                                     | 17.47                                               | 48.70                                                | 25.05          |
| 10                                                                               | 53                     | 26              | 44.2                                         | 845974          | 217873                                                                                                             | 151994                                     | 39.95                                                    | 7.61                                                     | 17.59                                               | 49.26                                                | 24.54          |
| 11                                                                               | 3                      | 30              | 54.3                                         | 831698          | 219043                                                                                                             | 152632                                     | 50.01                                                    | 7.45                                                     | 17.61                                               | 50.32                                                | 24.45          |
| 11                                                                               | 13                     | 32              | 64.3                                         | 818378          | 219985                                                                                                             | 152969                                     | 60.05                                                    | 7.31                                                     | 17.65                                               | 51.23                                                | 24.29          |
| 11                                                                               | 23                     | 36              | 74.4                                         | 804945          | 220963                                                                                                             | 153389                                     | 70.11                                                    | 7.17                                                     | 17.68                                               | 52.16                                                | 24.16          |
| 11                                                                               | 33                     | 38              | 84.4                                         | 736412          | 222577                                                                                                             | 157597                                     | 80.15                                                    | 6.39                                                     | 17.33                                               | 57.40                                                | 25.65          |
| 11                                                                               | 43                     | 42              | 94.5                                         | 708231          | 223469                                                                                                             | 159534                                     | 90.21                                                    | 6.07                                                     | 17.19                                               | 59.53                                                | 26.26          |
| 11                                                                               | 53                     | 44              | 104.5                                        | 714693          | 223972                                                                                                             | 159240                                     | 100.25                                                   | 6.14                                                     | 17.26                                               | 59.08                                                | 25.96          |
| 12                                                                               | 3                      | 48              | 114.6                                        | 718019          | 224009                                                                                                             | 158060                                     | 110.31                                                   | 6.21                                                     | 17.39                                               | 58.59                                                | 25.39          |
| 12                                                                               | 13                     | 50              | 124.6                                        | 721377          | 223909                                                                                                             | 157333                                     | 120.35                                                   | 6.27                                                     | 17.47                                               | 58.20                                                | 25.08          |
| t <sub>correct</sub> (min)                                                       | Partial pressure (kPa) |                 | Rate (mmol L <sup>-1</sup> h <sup>-1</sup> ) |                 | d[H <sub>2</sub> O <sub>2</sub> ]/dt (mmol L <sup>-1</sup> h <sup>-1</sup> )                                       | Σ[H <sub>2</sub> ] (mmol L <sup>-1</sup> ) | [H <sub>2</sub> O <sub>2</sub> ] (mmol L <sup>-1</sup> ) | S <sub>e</sub> (—)                                       | Σ <sub>2</sub> [H <sub>2</sub> O <sub>2</sub> ] (h) | Σ <sub>1</sub> /[H <sub>2</sub> O <sub>2</sub> ] (—) |                |
|                                                                                  | P <sub>H2</sub>        | P <sub>O2</sub> | r <sub>H2</sub>                              | r <sub>O2</sub> |                                                                                                                    |                                            |                                                          |                                                          |                                                     |                                                      |                |
| 0.00                                                                             | 19.45                  | 41.65           | 61.83                                        | 53.86           | 45.89                                                                                                              | 0.00                                       | 0.00                                                     |                                                          | 0.000                                               | 0.000                                                |                |
| 9.81                                                                             | 19.19                  | 41.87           | 62.90                                        | 53.25           | 43.59                                                                                                              | 10.20                                      | 7.32                                                     | 0.72                                                     | 0.082                                               | 1.394                                                |                |
| 19.85                                                                            | 18.92                  | 42.09           | 64.00                                        | 52.62           | 41.24                                                                                                              | 20.81                                      | 14.41                                                    | 0.69                                                     | 0.168                                               | 1.444                                                |                |
| 29.91                                                                            | 18.63                  | 42.31           | 65.21                                        | 52.14           | 39.07                                                                                                              | 31.65                                      | 21.15                                                    | 0.67                                                     | 0.255                                               | 1.497                                                |                |
| 39.95                                                                            | 18.41                  | 42.56           | 65.95                                        | 51.08           | 36.20                                                                                                              | 42.62                                      | 27.44                                                    | 0.64                                                     | 0.345                                               | 1.553                                                |                |
| 50.01                                                                            | 18.08                  | 42.75           | 67.38                                        | 50.90           | 34.41                                                                                                              | 53.80                                      | 33.37                                                    | 0.62                                                     | 0.436                                               | 1.613                                                |                |
| 60.05                                                                            | 17.80                  | 42.95           | 68.59                                        | 50.57           | 32.54                                                                                                              | 65.17                                      | 38.96                                                    | 0.60                                                     | 0.529                                               | 1.673                                                |                |
| 70.11                                                                            | 17.51                  | 43.14           | 69.84                                        | 50.30           | 30.76                                                                                                              | 76.78                                      | 44.27                                                    | 0.58                                                     | 0.623                                               | 1.734                                                |                |
| 80.15                                                                            | 16.04                  | 43.52           | 76.86                                        | 53.39           | 29.93                                                                                                              | 89.05                                      | 49.35                                                    | 0.55                                                     | 0.718                                               | 1.804                                                |                |
| 90.21                                                                            | 15.42                  | 43.68           | 79.71                                        | 54.66           | 29.61                                                                                                              | 102.18                                     | 54.34                                                    | 0.53                                                     | 0.812                                               | 1.880                                                |                |
| 100.25                                                                           | 15.54                  | 43.71           | 79.11                                        | 54.03           | 28.95                                                                                                              | 115.46                                     | 59.24                                                    | 0.51                                                     | 0.905                                               | 1.949                                                |                |
| 110.31                                                                           | 15.64                  | 43.81           | 78.44                                        | 52.85           | 27.26                                                                                                              | 128.68                                     | 63.95                                                    | 0.50                                                     | 1.000                                               | 2.012                                                |                |
| 120.35                                                                           | 15.73                  | 43.84           | 77.93                                        | 52.20           | 26.48                                                                                                              | 141.75                                     | 68.45                                                    | 0.48                                                     | 1.096                                               | 2.071                                                |                |

## H<sub>2</sub>O<sub>2</sub> Synthesis Data Sheet

Entry No. 43 (Exp. G60) Employed in: Fig. 6

| Catalyst, Additives                                                              |                        |                 | Reaction conditions                          |                 | Gas feed rate (sccm)                                                                                               |                                            |                                                          |                                                          |                                                     |                                                      |                |
|----------------------------------------------------------------------------------|------------------------|-----------------|----------------------------------------------|-----------------|--------------------------------------------------------------------------------------------------------------------|--------------------------------------------|----------------------------------------------------------|----------------------------------------------------------|-----------------------------------------------------|------------------------------------------------------|----------------|
| Name                                                                             | Conc.                  | (Unit)          | T <sub>0</sub> (°C)                          | 20.4            |                                                                                                                    | H <sub>2</sub>                             | O <sub>2</sub>                                           | N <sub>2</sub>                                           | Sum                                                 |                                                      |                |
| Pd-PVP                                                                           | 8.33                   | (mg/L)          | T (°C)                                       | 30.1            | Set                                                                                                                | 17.50                                      | 25.00                                                    | 15.00                                                    | 57.50                                               |                                                      |                |
| Pt(NH <sub>3</sub> ) <sub>4</sub> (NO <sub>3</sub> ) <sub>2</sub>                | 0.0833                 | (mg-Pt/L)       | P <sub>0</sub> (hPa)                         | 1015.0          | Calibrated                                                                                                         | 17.39                                      | 23.21                                                    | 15.03                                                    | 55.63                                               |                                                      |                |
| H <sub>2</sub> SO <sub>4</sub>                                                   | 0.01                   | (N)             | P (hPa)                                      | 1022.0          | Determination of final [H <sub>2</sub> O <sub>2</sub> ]                                                            | Sample (g)                                 | Absorbance (—)                                           | [H <sub>2</sub> O <sub>2</sub> ] (mmol L <sup>-1</sup> ) |                                                     |                                                      |                |
| NaBr                                                                             | 0.001                  | (N)             | Agitation (rpm)                              | 1200            |                                                                                                                    |                                            |                                                          |                                                          | 0.749                                               | 1.538                                                | 70.61          |
| Comment:<br>Catalyst activation: H <sub>2</sub> gas 20 sccm at 303 K for 40 min. |                        |                 |                                              |                 | Analysis of H <sub>2</sub> O <sub>2</sub> formation selectivity and H <sub>2</sub> O <sub>2</sub> destruction rate |                                            |                                                          | S <sub>f</sub> (—)                                       | 0.7435                                              |                                                      |                |
|                                                                                  |                        |                 |                                              |                 |                                                                                                                    |                                            |                                                          | k <sub>d</sub> [Cat] (h <sup>-1</sup> )                  | 0.4680                                              |                                                      |                |
|                                                                                  |                        |                 |                                              |                 |                                                                                                                    |                                            |                                                          | R <sup>2</sup>                                           | 0.9992                                              |                                                      |                |
| GC calibration                                                                   |                        | GC count        |                                              |                 | Ratio of sensitivity (toward N <sub>2</sub> )                                                                      |                                            | Feed gas measurement                                     |                                                          |                                                     |                                                      |                |
| Timing                                                                           | No.                    | H <sub>2</sub>  | O <sub>2</sub>                               | N <sub>2</sub>  | H <sub>2</sub>                                                                                                     | O <sub>2</sub>                             |                                                          |                                                          |                                                     |                                                      |                |
| Before reaction                                                                  | 1                      | 1416465         | 213340                                       | 111884          | 0.0914                                                                                                             | 0.0913                                     | 0.811                                                    | T <sub>a</sub> (°C)                                      | 20.7                                                |                                                      |                |
|                                                                                  | 2                      | 1417221         | 213137                                       | 111730          | 0.0912                                                                                                             |                                            |                                                          | 0.810                                                    | P <sub>0</sub> (hPa)                                | 1015.2                                               |                |
|                                                                                  | 3                      | 1417106         | 213075                                       | 111965          | 0.0914                                                                                                             |                                            |                                                          | 0.812                                                    | Flow (cc/min)                                       |                                                      |                |
| After reaction                                                                   | 4                      | 1421005         | 213123                                       | 111896          | 0.0911                                                                                                             |                                            |                                                          | 0.811                                                    | H <sub>2</sub>                                      | 19.13                                                |                |
|                                                                                  | 5                      | 1421042         | 213100                                       | 111908          | 0.0911                                                                                                             |                                            |                                                          | 0.811                                                    | O <sub>2</sub>                                      | 25.53                                                |                |
|                                                                                  | 6                      | 1423941         | 213628                                       | 112216          | 0.0912                                                                                                             |                                            |                                                          | 0.811                                                    | N <sub>2</sub>                                      | 16.53                                                |                |
| Time                                                                             |                        |                 |                                              | GC count        |                                                                                                                    |                                            | t <sub>correct</sub> (min)                               | Outlet flow (sccm)                                       |                                                     | Conversion(%)                                        |                |
| H                                                                                | M                      | S               | min.                                         | H <sub>2</sub>  | O <sub>2</sub>                                                                                                     | N <sub>2</sub>                             |                                                          | H <sub>2</sub>                                           | O <sub>2</sub>                                      | H <sub>2</sub>                                       | O <sub>2</sub> |
| 10                                                                               | 8                      | 30              | 4.0                                          | 753809          | 126602                                                                                                             | 233213                                     | 0.00                                                     | 9.59                                                     | 16.42                                               | 44.84                                                | 29.27          |
| 10                                                                               | 18                     | 32              | 14.0                                         | 1010252         | 193834                                                                                                             | 155323                                     | 10.04                                                    | 9.49                                                     | 16.53                                               | 45.45                                                | 28.79          |
| 10                                                                               | 28                     | 36              | 24.1                                         | 1009498         | 201303                                                                                                             | 148793                                     | 20.11                                                    | 9.38                                                     | 16.64                                               | 46.05                                                | 28.31          |
| 10                                                                               | 38                     | 38              | 34.1                                         | 1000470         | 203298                                                                                                             | 147958                                     | 30.14                                                    | 9.27                                                     | 16.74                                               | 46.68                                                | 27.87          |
| 10                                                                               | 48                     | 42              | 44.2                                         | 988108          | 204647                                                                                                             | 147647                                     | 40.21                                                    | 9.18                                                     | 16.89                                               | 47.23                                                | 27.24          |
| 10                                                                               | 58                     | 44              | 54.2                                         | 976834          | 205825                                                                                                             | 147819                                     | 50.24                                                    | 9.06                                                     | 16.97                                               | 47.89                                                | 26.91          |
| 11                                                                               | 8                      | 48              | 64.3                                         | 968863          | 206791                                                                                                             | 147482                                     | 60.31                                                    | 9.01                                                     | 17.08                                               | 48.20                                                | 26.40          |
| 11                                                                               | 18                     | 50              | 74.3                                         | 960329          | 207190                                                                                                             | 147097                                     | 70.34                                                    | 8.95                                                     | 17.16                                               | 48.52                                                | 26.06          |
| 11                                                                               | 28                     | 54              | 84.4                                         | 960063          | 208284                                                                                                             | 147034                                     | 80.41                                                    | 8.96                                                     | 17.26                                               | 48.51                                                | 25.64          |
| 11                                                                               | 38                     | 56              | 94.4                                         | 956493          | 209023                                                                                                             | 146876                                     | 90.44                                                    | 8.93                                                     | 17.34                                               | 48.65                                                | 25.30          |
| 11                                                                               | 48                     | 58              | 104.5                                        | 955151          | 209954                                                                                                             | 146767                                     | 100.48                                                   | 8.93                                                     | 17.43                                               | 48.68                                                | 24.91          |
| 11                                                                               | 59                     | 2               | 114.5                                        | 953214          | 210781                                                                                                             | 146747                                     | 110.54                                                   | 8.91                                                     | 17.50                                               | 48.78                                                | 24.60          |
| 12                                                                               | 9                      | 4               | 124.6                                        | 948940          | 211427                                                                                                             | 146821                                     | 120.58                                                   | 8.86                                                     | 17.55                                               | 49.03                                                | 24.41          |
| t <sub>correct</sub> (min)                                                       | Partial pressure (kPa) |                 | Rate (mmol L <sup>-1</sup> h <sup>-1</sup> ) |                 | d[H <sub>2</sub> O <sub>2</sub> ]/dt (mmol L <sup>-1</sup> h <sup>-1</sup> )                                       | Σ[H <sub>2</sub> ] (mmol L <sup>-1</sup> ) | [H <sub>2</sub> O <sub>2</sub> ] (mmol L <sup>-1</sup> ) | S <sub>e</sub> (—)                                       | Σ <sub>2</sub> [H <sub>2</sub> O <sub>2</sub> ] (h) | Σ <sub>1</sub> /[H <sub>2</sub> O <sub>2</sub> ] (—) |                |
|                                                                                  | P <sub>H2</sub>        | P <sub>O2</sub> | r <sub>H2</sub>                              | r <sub>O2</sub> |                                                                                                                    |                                            |                                                          |                                                          |                                                     |                                                      |                |
| 0.00                                                                             | 22.90                  | 39.18           | 69.64                                        | 60.66           | 51.69                                                                                                              | 0.00                                       | 0.00                                                     |                                                          | 0.000                                               | 0.000                                                |                |
| 10.04                                                                            | 22.64                  | 39.44           | 70.58                                        | 59.66           | 48.75                                                                                                              | 11.74                                      | 8.41                                                     | 0.72                                                     | 0.084                                               | 1.396                                                |                |
| 20.11                                                                            | 22.39                  | 39.71           | 71.52                                        | 58.66           | 45.81                                                                                                              | 23.66                                      | 16.34                                                    | 0.69                                                     | 0.170                                               | 1.448                                                |                |
| 30.14                                                                            | 22.13                  | 39.95           | 72.49                                        | 57.76           | 43.04                                                                                                              | 35.70                                      | 23.77                                                    | 0.67                                                     | 0.258                                               | 1.502                                                |                |
| 40.21                                                                            | 21.88                  | 40.25           | 73.34                                        | 56.46           | 39.57                                                                                                              | 47.93                                      | 30.70                                                    | 0.64                                                     | 0.349                                               | 1.561                                                |                |
| 50.24                                                                            | 21.62                  | 40.47           | 74.37                                        | 55.76           | 37.16                                                                                                              | 60.28                                      | 37.11                                                    | 0.62                                                     | 0.441                                               | 1.624                                                |                |
| 60.31                                                                            | 21.46                  | 40.69           | 74.84                                        | 54.71           | 34.57                                                                                                              | 72.80                                      | 43.13                                                    | 0.59                                                     | 0.536                                               | 1.688                                                |                |
| 70.34                                                                            | 21.32                  | 40.86           | 75.34                                        | 54.01           | 32.68                                                                                                              | 85.35                                      | 48.75                                                    | 0.57                                                     | 0.631                                               | 1.751                                                |                |
| 80.41                                                                            | 21.27                  | 40.99           | 75.33                                        | 53.14           | 30.94                                                                                                              | 97.99                                      | 54.09                                                    | 0.55                                                     | 0.729                                               | 1.812                                                |                |
| 90.44                                                                            | 21.18                  | 41.13           | 75.54                                        | 52.42           | 29.30                                                                                                              | 110.61                                     | 59.13                                                    | 0.53                                                     | 0.827                                               | 1.871                                                |                |
| 100.48                                                                           | 21.13                  | 41.26           | 75.60                                        | 51.62           | 27.64                                                                                                              | 123.25                                     | 63.89                                                    | 0.52                                                     | 0.926                                               | 1.929                                                |                |
| 110.54                                                                           | 21.06                  | 41.37           | 75.75                                        | 50.98           | 26.22                                                                                                              | 135.94                                     | 68.41                                                    | 0.50                                                     | 1.027                                               | 1.987                                                |                |
| 120.58                                                                           | 20.95                  | 41.48           | 76.14                                        | 50.58           | 25.02                                                                                                              | 148.64                                     | 72.69                                                    | 0.49                                                     | 1.129                                               | 2.045                                                |                |

## H<sub>2</sub>O<sub>2</sub> Synthesis Data Sheet

Entry No. 44 (Exp. T334) Employed in: Fig. 6

| Catalyst, Additives                                                              |                        |                 | Reaction conditions                          |                 | Gas feed rate (sccm)                                                                                               |                                            |                                                          |                                                          |                                                     |                                                      |                |
|----------------------------------------------------------------------------------|------------------------|-----------------|----------------------------------------------|-----------------|--------------------------------------------------------------------------------------------------------------------|--------------------------------------------|----------------------------------------------------------|----------------------------------------------------------|-----------------------------------------------------|------------------------------------------------------|----------------|
| Name                                                                             | Conc.                  | (Unit)          | T <sub>0</sub> (°C)                          | 28.5            |                                                                                                                    | H <sub>2</sub>                             | O <sub>2</sub>                                           | N <sub>2</sub>                                           | Sum                                                 |                                                      |                |
| Pd-PVP                                                                           | 8.31                   | (mg/L)          | T (°C)                                       | 29.9            | Set                                                                                                                | 5.00                                       | 20.00                                                    | 20.00                                                    | 45.00                                               |                                                      |                |
| Pt(NH <sub>3</sub> ) <sub>4</sub> (NO <sub>3</sub> ) <sub>2</sub>                | 0.0833                 | (mg-Pt/L)       | P <sub>0</sub> (hPa)                         | 1001.0          | Calibrated                                                                                                         | 5.05                                       | 18.08                                                    | 20.41                                                    | 43.54                                               |                                                      |                |
| H <sub>2</sub> SO <sub>4</sub>                                                   | 0.01                   | (N)             | P (hPa)                                      | 1007.3          | Determination of final [H <sub>2</sub> O <sub>2</sub> ]                                                            | Sample (g)                                 | Absorbance (—)                                           | [H <sub>2</sub> O <sub>2</sub> ] (mmol L <sup>-1</sup> ) |                                                     |                                                      |                |
| NaBr                                                                             | 0.001                  | (N)             | Agitation (rpm)                              | 1201            |                                                                                                                    |                                            |                                                          |                                                          | 1.621                                               | 1.149                                                | 24.43          |
| Comment:<br>Catalyst activation: H <sub>2</sub> gas 20 sccm at 303 K for 40 min. |                        |                 |                                              |                 | Analysis of H <sub>2</sub> O <sub>2</sub> formation selectivity and H <sub>2</sub> O <sub>2</sub> destruction rate |                                            |                                                          | S <sub>f</sub> (—)                                       | 0.5142                                              |                                                      |                |
|                                                                                  |                        |                 |                                              |                 |                                                                                                                    |                                            |                                                          | k <sub>d</sub> [Cat] (h <sup>-1</sup> )                  | 0.2213                                              |                                                      |                |
|                                                                                  |                        |                 |                                              |                 |                                                                                                                    |                                            |                                                          | R <sup>2</sup>                                           | 0.9663                                              |                                                      |                |
| GC calibration                                                                   |                        | GC count        |                                              |                 | Ratio of sensitivity (toward N <sub>2</sub> )                                                                      |                                            | Feed gas measurement                                     |                                                          |                                                     |                                                      |                |
| Timing                                                                           | No.                    | H <sub>2</sub>  | O <sub>2</sub>                               | N <sub>2</sub>  | H <sub>2</sub>                                                                                                     | O <sub>2</sub>                             |                                                          |                                                          |                                                     |                                                      |                |
| Before reaction                                                                  | 1                      | 872843          | 339074                                       | 305396          | 0.0866                                                                                                             | 0.0866                                     | 0.798                                                    | T <sub>a</sub> (°C)                                      | 28.6                                                |                                                      |                |
|                                                                                  | 2                      | 881754          | 342473                                       | 308374          | 0.0865                                                                                                             |                                            |                                                          | 0.798                                                    | P <sub>0</sub> (hPa)                                | 1000.3                                               |                |
|                                                                                  | 3                      | 882412          | 342666                                       | 308543          | 0.0865                                                                                                             |                                            |                                                          | 0.798                                                    | Flow (cc/min)                                       |                                                      |                |
| After reaction                                                                   | 4                      | 890721          | 346315                                       | 311793          | 0.0866                                                                                                             |                                            |                                                          | 0.798                                                    | H <sub>2</sub>                                      | 5.88                                                 |                |
|                                                                                  | 5                      | 897575          | 348682                                       | 313797          | 0.0865                                                                                                             |                                            |                                                          | 0.797                                                    | O <sub>2</sub>                                      | 21.05                                                |                |
|                                                                                  | 6                      | 898474          | 349390                                       | 314501          | 0.0866                                                                                                             |                                            |                                                          | 0.797                                                    | N <sub>2</sub>                                      | 23.76                                                |                |
| Time                                                                             |                        |                 |                                              | GC count        |                                                                                                                    |                                            | t <sub>correct</sub> (min)                               | Outlet flow (sccm)                                       |                                                     | Conversion(%)                                        |                |
| H                                                                                | M                      | S               | min.                                         | H <sub>2</sub>  | O <sub>2</sub>                                                                                                     | N <sub>2</sub>                             |                                                          | H <sub>2</sub>                                           | O <sub>2</sub>                                      | H <sub>2</sub>                                       | O <sub>2</sub> |
| 16                                                                               | 39                     | 38              | 4.0                                          | 185046          | 108299                                                                                                             | 338725                                     | 0.00                                                     | 1.81                                                     | 15.61                                               | 64.08                                                | 13.65          |
| 16                                                                               | 49                     | 40              | 14.0                                         | 244429          | 208927                                                                                                             | 253791                                     | 8.85                                                     | 1.83                                                     | 15.66                                               | 63.73                                                | 13.39          |
| 16                                                                               | 59                     | 44              | 24.1                                         | 249507          | 226631                                                                                                             | 239753                                     | 18.91                                                    | 1.85                                                     | 15.71                                               | 63.33                                                | 13.08          |
| 17                                                                               | 9                      | 46              | 34.1                                         | 251229          | 229480                                                                                                             | 236895                                     | 28.95                                                    | 1.87                                                     | 15.77                                               | 62.90                                                | 12.79          |
| 17                                                                               | 19                     | 50              | 44.2                                         | 247982          | 225610                                                                                                             | 232018                                     | 39.01                                                    | 1.89                                                     | 15.83                                               | 62.61                                                | 12.45          |
| 17                                                                               | 29                     | 52              | 54.2                                         | 253281          | 228054                                                                                                             | 233781                                     | 49.05                                                    | 1.91                                                     | 15.88                                               | 62.10                                                | 12.17          |
| 17                                                                               | 39                     | 56              | 64.3                                         | 256153          | 230066                                                                                                             | 235766                                     | 59.11                                                    | 1.92                                                     | 15.88                                               | 61.99                                                | 12.14          |
| 17                                                                               | 49                     | 58              | 74.3                                         | 257685          | 229723                                                                                                             | 235189                                     | 69.15                                                    | 1.94                                                     | 15.90                                               | 61.67                                                | 12.06          |
| 18                                                                               | 0                      | 2               | 84.4                                         | 258421          | 229302                                                                                                             | 234592                                     | 79.21                                                    | 1.95                                                     | 15.91                                               | 61.46                                                | 12.00          |
| 18                                                                               | 10                     | 4               | 94.4                                         | 259553          | 229893                                                                                                             | 235023                                     | 89.25                                                    | 1.95                                                     | 15.92                                               | 61.37                                                | 11.93          |
| 18                                                                               | 20                     | 8               | 104.5                                        | 261229          | 230380                                                                                                             | 235396                                     | 99.31                                                    | 1.96                                                     | 15.93                                               | 61.18                                                | 11.89          |
| 18                                                                               | 30                     | 10              | 114.5                                        | 261112          | 230241                                                                                                             | 235316                                     | 109.35                                                   | 1.96                                                     | 15.93                                               | 61.18                                                | 11.91          |
| 18                                                                               | 40                     | 12              | 124.6                                        | 258073          | 227630                                                                                                             | 232367                                     | 119.38                                                   | 1.96                                                     | 15.95                                               | 61.15                                                | 11.80          |
| t <sub>correct</sub> (min)                                                       | Partial pressure (kPa) |                 | Rate (mmol L <sup>-1</sup> h <sup>-1</sup> ) |                 | d[H <sub>2</sub> O <sub>2</sub> ]/dt (mmol L <sup>-1</sup> h <sup>-1</sup> )                                       | Σ[H <sub>2</sub> ] (mmol L <sup>-1</sup> ) | [H <sub>2</sub> O <sub>2</sub> ] (mmol L <sup>-1</sup> ) | S <sub>e</sub> (—)                                       | Σ <sub>2</sub> [H <sub>2</sub> O <sub>2</sub> ] (h) | Σ <sub>1</sub> /[H <sub>2</sub> O <sub>2</sub> ] (—) |                |
|                                                                                  | P <sub>H2</sub>        | P <sub>O2</sub> | r <sub>H2</sub>                              | r <sub>O2</sub> |                                                                                                                    |                                            |                                                          |                                                          |                                                     |                                                      |                |
| 0.00                                                                             | 4.63                   | 39.82           | 28.89                                        | 22.04           | 15.18                                                                                                              | 0.00                                       | 0.00                                                     |                                                          | 0.000                                               | 0.000                                                |                |
| 8.85                                                                             | 4.66                   | 39.87           | 28.74                                        | 21.61           | 14.48                                                                                                              | 4.25                                       | 2.19                                                     | 0.51                                                     | 0.074                                               | 1.943                                                |                |
| 18.91                                                                            | 4.71                   | 39.93           | 28.56                                        | 21.12           | 13.67                                                                                                              | 9.06                                       | 4.55                                                     | 0.50                                                     | 0.160                                               | 1.991                                                |                |
| 28.95                                                                            | 4.75                   | 39.99           | 28.36                                        | 20.64           | 12.92                                                                                                              | 13.81                                      | 6.77                                                     | 0.49                                                     | 0.247                                               | 2.040                                                |                |
| 39.01                                                                            | 4.78                   | 40.06           | 28.23                                        | 20.10           | 11.98                                                                                                              | 18.56                                      | 8.86                                                     | 0.48                                                     | 0.337                                               | 2.095                                                |                |
| 49.05                                                                            | 4.84                   | 40.11           | 28.00                                        | 19.65           | 11.30                                                                                                              | 23.26                                      | 10.81                                                    | 0.46                                                     | 0.428                                               | 2.153                                                |                |
| 59.11                                                                            | 4.85                   | 40.11           | 27.95                                        | 19.60           | 11.25                                                                                                              | 27.96                                      | 12.70                                                    | 0.45                                                     | 0.520                                               | 2.202                                                |                |
| 69.15                                                                            | 4.88                   | 40.12           | 27.81                                        | 19.47           | 11.13                                                                                                              | 32.62                                      | 14.57                                                    | 0.45                                                     | 0.609                                               | 2.239                                                |                |
| 79.21                                                                            | 4.91                   | 40.12           | 27.71                                        | 19.37           | 11.02                                                                                                              | 37.28                                      | 16.43                                                    | 0.44                                                     | 0.699                                               | 2.269                                                |                |
| 89.25                                                                            | 4.92                   | 40.14           | 27.67                                        | 19.26           | 10.85                                                                                                              | 41.91                                      | 18.26                                                    | 0.44                                                     | 0.788                                               | 2.296                                                |                |
| 99.31                                                                            | 4.94                   | 40.14           | 27.59                                        | 19.19           | 10.79                                                                                                              | 46.54                                      | 20.07                                                    | 0.43                                                     | 0.877                                               | 2.319                                                |                |
| 109.35                                                                           | 4.94                   | 40.13           | 27.59                                        | 19.22           | 10.86                                                                                                              | 51.16                                      | 21.88                                                    | 0.43                                                     | 0.964                                               | 2.338                                                |                |
| 119.38                                                                           | 4.94                   | 40.16           | 27.57                                        | 19.05           | 10.53                                                                                                              | 55.77                                      | 23.67                                                    | 0.42                                                     | 1.052                                               | 2.356                                                |                |

## H<sub>2</sub>O<sub>2</sub> Synthesis Data Sheet

Entry No. 45 (Exp. T333) Employed in: Fig 6

| Catalyst, Additives                                                              |                        |                 | Reaction conditions                          |                 | Gas feed rate (sccm)                                                                                               |                                            |                                                          |                                                          |                                                     |                                                      |                |
|----------------------------------------------------------------------------------|------------------------|-----------------|----------------------------------------------|-----------------|--------------------------------------------------------------------------------------------------------------------|--------------------------------------------|----------------------------------------------------------|----------------------------------------------------------|-----------------------------------------------------|------------------------------------------------------|----------------|
| Name                                                                             | Conc.                  | (Unit)          | T <sub>0</sub> (°C)                          | 28.7            |                                                                                                                    | H <sub>2</sub>                             | O <sub>2</sub>                                           | N <sub>2</sub>                                           | Sum                                                 |                                                      |                |
| Pd-PVP                                                                           | 8.31                   | (mg/L)          | T (°C)                                       | 30.0            | Set                                                                                                                | 11.50                                      | 20.00                                                    | 20.00                                                    | 51.50                                               |                                                      |                |
| Pt(NH <sub>3</sub> ) <sub>4</sub> (NO <sub>3</sub> ) <sub>2</sub>                | 0.0833                 | (mg-Pt/L)       | P <sub>0</sub> (hPa)                         | 1001.5          | Calibrated                                                                                                         | 11.71                                      | 18.23                                                    | 20.28                                                    | 50.22                                               |                                                      |                |
| H <sub>2</sub> SO <sub>4</sub>                                                   | 0.01                   | (N)             | P (hPa)                                      | 1007.7          | Determination of final [H <sub>2</sub> O <sub>2</sub> ]                                                            | Sample (g)                                 | Absorbance (—)                                           | [H <sub>2</sub> O <sub>2</sub> ] (mmol L <sup>-1</sup> ) |                                                     |                                                      |                |
| NaBr                                                                             | 0.001                  | (N)             | Agitation (rpm)                              | 1199            |                                                                                                                    |                                            |                                                          |                                                          |                                                     | 1.687                                                | 2.155          |
| Comment:<br>Catalyst activation: H <sub>2</sub> gas 20 sccm at 303 K for 40 min. |                        |                 |                                              |                 | Analysis of H <sub>2</sub> O <sub>2</sub> formation selectivity and H <sub>2</sub> O <sub>2</sub> destruction rate |                                            |                                                          | S <sub>f</sub> (—)                                       | 0.4525                                              |                                                      |                |
|                                                                                  |                        |                 |                                              |                 |                                                                                                                    |                                            |                                                          | k <sub>d</sub> [Cat] (h <sup>-1</sup> )                  | 0.1791                                              |                                                      |                |
|                                                                                  |                        |                 |                                              |                 |                                                                                                                    |                                            |                                                          | R <sup>2</sup>                                           | 0.9972                                              |                                                      |                |
| GC calibration                                                                   |                        | GC count        |                                              |                 | Ratio of sensitivity (toward N <sub>2</sub> )                                                                      |                                            | Feed gas measurement                                     |                                                          |                                                     |                                                      |                |
| Timing                                                                           | No.                    | H <sub>2</sub>  | O <sub>2</sub>                               | N <sub>2</sub>  | H <sub>2</sub>                                                                                                     | O <sub>2</sub>                             |                                                          |                                                          |                                                     |                                                      |                |
| Before reaction                                                                  | 1                      | 1562728         | 275599                                       | 247355          | 0.0914                                                                                                             | 0.0916                                     | 0.807                                                    | T <sub>a</sub> (°C)                                      | 28.8                                                |                                                      |                |
|                                                                                  | 2                      | 1610231         | 284324                                       | 255235          | 0.0915                                                                                                             |                                            |                                                          | 0.807                                                    | P <sub>0</sub> (hPa)                                | 1002.7                                               |                |
|                                                                                  | 3                      | 1629034         | 287581                                       | 258099          | 0.0914                                                                                                             |                                            |                                                          | 0.807                                                    | Flow (cc/min)                                       |                                                      |                |
| After reaction                                                                   | 4                      | 1764017         | 312181                                       | 280234          | 0.0917                                                                                                             |                                            |                                                          | 0.807                                                    | H <sub>2</sub>                                      | 13.61                                                |                |
|                                                                                  | 5                      | 1767572         | 312941                                       | 280962          | 0.0917                                                                                                             |                                            |                                                          | 0.807                                                    | O <sub>2</sub>                                      | 21.20                                                |                |
|                                                                                  | 6                      | 1769011         | 313192                                       | 281166          | 0.0917                                                                                                             |                                            |                                                          | 0.807                                                    | N <sub>2</sub>                                      | 23.58                                                |                |
| Time                                                                             |                        |                 |                                              | GC count        |                                                                                                                    |                                            | t <sub>correct</sub> (min)                               | Outlet flow (sccm)                                       |                                                     | Conversion(%)                                        |                |
| H                                                                                | M                      | S               | min.                                         | H <sub>2</sub>  | O <sub>2</sub>                                                                                                     | N <sub>2</sub>                             |                                                          | H <sub>2</sub>                                           | O <sub>2</sub>                                      | H <sub>2</sub>                                       | O <sub>2</sub> |
| 12                                                                               | 15                     | 42              | 4.0                                          | 412385          | 88729                                                                                                              | 304945                                     | 0.00                                                     | 4.17                                                     | 12.76                                               | 64.33                                                | 30.03          |
| 12                                                                               | 25                     | 44              | 14.0                                         | 511148          | 168382                                                                                                             | 248382                                     | 8.76                                                     | 4.19                                                     | 12.82                                               | 64.18                                                | 29.71          |
| 12                                                                               | 35                     | 48              | 24.1                                         | 536907          | 183664                                                                                                             | 238067                                     | 18.83                                                    | 4.21                                                     | 12.88                                               | 63.99                                                | 29.33          |
| 12                                                                               | 45                     | 50              | 34.1                                         | 538981          | 186941                                                                                                             | 236404                                     | 28.86                                                    | 4.23                                                     | 12.94                                               | 63.83                                                | 29.02          |
| 12                                                                               | 55                     | 54              | 44.2                                         | 543549          | 188782                                                                                                             | 236898                                     | 38.93                                                    | 4.26                                                     | 13.04                                               | 63.60                                                | 28.47          |
| 13                                                                               | 5                      | 56              | 54.2                                         | 535403          | 185776                                                                                                             | 232466                                     | 48.96                                                    | 4.28                                                     | 13.08                                               | 63.46                                                | 28.26          |
| 13                                                                               | 16                     | 0               | 64.3                                         | 550045          | 190663                                                                                                             | 237415                                     | 59.03                                                    | 4.30                                                     | 13.14                                               | 63.24                                                | 27.91          |
| 13                                                                               | 26                     | 2               | 74.3                                         | 553825          | 191459                                                                                                             | 237614                                     | 69.06                                                    | 4.33                                                     | 13.19                                               | 63.02                                                | 27.67          |
| 13                                                                               | 36                     | 4               | 84.4                                         | 556771          | 192767                                                                                                             | 238682                                     | 79.10                                                    | 4.33                                                     | 13.22                                               | 62.99                                                | 27.50          |
| 13                                                                               | 46                     | 8               | 94.4                                         | 559209          | 193005                                                                                                             | 237969                                     | 89.16                                                    | 4.36                                                     | 13.27                                               | 62.72                                                | 27.20          |
| 13                                                                               | 56                     | 10              | 104.5                                        | 556997          | 192754                                                                                                             | 237210                                     | 99.20                                                    | 4.36                                                     | 13.30                                               | 62.74                                                | 27.06          |
| 14                                                                               | 6                      | 14              | 114.5                                        | 561936          | 193903                                                                                                             | 237698                                     | 109.26                                                   | 4.39                                                     | 13.35                                               | 62.49                                                | 26.77          |
| 14                                                                               | 16                     | 16              | 124.6                                        | 564938          | 194606                                                                                                             | 237701                                     | 119.30                                                   | 4.41                                                     | 13.40                                               | 62.29                                                | 26.51          |
| t <sub>correct</sub> (min)                                                       | Partial pressure (kPa) |                 | Rate (mmol L <sup>-1</sup> h <sup>-1</sup> ) |                 | d[H <sub>2</sub> O <sub>2</sub> ]/dt (mmol L <sup>-1</sup> h <sup>-1</sup> )                                       | Σ[H <sub>2</sub> ] (mmol L <sup>-1</sup> ) | [H <sub>2</sub> O <sub>2</sub> ] (mmol L <sup>-1</sup> ) | S <sub>e</sub> (—)                                       | Σ <sub>2</sub> [H <sub>2</sub> O <sub>2</sub> ] (h) | Σ <sub>1</sub> /[H <sub>2</sub> O <sub>2</sub> ] (—) |                |
| 0.00                                                                             | P <sub>H2</sub>        | P <sub>O2</sub> | r <sub>H2</sub>                              | r <sub>O2</sub> |                                                                                                                    |                                            |                                                          |                                                          |                                                     |                                                      |                |
| 0.00                                                                             | 10.83                  | 33.09           | 67.24                                        | 48.88           | 30.53                                                                                                              | 0.00                                       | 0.00                                                     |                                                          | 0.000                                               | 0.000                                                |                |
| 8.76                                                                             | 10.85                  | 33.18           | 67.07                                        | 48.36           | 29.65                                                                                                              | 9.81                                       | 4.39                                                     | 0.45                                                     | 0.073                                               | 2.232                                                |                |
| 18.83                                                                            | 10.88                  | 33.27           | 66.88                                        | 47.75           | 28.62                                                                                                              | 21.05                                      | 9.28                                                     | 0.44                                                     | 0.158                                               | 2.267                                                |                |
| 28.86                                                                            | 10.91                  | 33.35           | 66.71                                        | 47.24           | 27.77                                                                                                              | 32.21                                      | 14.00                                                    | 0.43                                                     | 0.244                                               | 2.301                                                |                |
| 38.93                                                                            | 10.94                  | 33.50           | 66.46                                        | 46.34           | 26.22                                                                                                              | 43.39                                      | 18.53                                                    | 0.43                                                     | 0.332                                               | 2.342                                                |                |
| 48.96                                                                            | 10.97                  | 33.55           | 66.32                                        | 46.01           | 25.70                                                                                                              | 54.49                                      | 22.87                                                    | 0.42                                                     | 0.420                                               | 2.383                                                |                |
| 59.03                                                                            | 11.01                  | 33.63           | 66.09                                        | 45.44           | 24.78                                                                                                              | 65.60                                      | 27.10                                                    | 0.41                                                     | 0.509                                               | 2.420                                                |                |
| 69.06                                                                            | 11.06                  | 33.68           | 65.86                                        | 45.05           | 24.23                                                                                                              | 76.63                                      | 31.20                                                    | 0.41                                                     | 0.598                                               | 2.456                                                |                |
| 79.10                                                                            | 11.06                  | 33.73           | 65.83                                        | 44.77           | 23.72                                                                                                              | 87.64                                      | 35.21                                                    | 0.40                                                     | 0.688                                               | 2.489                                                |                |
| 89.16                                                                            | 11.11                  | 33.80           | 65.54                                        | 44.27           | 23.00                                                                                                              | 98.66                                      | 39.13                                                    | 0.40                                                     | 0.778                                               | 2.521                                                |                |
| 99.20                                                                            | 11.10                  | 33.84           | 65.57                                        | 44.05           | 22.52                                                                                                              | 109.62                                     | 42.94                                                    | 0.39                                                     | 0.869                                               | 2.553                                                |                |
| 109.26                                                                           | 11.15                  | 33.90           | 65.31                                        | 43.59           | 21.86                                                                                                              | 120.60                                     | 46.66                                                    | 0.39                                                     | 0.961                                               | 2.585                                                |                |
| 119.30                                                                           | 11.19                  | 33.96           | 65.10                                        | 43.16           | 21.21                                                                                                              | 131.51                                     | 50.26                                                    | 0.38                                                     | 1.053                                               | 2.616                                                |                |

## H<sub>2</sub>O<sub>2</sub> Synthesis Data Sheet

Entry No. 46 (Exp. T335) Employed in: Fig 6

| Catalyst, Additives                                                              |                        |                 | Reaction conditions                          |                 | Gas feed rate (sccm)                                                                                               |                                            |                                                          |                                                          |                                                     |                                                      |                |
|----------------------------------------------------------------------------------|------------------------|-----------------|----------------------------------------------|-----------------|--------------------------------------------------------------------------------------------------------------------|--------------------------------------------|----------------------------------------------------------|----------------------------------------------------------|-----------------------------------------------------|------------------------------------------------------|----------------|
| Name                                                                             | Conc.                  | (Unit)          | T <sub>0</sub> (°C)                          | 27.8            |                                                                                                                    | H <sub>2</sub>                             | O <sub>2</sub>                                           | N <sub>2</sub>                                           | Sum                                                 |                                                      |                |
| Pd-PVP                                                                           | 8.31                   | (mg/L)          | T (°C)                                       | 29.9            | Set                                                                                                                | 12.00                                      | 20.00                                                    | 20.00                                                    | 52.00                                               |                                                      |                |
| Pt(NH <sub>3</sub> ) <sub>4</sub> (NO <sub>3</sub> ) <sub>2</sub>                | 0.0833                 | (mg-Pt/L)       | P <sub>0</sub> (hPa)                         | 1004.2          | Calibrated                                                                                                         | 12.14                                      | 17.92                                                    | 20.38                                                    | 50.43                                               |                                                      |                |
| H <sub>2</sub> SO <sub>4</sub>                                                   | 0.01                   | (N)             | P (hPa)                                      | 1010.4          | Determination of final [H <sub>2</sub> O <sub>2</sub> ]                                                            | Sample (g)                                 | Absorbance (—)                                           | [H <sub>2</sub> O <sub>2</sub> ] (mmol L <sup>-1</sup> ) |                                                     |                                                      |                |
| NaBr                                                                             | 0.001                  | (N)             | Agitation (rpm)                              | 1200            |                                                                                                                    |                                            |                                                          |                                                          | 1.709                                               | 2.301                                                | 46.41          |
| Comment:<br>Catalyst activation: H <sub>2</sub> gas 20 sccm at 303 K for 40 min. |                        |                 |                                              |                 | Analysis of H <sub>2</sub> O <sub>2</sub> formation selectivity and H <sub>2</sub> O <sub>2</sub> destruction rate |                                            |                                                          | S <sub>f</sub> (—)                                       | 0.4261                                              |                                                      |                |
|                                                                                  |                        |                 |                                              |                 |                                                                                                                    |                                            |                                                          | k <sub>d</sub> [Cat] (h <sup>-1</sup> )                  | 0.1635                                              |                                                      |                |
|                                                                                  |                        |                 |                                              |                 |                                                                                                                    |                                            |                                                          | R <sup>2</sup>                                           | 0.9978                                              |                                                      |                |
| GC calibration                                                                   |                        | GC count        |                                              |                 | Ratio of sensitivity (toward N <sub>2</sub> )                                                                      |                                            | Feed gas measurement                                     |                                                          |                                                     |                                                      |                |
| Timing                                                                           | No.                    | H <sub>2</sub>  | O <sub>2</sub>                               | N <sub>2</sub>  | H <sub>2</sub>                                                                                                     | O <sub>2</sub>                             |                                                          |                                                          |                                                     |                                                      |                |
| Before reaction                                                                  | 1                      | 1643781         | 278311                                       | 249202          | 0.0903                                                                                                             | 0.0905                                     | 0.788                                                    | T <sub>a</sub> (°C)                                      | 28.4                                                |                                                      |                |
|                                                                                  | 2                      | 1678103         | 284392                                       | 254639          | 0.0904                                                                                                             |                                            |                                                          | 0.788                                                    | P <sub>0</sub> (hPa)                                | 1004.8                                               |                |
|                                                                                  | 3                      | 1706744         | 289429                                       | 259238          | 0.0905                                                                                                             |                                            |                                                          | 0.788                                                    | Flow (cc/min)                                       |                                                      |                |
| After reaction                                                                   | 4                      | 1821414         | 309628                                       | 277471          | 0.0907                                                                                                             |                                            |                                                          | 0.788                                                    | H <sub>2</sub>                                      | 14.05                                                |                |
|                                                                                  | 5                      | 1823768         | 310038                                       | 277821          | 0.0907                                                                                                             |                                            |                                                          | 0.788                                                    | O <sub>2</sub>                                      | 20.75                                                |                |
|                                                                                  | 6                      | 1818186         | 308985                                       | 276897          | 0.0907                                                                                                             |                                            |                                                          | 0.788                                                    | N <sub>2</sub>                                      | 23.59                                                |                |
| Time                                                                             |                        |                 |                                              | GC count        |                                                                                                                    |                                            | t <sub>correct</sub> (min)                               | Outlet flow (sccm)                                       |                                                     | Conversion(%)                                        |                |
| H                                                                                | M                      | S               | min.                                         | H <sub>2</sub>  | O <sub>2</sub>                                                                                                     | N <sub>2</sub>                             |                                                          | H <sub>2</sub>                                           | O <sub>2</sub>                                      | H <sub>2</sub>                                       | O <sub>2</sub> |
| 12                                                                               | 1                      | 16              | 4.0                                          | 389361          | 86825                                                                                                              | 303351                                     | 0.00                                                     | 4.27                                                     | 12.31                                               | 64.78                                                | 31.31          |
| 12                                                                               | 11                     | 18              | 14.0                                         | 498601          | 161137                                                                                                             | 244684                                     | 8.71                                                     | 4.29                                                     | 12.36                                               | 64.65                                                | 31.02          |
| 12                                                                               | 21                     | 22              | 24.1                                         | 528440          | 178443                                                                                                             | 237135                                     | 18.77                                                    | 4.31                                                     | 12.42                                               | 64.50                                                | 30.68          |
| 12                                                                               | 31                     | 24              | 34.1                                         | 549769          | 182415                                                                                                             | 234744                                     | 28.81                                                    | 4.32                                                     | 12.48                                               | 64.39                                                | 30.39          |
| 12                                                                               | 41                     | 26              | 44.2                                         | 560348          | 185744                                                                                                             | 237383                                     | 38.84                                                    | 4.36                                                     | 12.56                                               | 64.11                                                | 29.91          |
| 12                                                                               | 51                     | 30              | 54.2                                         | 561044          | 186386                                                                                                             | 237527                                     | 48.91                                                    | 4.36                                                     | 12.60                                               | 64.09                                                | 29.71          |
| 13                                                                               | 1                      | 32              | 64.3                                         | 563945          | 187375                                                                                                             | 238010                                     | 58.94                                                    | 4.37                                                     | 12.64                                               | 63.98                                                | 29.48          |
| 13                                                                               | 11                     | 36              | 74.3                                         | 563452          | 187521                                                                                                             | 237710                                     | 69.01                                                    | 4.37                                                     | 12.67                                               | 63.96                                                | 29.33          |
| 13                                                                               | 21                     | 38              | 84.4                                         | 566373          | 188740                                                                                                             | 238717                                     | 79.04                                                    | 4.38                                                     | 12.69                                               | 63.93                                                | 29.17          |
| 13                                                                               | 31                     | 42              | 94.4                                         | 561524          | 186615                                                                                                             | 235017                                     | 89.11                                                    | 4.41                                                     | 12.75                                               | 63.67                                                | 28.87          |
| 13                                                                               | 37                     | 42              | 100.4                                        | 563336          | 188802                                                                                                             | 237652                                     | 95.11                                                    | 4.37                                                     | 12.75                                               | 63.96                                                | 28.83          |
| 13                                                                               | 47                     | 46              | 110.5                                        | 569930          | 189118                                                                                                             | 236707                                     | 105.17                                                   | 4.44                                                     | 12.83                                               | 63.39                                                | 28.43          |
| 13                                                                               | 57                     | 50              | 120.6                                        | 574044          | 190488                                                                                                             | 237702                                     | 115.24                                                   | 4.46                                                     | 12.87                                               | 63.28                                                | 28.21          |
| t <sub>correct</sub> (min)                                                       | Partial pressure (kPa) |                 | Rate (mmol L <sup>-1</sup> h <sup>-1</sup> ) |                 | d[H <sub>2</sub> O <sub>2</sub> ]/dt (mmol L <sup>-1</sup> h <sup>-1</sup> )                                       | Σ[H <sub>2</sub> ] (mmol L <sup>-1</sup> ) | [H <sub>2</sub> O <sub>2</sub> ] (mmol L <sup>-1</sup> ) | S <sub>e</sub> (—)                                       | Σ <sub>2</sub> [H <sub>2</sub> O <sub>2</sub> ] (h) | Σ <sub>1</sub> /[H <sub>2</sub> O <sub>2</sub> ] (—) |                |
| 0.00                                                                             | P <sub>H2</sub>        | P <sub>O2</sub> | r <sub>H2</sub>                              | r <sub>O2</sub> |                                                                                                                    |                                            |                                                          |                                                          |                                                     |                                                      |                |
| 8.71                                                                             | 11.19                  | 32.24           | 70.19                                        | 50.10           | 30.01                                                                                                              | 0.00                                       | 0.00                                                     |                                                          | 0.000                                               | 0.000                                                |                |
| 18.77                                                                            | 11.21                  | 32.32           | 70.05                                        | 49.64           | 29.22                                                                                                              | 10.18                                      | 4.30                                                     | 0.42                                                     | 0.073                                               | 2.368                                                |                |
| 28.81                                                                            | 11.24                  | 32.41           | 69.89                                        | 49.09           | 28.30                                                                                                              | 21.92                                      | 9.12                                                     | 0.42                                                     | 0.158                                               | 2.402                                                |                |
| 38.84                                                                            | 11.25                  | 32.49           | 69.77                                        | 48.63           | 27.48                                                                                                              | 33.59                                      | 13.79                                                    | 0.41                                                     | 0.243                                               | 2.437                                                |                |
| 48.91                                                                            | 11.30                  | 32.61           | 69.47                                        | 47.86           | 26.25                                                                                                              | 45.24                                      | 18.28                                                    | 0.40                                                     | 0.330                                               | 2.475                                                |                |
| 58.94                                                                            | 11.30                  | 32.67           | 69.44                                        | 47.54           | 25.63                                                                                                              | 56.89                                      | 22.63                                                    | 0.40                                                     | 0.418                                               | 2.514                                                |                |
| 69.01                                                                            | 11.32                  | 32.73           | 69.32                                        | 47.17           | 25.02                                                                                                              | 68.49                                      | 26.87                                                    | 0.39                                                     | 0.506                                               | 2.549                                                |                |
| 79.04                                                                            | 11.31                  | 32.77           | 69.31                                        | 46.94           | 24.57                                                                                                              | 80.12                                      | 31.03                                                    | 0.39                                                     | 0.595                                               | 2.582                                                |                |
| 89.11                                                                            | 11.32                  | 32.81           | 69.27                                        | 46.68           | 24.10                                                                                                              | 91.71                                      | 35.10                                                    | 0.38                                                     | 0.684                                               | 2.613                                                |                |
| 95.11                                                                            | 11.37                  | 32.88           | 68.99                                        | 46.20           | 23.40                                                                                                              | 103.31                                     | 39.08                                                    | 0.38                                                     | 0.773                                               | 2.643                                                |                |
| 105.17                                                                           | 11.29                  | 32.92           | 69.30                                        | 46.14           | 22.97                                                                                                              | 110.22                                     | 41.40                                                    | 0.38                                                     | 0.827                                               | 2.662                                                |                |
| 115.24                                                                           | 11.42                  | 32.99           | 68.69                                        | 45.49           | 22.30                                                                                                              | 121.80                                     | 45.20                                                    | 0.37                                                     | 0.918                                               | 2.695                                                |                |
|                                                                                  | 11.44                  | 33.04           | 68.57                                        | 45.15           | 21.72                                                                                                              | 133.31                                     | 48.89                                                    | 0.37                                                     | 1.010                                               | 2.727                                                |                |

## H<sub>2</sub>O<sub>2</sub> Synthesis Data Sheet

Entry No. 47 (Exp. T337) Employed in: Fig. 6

| Catalyst, Additives                                                              |                        |                 | Reaction conditions                          |                 | Gas feed rate (sccm)                                                                                               |                                            |                                                          |                                         |                                                     |                                                      |                |
|----------------------------------------------------------------------------------|------------------------|-----------------|----------------------------------------------|-----------------|--------------------------------------------------------------------------------------------------------------------|--------------------------------------------|----------------------------------------------------------|-----------------------------------------|-----------------------------------------------------|------------------------------------------------------|----------------|
| Name                                                                             | Conc.                  | (Unit)          | T <sub>0</sub> (°C)                          | 29.4            |                                                                                                                    | H <sub>2</sub>                             | O <sub>2</sub>                                           | N <sub>2</sub>                          | Sum                                                 |                                                      |                |
| Pd-PVP                                                                           | 8.31                   | (mg/L)          | T (°C)                                       | 29.9            | Set                                                                                                                | 11.50                                      | 20.00                                                    | 20.00                                   | 51.50                                               |                                                      |                |
| Pt(NH <sub>3</sub> ) <sub>4</sub> (NO <sub>3</sub> ) <sub>2</sub>                | 0.0833                 | (mg-Pt/L)       | P <sub>0</sub> (hPa)                         | 1009.8          | Calibrated                                                                                                         | 11.72                                      | 18.15                                                    | 20.37                                   | 50.23                                               |                                                      |                |
| H <sub>2</sub> SO <sub>4</sub>                                                   | 0.01                   | (N)             | P (hPa)                                      | 1016.1          | Determination of final [H <sub>2</sub> O <sub>2</sub> ]                                                            | Sample (g)                                 | Absorbance (—)                                           | [H <sub>2</sub> O <sub>2</sub> ]        |                                                     |                                                      |                |
| NaBr                                                                             | 0.001                  | (N)             | Agitation (rpm)                              | 1200            |                                                                                                                    |                                            |                                                          | 1.608                                   | 2.155                                               | (mmol L <sup>-1</sup> )                              | 46.19          |
| Comment:<br>Catalyst activation: H <sub>2</sub> gas 20 sccm at 303 K for 40 min. |                        |                 |                                              |                 | Analysis of H <sub>2</sub> O <sub>2</sub> formation selectivity and H <sub>2</sub> O <sub>2</sub> destruction rate |                                            |                                                          | S <sub>f</sub> (—)                      | 0.4759                                              |                                                      |                |
|                                                                                  |                        |                 |                                              |                 |                                                                                                                    |                                            |                                                          | k <sub>d</sub> [Cat] (h <sup>-1</sup> ) | 0.2086                                              |                                                      |                |
|                                                                                  |                        |                 |                                              |                 |                                                                                                                    |                                            |                                                          | R <sup>2</sup>                          | 0.9952                                              |                                                      |                |
| GC calibration                                                                   |                        | GC count        |                                              |                 | Ratio of sensitivity (toward N <sub>2</sub> )                                                                      |                                            | Feed gas measurement                                     |                                         |                                                     |                                                      |                |
| Timing                                                                           | No.                    | H <sub>2</sub>  | O <sub>2</sub>                               | N <sub>2</sub>  | H <sub>2</sub>                                                                                                     | O <sub>2</sub>                             |                                                          |                                         |                                                     |                                                      |                |
| Before reaction                                                                  | 1                      | 1642305         | 290013                                       | 259602          | 0.0909                                                                                                             | 0.0911                                     | 0.798                                                    | T <sub>a</sub> (°C)                     | 28.9                                                |                                                      |                |
|                                                                                  | 2                      | 1656860         | 292617                                       | 262272          | 0.0911                                                                                                             |                                            |                                                          | 0.799                                   | P <sub>0</sub> (hPa)                                | 1010.7                                               |                |
|                                                                                  | 3                      | 1701534         | 300764                                       | 269354          | 0.0911                                                                                                             |                                            |                                                          | 0.798                                   | Flow (cc/min)                                       |                                                      |                |
| After reaction                                                                   | 4                      | 1784037         | 315749                                       | 282850          | 0.0912                                                                                                             |                                            |                                                          | 0.798                                   | H <sub>2</sub>                                      | 13.52                                                |                |
|                                                                                  | 5                      | 1765872         | 312228                                       | 279688          | 0.0911                                                                                                             |                                            |                                                          | 0.798                                   | O <sub>2</sub>                                      | 20.94                                                |                |
|                                                                                  | 6                      | 1775987         | 314270                                       | 281791          | 0.0913                                                                                                             |                                            |                                                          | 0.799                                   | N <sub>2</sub>                                      | 23.50                                                |                |
| Time                                                                             |                        |                 |                                              | GC count        |                                                                                                                    |                                            | t <sub>correct</sub> (min)                               | Outlet flow (sccm)                      |                                                     | Conversion(%)                                        |                |
| H                                                                                | M                      | S               | min.                                         | H <sub>2</sub>  | O <sub>2</sub>                                                                                                     | N <sub>2</sub>                             |                                                          | H <sub>2</sub>                          | O <sub>2</sub>                                      | H <sub>2</sub>                                       | O <sub>2</sub> |
| 12                                                                               | 3                      | 40              | 4.0                                          | 416546          | 91162                                                                                                              | 310812                                     | 0.00                                                     | 4.47                                    | 12.79                                               | 61.85                                                | 29.53          |
| 12                                                                               | 13                     | 44              | 14.1                                         | 546709          | 168639                                                                                                             | 244777                                     | 8.80                                                     | 4.47                                    | 12.84                                               | 61.87                                                | 29.23          |
| 12                                                                               | 23                     | 46              | 24.1                                         | 561842          | 183280                                                                                                             | 234989                                     | 18.83                                                    | 4.47                                    | 12.91                                               | 61.89                                                | 28.89          |
| 12                                                                               | 33                     | 50              | 34.2                                         | 559653          | 185547                                                                                                             | 232751                                     | 28.90                                                    | 4.46                                    | 12.96                                               | 61.92                                                | 28.58          |
| 12                                                                               | 43                     | 52              | 44.2                                         | 561595          | 187388                                                                                                             | 233541                                     | 38.93                                                    | 4.46                                    | 13.05                                               | 61.92                                                | 28.12          |
| 12                                                                               | 53                     | 56              | 54.3                                         | 561208          | 188068                                                                                                             | 233643                                     | 49.00                                                    | 4.46                                    | 13.09                                               | 61.96                                                | 27.89          |
| 13                                                                               | 3                      | 58              | 64.3                                         | 561205          | 188727                                                                                                             | 233817                                     | 59.03                                                    | 4.45                                    | 13.12                                               | 61.99                                                | 27.69          |
| 13                                                                               | 14                     | 2               | 74.4                                         | 558370          | 188259                                                                                                             | 232725                                     | 69.10                                                    | 4.45                                    | 13.15                                               | 62.00                                                | 27.53          |
| 13                                                                               | 24                     | 4               | 84.4                                         | 555656          | 188065                                                                                                             | 232266                                     | 79.13                                                    | 4.44                                    | 13.16                                               | 62.11                                                | 27.46          |
| 13                                                                               | 34                     | 8               | 94.5                                         | 568634          | 192929                                                                                                             | 237333                                     | 89.20                                                    | 4.45                                    | 13.22                                               | 62.05                                                | 27.17          |
| 13                                                                               | 44                     | 10              | 104.5                                        | 567723          | 192972                                                                                                             | 236510                                     | 99.23                                                    | 4.45                                    | 13.27                                               | 61.98                                                | 26.90          |
| 13                                                                               | 54                     | 14              | 114.6                                        | 568379          | 193355                                                                                                             | 236955                                     | 109.30                                                   | 4.45                                    | 13.27                                               | 62.01                                                | 26.90          |
| 14                                                                               | 4                      | 16              | 124.6                                        | 564145          | 192196                                                                                                             | 235019                                     | 119.33                                                   | 4.45                                    | 13.30                                               | 61.98                                                | 26.74          |
| t <sub>correct</sub> (min)                                                       | Partial pressure (kPa) |                 | Rate (mmol L <sup>-1</sup> h <sup>-1</sup> ) |                 | d[H <sub>2</sub> O <sub>2</sub> ]/dt (mmol L <sup>-1</sup> h <sup>-1</sup> )                                       | Σ[H <sub>2</sub> ] (mmol L <sup>-1</sup> ) | [H <sub>2</sub> O <sub>2</sub> ] (mmol L <sup>-1</sup> ) | S <sub>e</sub> (—)                      | Σ <sub>2</sub> [H <sub>2</sub> O <sub>2</sub> ] (h) | Σ <sub>1</sub> /[H <sub>2</sub> O <sub>2</sub> ] (—) |                |
|                                                                                  | P <sub>H2</sub>        | P <sub>O2</sub> | r <sub>H2</sub>                              | r <sub>O2</sub> |                                                                                                                    |                                            |                                                          |                                         |                                                     |                                                      |                |
| 0.00                                                                             | 11.57                  | 33.09           | 64.71                                        | 47.85           | 31.00                                                                                                              | 0.00                                       | 0.00                                                     |                                         | 0.000                                               | 0.000                                                |                |
| 8.80                                                                             | 11.55                  | 33.19           | 64.73                                        | 47.37           | 30.00                                                                                                              | 9.49                                       | 4.47                                                     | 0.47                                    | 0.073                                               | 2.122                                                |                |
| 18.83                                                                            | 11.52                  | 33.30           | 64.75                                        | 46.81           | 28.87                                                                                                              | 20.32                                      | 9.40                                                     | 0.46                                    | 0.158                                               | 2.162                                                |                |
| 28.90                                                                            | 11.50                  | 33.39           | 64.78                                        | 46.31           | 27.85                                                                                                              | 31.19                                      | 14.15                                                    | 0.45                                    | 0.245                                               | 2.203                                                |                |
| 38.93                                                                            | 11.47                  | 33.54           | 64.78                                        | 45.56           | 26.35                                                                                                              | 42.02                                      | 18.69                                                    | 0.44                                    | 0.332                                               | 2.249                                                |                |
| 49.00                                                                            | 11.45                  | 33.61           | 64.82                                        | 45.19           | 25.56                                                                                                              | 52.89                                      | 23.04                                                    | 0.44                                    | 0.421                                               | 2.296                                                |                |
| 59.03                                                                            | 11.43                  | 33.68           | 64.85                                        | 44.87           | 24.88                                                                                                              | 63.73                                      | 27.26                                                    | 0.43                                    | 0.511                                               | 2.338                                                |                |
| 69.10                                                                            | 11.42                  | 33.73           | 64.87                                        | 44.61           | 24.35                                                                                                              | 74.61                                      | 31.39                                                    | 0.42                                    | 0.600                                               | 2.377                                                |                |
| 79.13                                                                            | 11.38                  | 33.76           | 64.98                                        | 44.50           | 24.02                                                                                                              | 85.47                                      | 35.43                                                    | 0.41                                    | 0.689                                               | 2.412                                                |                |
| 89.20                                                                            | 11.38                  | 33.84           | 64.92                                        | 44.03           | 23.14                                                                                                              | 96.37                                      | 39.39                                                    | 0.41                                    | 0.779                                               | 2.447                                                |                |
| 99.23                                                                            | 11.39                  | 33.91           | 64.85                                        | 43.60           | 22.34                                                                                                              | 107.22                                     | 43.19                                                    | 0.40                                    | 0.871                                               | 2.482                                                |                |
| 109.30                                                                           | 11.38                  | 33.92           | 64.88                                        | 43.58           | 22.29                                                                                                              | 118.10                                     | 46.94                                                    | 0.40                                    | 0.962                                               | 2.516                                                |                |
| 119.33                                                                           | 11.38                  | 33.97           | 64.85                                        | 43.32           | 21.80                                                                                                              | 128.95                                     | 50.62                                                    | 0.39                                    | 1.053                                               | 2.547                                                |                |



## H<sub>2</sub>O<sub>2</sub> Synthesis Data Sheet

Entry No. 48 (Exp. T344) Employed in: Fig 6

| Catalyst, Additives                                                              |                        |                 | Reaction conditions                          |                 | Gas feed rate (sccm)                                                                                               |                                            |                                                          |                                                          |                                                     |                                                      |                |
|----------------------------------------------------------------------------------|------------------------|-----------------|----------------------------------------------|-----------------|--------------------------------------------------------------------------------------------------------------------|--------------------------------------------|----------------------------------------------------------|----------------------------------------------------------|-----------------------------------------------------|------------------------------------------------------|----------------|
| Name                                                                             | Conc.                  | (Unit)          | T <sub>0</sub> (°C)                          | 26.2            |                                                                                                                    | H <sub>2</sub>                             | O <sub>2</sub>                                           | N <sub>2</sub>                                           | Sum                                                 |                                                      |                |
| Pd-PVP                                                                           | 8.31                   | (mg/L)          | T (°C)                                       | 30.1            | Set                                                                                                                | 12.50                                      | 20.00                                                    | 17.50                                                    | 50.00                                               |                                                      |                |
| Pt(NH <sub>3</sub> ) <sub>4</sub> (NO <sub>3</sub> ) <sub>2</sub>                | 0.0833                 | (mg-Pt/L)       | P <sub>0</sub> (hPa)                         | 1008.8          | Calibrated                                                                                                         | 12.79                                      | 18.34                                                    | 17.59                                                    | 48.72                                               |                                                      |                |
| H <sub>2</sub> SO <sub>4</sub>                                                   | 0.01                   | (N)             | P (hPa)                                      | 1014.4          | Determination of final [H <sub>2</sub> O <sub>2</sub> ]                                                            | Sample (g)                                 | Absorbance (—)                                           | [H <sub>2</sub> O <sub>2</sub> ] (mmol L <sup>-1</sup> ) |                                                     |                                                      |                |
| NaBr                                                                             | 0.001                  | (N)             | Agitation (rpm)                              | 1201            |                                                                                                                    |                                            |                                                          |                                                          | 0.615                                               | 1.009                                                | 56.55          |
| Comment:<br>Catalyst activation: H <sub>2</sub> gas 20 sccm at 303 K for 40 min. |                        |                 |                                              |                 | Analysis of H <sub>2</sub> O <sub>2</sub> formation selectivity and H <sub>2</sub> O <sub>2</sub> destruction rate |                                            |                                                          | S <sub>f</sub> (—)                                       | 0.4603                                              |                                                      |                |
|                                                                                  |                        |                 |                                              |                 |                                                                                                                    |                                            |                                                          | k <sub>d</sub> [Cat] (h <sup>-1</sup> )                  | 0.1905                                              |                                                      |                |
|                                                                                  |                        |                 |                                              |                 |                                                                                                                    |                                            |                                                          | R <sup>2</sup>                                           | 0.9952                                              |                                                      |                |
| GC calibration                                                                   |                        | GC count        |                                              |                 | Ratio of sensitivity (toward N <sub>2</sub> )                                                                      |                                            | Feed gas measurement                                     |                                                          |                                                     |                                                      |                |
| Timing                                                                           | No.                    | H <sub>2</sub>  | O <sub>2</sub>                               | N <sub>2</sub>  | H <sub>2</sub>                                                                                                     | O <sub>2</sub>                             |                                                          |                                                          |                                                     |                                                      |                |
| Before reaction                                                                  | 1                      | 1976983         | 324001                                       | 253515          | 0.0932                                                                                                             | 0.0932                                     | 0.815                                                    | T <sub>a</sub> (°C)                                      | 26.4                                                |                                                      |                |
|                                                                                  | 2                      | 1968563         | 322537                                       | 252302          | 0.0932                                                                                                             |                                            |                                                          | P <sub>0</sub> (hPa)                                     | 1008.2                                              |                                                      |                |
|                                                                                  | 3                      | 1982471         | 324948                                       | 254238          | 0.0932                                                                                                             |                                            |                                                          | Flow (cc/min)                                            |                                                     |                                                      |                |
| After reaction                                                                   | 4                      | 2032745         | 333346                                       | 260757          | 0.0933                                                                                                             |                                            |                                                          | H <sub>2</sub>                                           | 14.59                                               |                                                      |                |
|                                                                                  | 5                      | 2030091         | 333055                                       | 260547          | 0.0933                                                                                                             |                                            |                                                          | O <sub>2</sub>                                           | 20.92                                               |                                                      |                |
|                                                                                  | 6                      | 2043251         | 335302                                       | 262256          | 0.0933                                                                                                             |                                            |                                                          | N <sub>2</sub>                                           | 20.07                                               |                                                      |                |
| Time                                                                             |                        |                 |                                              | GC count        |                                                                                                                    |                                            | t <sub>correct</sub> (min)                               | Outlet flow (sccm)                                       |                                                     | Conversion(%)                                        |                |
| H                                                                                | M                      | S               | min.                                         | H <sub>2</sub>  | O <sub>2</sub>                                                                                                     | N <sub>2</sub>                             |                                                          | H <sub>2</sub>                                           | O <sub>2</sub>                                      | H <sub>2</sub>                                       | O <sub>2</sub> |
| 16                                                                               | 11                     | 56              | 4.0                                          | 473758          | 96064                                                                                                              | 328466                                     | 0.00                                                     | 4.36                                                     | 12.17                                               | 65.92                                                | 33.63          |
| 16                                                                               | 22                     | 0               | 14.1                                         | 616422          | 183746                                                                                                             | 251104                                     | 8.27                                                     | 4.36                                                     | 12.23                                               | 65.89                                                | 33.32          |
| 16                                                                               | 32                     | 2               | 24.1                                         | 623295          | 199784                                                                                                             | 238796                                     | 18.30                                                    | 4.36                                                     | 12.30                                               | 65.87                                                | 32.95          |
| 16                                                                               | 42                     | 6               | 34.2                                         | 631517          | 204342                                                                                                             | 237218                                     | 28.37                                                    | 4.37                                                     | 12.36                                               | 65.85                                                | 32.61          |
| 16                                                                               | 52                     | 8               | 44.2                                         | 629781          | 204992                                                                                                             | 236200                                     | 38.40                                                    | 4.37                                                     | 12.45                                               | 65.80                                                | 32.11          |
| 17                                                                               | 2                      | 12              | 54.3                                         | 629849          | 205784                                                                                                             | 236232                                     | 48.47                                                    | 4.37                                                     | 12.50                                               | 65.80                                                | 31.85          |
| 17                                                                               | 12                     | 14              | 64.3                                         | 628114          | 205902                                                                                                             | 235660                                     | 58.50                                                    | 4.37                                                     | 12.53                                               | 65.81                                                | 31.65          |
| 17                                                                               | 22                     | 18              | 74.4                                         | 630171          | 206893                                                                                                             | 236047                                     | 68.57                                                    | 4.38                                                     | 12.57                                               | 65.76                                                | 31.43          |
| 17                                                                               | 32                     | 20              | 84.4                                         | 619946          | 203917                                                                                                             | 232213                                     | 78.60                                                    | 4.38                                                     | 12.60                                               | 65.76                                                | 31.30          |
| 17                                                                               | 42                     | 24              | 94.5                                         | 627909          | 208345                                                                                                             | 236671                                     | 88.67                                                    | 4.35                                                     | 12.63                                               | 65.97                                                | 31.13          |
| 17                                                                               | 52                     | 26              | 104.5                                        | 630227          | 208521                                                                                                             | 235965                                     | 98.70                                                    | 4.38                                                     | 12.68                                               | 65.74                                                | 30.87          |
| 18                                                                               | 2                      | 30              | 114.6                                        | 629390          | 209131                                                                                                             | 236241                                     | 108.77                                                   | 4.37                                                     | 12.70                                               | 65.83                                                | 30.75          |
| 18                                                                               | 12                     | 32              | 124.6                                        | 629643          | 209740                                                                                                             | 236418                                     | 118.80                                                   | 4.37                                                     | 12.73                                               | 65.84                                                | 30.60          |
| t <sub>correct</sub> (min)                                                       | Partial pressure (kPa) |                 | Rate (mmol L <sup>-1</sup> h <sup>-1</sup> ) |                 | d[H <sub>2</sub> O <sub>2</sub> ]/dt (mmol L <sup>-1</sup> h <sup>-1</sup> )                                       | Σ[H <sub>2</sub> ] (mmol L <sup>-1</sup> ) | [H <sub>2</sub> O <sub>2</sub> ] (mmol L <sup>-1</sup> ) | S <sub>e</sub> (—)                                       | Σ <sub>2</sub> [H <sub>2</sub> O <sub>2</sub> ] (h) | Σ <sub>1</sub> /[H <sub>2</sub> O <sub>2</sub> ] (—) |                |
|                                                                                  | P <sub>H2</sub>        | P <sub>O2</sub> | r <sub>H2</sub>                              | r <sub>O2</sub> |                                                                                                                    |                                            |                                                          |                                                          |                                                     |                                                      |                |
| 0.00                                                                             | 12.42                  | 34.67           | 75.27                                        | 55.06           | 34.86                                                                                                              | 0.00                                       | 0.00                                                     |                                                          | 0.000                                               | 0.000                                                |                |
| 8.27                                                                             | 12.40                  | 34.77           | 75.24                                        | 54.56           | 33.87                                                                                                              | 10.37                                      | 4.74                                                     | 0.46                                                     | 0.069                                               | 2.190                                                |                |
| 18.30                                                                            | 12.39                  | 34.89           | 75.21                                        | 53.94           | 32.67                                                                                                              | 22.95                                      | 10.30                                                    | 0.45                                                     | 0.154                                               | 2.228                                                |                |
| 28.37                                                                            | 12.37                  | 35.00           | 75.19                                        | 53.40           | 31.60                                                                                                              | 35.57                                      | 15.69                                                    | 0.44                                                     | 0.240                                               | 2.267                                                |                |
| 38.40                                                                            | 12.35                  | 35.16           | 75.13                                        | 52.57           | 30.00                                                                                                              | 48.14                                      | 20.84                                                    | 0.43                                                     | 0.327                                               | 2.310                                                |                |
| 48.47                                                                            | 12.34                  | 35.25           | 75.14                                        | 52.15           | 29.17                                                                                                              | 60.74                                      | 25.81                                                    | 0.42                                                     | 0.416                                               | 2.354                                                |                |
| 58.50                                                                            | 12.32                  | 35.32           | 75.15                                        | 51.82           | 28.49                                                                                                              | 73.31                                      | 30.63                                                    | 0.42                                                     | 0.504                                               | 2.394                                                |                |
| 68.57                                                                            | 12.32                  | 35.38           | 75.08                                        | 51.46           | 27.84                                                                                                              | 85.91                                      | 35.35                                                    | 0.41                                                     | 0.594                                               | 2.430                                                |                |
| 78.60                                                                            | 12.31                  | 35.42           | 75.08                                        | 51.25           | 27.42                                                                                                              | 98.47                                      | 39.97                                                    | 0.41                                                     | 0.683                                               | 2.463                                                |                |
| 88.67                                                                            | 12.24                  | 35.51           | 75.33                                        | 50.97           | 26.62                                                                                                              | 111.09                                     | 44.51                                                    | 0.40                                                     | 0.772                                               | 2.496                                                |                |
| 98.70                                                                            | 12.29                  | 35.56           | 75.07                                        | 50.54           | 26.01                                                                                                              | 123.66                                     | 48.91                                                    | 0.40                                                     | 0.862                                               | 2.529                                                |                |
| 108.77                                                                           | 12.26                  | 35.61           | 75.17                                        | 50.34           | 25.52                                                                                                              | 136.26                                     | 53.23                                                    | 0.39                                                     | 0.953                                               | 2.560                                                |                |
| 118.80                                                                           | 12.24                  | 35.66           | 75.18                                        | 50.10           | 25.02                                                                                                              | 148.83                                     | 57.46                                                    | 0.39                                                     | 1.044                                               | 2.590                                                |                |

## H<sub>2</sub>O<sub>2</sub> Synthesis Data Sheet

Entry No. 49 (Exp. T345) Employed in: Fig 6

| Catalyst, Additives                                                              |                        |                 | Reaction conditions                          |                 | Gas feed rate (sccm)                                                                                               |                                            |                                                          |                                                          |                                                     |                                                      |                |
|----------------------------------------------------------------------------------|------------------------|-----------------|----------------------------------------------|-----------------|--------------------------------------------------------------------------------------------------------------------|--------------------------------------------|----------------------------------------------------------|----------------------------------------------------------|-----------------------------------------------------|------------------------------------------------------|----------------|
| Name                                                                             | Conc.                  | (Unit)          | T <sub>0</sub> (°C)                          | 27.4            |                                                                                                                    | H <sub>2</sub>                             | O <sub>2</sub>                                           | N <sub>2</sub>                                           | Sum                                                 |                                                      |                |
| Pd-PVP                                                                           | 8.31                   | (mg/L)          | T (°C)                                       | 30.4            | Set                                                                                                                | 13.00                                      | 20.00                                                    | 17.00                                                    | 50.00                                               |                                                      |                |
| Pt(NH <sub>3</sub> ) <sub>4</sub> (NO <sub>3</sub> ) <sub>2</sub>                | 0.0833                 | (mg-Pt/L)       | P <sub>0</sub> (hPa)                         | 1006.3          | Calibrated                                                                                                         | 13.14                                      | 18.27                                                    | 16.97                                                    | 48.38                                               |                                                      |                |
| H <sub>2</sub> SO <sub>4</sub>                                                   | 0.01                   | (N)             | P (hPa)                                      | 1011.8          | Determination of final [H <sub>2</sub> O <sub>2</sub> ]                                                            | Sample (g)                                 | Absorbance (—)                                           | [H <sub>2</sub> O <sub>2</sub> ] (mmol L <sup>-1</sup> ) |                                                     |                                                      |                |
| NaBr                                                                             | 0.001                  | (N)             | Agitation (rpm)                              | 1201            |                                                                                                                    |                                            |                                                          |                                                          | 0.675                                               | 1.116                                                | 56.99          |
| Comment:<br>Catalyst activation: H <sub>2</sub> gas 20 sccm at 303 K for 40 min. |                        |                 |                                              |                 | Analysis of H <sub>2</sub> O <sub>2</sub> formation selectivity and H <sub>2</sub> O <sub>2</sub> destruction rate |                                            |                                                          | S <sub>f</sub> (—)                                       | 0.4995                                              |                                                      |                |
|                                                                                  |                        |                 |                                              |                 |                                                                                                                    |                                            |                                                          | k <sub>d</sub> [Cat] (h <sup>-1</sup> )                  | 0.2942                                              |                                                      |                |
|                                                                                  |                        |                 |                                              |                 |                                                                                                                    |                                            |                                                          | R <sup>2</sup>                                           | 0.9844                                              |                                                      |                |
| GC calibration                                                                   |                        | GC count        |                                              |                 | Ratio of sensitivity (toward N <sub>2</sub> )                                                                      |                                            | Feed gas measurement                                     |                                                          |                                                     |                                                      |                |
| Timing                                                                           | No.                    | H <sub>2</sub>  | O <sub>2</sub>                               | N <sub>2</sub>  | H <sub>2</sub>                                                                                                     | O <sub>2</sub>                             |                                                          |                                                          |                                                     |                                                      |                |
| Before reaction                                                                  | 1                      | 2129216         | 337899                                       | 257181          | 0.0936                                                                                                             | 0.0936                                     | 0.819                                                    | T <sub>a</sub> (°C)                                      | 27.0                                                |                                                      |                |
|                                                                                  | 2                      | 2150274         | 341329                                       | 259796          | 0.0936                                                                                                             |                                            |                                                          | 0.819                                                    | P <sub>0</sub> (hPa)                                | 1007.2                                               |                |
|                                                                                  | 3                      | 2169294         | 344310                                       | 262222          | 0.0936                                                                                                             |                                            |                                                          | 0.820                                                    | Flow (cc/min)                                       |                                                      |                |
| After reaction                                                                   | 4                      | 2243107         | 356453                                       | 271196          | 0.0937                                                                                                             |                                            |                                                          | 0.819                                                    | H <sub>2</sub>                                      | 15.06                                                |                |
|                                                                                  | 5                      | 2236406         | 355395                                       | 270494          | 0.0937                                                                                                             |                                            |                                                          | 0.819                                                    | O <sub>2</sub>                                      | 20.93                                                |                |
|                                                                                  | 6                      | 2233321         | 354973                                       | 270187          | 0.0937                                                                                                             |                                            |                                                          | 0.819                                                    | N <sub>2</sub>                                      | 19.44                                                |                |
| Time                                                                             |                        |                 |                                              | GC count        |                                                                                                                    |                                            | t <sub>correct</sub> (min)                               | Outlet flow (sccm)                                       |                                                     | Conversion(%)                                        |                |
| H                                                                                | M                      | S               | min.                                         | H <sub>2</sub>  | O <sub>2</sub>                                                                                                     | N <sub>2</sub>                             |                                                          | H <sub>2</sub>                                           | O <sub>2</sub>                                      | H <sub>2</sub>                                       | O <sub>2</sub> |
| 15                                                                               | 42                     | 54              | 4.0                                          | 530777          | 99343                                                                                                              | 340481                                     | 0.00                                                     | 4.40                                                     | 11.68                                               | 66.52                                                | 36.09          |
| 15                                                                               | 52                     | 56              | 14.0                                         | 772016          | 187732                                                                                                             | 249895                                     | 8.10                                                     | 4.41                                                     | 11.78                                               | 66.48                                                | 35.53          |
| 16                                                                               | 2                      | 58              | 24.1                                         | 780305          | 203612                                                                                                             | 237386                                     | 18.13                                                    | 4.41                                                     | 11.91                                               | 66.42                                                | 34.82          |
| 16                                                                               | 13                     | 2               | 34.1                                         | 675251          | 209335                                                                                                             | 242167                                     | 28.20                                                    | 4.43                                                     | 12.02                                               | 66.29                                                | 34.20          |
| 16                                                                               | 23                     | 4               | 44.2                                         | 668366          | 211286                                                                                                             | 240806                                     | 38.23                                                    | 4.41                                                     | 12.20                                               | 66.45                                                | 33.22          |
| 16                                                                               | 33                     | 8               | 54.2                                         | 670080          | 211546                                                                                                             | 239499                                     | 48.30                                                    | 4.45                                                     | 12.28                                               | 66.18                                                | 32.77          |
| 16                                                                               | 43                     | 10              | 64.3                                         | 669020          | 211779                                                                                                             | 238924                                     | 58.33                                                    | 4.45                                                     | 12.32                                               | 66.15                                                | 32.53          |
| 16                                                                               | 53                     | 14              | 74.3                                         | 669787          | 212251                                                                                                             | 238904                                     | 68.40                                                    | 4.45                                                     | 12.35                                               | 66.11                                                | 32.38          |
| 17                                                                               | 3                      | 16              | 84.4                                         | 669417          | 212656                                                                                                             | 238488                                     | 78.43                                                    | 4.46                                                     | 12.40                                               | 66.07                                                | 32.13          |
| 17                                                                               | 13                     | 20              | 94.4                                         | 671063          | 213346                                                                                                             | 238602                                     | 88.50                                                    | 4.47                                                     | 12.43                                               | 66.00                                                | 31.94          |
| 17                                                                               | 23                     | 22              | 104.5                                        | 670574          | 213580                                                                                                             | 238245                                     | 98.53                                                    | 4.47                                                     | 12.46                                               | 65.97                                                | 31.76          |
| 17                                                                               | 33                     | 26              | 114.5                                        | 671523          | 214367                                                                                                             | 238548                                     | 108.60                                                   | 4.47                                                     | 12.49                                               | 65.97                                                | 31.60          |
| 17                                                                               | 43                     | 28              | 124.6                                        | 670490          | 214344                                                                                                             | 237722                                     | 118.63                                                   | 4.48                                                     | 12.54                                               | 65.90                                                | 31.37          |
| t <sub>correct</sub> (min)                                                       | Partial pressure (kPa) |                 | Rate (mmol L <sup>-1</sup> h <sup>-1</sup> ) |                 | d[H <sub>2</sub> O <sub>2</sub> ]/dt (mmol L <sup>-1</sup> h <sup>-1</sup> )                                       | Σ[H <sub>2</sub> ] (mmol L <sup>-1</sup> ) | [H <sub>2</sub> O <sub>2</sub> ] (mmol L <sup>-1</sup> ) | S <sub>e</sub> (—)                                       | Σ <sub>2</sub> [H <sub>2</sub> O <sub>2</sub> ] (h) | Σ <sub>1</sub> /[H <sub>2</sub> O <sub>2</sub> ] (—) |                |
|                                                                                  | P <sub>H2</sub>        | P <sub>O2</sub> | r <sub>H2</sub>                              | r <sub>O2</sub> |                                                                                                                    |                                            |                                                          |                                                          |                                                     |                                                      |                |
| 0.00                                                                             | 12.91                  | 34.25           | 78.07                                        | 58.86           | 39.66                                                                                                              | 0.00                                       | 0.00                                                     |                                                          | 0.000                                               | 0.000                                                |                |
| 8.10                                                                             | 12.88                  | 34.44           | 78.01                                        | 57.94           | 37.87                                                                                                              | 10.53                                      | 5.23                                                     | 0.50                                                     | 0.067                                               | 2.013                                                |                |
| 18.13                                                                            | 12.85                  | 34.67           | 77.95                                        | 56.80           | 35.65                                                                                                              | 23.57                                      | 11.38                                                    | 0.48                                                     | 0.153                                               | 2.072                                                |                |
| 28.20                                                                            | 12.85                  | 34.87           | 77.80                                        | 55.79           | 33.78                                                                                                              | 36.64                                      | 17.20                                                    | 0.47                                                     | 0.241                                               | 2.130                                                |                |
| 38.23                                                                            | 12.73                  | 35.22           | 77.98                                        | 54.18           | 30.37                                                                                                              | 49.66                                      | 22.57                                                    | 0.45                                                     | 0.331                                               | 2.201                                                |                |
| 48.30                                                                            | 12.79                  | 35.33           | 77.67                                        | 53.45           | 29.23                                                                                                              | 62.72                                      | 27.56                                                    | 0.44                                                     | 0.423                                               | 2.275                                                |                |
| 58.33                                                                            | 12.78                  | 35.41           | 77.63                                        | 53.06           | 28.49                                                                                                              | 75.71                                      | 32.39                                                    | 0.43                                                     | 0.515                                               | 2.337                                                |                |
| 68.40                                                                            | 12.79                  | 35.46           | 77.58                                        | 52.81           | 28.03                                                                                                              | 88.73                                      | 37.13                                                    | 0.42                                                     | 0.606                                               | 2.389                                                |                |
| 78.43                                                                            | 12.78                  | 35.53           | 77.54                                        | 52.40           | 27.27                                                                                                              | 101.70                                     | 41.76                                                    | 0.41                                                     | 0.697                                               | 2.436                                                |                |
| 88.50                                                                            | 12.79                  | 35.59           | 77.46                                        | 52.10           | 26.74                                                                                                              | 114.70                                     | 46.29                                                    | 0.40                                                     | 0.788                                               | 2.478                                                |                |
| 98.53                                                                            | 12.79                  | 35.64           | 77.43                                        | 51.81           | 26.19                                                                                                              | 127.65                                     | 50.71                                                    | 0.40                                                     | 0.880                                               | 2.517                                                |                |
| 108.60                                                                           | 12.78                  | 35.70           | 77.42                                        | 51.54           | 25.66                                                                                                              | 140.64                                     | 55.06                                                    | 0.39                                                     | 0.971                                               | 2.554                                                |                |
| 118.63                                                                           | 12.78                  | 35.76           | 77.34                                        | 51.17           | 24.99                                                                                                              | 153.58                                     | 59.30                                                    | 0.39                                                     | 1.063                                               | 2.590                                                |                |

## H<sub>2</sub>O<sub>2</sub> Synthesis Data Sheet

Entry No. 50 (Exp. T339) Employed in: Fig. 6

| Catalyst, Additives                                                              |                        |                 | Reaction conditions                          |                 | Gas feed rate (sccm)                                                                                               |                                            |                                                          |                                                          |                                                     |                                                      |                |
|----------------------------------------------------------------------------------|------------------------|-----------------|----------------------------------------------|-----------------|--------------------------------------------------------------------------------------------------------------------|--------------------------------------------|----------------------------------------------------------|----------------------------------------------------------|-----------------------------------------------------|------------------------------------------------------|----------------|
| Name                                                                             | Conc.                  | (Unit)          | T <sub>0</sub> (°C)                          | 26.6            |                                                                                                                    | H <sub>2</sub>                             | O <sub>2</sub>                                           | N <sub>2</sub>                                           | Sum                                                 |                                                      |                |
| Pd-PVP                                                                           | 8.31                   | (mg/L)          | T (°C)                                       | 30.1            | Set                                                                                                                | 17.50                                      | 25.00                                                    | 15.00                                                    | 57.50                                               |                                                      |                |
| Pt(NH <sub>3</sub> ) <sub>4</sub> (NO <sub>3</sub> ) <sub>2</sub>                | 0.0833                 | (mg-Pt/L)       | P <sub>0</sub> (hPa)                         | 1007.0          | Calibrated                                                                                                         | 17.66                                      | 22.90                                                    | 15.13                                                    | 55.69                                               |                                                      |                |
| H <sub>2</sub> SO <sub>4</sub>                                                   | 0.01                   | (N)             | P (hPa)                                      | 1013.4          | Determination of final [H <sub>2</sub> O <sub>2</sub> ]                                                            | Sample (g)                                 | Absorbance (—)                                           | [H <sub>2</sub> O <sub>2</sub> ] (mmol L <sup>-1</sup> ) |                                                     |                                                      |                |
| NaBr                                                                             | 0.001                  | (N)             | Agitation (rpm)                              | 1200            |                                                                                                                    |                                            |                                                          |                                                          |                                                     | 0.945                                                | 2.097          |
| Comment:<br>Catalyst activation: H <sub>2</sub> gas 20 sccm at 303 K for 40 min. |                        |                 |                                              |                 | Analysis of H <sub>2</sub> O <sub>2</sub> formation selectivity and H <sub>2</sub> O <sub>2</sub> destruction rate |                                            |                                                          | S <sub>f</sub> (—)                                       | 0.7253                                              |                                                      |                |
|                                                                                  |                        |                 |                                              |                 |                                                                                                                    |                                            |                                                          | k <sub>a</sub> [Cat] (h <sup>-1</sup> )                  | 0.5998                                              |                                                      |                |
|                                                                                  |                        |                 |                                              |                 |                                                                                                                    |                                            |                                                          | R <sup>2</sup>                                           | 0.9985                                              |                                                      |                |
| GC calibration                                                                   |                        | GC count        |                                              |                 | Ratio of sensitivity (toward N <sub>2</sub> )                                                                      |                                            | Feed gas measurement                                     |                                                          |                                                     |                                                      |                |
| Timing                                                                           | No.                    | H <sub>2</sub>  | O <sub>2</sub>                               | N <sub>2</sub>  | H <sub>2</sub>                                                                                                     | O <sub>2</sub>                             |                                                          |                                                          |                                                     |                                                      |                |
| Before reaction                                                                  | 1                      | 2343829         | 351362                                       | 189669          | 0.0944                                                                                                             | 0.0944                                     | 0.816                                                    | T <sub>a</sub> (°C)                                      | 26.3                                                |                                                      |                |
|                                                                                  | 2                      | 2353212         | 352581                                       | 190176          | 0.0943                                                                                                             |                                            |                                                          | 0.816                                                    | P <sub>0</sub> (hPa)                                | 1007.4                                               |                |
|                                                                                  | 3                      | 2360035         | 353571                                       | 190716          | 0.0943                                                                                                             |                                            |                                                          | 0.816                                                    | Flow (cc/min)                                       |                                                      |                |
| After reaction                                                                   | 4                      | 2403767         | 360302                                       | 194451          | 0.0944                                                                                                             |                                            |                                                          | 0.816                                                    | H <sub>2</sub>                                      | 20.15                                                |                |
|                                                                                  | 5                      | 2425923         | 363831                                       | 196140          | 0.0943                                                                                                             |                                            |                                                          | 0.816                                                    | O <sub>2</sub>                                      | 26.13                                                |                |
|                                                                                  | 6                      | 2407572         | 360993                                       | 194782          | 0.0944                                                                                                             |                                            |                                                          | 0.816                                                    | N <sub>2</sub>                                      | 17.27                                                |                |
| Time                                                                             |                        |                 |                                              | GC count        |                                                                                                                    |                                            | t <sub>correct</sub> (min)                               | Outlet flow (sccm)                                       |                                                     | Conversion(%)                                        |                |
| H                                                                                | M                      | S               | min.                                         | H <sub>2</sub>  | O <sub>2</sub>                                                                                                     | N <sub>2</sub>                             |                                                          | H <sub>2</sub>                                           | O <sub>2</sub>                                      | H <sub>2</sub>                                       | O <sub>2</sub> |
| 16                                                                               | 12                     | 50              | 4.0                                          | 667526          | 106474                                                                                                             | 278606                                     | 0.00                                                     | 8.33                                                     | 14.90                                               | 52.82                                                | 34.92          |
| 16                                                                               | 22                     | 54              | 14.1                                         | 943708          | 192795                                                                                                             | 186853                                     | 8.87                                                     | 8.18                                                     | 15.01                                               | 53.66                                                | 34.43          |
| 16                                                                               | 32                     | 56              | 24.1                                         | 944564          | 205673                                                                                                             | 172663                                     | 18.90                                                    | 8.01                                                     | 15.14                                               | 54.61                                                | 33.88          |
| 16                                                                               | 43                     | 0               | 34.2                                         | 933038          | 209719                                                                                                             | 169875                                     | 28.97                                                    | 7.84                                                     | 15.25                                               | 55.58                                                | 33.40          |
| 16                                                                               | 53                     | 2               | 44.2                                         | 936861          | 217233                                                                                                             | 174045                                     | 39.00                                                    | 7.69                                                     | 15.42                                               | 56.47                                                | 32.66          |
| 17                                                                               | 3                      | 6               | 54.3                                         | 898892          | 214509                                                                                                             | 170947                                     | 49.07                                                    | 7.51                                                     | 15.50                                               | 57.48                                                | 32.30          |
| 17                                                                               | 13                     | 8               | 64.3                                         | 881818          | 217421                                                                                                             | 172862                                     | 59.10                                                    | 7.28                                                     | 15.54                                               | 58.75                                                | 32.14          |
| 17                                                                               | 23                     | 12              | 74.4                                         | 774595          | 219503                                                                                                             | 180359                                     | 69.17                                                    | 6.13                                                     | 15.03                                               | 65.27                                                | 34.34          |
| 17                                                                               | 33                     | 14              | 84.4                                         | 784514          | 223412                                                                                                             | 182395                                     | 79.20                                                    | 6.14                                                     | 15.13                                               | 65.22                                                | 33.92          |
| 17                                                                               | 43                     | 18              | 94.5                                         | 782084          | 221277                                                                                                             | 179090                                     | 89.27                                                    | 6.24                                                     | 15.26                                               | 64.69                                                | 33.34          |
| 17                                                                               | 53                     | 20              | 104.5                                        | 793831          | 225358                                                                                                             | 181421                                     | 99.30                                                    | 6.25                                                     | 15.35                                               | 64.62                                                | 32.99          |
| 18                                                                               | 3                      | 24              | 114.6                                        | 795234          | 224385                                                                                                             | 179468                                     | 109.37                                                   | 6.33                                                     | 15.45                                               | 64.17                                                | 32.55          |
| 18                                                                               | 13                     | 26              | 124.6                                        | 805216          | 227929                                                                                                             | 181349                                     | 119.40                                                   | 6.34                                                     | 15.53                                               | 64.09                                                | 32.19          |
| t <sub>correct</sub> (min)                                                       | Partial pressure (kPa) |                 | Rate (mmol L <sup>-1</sup> h <sup>-1</sup> ) |                 | d[H <sub>2</sub> O <sub>2</sub> ]/dt (mmol L <sup>-1</sup> h <sup>-1</sup> )                                       | Σ[H <sub>2</sub> ] (mmol L <sup>-1</sup> ) | [H <sub>2</sub> O <sub>2</sub> ] (mmol L <sup>-1</sup> ) | S <sub>e</sub> (—)                                       | Σ <sub>2</sub> [H <sub>2</sub> O <sub>2</sub> ] (h) | Σ <sub>1</sub> /[H <sub>2</sub> O <sub>2</sub> ] (—) |                |
|                                                                                  | P <sub>H2</sub>        | P <sub>O2</sub> | r <sub>H2</sub>                              | r <sub>O2</sub> |                                                                                                                    |                                            |                                                          |                                                          |                                                     |                                                      |                |
| 0.00                                                                             | 21.08                  | 37.71           | 83.27                                        | 71.39           | 59.51                                                                                                              | 0.00                                       | 0.00                                                     |                                                          | 0.000                                               | 0.000                                                |                |
| 8.87                                                                             | 20.73                  | 38.03           | 84.60                                        | 70.40           | 56.20                                                                                                              | 12.41                                      | 8.55                                                     | 0.69                                                     | 0.074                                               | 1.451                                                |                |
| 18.90                                                                            | 20.32                  | 38.39           | 86.10                                        | 69.28           | 52.45                                                                                                              | 26.68                                      | 17.64                                                    | 0.66                                                     | 0.160                                               | 1.513                                                |                |
| 28.97                                                                            | 19.92                  | 38.74           | 87.63                                        | 68.28           | 48.93                                                                                                              | 41.25                                      | 26.14                                                    | 0.63                                                     | 0.248                                               | 1.578                                                |                |
| 39.00                                                                            | 19.52                  | 39.15           | 89.03                                        | 66.78           | 44.53                                                                                                              | 56.02                                      | 33.95                                                    | 0.61                                                     | 0.339                                               | 1.650                                                |                |
| 49.07                                                                            | 19.11                  | 39.46           | 90.62                                        | 66.04           | 41.47                                                                                                              | 71.09                                      | 41.17                                                    | 0.58                                                     | 0.433                                               | 1.727                                                |                |
| 59.10                                                                            | 18.63                  | 39.75           | 92.62                                        | 65.72           | 38.82                                                                                                              | 86.41                                      | 47.88                                                    | 0.55                                                     | 0.528                                               | 1.805                                                |                |
| 69.17                                                                            | 16.40                  | 40.20           | 102.90                                       | 70.21           | 37.52                                                                                                              | 102.82                                     | 54.28                                                    | 0.53                                                     | 0.623                                               | 1.894                                                |                |
| 79.20                                                                            | 16.37                  | 40.34           | 102.82                                       | 69.35           | 35.87                                                                                                              | 120.02                                     | 60.42                                                    | 0.50                                                     | 0.719                                               | 1.986                                                |                |
| 89.27                                                                            | 16.52                  | 40.44           | 101.98                                       | 68.17           | 34.35                                                                                                              | 137.20                                     | 66.31                                                    | 0.48                                                     | 0.815                                               | 2.069                                                |                |
| 99.30                                                                            | 16.51                  | 40.56           | 101.87                                       | 67.44           | 33.00                                                                                                              | 154.24                                     | 71.94                                                    | 0.47                                                     | 0.912                                               | 2.144                                                |                |
| 109.37                                                                           | 16.64                  | 40.62           | 101.16                                       | 66.54           | 31.92                                                                                                              | 171.27                                     | 77.39                                                    | 0.45                                                     | 1.010                                               | 2.213                                                |                |
| 119.40                                                                           | 16.63                  | 40.73           | 101.05                                       | 65.82           | 30.59                                                                                                              | 188.18                                     | 82.62                                                    | 0.44                                                     | 1.108                                               | 2.278                                                |                |

## H<sub>2</sub>O<sub>2</sub> Synthesis Data Sheet

Entry No. 51 (Exp. T017) Employed in: Fig 9

| Catalyst, Additives                                                              |                        |                 | Reaction conditions                          |                 | Gas feed rate (sccm)                                                                                               |                                            |                                                          |                                                          |                                                     |                                                      |                |
|----------------------------------------------------------------------------------|------------------------|-----------------|----------------------------------------------|-----------------|--------------------------------------------------------------------------------------------------------------------|--------------------------------------------|----------------------------------------------------------|----------------------------------------------------------|-----------------------------------------------------|------------------------------------------------------|----------------|
| Name                                                                             | Conc.                  | (Unit)          | T <sub>0</sub> (°C)                          | 27.3            |                                                                                                                    | H <sub>2</sub>                             | O <sub>2</sub>                                           | N <sub>2</sub>                                           | Sum                                                 |                                                      |                |
| Pt-PVP                                                                           | 1.04                   | (mg/L)          | T (°C)                                       | 30.2            | Set                                                                                                                | 2.50                                       | 20.00                                                    | 27.50                                                    | 50.00                                               |                                                      |                |
|                                                                                  |                        |                 | P <sub>0</sub> (hPa)                         | 1009.3          | Calibrated                                                                                                         | 2.65                                       | 18.73                                                    | 27.25                                                    | 48.63                                               |                                                      |                |
|                                                                                  |                        |                 | P (hPa)                                      | 1017.5          | Determination of final [H <sub>2</sub> O <sub>2</sub> ]                                                            | Sample (g)                                 | Absorbance (—)                                           | [H <sub>2</sub> O <sub>2</sub> ] (mmol L <sup>-1</sup> ) |                                                     |                                                      |                |
|                                                                                  |                        |                 | Agitation (rpm)                              | 1200            |                                                                                                                    |                                            |                                                          |                                                          | 1.892                                               | 0.010                                                | 0.18           |
| Comment:<br>Catalyst activation: H <sub>2</sub> gas 20 sccm at 303 K for 40 min. |                        |                 |                                              |                 | Analysis of H <sub>2</sub> O <sub>2</sub> formation selectivity and H <sub>2</sub> O <sub>2</sub> destruction rate |                                            |                                                          | S <sub>f</sub> (—)                                       | 0.1199                                              |                                                      |                |
|                                                                                  |                        |                 |                                              |                 |                                                                                                                    |                                            |                                                          | k <sub>a</sub> [Cat] (h <sup>-1</sup> )                  | 2.2006                                              |                                                      |                |
|                                                                                  |                        |                 |                                              |                 |                                                                                                                    |                                            |                                                          | R <sup>2</sup>                                           | 0.9784                                              |                                                      |                |
| GC calibration                                                                   |                        | GC count        |                                              |                 | Ratio of sensitivity (toward N <sub>2</sub> )                                                                      |                                            | Feed gas measurement                                     |                                                          |                                                     |                                                      |                |
| Timing                                                                           | No.                    | H <sub>2</sub>  | O <sub>2</sub>                               | N <sub>2</sub>  | H <sub>2</sub>                                                                                                     | O <sub>2</sub>                             |                                                          |                                                          |                                                     |                                                      |                |
| Before reaction                                                                  | 1                      | 262977          | 202208                                       | 242952          | 0.0898                                                                                                             | 0.0885                                     | 0.825                                                    | T <sub>a</sub> (°C)                                      | 27.7                                                |                                                      |                |
|                                                                                  | 2                      | 264515          | 201892                                       | 242605          | 0.0892                                                                                                             |                                            |                                                          | 0.826                                                    | P <sub>0</sub> (hPa)                                | 1009.6                                               |                |
|                                                                                  | 3                      | 265064          | 201896                                       | 242347          | 0.0889                                                                                                             |                                            |                                                          | 0.825                                                    | Flow (cc/min)                                       |                                                      |                |
| After reaction                                                                   | 4                      | 266887          | 200464                                       | 240810          | 0.0877                                                                                                             |                                            |                                                          | 0.826                                                    | H <sub>2</sub>                                      | 3.04                                                 |                |
|                                                                                  | 5                      | 267097          | 200670                                       | 240940          | 0.0877                                                                                                             |                                            |                                                          | 0.825                                                    | O <sub>2</sub>                                      | 21.49                                                |                |
|                                                                                  | 6                      | 266746          | 200620                                       | 240976          | 0.0878                                                                                                             |                                            |                                                          | 0.825                                                    | N <sub>2</sub>                                      | 31.27                                                |                |
| Time                                                                             |                        |                 |                                              | GC count        |                                                                                                                    |                                            | t <sub>correct</sub> (min)                               | Outlet flow (sccm)                                       |                                                     | Conversion(%)                                        |                |
| H                                                                                | M                      | S               | min.                                         | H <sub>2</sub>  | O <sub>2</sub>                                                                                                     | N <sub>2</sub>                             |                                                          | H <sub>2</sub>                                           | O <sub>2</sub>                                      | H <sub>2</sub>                                       | O <sub>2</sub> |
| 15                                                                               | 43                     | 50              | 4.0                                          | 186115          | 121195                                                                                                             | 298933                                     | 0.00                                                     | 1.95                                                     | 18.34                                               | 26.35                                                | 2.07           |
| 15                                                                               | 53                     | 54              | 14.1                                         | 188444          | 189657                                                                                                             | 242636                                     | 9.88                                                     | 1.97                                                     | 18.36                                               | 25.49                                                | 1.96           |
| 16                                                                               | 3                      | 56              | 24.1                                         | 195414          | 194159                                                                                                             | 238191                                     | 19.92                                                    | 2.00                                                     | 18.38                                               | 24.62                                                | 1.85           |
| 16                                                                               | 13                     | 58              | 34.1                                         | 198478          | 193926                                                                                                             | 237089                                     | 29.95                                                    | 2.02                                                     | 18.40                                               | 23.78                                                | 1.76           |
| 16                                                                               | 24                     | 2               | 44.2                                         | 201164          | 194357                                                                                                             | 237256                                     | 40.02                                                    | 2.05                                                     | 18.43                                               | 22.80                                                | 1.61           |
| 16                                                                               | 34                     | 4               | 54.2                                         | 202926          | 194242                                                                                                             | 236941                                     | 50.05                                                    | 2.07                                                     | 18.44                                               | 22.02                                                | 1.53           |
| 16                                                                               | 44                     | 8               | 64.3                                         | 204133          | 194095                                                                                                             | 236714                                     | 60.12                                                    | 2.08                                                     | 18.45                                               | 21.48                                                | 1.52           |
| 16                                                                               | 54                     | 10              | 74.3                                         | 205390          | 194019                                                                                                             | 236552                                     | 70.15                                                    | 2.09                                                     | 18.45                                               | 20.94                                                | 1.49           |
| 17                                                                               | 4                      | 14              | 84.4                                         | 206224          | 193771                                                                                                             | 236158                                     | 80.22                                                    | 2.11                                                     | 18.46                                               | 20.49                                                | 1.45           |
| 17                                                                               | 14                     | 16              | 94.4                                         | 207345          | 193646                                                                                                             | 236085                                     | 90.25                                                    | 2.12                                                     | 18.45                                               | 20.03                                                | 1.48           |
| 17                                                                               | 24                     | 20              | 104.5                                        | 208482          | 193821                                                                                                             | 236302                                     | 100.32                                                   | 2.13                                                     | 18.45                                               | 19.67                                                | 1.48           |
| 17                                                                               | 34                     | 22              | 114.5                                        | 209449          | 194200                                                                                                             | 236506                                     | 110.35                                                   | 2.14                                                     | 18.47                                               | 19.37                                                | 1.38           |
| 17                                                                               | 44                     | 26              | 124.6                                        | 210277          | 194273                                                                                                             | 236563                                     | 120.42                                                   | 2.14                                                     | 18.48                                               | 19.07                                                | 1.36           |
| t <sub>correct</sub> (min)                                                       | Partial pressure (kPa) |                 | Rate (mmol L <sup>-1</sup> h <sup>-1</sup> ) |                 | d[H <sub>2</sub> O <sub>2</sub> ]/dt (mmol L <sup>-1</sup> h <sup>-1</sup> )                                       | Σ[H <sub>2</sub> ] (mmol L <sup>-1</sup> ) | [H <sub>2</sub> O <sub>2</sub> ] (mmol L <sup>-1</sup> ) | S <sub>e</sub> (—)                                       | Σ <sub>2</sub> [H <sub>2</sub> O <sub>2</sub> ] (h) | Σ <sub>1</sub> /[H <sub>2</sub> O <sub>2</sub> ] (—) |                |
|                                                                                  | P <sub>H2</sub>        | P <sub>O2</sub> | r <sub>H2</sub>                              | r <sub>O2</sub> |                                                                                                                    |                                            |                                                          |                                                          |                                                     |                                                      |                |
| 0.00                                                                             | 4.00                   | 37.61           | 6.23                                         | 3.47            | 0.70                                                                                                               | 0.00                                       | 0.00                                                     |                                                          | 0.000                                               | 0.000                                                |                |
| 9.88                                                                             | 4.04                   | 37.62           | 6.03                                         | 3.28            | 0.54                                                                                                               | 1.01                                       | 0.10                                                     | 0.10                                                     | 0.082                                               | 9.922                                                |                |
| 19.92                                                                            | 4.09                   | 37.63           | 5.82                                         | 3.10            | 0.38                                                                                                               | 2.00                                       | 0.18                                                     | 0.09                                                     | 0.178                                               | 11.220                                               |                |
| 29.95                                                                            | 4.13                   | 37.64           | 5.62                                         | 2.94            | 0.25                                                                                                               | 2.96                                       | 0.23                                                     | 0.08                                                     | 0.286                                               | 12.820                                               |                |
| 40.02                                                                            | 4.18                   | 37.65           | 5.39                                         | 2.69            | -0.02                                                                                                              | 3.88                                       | 0.25                                                     | 0.06                                                     | 0.425                                               | 15.516                                               |                |
| 50.05                                                                            | 4.22                   | 37.65           | 5.21                                         | 2.57            | -0.08                                                                                                              | 4.77                                       | 0.24                                                     | 0.05                                                     | 0.609                                               | 19.671                                               |                |
| 60.12                                                                            | 4.25                   | 37.65           | 5.08                                         | 2.53            | -0.01                                                                                                              | 5.63                                       | 0.23                                                     | 0.04                                                     | 0.799                                               | 23.979                                               |                |
| 70.15                                                                            | 4.27                   | 37.64           | 4.95                                         | 2.49            | 0.02                                                                                                               | 6.47                                       | 0.24                                                     | 0.04                                                     | 0.965                                               | 27.535                                               |                |
| 80.22                                                                            | 4.30                   | 37.64           | 4.85                                         | 2.42            | 0.00                                                                                                               | 7.29                                       | 0.24                                                     | 0.03                                                     | 1.129                                               | 30.902                                               |                |
| 90.25                                                                            | 4.32                   | 37.62           | 4.74                                         | 2.48            | 0.21                                                                                                               | 8.10                                       | 0.25                                                     | 0.03                                                     | 1.212                                               | 31.922                                               |                |
| 100.32                                                                           | 4.34                   | 37.62           | 4.65                                         | 2.48            | 0.31                                                                                                               | 8.88                                       | 0.30                                                     | 0.03                                                     | 1.189                                               | 29.884                                               |                |
| 110.35                                                                           | 4.35                   | 37.64           | 4.58                                         | 2.30            | 0.02                                                                                                               | 9.66                                       | 0.32                                                     | 0.03                                                     | 1.250                                               | 29.770                                               |                |
| 120.42                                                                           | 4.37                   | 37.63           | 4.51                                         | 2.28            | 0.04                                                                                                               | 10.42                                      | 0.33                                                     | 0.03                                                     | 1.397                                               | 31.612                                               |                |

## H<sub>2</sub>O<sub>2</sub> Synthesis Data Sheet

Entry No. 52 (Exp. T009) Employed in: Fig 9

| Catalyst, Additives                                                              |                        |                 | Reaction conditions                          |                 | Gas feed rate (sccm)                                                                                               |                                            |                                                          |                                                          |                                                     |                                                      |                |
|----------------------------------------------------------------------------------|------------------------|-----------------|----------------------------------------------|-----------------|--------------------------------------------------------------------------------------------------------------------|--------------------------------------------|----------------------------------------------------------|----------------------------------------------------------|-----------------------------------------------------|------------------------------------------------------|----------------|
| Name                                                                             | Conc.                  | (Unit)          | T <sub>0</sub> (°C)                          | 28.4            |                                                                                                                    | H <sub>2</sub>                             | O <sub>2</sub>                                           | N <sub>2</sub>                                           | Sum                                                 |                                                      |                |
| Pt-PVP                                                                           | 1.04                   | (mg/L)          | T (°C)                                       | 30.1            | Set                                                                                                                | 5.00                                       | 20.00                                                    | 25.00                                                    | 50.00                                               |                                                      |                |
|                                                                                  |                        |                 | P <sub>0</sub> (hPa)                         | 993.6           | Calibrated                                                                                                         | 5.04                                       | 18.51                                                    | 24.85                                                    | 48.39                                               |                                                      |                |
|                                                                                  |                        |                 | P (hPa)                                      | 1001.5          | Determination of final [H <sub>2</sub> O <sub>2</sub> ]                                                            | Sample (g)                                 | Absorbance (—)                                           | [H <sub>2</sub> O <sub>2</sub> ] (mmol L <sup>-1</sup> ) |                                                     |                                                      |                |
|                                                                                  |                        |                 | Agitation (rpm)                              | 1200            |                                                                                                                    |                                            |                                                          |                                                          | 1.822                                               | 0.003                                                | 0.06           |
| Comment:<br>Catalyst activation: H <sub>2</sub> gas 20 sccm at 303 K for 40 min. |                        |                 |                                              |                 | Analysis of H <sub>2</sub> O <sub>2</sub> formation selectivity and H <sub>2</sub> O <sub>2</sub> destruction rate |                                            |                                                          | S <sub>f</sub> (—)                                       | 0.0467                                              |                                                      |                |
|                                                                                  |                        |                 |                                              |                 |                                                                                                                    |                                            |                                                          | k <sub>d</sub> [Cat] (h <sup>-1</sup> )                  | 0.0203                                              |                                                      |                |
|                                                                                  |                        |                 |                                              |                 |                                                                                                                    |                                            |                                                          | R <sup>2</sup>                                           | 0.0109                                              |                                                      |                |
| GC calibration                                                                   |                        | GC count        |                                              |                 | Ratio of sensitivity (toward N <sub>2</sub> )                                                                      |                                            | Feed gas measurement                                     |                                                          |                                                     |                                                      |                |
| Timing                                                                           | No.                    | H <sub>2</sub>  | O <sub>2</sub>                               | N <sub>2</sub>  | H <sub>2</sub>                                                                                                     | O <sub>2</sub>                             |                                                          |                                                          |                                                     |                                                      |                |
| Before reaction                                                                  | 1                      | 514885          | 202581                                       | 221852          | 0.0873                                                                                                             | 0.0868                                     | 0.816                                                    | T <sub>a</sub> (°C)                                      | 28.4                                                |                                                      |                |
|                                                                                  | 2                      | 515240          | 202303                                       | 221459          | 0.0871                                                                                                             |                                            |                                                          | 0.816                                                    | P <sub>0</sub> (hPa)                                | 993.2                                                |                |
|                                                                                  | 3                      | 516002          | 202068                                       | 221211          | 0.0869                                                                                                             |                                            |                                                          | 0.816                                                    | Flow (cc/min)                                       |                                                      |                |
| After reaction                                                                   | 4                      | 516783          | 201164                                       | 220397          | 0.0864                                                                                                             |                                            |                                                          | 0.816                                                    | H <sub>2</sub>                                      | 5.90                                                 |                |
|                                                                                  | 5                      | 516957          | 201232                                       | 220496          | 0.0864                                                                                                             |                                            |                                                          | 0.816                                                    | O <sub>2</sub>                                      | 21.69                                                |                |
|                                                                                  | 6                      | 517048          | 201215                                       | 220479          | 0.0864                                                                                                             |                                            |                                                          | 0.816                                                    | N <sub>2</sub>                                      | 29.11                                                |                |
| Time                                                                             |                        |                 |                                              | GC count        |                                                                                                                    |                                            | t <sub>correct</sub> (min)                               | Outlet flow (sccm)                                       |                                                     | Conversion(%)                                        |                |
| H                                                                                | M                      | S               | min.                                         | H <sub>2</sub>  | O <sub>2</sub>                                                                                                     | N <sub>2</sub>                             |                                                          | H <sub>2</sub>                                           | O <sub>2</sub>                                      | H <sub>2</sub>                                       | O <sub>2</sub> |
| 17                                                                               | 47                     | 34              | 4.0                                          | 309041          | 119363                                                                                                             | 289920                                     | 0.00                                                     | 3.44                                                     | 17.67                                               | 31.62                                                | 4.53           |
| 17                                                                               | 57                     | 38              | 14.1                                         | 348211          | 189826                                                                                                             | 228922                                     | 9.81                                                     | 3.48                                                     | 17.70                                               | 30.87                                                | 4.40           |
| 18                                                                               | 7                      | 40              | 24.1                                         | 361548          | 194816                                                                                                             | 223741                                     | 19.85                                                    | 3.52                                                     | 17.72                                               | 30.10                                                | 4.28           |
| 18                                                                               | 17                     | 42              | 34.1                                         | 367702          | 194945                                                                                                             | 222759                                     | 29.88                                                    | 3.56                                                     | 17.74                                               | 29.33                                                | 4.15           |
| 18                                                                               | 37                     | 48              | 54.2                                         | 374579          | 194850                                                                                                             | 222054                                     | 49.98                                                    | 3.64                                                     | 17.79                                               | 27.78                                                | 3.89           |
| 18                                                                               | 37                     | 48              | 54.2                                         | 374579          | 194850                                                                                                             | 222054                                     | 49.98                                                    | 3.64                                                     | 17.79                                               | 27.78                                                | 3.89           |
| 18                                                                               | 47                     | 52              | 64.3                                         | 377384          | 194731                                                                                                             | 222127                                     | 60.05                                                    | 3.66                                                     | 17.78                                               | 27.26                                                | 3.98           |
| 18                                                                               | 57                     | 54              | 74.3                                         | 379826          | 194592                                                                                                             | 221512                                     | 70.08                                                    | 3.70                                                     | 17.81                                               | 26.59                                                | 3.78           |
| 19                                                                               | 7                      | 58              | 84.4                                         | 382104          | 194678                                                                                                             | 221462                                     | 80.15                                                    | 3.72                                                     | 17.82                                               | 26.13                                                | 3.72           |
| 19                                                                               | 18                     | 0               | 94.4                                         | 383334          | 194437                                                                                                             | 221151                                     | 90.18                                                    | 3.74                                                     | 17.83                                               | 25.79                                                | 3.70           |
| 19                                                                               | 28                     | 4               | 104.5                                        | 385408          | 194657                                                                                                             | 221250                                     | 100.25                                                   | 3.76                                                     | 17.84                                               | 25.42                                                | 3.64           |
| 19                                                                               | 38                     | 6               | 114.5                                        | 386225          | 194542                                                                                                             | 221018                                     | 110.28                                                   | 3.77                                                     | 17.85                                               | 25.18                                                | 3.59           |
| 19                                                                               | 48                     | 10              | 124.6                                        | 387447          | 194327                                                                                                             | 220718                                     | 120.35                                                   | 3.78                                                     | 17.85                                               | 24.85                                                | 3.57           |
| t <sub>correct</sub> (min)                                                       | Partial pressure (kPa) |                 | Rate (mmol L <sup>-1</sup> h <sup>-1</sup> ) |                 | d[H <sub>2</sub> O <sub>2</sub> ]/dt (mmol L <sup>-1</sup> h <sup>-1</sup> )                                       | Σ[H <sub>2</sub> ] (mmol L <sup>-1</sup> ) | [H <sub>2</sub> O <sub>2</sub> ] (mmol L <sup>-1</sup> ) | S <sub>e</sub> (—)                                       | Σ <sub>2</sub> [H <sub>2</sub> O <sub>2</sub> ] (h) | Σ <sub>1</sub> /[H <sub>2</sub> O <sub>2</sub> ] (—) |                |
|                                                                                  | P <sub>H2</sub>        | P <sub>O2</sub> | r <sub>H2</sub>                              | r <sub>O2</sub> |                                                                                                                    |                                            |                                                          |                                                          |                                                     |                                                      |                |
| 0.00                                                                             | 7.19                   | 36.88           | 14.22                                        | 7.49            | 0.75                                                                                                               | 0.00                                       | 0.00                                                     |                                                          | 0.000                                               | 0.000                                                |                |
| 9.81                                                                             | 7.25                   | 36.88           | 13.88                                        | 7.28            | 0.68                                                                                                               | 2.30                                       | 0.12                                                     | 0.05                                                     | 0.082                                               | 19.572                                               |                |
| 19.85                                                                            | 7.33                   | 36.88           | 13.53                                        | 7.07            | 0.60                                                                                                               | 4.59                                       | 0.22                                                     | 0.05                                                     | 0.170                                               | 20.417                                               |                |
| 29.88                                                                            | 7.40                   | 36.88           | 13.19                                        | 6.86            | 0.53                                                                                                               | 6.82                                       | 0.32                                                     | 0.05                                                     | 0.262                                               | 21.363                                               |                |
| 49.98                                                                            | 7.54                   | 36.88           | 12.49                                        | 6.43            | 0.37                                                                                                               | 11.12                                      | 0.47                                                     | 0.04                                                     | 0.459                                               | 23.649                                               |                |
| 49.98                                                                            | 7.54                   | 36.88           | 12.49                                        | 6.43            | 0.37                                                                                                               | 11.12                                      | 0.47                                                     | 0.04                                                     | 0.459                                               | 23.649                                               |                |
| 60.05                                                                            | 7.59                   | 36.84           | 12.26                                        | 6.58            | 0.90                                                                                                               | 13.20                                      | 0.58                                                     | 0.04                                                     | 0.526                                               | 22.853                                               |                |
| 70.08                                                                            | 7.65                   | 36.86           | 11.95                                        | 6.25            | 0.55                                                                                                               | 15.22                                      | 0.70                                                     | 0.05                                                     | 0.587                                               | 21.765                                               |                |
| 80.15                                                                            | 7.69                   | 36.85           | 11.75                                        | 6.15            | 0.55                                                                                                               | 17.21                                      | 0.79                                                     | 0.05                                                     | 0.677                                               | 21.740                                               |                |
| 90.18                                                                            | 7.72                   | 36.84           | 11.59                                        | 6.12            | 0.65                                                                                                               | 19.17                                      | 0.89                                                     | 0.05                                                     | 0.759                                               | 21.496                                               |                |
| 100.25                                                                           | 7.76                   | 36.84           | 11.43                                        | 6.01            | 0.60                                                                                                               | 21.10                                      | 1.00                                                     | 0.05                                                     | 0.838                                               | 21.186                                               |                |
| 110.28                                                                           | 7.78                   | 36.85           | 11.32                                        | 5.94            | 0.56                                                                                                               | 23.00                                      | 1.09                                                     | 0.05                                                     | 0.924                                               | 21.061                                               |                |
| 120.35                                                                           | 7.81                   | 36.84           | 11.17                                        | 5.90            | 0.63                                                                                                               | 24.89                                      | 1.19                                                     | 0.05                                                     | 1.008                                               | 20.891                                               |                |

## H<sub>2</sub>O<sub>2</sub> Synthesis Data Sheet

Entry No. 53 (Exp. T011) Employed in: Fig 9

| Catalyst, Additives                                                              |                        |                 | Reaction conditions                          |                 | Gas feed rate (sccm)                                                                                               |                                            |                                                          |                                                          |                                                     |                                                      |      |
|----------------------------------------------------------------------------------|------------------------|-----------------|----------------------------------------------|-----------------|--------------------------------------------------------------------------------------------------------------------|--------------------------------------------|----------------------------------------------------------|----------------------------------------------------------|-----------------------------------------------------|------------------------------------------------------|------|
| Name                                                                             | Conc.                  | (Unit)          | T <sub>0</sub> (°C)                          | 27.5            |                                                                                                                    | H <sub>2</sub>                             | O <sub>2</sub>                                           | N <sub>2</sub>                                           | Sum                                                 |                                                      |      |
| Pt-PVP                                                                           | 1.04                   | (mg/L)          | T (°C)                                       | 30.2            | Set                                                                                                                | 7.50                                       | 20.00                                                    | 22.50                                                    | 50.00                                               |                                                      |      |
|                                                                                  |                        |                 | P <sub>0</sub> (hPa)                         | 999.7           | Calibrated                                                                                                         | 7.57                                       | 18.52                                                    | 22.26                                                    | 48.34                                               |                                                      |      |
|                                                                                  |                        |                 | P (hPa)                                      | 1007.3          | Determination of final [H <sub>2</sub> O <sub>2</sub> ]                                                            | Sample (g)                                 | Absorbance (—)                                           | [H <sub>2</sub> O <sub>2</sub> ] (mmol L <sup>-1</sup> ) |                                                     |                                                      |      |
|                                                                                  |                        |                 | Agitation (rpm)                              | 1200            |                                                                                                                    |                                            |                                                          |                                                          | 1.533                                               | 0.013                                                | 0.29 |
| Comment:<br>Catalyst activation: H <sub>2</sub> gas 20 sccm at 303 K for 40 min. |                        |                 |                                              |                 | Analysis of H <sub>2</sub> O <sub>2</sub> formation selectivity and H <sub>2</sub> O <sub>2</sub> destruction rate |                                            |                                                          | S <sub>f</sub> (—)                                       | 0.0431                                              |                                                      |      |
|                                                                                  |                        |                 |                                              |                 |                                                                                                                    |                                            |                                                          | k <sub>d</sub> [Cat] (h <sup>-1</sup> )                  | 0.2462                                              |                                                      |      |
|                                                                                  |                        |                 |                                              |                 |                                                                                                                    |                                            |                                                          | R <sup>2</sup>                                           | 0.9228                                              |                                                      |      |
| GC calibration                                                                   |                        | GC count        |                                              |                 | Ratio of sensitivity (toward N <sub>2</sub> )                                                                      |                                            | Feed gas measurement                                     |                                                          |                                                     |                                                      |      |
| Timing                                                                           | No.                    | H <sub>2</sub>  | O <sub>2</sub>                               | N <sub>2</sub>  | H <sub>2</sub>                                                                                                     | O <sub>2</sub>                             |                                                          |                                                          |                                                     |                                                      |      |
| Before reaction                                                                  | 1                      | 768698          | 201690                                       | 198810          | 0.0879                                                                                                             | 0.820                                      | 0.819                                                    | T <sub>a</sub> (°C)                                      | 27.1                                                |                                                      |      |
|                                                                                  | 2                      | 767725          | 201887                                       | 198798          | 0.0880                                                                                                             | 0.819                                      |                                                          | P <sub>0</sub> (hPa)                                     | 1002.1                                              |                                                      |      |
|                                                                                  | 3                      | 767660          | 201747                                       | 198746          | 0.0880                                                                                                             | 0.820                                      |                                                          | Flow (cc/min)                                            |                                                     |                                                      |      |
| After reaction                                                                   | 4                      | 769009          | 201883                                       | 198806          | 0.0879                                                                                                             | 0.819                                      | H <sub>2</sub>                                           | 8.72                                                     |                                                     |                                                      |      |
|                                                                                  | 5                      | 769153          | 201912                                       | 198667          | 0.0878                                                                                                             | 0.819                                      | O <sub>2</sub>                                           | 21.34                                                    |                                                     |                                                      |      |
|                                                                                  | 6                      | 769162          | 202032                                       | 198781          | 0.0879                                                                                                             | 0.819                                      | N <sub>2</sub>                                           | 25.65                                                    |                                                     |                                                      |      |
| Time                                                                             |                        | GC count        |                                              |                 | t <sub>correct</sub> (min)                                                                                         | Outlet flow (sccm)                         |                                                          | Conversion(%)                                            |                                                     |                                                      |      |
| H                                                                                | M                      | S               | min.                                         | H <sub>2</sub>  |                                                                                                                    | O <sub>2</sub>                             | N <sub>2</sub>                                           | H <sub>2</sub>                                           | O <sub>2</sub>                                      |                                                      |      |
| 16                                                                               | 2                      | 16              | 4.0                                          | 412289          | 118752                                                                                                             | 282684                                     | 0.00                                                     | 4.90                                                     | 17.12                                               | 35.30                                                | 7.53 |
| 16                                                                               | 12                     | 18              | 14.0                                         | 510184          | 190327                                                                                                             | 215348                                     | 9.60                                                     | 4.95                                                     | 17.16                                               | 34.54                                                | 7.35 |
| 16                                                                               | 22                     | 22              | 24.1                                         | 529337          | 195761                                                                                                             | 208876                                     | 19.67                                                    | 5.01                                                     | 17.19                                               | 33.74                                                | 7.17 |
| 16                                                                               | 32                     | 24              | 34.1                                         | 539381          | 196564                                                                                                             | 208123                                     | 29.70                                                    | 5.07                                                     | 17.22                                               | 32.97                                                | 7.00 |
| 16                                                                               | 42                     | 28              | 44.2                                         | 545061          | 196453                                                                                                             | 207430                                     | 39.77                                                    | 5.14                                                     | 17.27                                               | 32.04                                                | 6.74 |
| 16                                                                               | 52                     | 30              | 54.2                                         | 549663          | 196392                                                                                                             | 207096                                     | 49.80                                                    | 5.19                                                     | 17.29                                               | 31.36                                                | 6.62 |
| 17                                                                               | 2                      | 32              | 64.3                                         | 552751          | 196355                                                                                                             | 206764                                     | 59.83                                                    | 5.23                                                     | 17.32                                               | 30.86                                                | 6.49 |
| 17                                                                               | 12                     | 36              | 74.3                                         | 556082          | 196298                                                                                                             | 206543                                     | 69.90                                                    | 5.27                                                     | 17.33                                               | 30.37                                                | 6.42 |
| 17                                                                               | 22                     | 38              | 84.4                                         | 559241          | 196395                                                                                                             | 206385                                     | 79.93                                                    | 5.30                                                     | 17.35                                               | 29.92                                                | 6.30 |
| 17                                                                               | 32                     | 42              | 94.4                                         | 561660          | 196274                                                                                                             | 206277                                     | 90.00                                                    | 5.33                                                     | 17.35                                               | 29.58                                                | 6.31 |
| 17                                                                               | 42                     | 44              | 104.5                                        | 563611          | 196477                                                                                                             | 206110                                     | 100.03                                                   | 5.35                                                     | 17.38                                               | 29.28                                                | 6.13 |
| 17                                                                               | 52                     | 48              | 114.5                                        | 565599          | 196383                                                                                                             | 205923                                     | 110.10                                                   | 5.37                                                     | 17.39                                               | 28.97                                                | 6.09 |
| 18                                                                               | 2                      | 50              | 124.6                                        | 566919          | 196207                                                                                                             | 205754                                     | 120.13                                                   | 5.39                                                     | 17.39                                               | 28.74                                                | 6.10 |
| t <sub>correct</sub> (min)                                                       | Partial pressure (kPa) |                 | Rate (mmol L <sup>-1</sup> h <sup>-1</sup> ) |                 | d[H <sub>2</sub> O <sub>2</sub> ]/dt (mmol L <sup>-1</sup> h <sup>-1</sup> )                                       | Σ[H <sub>2</sub> ] (mmol L <sup>-1</sup> ) | [H <sub>2</sub> O <sub>2</sub> ] (mmol L <sup>-1</sup> ) | S <sub>f</sub> (—)                                       | Σ <sub>2</sub> [H <sub>2</sub> O <sub>2</sub> ] (h) | Σ <sub>1</sub> /[H <sub>2</sub> O <sub>2</sub> ] (—) |      |
| 0.00                                                                             | P <sub>H2</sub>        | P <sub>O2</sub> | r <sub>H2</sub>                              | r <sub>O2</sub> | 1.06                                                                                                               | 0.00                                       | 0.00                                                     |                                                          | 0.000                                               | 0.000                                                |      |
| 9.60                                                                             | 10.77                  | 37.31           | 23.33                                        | 12.16           | 0.98                                                                                                               | 3.77                                       | 0.16                                                     | 0.04                                                     | 0.080                                               | 23.084                                               |      |
| 19.67                                                                            | 10.88                  | 37.31           | 22.79                                        | 11.85           | 0.90                                                                                                               | 7.64                                       | 0.32                                                     | 0.04                                                     | 0.167                                               | 23.759                                               |      |
| 29.70                                                                            | 10.98                  | 37.30           | 22.28                                        | 11.57           | 0.87                                                                                                               | 11.41                                      | 0.47                                                     | 0.04                                                     | 0.255                                               | 24.288                                               |      |
| 39.77                                                                            | 11.11                  | 37.30           | 21.65                                        | 11.15           | 0.65                                                                                                               | 15.10                                      | 0.60                                                     | 0.04                                                     | 0.351                                               | 25.291                                               |      |
| 49.80                                                                            | 11.20                  | 37.29           | 21.19                                        | 10.95           | 0.71                                                                                                               | 18.68                                      | 0.71                                                     | 0.04                                                     | 0.449                                               | 26.308                                               |      |
| 59.83                                                                            | 11.27                  | 37.29           | 20.85                                        | 10.73           | 0.60                                                                                                               | 22.19                                      | 0.82                                                     | 0.04                                                     | 0.545                                               | 27.078                                               |      |
| 69.90                                                                            | 11.33                  | 37.28           | 20.52                                        | 10.61           | 0.70                                                                                                               | 25.66                                      | 0.93                                                     | 0.04                                                     | 0.639                                               | 27.636                                               |      |
| 79.93                                                                            | 11.39                  | 37.28           | 20.21                                        | 10.41           | 0.61                                                                                                               | 29.07                                      | 1.04                                                     | 0.04                                                     | 0.730                                               | 28.015                                               |      |
| 90.00                                                                            | 11.44                  | 37.26           | 19.98                                        | 10.43           | 0.87                                                                                                               | 32.44                                      | 1.16                                                     | 0.04                                                     | 0.811                                               | 27.932                                               |      |
| 100.03                                                                           | 11.48                  | 37.28           | 19.78                                        | 10.14           | 0.50                                                                                                               | 35.77                                      | 1.28                                                     | 0.04                                                     | 0.898                                               | 28.037                                               |      |
| 110.10                                                                           | 11.52                  | 37.27           | 19.57                                        | 10.07           | 0.58                                                                                                               | 39.07                                      | 1.37                                                     | 0.03                                                     | 1.001                                               | 28.598                                               |      |
| 120.13                                                                           | 11.55                  | 37.26           | 19.42                                        | 10.09           | 0.75                                                                                                               | 42.33                                      | 1.48                                                     | 0.03                                                     | 1.087                                               | 28.649                                               |      |

## H<sub>2</sub>O<sub>2</sub> Synthesis Data Sheet

Entry No. 54 (Exp. T008) Employed in: Fig 9

| Catalyst, Additives                                                              |                        |                 | Reaction conditions                          |                 | Gas feed rate (sccm)                                                                                               |                                            |                                                          |                                                          |                                                     |                                                      |                |
|----------------------------------------------------------------------------------|------------------------|-----------------|----------------------------------------------|-----------------|--------------------------------------------------------------------------------------------------------------------|--------------------------------------------|----------------------------------------------------------|----------------------------------------------------------|-----------------------------------------------------|------------------------------------------------------|----------------|
| Name                                                                             | Conc.                  | (Unit)          | T <sub>0</sub> (°C)                          | 24.7            |                                                                                                                    | H <sub>2</sub>                             | O <sub>2</sub>                                           | N <sub>2</sub>                                           | Sum                                                 |                                                      |                |
| Pt-PVP                                                                           | 1.04                   | (mg/L)          | T (°C)                                       | 30.1            | Set                                                                                                                | 10.00                                      | 20.00                                                    | 20.00                                                    | 50.00                                               |                                                      |                |
|                                                                                  |                        |                 | P <sub>0</sub> (hPa)                         | 1008.5          | Calibrated                                                                                                         | 9.99                                       | 18.45                                                    | 19.96                                                    | 48.40                                               |                                                      |                |
|                                                                                  |                        |                 | P (hPa)                                      | 1015.8          | Determination of final [H <sub>2</sub> O <sub>2</sub> ]                                                            | Sample (g)                                 | Absorbance (—)                                           | [H <sub>2</sub> O <sub>2</sub> ] (mmol L <sup>-1</sup> ) |                                                     |                                                      |                |
|                                                                                  |                        |                 | Agitation (rpm)                              | 1200            |                                                                                                                    |                                            |                                                          |                                                          | 1.306                                               | 0.016                                                | 0.42           |
| Comment:<br>Catalyst activation: H <sub>2</sub> gas 20 sccm at 303 K for 40 min. |                        |                 |                                              |                 | Analysis of H <sub>2</sub> O <sub>2</sub> formation selectivity and H <sub>2</sub> O <sub>2</sub> destruction rate |                                            |                                                          | S <sub>f</sub> (—)                                       | 0.0527                                              |                                                      |                |
|                                                                                  |                        |                 |                                              |                 |                                                                                                                    |                                            |                                                          | k <sub>a</sub> [Cat] (h <sup>-1</sup> )                  | 0.2651                                              |                                                      |                |
|                                                                                  |                        |                 |                                              |                 |                                                                                                                    |                                            |                                                          | R <sup>2</sup>                                           | 0.9480                                              |                                                      |                |
| GC calibration                                                                   |                        | GC count        |                                              |                 | Ratio of sensitivity (toward N <sub>2</sub> )                                                                      |                                            | Feed gas measurement                                     |                                                          |                                                     |                                                      |                |
| Timing                                                                           | No.                    | H <sub>2</sub>  | O <sub>2</sub>                               | N <sub>2</sub>  | H <sub>2</sub>                                                                                                     | O <sub>2</sub>                             |                                                          |                                                          |                                                     |                                                      |                |
| Before reaction                                                                  | 1                      | 1015268         | 204903                                       | 178881          | 0.0882                                                                                                             | 0.0881                                     | 0.807                                                    | T <sub>a</sub> (°C)                                      | 24.8                                                |                                                      |                |
|                                                                                  | 2                      | 1014446         | 204860                                       | 178836          | 0.0883                                                                                                             |                                            |                                                          | 0.807                                                    | P <sub>0</sub> (hPa)                                | 1008.4                                               |                |
|                                                                                  | 3                      | 1014743         | 204673                                       | 178640          | 0.0881                                                                                                             |                                            |                                                          | 0.807                                                    | Flow (cc/min)                                       |                                                      |                |
| After reaction                                                                   | 4                      | 1013004         | 203910                                       | 177895          | 0.0879                                                                                                             | 0.0806                                     | 0.806                                                    | H <sub>2</sub>                                           | 11.30                                               |                                                      |                |
|                                                                                  | 5                      | 1013348         | 203980                                       | 177912          | 0.0879                                                                                                             |                                            |                                                          | 0.806                                                    | O <sub>2</sub>                                      | 20.86                                                |                |
|                                                                                  | 6                      | 1012869         | 204009                                       | 177999          | 0.0880                                                                                                             |                                            |                                                          | 0.806                                                    | N <sub>2</sub>                                      | 22.57                                                |                |
| Time                                                                             |                        |                 |                                              | GC count        |                                                                                                                    |                                            | t <sub>correct</sub> (min)                               | Outlet flow (sccm)                                       |                                                     | Conversion(%)                                        |                |
| H                                                                                | M                      | S               | min.                                         | H <sub>2</sub>  | O <sub>2</sub>                                                                                                     | N <sub>2</sub>                             |                                                          | H <sub>2</sub>                                           | O <sub>2</sub>                                      | H <sub>2</sub>                                       | O <sub>2</sub> |
| 14                                                                               | 59                     | 30              | 4.0                                          | 524077          | 116123                                                                                                             | 281425                                     | 0.00                                                     | 6.06                                                     | 16.37                                               | 39.31                                                | 11.23          |
| 15                                                                               | 9                      | 34              | 14.1                                         | 661919          | 193700                                                                                                             | 205747                                     | 9.41                                                     | 6.15                                                     | 16.42                                               | 38.48                                                | 10.96          |
| 15                                                                               | 19                     | 36              | 24.1                                         | 690949          | 200452                                                                                                             | 193732                                     | 19.44                                                    | 6.24                                                     | 16.48                                               | 37.59                                                | 10.67          |
| 15                                                                               | 29                     | 38              | 34.1                                         | 703613          | 200881                                                                                                             | 195665                                     | 29.48                                                    | 6.32                                                     | 16.53                                               | 36.74                                                | 10.41          |
| 15                                                                               | 39                     | 42              | 44.2                                         | 712272          | 200793                                                                                                             | 194765                                     | 39.54                                                    | 6.43                                                     | 16.59                                               | 35.67                                                | 10.03          |
| 15                                                                               | 49                     | 44              | 54.2                                         | 718895          | 200813                                                                                                             | 194328                                     | 49.58                                                    | 6.50                                                     | 16.63                                               | 34.93                                                | 9.82           |
| 15                                                                               | 59                     | 48              | 64.3                                         | 723540          | 200417                                                                                                             | 193579                                     | 59.64                                                    | 6.57                                                     | 16.67                                               | 34.25                                                | 9.65           |
| 16                                                                               | 9                      | 50              | 74.3                                         | 727647          | 200528                                                                                                             | 193370                                     | 69.68                                                    | 6.61                                                     | 16.69                                               | 33.81                                                | 9.50           |
| 16                                                                               | 19                     | 54              | 84.4                                         | 731111          | 200358                                                                                                             | 192910                                     | 79.74                                                    | 6.66                                                     | 16.72                                               | 33.33                                                | 9.37           |
| 16                                                                               | 29                     | 56              | 94.4                                         | 734652          | 200254                                                                                                             | 192523                                     | 89.78                                                    | 6.71                                                     | 16.74                                               | 32.88                                                | 9.23           |
| 16                                                                               | 40                     | 0               | 104.5                                        | 737373          | 200164                                                                                                             | 192272                                     | 99.84                                                    | 6.74                                                     | 16.76                                               | 32.54                                                | 9.15           |
| 16                                                                               | 50                     | 2               | 114.5                                        | 739320          | 200052                                                                                                             | 192025                                     | 109.88                                                   | 6.77                                                     | 16.77                                               | 32.27                                                | 9.09           |
| 17                                                                               | 0                      | 6               | 124.6                                        | 740712          | 199700                                                                                                             | 191679                                     | 119.94                                                   | 6.79                                                     | 16.77                                               | 32.02                                                | 9.08           |
| t <sub>correct</sub> (min)                                                       | Partial pressure (kPa) |                 | Rate (mmol L <sup>-1</sup> h <sup>-1</sup> ) |                 | d[H <sub>2</sub> O <sub>2</sub> ]/dt (mmol L <sup>-1</sup> h <sup>-1</sup> )                                       | Σ[H <sub>2</sub> ] (mmol L <sup>-1</sup> ) | [H <sub>2</sub> O <sub>2</sub> ] (mmol L <sup>-1</sup> ) | S <sub>e</sub> (—)                                       | Σ <sub>2</sub> [H <sub>2</sub> O <sub>2</sub> ] (h) | Σ <sub>1</sub> /[H <sub>2</sub> O <sub>2</sub> ] (—) |                |
|                                                                                  | P <sub>H2</sub>        | P <sub>O2</sub> | r <sub>H2</sub>                              | r <sub>O2</sub> |                                                                                                                    |                                            |                                                          |                                                          |                                                     |                                                      |                |
| 0.00                                                                             | 13.92                  | 37.59           | 35.07                                        | 18.49           | 1.91                                                                                                               | 0.00                                       | 0.00                                                     |                                                          | 0.000                                               | 0.000                                                |                |
| 9.41                                                                             | 14.07                  | 37.59           | 34.33                                        | 18.05           | 1.77                                                                                                               | 5.44                                       | 0.29                                                     | 0.05                                                     | 0.078                                               | 18.893                                               |                |
| 19.44                                                                            | 14.22                  | 37.58           | 33.53                                        | 17.57           | 1.62                                                                                                               | 11.12                                      | 0.57                                                     | 0.05                                                     | 0.165                                               | 19.475                                               |                |
| 29.48                                                                            | 14.37                  | 37.58           | 32.78                                        | 17.14           | 1.50                                                                                                               | 16.66                                      | 0.83                                                     | 0.05                                                     | 0.255                                               | 20.035                                               |                |
| 39.54                                                                            | 14.56                  | 37.58           | 31.82                                        | 16.53           | 1.23                                                                                                               | 22.08                                      | 1.06                                                     | 0.05                                                     | 0.349                                               | 20.816                                               |                |
| 49.58                                                                            | 14.69                  | 37.57           | 31.16                                        | 16.18           | 1.20                                                                                                               | 27.35                                      | 1.26                                                     | 0.05                                                     | 0.447                                               | 21.644                                               |                |
| 59.64                                                                            | 14.81                  | 37.56           | 30.56                                        | 15.90           | 1.24                                                                                                               | 32.52                                      | 1.47                                                     | 0.05                                                     | 0.541                                               | 22.162                                               |                |
| 69.68                                                                            | 14.88                  | 37.56           | 30.16                                        | 15.65           | 1.15                                                                                                               | 37.60                                      | 1.67                                                     | 0.04                                                     | 0.634                                               | 22.560                                               |                |
| 79.74                                                                            | 14.96                  | 37.55           | 29.74                                        | 15.42           | 1.11                                                                                                               | 42.63                                      | 1.86                                                     | 0.04                                                     | 0.728                                               | 22.965                                               |                |
| 89.78                                                                            | 15.04                  | 37.55           | 29.33                                        | 15.20           | 1.07                                                                                                               | 47.56                                      | 2.04                                                     | 0.04                                                     | 0.823                                               | 23.328                                               |                |
| 99.84                                                                            | 15.10                  | 37.54           | 29.03                                        | 15.07           | 1.12                                                                                                               | 52.46                                      | 2.22                                                     | 0.04                                                     | 0.915                                               | 23.599                                               |                |
| 109.88                                                                           | 15.15                  | 37.53           | 28.79                                        | 14.97           | 1.14                                                                                                               | 57.29                                      | 2.41                                                     | 0.04                                                     | 1.004                                               | 23.757                                               |                |
| 119.94                                                                           | 15.19                  | 37.51           | 28.57                                        | 14.96           | 1.35                                                                                                               | 62.11                                      | 2.62                                                     | 0.04                                                     | 1.085                                               | 23.701                                               |                |

## H<sub>2</sub>O<sub>2</sub> Synthesis Data Sheet

Entry No. 55 (Exp. T010) Employed in: Fig 9

| Catalyst, Additives                                                              |                        |                 | Reaction conditions                          |                 | Gas feed rate (sccm)                                                                                               |                                            |                                                          |                                                          |                                                     |                                                      |                |
|----------------------------------------------------------------------------------|------------------------|-----------------|----------------------------------------------|-----------------|--------------------------------------------------------------------------------------------------------------------|--------------------------------------------|----------------------------------------------------------|----------------------------------------------------------|-----------------------------------------------------|------------------------------------------------------|----------------|
| Name                                                                             | Conc.                  | (Unit)          | T <sub>0</sub> (°C)                          | 27.0            |                                                                                                                    | H <sub>2</sub>                             | O <sub>2</sub>                                           | N <sub>2</sub>                                           | Sum                                                 |                                                      |                |
| Pt-PVP                                                                           | 1.04                   | (mg/L)          | T (°C)                                       | 30.2            | Set                                                                                                                | 15.00                                      | 20.00                                                    | 15.00                                                    | 50.00                                               |                                                      |                |
|                                                                                  |                        |                 | P <sub>0</sub> (hPa)                         | 996.7           | Calibrated                                                                                                         | 15.06                                      | 18.48                                                    | 14.98                                                    | 48.52                                               |                                                      |                |
|                                                                                  |                        |                 | P (hPa)                                      | 1003.2          | Determination of final [H <sub>2</sub> O <sub>2</sub> ]                                                            | Sample (g)                                 | Absorbance (—)                                           | [H <sub>2</sub> O <sub>2</sub> ] (mmol L <sup>-1</sup> ) |                                                     |                                                      |                |
|                                                                                  |                        |                 | Agitation (rpm)                              | 1200            |                                                                                                                    |                                            |                                                          |                                                          | 1.496                                               | 0.025                                                | 0.58           |
| Comment:<br>Catalyst activation: H <sub>2</sub> gas 20 sccm at 303 K for 40 min. |                        |                 |                                              |                 | Analysis of H <sub>2</sub> O <sub>2</sub> formation selectivity and H <sub>2</sub> O <sub>2</sub> destruction rate |                                            |                                                          | S <sub>f</sub> (—)                                       | 0.0338                                              |                                                      |                |
|                                                                                  |                        |                 |                                              |                 |                                                                                                                    |                                            |                                                          | k <sub>d</sub> [Cat] (h <sup>-1</sup> )                  | 0.1680                                              |                                                      |                |
|                                                                                  |                        |                 |                                              |                 |                                                                                                                    |                                            |                                                          | R <sup>2</sup>                                           | 0.9148                                              |                                                      |                |
| GC calibration                                                                   |                        | GC count        |                                              |                 | Ratio of sensitivity (toward N <sub>2</sub> )                                                                      |                                            |                                                          | Feed gas measurement                                     |                                                     |                                                      |                |
| Timing                                                                           | No.                    | H <sub>2</sub>  | O <sub>2</sub>                               | N <sub>2</sub>  | H <sub>2</sub>                                                                                                     | O <sub>2</sub>                             |                                                          |                                                          |                                                     |                                                      |                |
| Before reaction                                                                  | 1                      | 1467031         | 202352                                       | 133301          | 0.0913                                                                                                             | 0.0910                                     | 0.811                                                    | T <sub>a</sub> (°C)                                      | 26.8                                                |                                                      |                |
|                                                                                  | 2                      | 1467616         | 202342                                       | 133117          | 0.0912                                                                                                             |                                            |                                                          | 0.812                                                    | P <sub>0</sub> (hPa)                                | 996.8                                                |                |
|                                                                                  | 3                      | 1467786         | 202279                                       | 133047          | 0.0911                                                                                                             |                                            |                                                          | 0.811                                                    | Flow (cc/min)                                       |                                                      |                |
| After reaction                                                                   | 4                      | 1466496         | 201554                                       | 132336          | 0.0907                                                                                                             |                                            |                                                          | 0.810                                                    | H <sub>2</sub>                                      | 17.42                                                |                |
|                                                                                  | 5                      | 1467028         | 201472                                       | 132394          | 0.0907                                                                                                             |                                            |                                                          | 0.811                                                    | O <sub>2</sub>                                      | 21.38                                                |                |
|                                                                                  | 6                      | 1466520         | 201419                                       | 132322          | 0.0907                                                                                                             |                                            |                                                          | 0.810                                                    | N <sub>2</sub>                                      | 17.33                                                |                |
| Time                                                                             |                        |                 |                                              | GC count        |                                                                                                                    |                                            | t <sub>correct</sub> (min)                               | Outlet flow (sccm)                                       |                                                     | Conversion(%)                                        |                |
| H                                                                                | M                      | S               | min.                                         | H <sub>2</sub>  | O <sub>2</sub>                                                                                                     | N <sub>2</sub>                             |                                                          | H <sub>2</sub>                                           | O <sub>2</sub>                                      | H <sub>2</sub>                                       | O <sub>2</sub> |
| 10                                                                               | 33                     | 10              | 4.0                                          | 707522          | 112721                                                                                                             | 260580                                     | 0.00                                                     | 8.29                                                     | 14.98                                               | 44.92                                                | 18.93          |
| 10                                                                               | 43                     | 12              | 14.0                                         | 955609          | 191229                                                                                                             | 173606                                     | 8.97                                                     | 8.41                                                     | 15.04                                               | 44.16                                                | 18.59          |
| 10                                                                               | 53                     | 16              | 24.1                                         | 997953          | 199389                                                                                                             | 162562                                     | 19.03                                                    | 8.54                                                     | 15.12                                               | 43.30                                                | 18.20          |
| 11                                                                               | 3                      | 18              | 34.1                                         | 1018032         | 200125                                                                                                             | 160156                                     | 29.07                                                    | 8.66                                                     | 15.18                                               | 42.48                                                | 17.84          |
| 11                                                                               | 13                     | 22              | 44.2                                         | 1028540         | 199804                                                                                                             | 158969                                     | 39.13                                                    | 8.82                                                     | 15.27                                               | 41.45                                                | 17.36          |
| 11                                                                               | 23                     | 24              | 54.2                                         | 1036434         | 199590                                                                                                             | 158196                                     | 49.17                                                    | 8.93                                                     | 15.33                                               | 40.72                                                | 17.04          |
| 11                                                                               | 33                     | 26              | 64.3                                         | 1043394         | 199482                                                                                                             | 157668                                     | 59.20                                                    | 9.02                                                     | 15.37                                               | 40.12                                                | 16.81          |
| 11                                                                               | 43                     | 30              | 74.3                                         | 1047964         | 199274                                                                                                             | 157080                                     | 69.27                                                    | 9.09                                                     | 15.42                                               | 39.63                                                | 16.59          |
| 11                                                                               | 53                     | 32              | 84.4                                         | 1051579         | 199203                                                                                                             | 156677                                     | 79.30                                                    | 9.15                                                     | 15.45                                               | 39.27                                                | 16.40          |
| 12                                                                               | 3                      | 36              | 94.4                                         | 1054764         | 199202                                                                                                             | 156562                                     | 89.37                                                    | 9.18                                                     | 15.46                                               | 39.04                                                | 16.34          |
| 12                                                                               | 13                     | 38              | 104.5                                        | 1059064         | 199162                                                                                                             | 156338                                     | 99.40                                                    | 9.23                                                     | 15.48                                               | 38.70                                                | 16.24          |
| 12                                                                               | 23                     | 42              | 114.5                                        | 1061531         | 199014                                                                                                             | 156038                                     | 109.47                                                   | 9.27                                                     | 15.50                                               | 38.44                                                | 16.14          |
| 12                                                                               | 33                     | 44              | 124.6                                        | 1065845         | 199141                                                                                                             | 155886                                     | 119.50                                                   | 9.32                                                     | 15.52                                               | 38.13                                                | 16.00          |
| t <sub>correct</sub> (min)                                                       | Partial pressure (kPa) |                 | Rate (mmol L <sup>-1</sup> h <sup>-1</sup> ) |                 | d[H <sub>2</sub> O <sub>2</sub> ]/dt (mmol L <sup>-1</sup> h <sup>-1</sup> )                                       | Σ[H <sub>2</sub> ] (mmol L <sup>-1</sup> ) | [H <sub>2</sub> O <sub>2</sub> ] (mmol L <sup>-1</sup> ) | S <sub>e</sub> (—)                                       | Σ <sub>2</sub> [H <sub>2</sub> O <sub>2</sub> ] (h) | Σ <sub>1</sub> /[H <sub>2</sub> O <sub>2</sub> ] (—) |                |
| 0.00                                                                             | P <sub>H2</sub>        | P <sub>O2</sub> | r <sub>H2</sub>                              | r <sub>O2</sub> | 2.09                                                                                                               | 0.00                                       | 0.00                                                     |                                                          | 0.000                                               | 0.000                                                |                |
| 8.97                                                                             | 20.83                  | 37.62           | 60.40                                        | 31.24           | 1.98                                                                                                               | 8.95                                       | 0.30                                                     | 0.03                                                     | 0.075                                               | 29.393                                               |                |
| 19.03                                                                            | 21.02                  | 37.61           | 59.37                                        | 30.68           | 1.86                                                                                                               | 18.81                                      | 0.63                                                     | 0.03                                                     | 0.161                                               | 30.013                                               |                |
| 29.07                                                                            | 21.23                  | 37.59           | 58.22                                        | 30.04           | 1.76                                                                                                               | 28.46                                      | 0.93                                                     | 0.03                                                     | 0.249                                               | 30.609                                               |                |
| 39.13                                                                            | 21.43                  | 37.57           | 57.11                                        | 29.44           | 1.56                                                                                                               | 37.92                                      | 1.21                                                     | 0.03                                                     | 0.340                                               | 31.391                                               |                |
| 49.17                                                                            | 21.68                  | 37.56           | 55.73                                        | 28.64           | 1.51                                                                                                               | 47.16                                      | 1.46                                                     | 0.03                                                     | 0.433                                               | 32.202                                               |                |
| 59.20                                                                            | 21.86                  | 37.54           | 54.74                                        | 28.13           | 1.45                                                                                                               | 56.25                                      | 1.72                                                     | 0.03                                                     | 0.523                                               | 32.702                                               |                |
| 69.27                                                                            | 22.01                  | 37.52           | 53.94                                        | 27.74           | 1.46                                                                                                               | 65.24                                      | 1.97                                                     | 0.03                                                     | 0.613                                               | 33.082                                               |                |
| 79.30                                                                            | 22.12                  | 37.51           | 53.28                                        | 27.37           | 1.34                                                                                                               | 74.11                                      | 2.21                                                     | 0.03                                                     | 0.707                                               | 33.590                                               |                |
| 89.37                                                                            | 22.21                  | 37.51           | 52.79                                        | 27.07           | 1.45                                                                                                               | 82.94                                      | 2.44                                                     | 0.03                                                     | 0.799                                               | 33.992                                               |                |
| 99.40                                                                            | 22.26                  | 37.50           | 52.48                                        | 26.97           | 1.56                                                                                                               | 91.68                                      | 2.69                                                     | 0.03                                                     | 0.884                                               | 34.066                                               |                |
| 109.47                                                                           | 22.35                  | 37.48           | 52.03                                        | 26.80           | 1.58                                                                                                               | 100.38                                     | 2.95                                                     | 0.03                                                     | 0.965                                               | 33.972                                               |                |
| 119.50                                                                           | 22.41                  | 37.47           | 51.68                                        | 26.63           | 1.55                                                                                                               | 108.99                                     | 3.22                                                     | 0.03                                                     | 1.047                                               | 33.877                                               |                |
|                                                                                  | 22.48                  | 37.46           | 51.26                                        | 26.41           |                                                                                                                    |                                            |                                                          |                                                          |                                                     |                                                      |                |



## H<sub>2</sub>O<sub>2</sub> Synthesis Data Sheet

Entry No. 56 (Exp. T020) Employed in: Fig 9

| Catalyst, Additives                                                              |                        |                 | Reaction conditions                          |                 | Gas feed rate (sccm)                                                                                               |                                            |                                                          |                                                          |                                                     |                                                      |                |
|----------------------------------------------------------------------------------|------------------------|-----------------|----------------------------------------------|-----------------|--------------------------------------------------------------------------------------------------------------------|--------------------------------------------|----------------------------------------------------------|----------------------------------------------------------|-----------------------------------------------------|------------------------------------------------------|----------------|
| Name                                                                             | Conc.                  | (Unit)          | T <sub>0</sub> (°C)                          | 27.5            |                                                                                                                    | H <sub>2</sub>                             | O <sub>2</sub>                                           | N <sub>2</sub>                                           | Sum                                                 |                                                      |                |
| Pt-PVP                                                                           | 1.04                   | (mg/L)          | T (°C)                                       | 30.2            | Set                                                                                                                | 5.00                                       | 20.00                                                    | 25.00                                                    | 50.00                                               |                                                      |                |
|                                                                                  |                        |                 | P <sub>0</sub> (hPa)                         | 1008.8          | Calibrated                                                                                                         | 5.19                                       | 18.44                                                    | 24.71                                                    | 48.34                                               |                                                      |                |
| H <sub>2</sub> SO <sub>4</sub>                                                   | 0.01                   | (N)             | P (hPa)                                      | 1016.7          | Determination of final [H <sub>2</sub> O <sub>2</sub> ]                                                            | Sample (g)                                 | Absorbance (—)                                           | [H <sub>2</sub> O <sub>2</sub> ] (mmol L <sup>-1</sup> ) |                                                     |                                                      |                |
|                                                                                  |                        |                 | Agitation (rpm)                              | 1199            |                                                                                                                    |                                            |                                                          |                                                          | 1.759                                               | 0.016                                                | 0.31           |
| Comment:<br>Catalyst activation: H <sub>2</sub> gas 20 sccm at 303 K for 40 min. |                        |                 |                                              |                 | Analysis of H <sub>2</sub> O <sub>2</sub> formation selectivity and H <sub>2</sub> O <sub>2</sub> destruction rate |                                            |                                                          | S <sub>f</sub> (—)                                       | 0.0238                                              |                                                      |                |
|                                                                                  |                        |                 |                                              |                 |                                                                                                                    |                                            |                                                          | k <sub>d</sub> [Cat] (h <sup>-1</sup> )                  | 1.0077                                              |                                                      |                |
|                                                                                  |                        |                 |                                              |                 |                                                                                                                    |                                            |                                                          | R <sup>2</sup>                                           | 0.7457                                              |                                                      |                |
| GC calibration                                                                   |                        | GC count        |                                              |                 | Ratio of sensitivity (toward N <sub>2</sub> )                                                                      |                                            |                                                          | Feed gas measurement                                     |                                                     |                                                      |                |
| Timing                                                                           | No.                    | H <sub>2</sub>  | O <sub>2</sub>                               | N <sub>2</sub>  | H <sub>2</sub>                                                                                                     | O <sub>2</sub>                             |                                                          |                                                          |                                                     |                                                      |                |
| Before reaction                                                                  | 1                      | 515986          | 200384                                       | 219114          | 0.0891                                                                                                             | 0.0888                                     | 0.817                                                    | T <sub>a</sub> (°C)                                      | 28.9                                                |                                                      |                |
|                                                                                  | 2                      | 516610          | 200503                                       | 219173          | 0.0890                                                                                                             |                                            |                                                          | 0.816                                                    | P <sub>0</sub> (hPa)                                | 1008.0                                               |                |
|                                                                                  | 3                      | 516494          | 200047                                       | 218745          | 0.0889                                                                                                             |                                            |                                                          | 0.816                                                    | Flow (cc/min)                                       |                                                      |                |
| After reaction                                                                   | 4                      | 518385          | 199969                                       | 218990          | 0.0887                                                                                                             |                                            |                                                          | 0.817                                                    | H <sub>2</sub>                                      | 6.00                                                 |                |
|                                                                                  | 5                      | 518781          | 200003                                       | 218972          | 0.0886                                                                                                             |                                            |                                                          | 0.817                                                    | O <sub>2</sub>                                      | 21.34                                                |                |
|                                                                                  | 6                      | 518964          | 200305                                       | 219166          | 0.0886                                                                                                             |                                            |                                                          | 0.817                                                    | N <sub>2</sub>                                      | 28.59                                                |                |
| Time                                                                             |                        |                 |                                              | GC count        |                                                                                                                    |                                            | t <sub>correct</sub> (min)                               | Outlet flow (sccm)                                       |                                                     | Conversion(%)                                        |                |
| H                                                                                | M                      | S               | min.                                         | H <sub>2</sub>  | O <sub>2</sub>                                                                                                     | N <sub>2</sub>                             |                                                          | H <sub>2</sub>                                           | O <sub>2</sub>                                      | H <sub>2</sub>                                       | O <sub>2</sub> |
| 17                                                                               | 41                     | 44              | 4.0                                          | 282772          | 118276                                                                                                             | 290872                                     | 0.00                                                     | 3.49                                                     | 17.57                                               | 32.70                                                | 4.71           |
| 17                                                                               | 51                     | 48              | 14.1                                         | 345704          | 188538                                                                                                             | 228058                                     | 9.73                                                     | 3.53                                                     | 17.60                                               | 31.95                                                | 4.59           |
| 18                                                                               | 1                      | 50              | 24.1                                         | 358711          | 193661                                                                                                             | 222806                                     | 19.77                                                    | 3.57                                                     | 17.62                                               | 31.18                                                | 4.46           |
| 18                                                                               | 11                     | 54              | 34.2                                         | 365054          | 194211                                                                                                             | 222119                                     | 29.83                                                    | 3.61                                                     | 17.64                                               | 30.44                                                | 4.34           |
| 18                                                                               | 21                     | 56              | 44.2                                         | 369450          | 194403                                                                                                             | 221921                                     | 39.87                                                    | 3.65                                                     | 17.68                                               | 29.54                                                | 4.16           |
| 18                                                                               | 32                     | 0               | 54.3                                         | 372456          | 194347                                                                                                             | 221666                                     | 49.93                                                    | 3.69                                                     | 17.69                                               | 28.89                                                | 4.08           |
| 18                                                                               | 42                     | 2               | 64.3                                         | 375082          | 194290                                                                                                             | 221374                                     | 59.97                                                    | 3.72                                                     | 17.71                                               | 28.29                                                | 3.98           |
| 18                                                                               | 52                     | 6               | 74.4                                         | 377109          | 194328                                                                                                             | 221336                                     | 70.03                                                    | 3.74                                                     | 17.72                                               | 27.89                                                | 3.95           |
| 19                                                                               | 2                      | 8               | 84.4                                         | 379154          | 194374                                                                                                             | 221304                                     | 80.07                                                    | 3.76                                                     | 17.72                                               | 27.49                                                | 3.91           |
| 19                                                                               | 12                     | 12              | 94.5                                         | 380867          | 194153                                                                                                             | 221117                                     | 90.13                                                    | 3.78                                                     | 17.72                                               | 27.10                                                | 3.94           |
| 19                                                                               | 22                     | 14              | 104.5                                        | 382404          | 194393                                                                                                             | 221061                                     | 100.17                                                   | 3.80                                                     | 17.74                                               | 26.79                                                | 3.79           |
| 19                                                                               | 32                     | 18              | 114.6                                        | 381321          | 193530                                                                                                             | 220281                                     | 110.23                                                   | 3.80                                                     | 17.73                                               | 26.74                                                | 3.88           |
| 19                                                                               | 42                     | 20              | 124.6                                        | 384256          | 193999                                                                                                             | 220671                                     | 120.27                                                   | 3.82                                                     | 17.74                                               | 26.31                                                | 3.82           |
| t <sub>correct</sub> (min)                                                       | Partial pressure (kPa) |                 | Rate (mmol L <sup>-1</sup> h <sup>-1</sup> ) |                 | d[H <sub>2</sub> O <sub>2</sub> ]/dt (mmol L <sup>-1</sup> h <sup>-1</sup> )                                       | Σ[H <sub>2</sub> ] (mmol L <sup>-1</sup> ) | [H <sub>2</sub> O <sub>2</sub> ] (mmol L <sup>-1</sup> ) | S <sub>e</sub> (—)                                       | Σ <sub>2</sub> [H <sub>2</sub> O <sub>2</sub> ] (h) | Σ <sub>1</sub> /[H <sub>2</sub> O <sub>2</sub> ] (—) |                |
|                                                                                  | P <sub>H2</sub>        | P <sub>O2</sub> | r <sub>H2</sub>                              | r <sub>O2</sub> |                                                                                                                    |                                            |                                                          |                                                          |                                                     |                                                      |                |
| 0.00                                                                             | 7.43                   | 37.40           | 15.14                                        | 7.76            | 0.39                                                                                                               | 0.00                                       | 0.00                                                     |                                                          | 0.000                                               | 0.000                                                |                |
| 9.73                                                                             | 7.50                   | 37.40           | 14.79                                        | 7.56            | 0.32                                                                                                               | 2.43                                       | 0.06                                                     | 0.02                                                     | 0.081                                               | 42.516                                               |                |
| 19.77                                                                            | 7.58                   | 37.40           | 14.44                                        | 7.34            | 0.25                                                                                                               | 4.87                                       | 0.10                                                     | 0.02                                                     | 0.174                                               | 46.761                                               |                |
| 29.83                                                                            | 7.65                   | 37.40           | 14.10                                        | 7.15            | 0.21                                                                                                               | 7.27                                       | 0.14                                                     | 0.02                                                     | 0.273                                               | 51.099                                               |                |
| 39.87                                                                            | 7.73                   | 37.41           | 13.68                                        | 6.86            | 0.03                                                                                                               | 9.59                                       | 0.16                                                     | 0.02                                                     | 0.396                                               | 59.139                                               |                |
| 49.93                                                                            | 7.80                   | 37.40           | 13.38                                        | 6.72            | 0.06                                                                                                               | 11.86                                      | 0.17                                                     | 0.01                                                     | 0.542                                               | 69.754                                               |                |
| 59.97                                                                            | 7.85                   | 37.40           | 13.10                                        | 6.56            | 0.01                                                                                                               | 14.07                                      | 0.18                                                     | 0.01                                                     | 0.686                                               | 79.761                                               |                |
| 70.03                                                                            | 7.89                   | 37.39           | 12.92                                        | 6.50            | 0.08                                                                                                               | 16.25                                      | 0.18                                                     | 0.01                                                     | 0.820                                               | 88.037                                               |                |
| 80.07                                                                            | 7.93                   | 37.38           | 12.73                                        | 6.44            | 0.15                                                                                                               | 18.40                                      | 0.20                                                     | 0.01                                                     | 0.901                                               | 90.174                                               |                |
| 90.13                                                                            | 7.97                   | 37.36           | 12.55                                        | 6.49            | 0.42                                                                                                               | 20.52                                      | 0.25                                                     | 0.01                                                     | 0.882                                               | 81.473                                               |                |
| 100.17                                                                           | 8.00                   | 37.38           | 12.40                                        | 6.25            | 0.09                                                                                                               | 22.60                                      | 0.29                                                     | 0.01                                                     | 0.908                                               | 76.627                                               |                |
| 110.23                                                                           | 8.01                   | 37.36           | 12.38                                        | 6.39            | 0.41                                                                                                               | 24.68                                      | 0.34                                                     | 0.01                                                     | 0.951                                               | 73.205                                               |                |
| 120.27                                                                           | 8.05                   | 37.35           | 12.18                                        | 6.29            | 0.40                                                                                                               | 26.74                                      | 0.40                                                     | 0.02                                                     | 0.945                                               | 66.023                                               |                |

## H<sub>2</sub>O<sub>2</sub> Synthesis Data Sheet

Entry No. 57 (Exp. T022) Employed in: Fig 9

| Catalyst, Additives                                                              |                        |                 | Reaction conditions                          |                 | Gas feed rate (sccm)                                                                                               |                                            |                                                          |                                         |                                                     |                                                      |      |
|----------------------------------------------------------------------------------|------------------------|-----------------|----------------------------------------------|-----------------|--------------------------------------------------------------------------------------------------------------------|--------------------------------------------|----------------------------------------------------------|-----------------------------------------|-----------------------------------------------------|------------------------------------------------------|------|
| Name                                                                             | Conc.                  | (Unit)          | T <sub>0</sub> (°C)                          | 27.1            |                                                                                                                    | H <sub>2</sub>                             | O <sub>2</sub>                                           | N <sub>2</sub>                          | Sum                                                 |                                                      |      |
| Pt-PVP                                                                           | 1.04                   | (mg/L)          | T (°C)                                       | 30.3            | Set                                                                                                                | 7.50                                       | 20.00                                                    | 22.50                                   | 50.00                                               |                                                      |      |
|                                                                                  |                        |                 | P <sub>0</sub> (hPa)                         | 1007.1          | Calibrated                                                                                                         | 7.39                                       | 18.56                                                    | 22.37                                   | 48.32                                               |                                                      |      |
| H <sub>2</sub> SO <sub>4</sub>                                                   | 0.01                   | (N)             | P (hPa)                                      | 1014.7          | Determination of final [H <sub>2</sub> O <sub>2</sub> ]                                                            | Sample (g)                                 | Absorbance (—)                                           | [H <sub>2</sub> O <sub>2</sub> ]        |                                                     |                                                      |      |
|                                                                                  |                        |                 | Agitation (rpm)                              | 1201            |                                                                                                                    |                                            |                                                          | 1.973                                   | 0.027                                               | (mmol L <sup>-1</sup> )                              |      |
| Comment:<br>Catalyst activation: H <sub>2</sub> gas 20 sccm at 303 K for 40 min. |                        |                 |                                              |                 | Analysis of H <sub>2</sub> O <sub>2</sub> formation selectivity and H <sub>2</sub> O <sub>2</sub> destruction rate |                                            |                                                          | S <sub>f</sub> (—)                      | 0.0720                                              |                                                      |      |
|                                                                                  |                        |                 |                                              |                 |                                                                                                                    |                                            |                                                          | k <sub>a</sub> [Cat] (h <sup>-1</sup> ) | 0.0650                                              |                                                      |      |
|                                                                                  |                        |                 |                                              |                 |                                                                                                                    |                                            |                                                          | R <sup>2</sup>                          | 0.7913                                              |                                                      |      |
| GC calibration                                                                   |                        | GC count        |                                              |                 | Ratio of sensitivity (toward N <sub>2</sub> )                                                                      |                                            | Feed gas measurement                                     |                                         |                                                     |                                                      |      |
| Timing                                                                           | No.                    | H <sub>2</sub>  | O <sub>2</sub>                               | N <sub>2</sub>  | H <sub>2</sub>                                                                                                     | O <sub>2</sub>                             |                                                          |                                         |                                                     |                                                      |      |
| Before reaction                                                                  | 1                      | 766204          | 201428                                       | 197929          | 0.0854                                                                                                             | 0.0853                                     | 0.815                                                    | T <sub>a</sub> (°C)                     | 27.1                                                |                                                      |      |
|                                                                                  | 2                      | 766117          | 201323                                       | 197724          | 0.0853                                                                                                             |                                            |                                                          | 0.815                                   | P <sub>0</sub> (hPa)                                | 1007.7                                               |      |
|                                                                                  | 3                      | 766115          | 201379                                       | 197869          | 0.0854                                                                                                             |                                            |                                                          | 0.815                                   | Flow (cc/min)                                       |                                                      |      |
| After reaction                                                                   | 4                      | 763416          | 200693                                       | 197092          | 0.0853                                                                                                             |                                            |                                                          | 0.815                                   | H <sub>2</sub>                                      | 8.47                                                 |      |
|                                                                                  | 5                      | 763365          | 200422                                       | 196981          | 0.0853                                                                                                             |                                            |                                                          | 0.816                                   | O <sub>2</sub>                                      | 21.27                                                |      |
|                                                                                  | 6                      | 763314          | 200653                                       | 197025          | 0.0853                                                                                                             |                                            |                                                          | 0.815                                   | N <sub>2</sub>                                      | 25.63                                                |      |
| Time                                                                             |                        | GC count        |                                              |                 | t <sub>correct</sub> (min)                                                                                         | Outlet flow (sccm)                         |                                                          | Conversion(%)                           |                                                     |                                                      |      |
| H                                                                                | M                      | S               | min.                                         | H <sub>2</sub>  |                                                                                                                    | O <sub>2</sub>                             | N <sub>2</sub>                                           | H <sub>2</sub>                          | O <sub>2</sub>                                      |                                                      |      |
| 15                                                                               | 59                     | 40              | 4.0                                          | 370607          | 119655                                                                                                             | 283876                                     | 0.00                                                     | 4.77                                    | 17.16                                               | 35.47                                                | 7.58 |
| 16                                                                               | 9                      | 44              | 14.1                                         | 509616          | 189659                                                                                                             | 214229                                     | 9.59                                                     | 4.81                                    | 17.18                                               | 34.97                                                | 7.46 |
| 16                                                                               | 19                     | 46              | 24.1                                         | 524227          | 195260                                                                                                             | 208158                                     | 19.63                                                    | 4.85                                    | 17.20                                               | 34.46                                                | 7.34 |
| 16                                                                               | 29                     | 50              | 34.2                                         | 530133          | 195740                                                                                                             | 207251                                     | 29.69                                                    | 4.88                                    | 17.22                                               | 33.96                                                | 7.22 |
| 16                                                                               | 39                     | 52              | 44.2                                         | 533811          | 195621                                                                                                             | 206815                                     | 39.73                                                    | 4.93                                    | 17.25                                               | 33.36                                                | 7.08 |
| 16                                                                               | 49                     | 56              | 54.3                                         | 536310          | 195464                                                                                                             | 206403                                     | 49.79                                                    | 4.96                                    | 17.27                                               | 32.92                                                | 6.97 |
| 16                                                                               | 59                     | 58              | 64.3                                         | 537830          | 195061                                                                                                             | 205907                                     | 59.83                                                    | 4.98                                    | 17.28                                               | 32.57                                                | 6.94 |
| 17                                                                               | 10                     | 2               | 74.4                                         | 540281          | 195073                                                                                                             | 205712                                     | 69.89                                                    | 5.01                                    | 17.29                                               | 32.19                                                | 6.85 |
| 17                                                                               | 20                     | 4               | 84.4                                         | 542618          | 195029                                                                                                             | 205571                                     | 79.93                                                    | 5.04                                    | 17.30                                               | 31.85                                                | 6.80 |
| 17                                                                               | 30                     | 8               | 94.5                                         | 544950          | 195428                                                                                                             | 205851                                     | 89.99                                                    | 5.05                                    | 17.31                                               | 31.65                                                | 6.74 |
| 17                                                                               | 40                     | 10              | 104.5                                        | 546644          | 195578                                                                                                             | 205752                                     | 100.03                                                   | 5.07                                    | 17.33                                               | 31.41                                                | 6.62 |
| 17                                                                               | 50                     | 12              | 114.5                                        | 547977          | 195384                                                                                                             | 205573                                     | 110.06                                                   | 5.09                                    | 17.33                                               | 31.18                                                | 6.63 |
| 18                                                                               | 0                      | 16              | 124.6                                        | 547782          | 195035                                                                                                             | 204990                                     | 120.13                                                   | 5.10                                    | 17.35                                               | 31.01                                                | 6.54 |
| t <sub>correct</sub> (min)                                                       | Partial pressure (kPa) |                 | Rate (mmol L <sup>-1</sup> h <sup>-1</sup> ) |                 | d[H <sub>2</sub> O <sub>2</sub> ]/dt (mmol L <sup>-1</sup> h <sup>-1</sup> )                                       | Σ[H <sub>2</sub> ] (mmol L <sup>-1</sup> ) | [H <sub>2</sub> O <sub>2</sub> ] (mmol L <sup>-1</sup> ) | S <sub>e</sub> (—)                      | Σ <sub>2</sub> [H <sub>2</sub> O <sub>2</sub> ] (h) | Σ <sub>1</sub> /[H <sub>2</sub> O <sub>2</sub> ] (—) |      |
|                                                                                  | P <sub>H2</sub>        | P <sub>O2</sub> | r <sub>H2</sub>                              | r <sub>O2</sub> |                                                                                                                    |                                            |                                                          |                                         |                                                     |                                                      |      |
| 0.00                                                                             | 10.47                  | 37.66           | 23.41                                        | 12.57           | 1.73                                                                                                               | 0.00                                       | 0.00                                                     |                                         | 0.000                                               | 0.000                                                |      |
| 9.59                                                                             | 10.54                  | 37.65           | 23.08                                        | 12.37           | 1.66                                                                                                               | 3.72                                       | 0.27                                                     | 0.07                                    | 0.080                                               | 13.735                                               |      |
| 19.63                                                                            | 10.61                  | 37.65           | 22.74                                        | 12.17           | 1.59                                                                                                               | 7.55                                       | 0.54                                                     | 0.07                                    | 0.165                                               | 13.918                                               |      |
| 29.69                                                                            | 10.67                  | 37.65           | 22.42                                        | 11.97           | 1.52                                                                                                               | 11.34                                      | 0.80                                                     | 0.07                                    | 0.252                                               | 14.112                                               |      |
| 39.73                                                                            | 10.75                  | 37.65           | 22.02                                        | 11.74           | 1.45                                                                                                               | 15.05                                      | 1.05                                                     | 0.07                                    | 0.340                                               | 14.308                                               |      |
| 49.79                                                                            | 10.81                  | 37.65           | 21.73                                        | 11.55           | 1.38                                                                                                               | 18.72                                      | 1.29                                                     | 0.07                                    | 0.430                                               | 14.515                                               |      |
| 59.83                                                                            | 10.86                  | 37.64           | 21.49                                        | 11.50           | 1.51                                                                                                               | 22.34                                      | 1.53                                                     | 0.07                                    | 0.516                                               | 14.586                                               |      |
| 69.89                                                                            | 10.91                  | 37.64           | 21.25                                        | 11.35           | 1.44                                                                                                               | 25.92                                      | 1.78                                                     | 0.07                                    | 0.600                                               | 14.573                                               |      |
| 79.93                                                                            | 10.96                  | 37.63           | 21.02                                        | 11.27           | 1.52                                                                                                               | 29.46                                      | 2.03                                                     | 0.07                                    | 0.684                                               | 14.534                                               |      |
| 89.99                                                                            | 10.98                  | 37.63           | 20.89                                        | 11.17           | 1.44                                                                                                               | 32.97                                      | 2.28                                                     | 0.07                                    | 0.768                                               | 14.488                                               |      |
| 100.03                                                                           | 11.01                  | 37.64           | 20.73                                        | 10.98           | 1.22                                                                                                               | 36.45                                      | 2.50                                                     | 0.07                                    | 0.859                                               | 14.589                                               |      |
| 110.06                                                                           | 11.04                  | 37.63           | 20.58                                        | 10.99           | 1.41                                                                                                               | 39.91                                      | 2.72                                                     | 0.07                                    | 0.950                                               | 14.680                                               |      |
| 120.13                                                                           | 11.06                  | 37.64           | 20.47                                        | 10.83           | 1.20                                                                                                               | 43.35                                      | 2.94                                                     | 0.07                                    | 1.041                                               | 14.760                                               |      |

## H<sub>2</sub>O<sub>2</sub> Synthesis Data Sheet

Entry No. 58 (Exp. T027) Employed in: Fig 9

| Catalyst, Additives                                                              |                        |                 | Reaction conditions                          |                 | Gas feed rate (sccm)                                                                                               |                                            |                                                          |                                                          |                                                     |                                                      |                |
|----------------------------------------------------------------------------------|------------------------|-----------------|----------------------------------------------|-----------------|--------------------------------------------------------------------------------------------------------------------|--------------------------------------------|----------------------------------------------------------|----------------------------------------------------------|-----------------------------------------------------|------------------------------------------------------|----------------|
| Name                                                                             | Conc.                  | (Unit)          | T <sub>0</sub> (°C)                          | 27.0            |                                                                                                                    | H <sub>2</sub>                             | O <sub>2</sub>                                           | N <sub>2</sub>                                           | Sum                                                 |                                                      |                |
| Pt-PVP                                                                           | 1.04                   | (mg/L)          | T (°C)                                       | 30.3            | Set                                                                                                                | 10.00                                      | 17.50                                                    | 22.50                                                    | 50.00                                               |                                                      |                |
|                                                                                  |                        |                 | P <sub>0</sub> (hPa)                         | 999.5           | Calibrated                                                                                                         | 9.98                                       | 16.22                                                    | 22.37                                                    | 48.58                                               |                                                      |                |
| H <sub>2</sub> SO <sub>4</sub>                                                   | 0.01                   | (N)             | P (hPa)                                      | 1006.7          | Determination of final [H <sub>2</sub> O <sub>2</sub> ]                                                            | Sample (g)                                 | Absorbance (—)                                           | [H <sub>2</sub> O <sub>2</sub> ] (mmol L <sup>-1</sup> ) |                                                     |                                                      |                |
|                                                                                  |                        |                 | Agitation (rpm)                              | 1201            |                                                                                                                    |                                            |                                                          |                                                          | 1.641                                               | 0.028                                                | 0.59           |
| Comment:<br>Catalyst activation: H <sub>2</sub> gas 20 sccm at 303 K for 40 min. |                        |                 |                                              |                 | Analysis of H <sub>2</sub> O <sub>2</sub> formation selectivity and H <sub>2</sub> O <sub>2</sub> destruction rate |                                            |                                                          | S <sub>f</sub> (—)                                       | 0.0494                                              |                                                      |                |
|                                                                                  |                        |                 |                                              |                 |                                                                                                                    |                                            |                                                          | k <sub>d</sub> [Cat] (h <sup>-1</sup> )                  | -0.0379                                             |                                                      |                |
|                                                                                  |                        |                 |                                              |                 |                                                                                                                    |                                            |                                                          | R <sup>2</sup>                                           | 0.3051                                              |                                                      |                |
| GC calibration                                                                   |                        | GC count        |                                              |                 | Ratio of sensitivity (toward N <sub>2</sub> )                                                                      |                                            | Feed gas measurement                                     |                                                          |                                                     |                                                      |                |
| Timing                                                                           | No.                    | H <sub>2</sub>  | O <sub>2</sub>                               | N <sub>2</sub>  | H <sub>2</sub>                                                                                                     | O <sub>2</sub>                             |                                                          |                                                          |                                                     |                                                      |                |
| Before reaction                                                                  | 1                      | 999182          | 175146                                       | 196622          | 0.0878                                                                                                             | 0.0878                                     | 0.814                                                    | T <sub>a</sub> (°C)                                      | 27.0                                                |                                                      |                |
|                                                                                  | 2                      | 999470          | 175244                                       | 196618          | 0.0878                                                                                                             |                                            |                                                          | 0.814                                                    | P <sub>0</sub> (hPa)                                | 999.4                                                |                |
|                                                                                  | 3                      | 999253          | 175196                                       | 196504          | 0.0877                                                                                                             |                                            |                                                          | 0.813                                                    | Flow (cc/min)                                       |                                                      |                |
| After reaction                                                                   | 4                      | 995875          | 174320                                       | 195749          | 0.0877                                                                                                             | 0.0878                                     | 0.814                                                    | H <sub>2</sub>                                           | 11.53                                               |                                                      |                |
|                                                                                  | 5                      | 996381          | 174698                                       | 195926          | 0.0877                                                                                                             |                                            |                                                          | 0.813                                                    | O <sub>2</sub>                                      | 18.74                                                |                |
|                                                                                  | 6                      | 996149          | 174493                                       | 195845          | 0.0877                                                                                                             |                                            |                                                          | 0.814                                                    | N <sub>2</sub>                                      | 25.84                                                |                |
| Time                                                                             |                        |                 |                                              | GC count        |                                                                                                                    |                                            | t <sub>correct</sub> (min)                               | Outlet flow (sccm)                                       |                                                     | Conversion(%)                                        |                |
| H                                                                                | M                      | S               | min.                                         | H <sub>2</sub>  | O <sub>2</sub>                                                                                                     | N <sub>2</sub>                             |                                                          | H <sub>2</sub>                                           | O <sub>2</sub>                                      | H <sub>2</sub>                                       | O <sub>2</sub> |
| 15                                                                               | 32                     | 8               | 4.0                                          | 479460          | 102594                                                                                                             | 288156                                     | 0.00                                                     | 5.79                                                     | 14.03                                               | 42.00                                                | 13.53          |
| 15                                                                               | 42                     | 12              | 14.1                                         | 628233          | 162701                                                                                                             | 225261                                     | 9.41                                                     | 5.84                                                     | 14.05                                               | 41.46                                                | 13.38          |
| 15                                                                               | 52                     | 14              | 24.1                                         | 649983          | 168012                                                                                                             | 218920                                     | 19.45                                                    | 5.90                                                     | 14.08                                               | 40.90                                                | 13.22          |
| 16                                                                               | 2                      | 18              | 34.2                                         | 660322          | 168572                                                                                                             | 217680                                     | 29.51                                                    | 5.96                                                     | 14.10                                               | 40.34                                                | 13.10          |
| 16                                                                               | 12                     | 0               | 43.9                                         | 664622          | 168496                                                                                                             | 216878                                     | 39.21                                                    | 6.02                                                     | 14.15                                               | 39.73                                                | 12.82          |
| 16                                                                               | 22                     | 22              | 54.2                                         | 669486          | 168314                                                                                                             | 216534                                     | 49.58                                                    | 6.07                                                     | 14.15                                               | 39.20                                                | 12.77          |
| 16                                                                               | 32                     | 26              | 64.3                                         | 671704          | 168427                                                                                                             | 216008                                     | 59.65                                                    | 6.10                                                     | 14.20                                               | 38.85                                                | 12.50          |
| 16                                                                               | 42                     | 28              | 74.3                                         | 672934          | 168082                                                                                                             | 215597                                     | 69.68                                                    | 6.13                                                     | 14.19                                               | 38.62                                                | 12.51          |
| 16                                                                               | 52                     | 32              | 84.4                                         | 674966          | 168172                                                                                                             | 215325                                     | 79.75                                                    | 6.15                                                     | 14.22                                               | 38.35                                                | 12.36          |
| 17                                                                               | 2                      | 34              | 94.4                                         | 677969          | 168160                                                                                                             | 215128                                     | 89.78                                                    | 6.19                                                     | 14.23                                               | 38.02                                                | 12.28          |
| 17                                                                               | 12                     | 38              | 104.5                                        | 680056          | 168257                                                                                                             | 215032                                     | 99.85                                                    | 6.21                                                     | 14.25                                               | 37.80                                                | 12.19          |
| 17                                                                               | 22                     | 40              | 114.5                                        | 681591          | 168119                                                                                                             | 214673                                     | 109.88                                                   | 6.23                                                     | 14.26                                               | 37.56                                                | 12.12          |
| 17                                                                               | 32                     | 44              | 124.6                                        | 680742          | 168001                                                                                                             | 214570                                     | 119.95                                                   | 6.23                                                     | 14.26                                               | 37.61                                                | 12.14          |
| t <sub>correct</sub> (min)                                                       | Partial pressure (kPa) |                 | Rate (mmol L <sup>-1</sup> h <sup>-1</sup> ) |                 | d[H <sub>2</sub> O <sub>2</sub> ]/dt (mmol L <sup>-1</sup> h <sup>-1</sup> )                                       | Σ[H <sub>2</sub> ] (mmol L <sup>-1</sup> ) | [H <sub>2</sub> O <sub>2</sub> ] (mmol L <sup>-1</sup> ) | S <sub>e</sub> (—)                                       | Σ <sub>2</sub> [H <sub>2</sub> O <sub>2</sub> ] (h) | Σ <sub>1</sub> /[H <sub>2</sub> O <sub>2</sub> ] (—) |                |
|                                                                                  | P <sub>H2</sub>        | P <sub>O2</sub> | r <sub>H2</sub>                              | r <sub>O2</sub> |                                                                                                                    |                                            |                                                          |                                                          |                                                     |                                                      |                |
| 0.00                                                                             | 13.23                  | 32.06           | 37.43                                        | 19.60           | 1.76                                                                                                               | 0.00                                       | 0.00                                                     |                                                          | 0.000                                               | 0.000                                                |                |
| 9.41                                                                             | 13.33                  | 32.06           | 36.96                                        | 19.38           | 1.80                                                                                                               | 5.84                                       | 0.28                                                     | 0.05                                                     | 0.078                                               | 20.867                                               |                |
| 19.45                                                                            | 13.43                  | 32.06           | 36.45                                        | 19.15           | 1.84                                                                                                               | 11.97                                      | 0.58                                                     | 0.05                                                     | 0.161                                               | 20.484                                               |                |
| 29.51                                                                            | 13.53                  | 32.05           | 35.96                                        | 18.98           | 1.99                                                                                                               | 18.05                                      | 0.91                                                     | 0.05                                                     | 0.242                                               | 19.912                                               |                |
| 39.21                                                                            | 13.64                  | 32.07           | 35.41                                        | 18.57           | 1.72                                                                                                               | 23.82                                      | 1.21                                                     | 0.05                                                     | 0.323                                               | 19.741                                               |                |
| 49.58                                                                            | 13.74                  | 32.04           | 34.94                                        | 18.50           | 2.07                                                                                                               | 29.90                                      | 1.53                                                     | 0.05                                                     | 0.409                                               | 19.489                                               |                |
| 59.65                                                                            | 13.80                  | 32.08           | 34.62                                        | 18.11           | 1.60                                                                                                               | 35.73                                      | 1.84                                                     | 0.05                                                     | 0.494                                               | 19.402                                               |                |
| 69.68                                                                            | 13.84                  | 32.06           | 34.42                                        | 18.13           | 1.84                                                                                                               | 41.50                                      | 2.13                                                     | 0.05                                                     | 0.583                                               | 19.496                                               |                |
| 79.75                                                                            | 13.88                  | 32.08           | 34.19                                        | 17.90           | 1.62                                                                                                               | 47.26                                      | 2.42                                                     | 0.05                                                     | 0.671                                               | 19.540                                               |                |
| 89.78                                                                            | 13.94                  | 32.07           | 33.89                                        | 17.79           | 1.70                                                                                                               | 52.95                                      | 2.70                                                     | 0.05                                                     | 0.761                                               | 19.643                                               |                |
| 99.85                                                                            | 13.98                  | 32.08           | 33.70                                        | 17.66           | 1.63                                                                                                               | 58.62                                      | 2.97                                                     | 0.05                                                     | 0.849                                               | 19.705                                               |                |
| 109.88                                                                           | 14.02                  | 32.08           | 33.48                                        | 17.56           | 1.63                                                                                                               | 64.24                                      | 3.25                                                     | 0.05                                                     | 0.938                                               | 19.778                                               |                |
| 119.95                                                                           | 14.02                  | 32.08           | 33.52                                        | 17.58           | 1.65                                                                                                               | 69.86                                      | 3.52                                                     | 0.05                                                     | 1.026                                               | 19.828                                               |                |

## H<sub>2</sub>O<sub>2</sub> Synthesis Data Sheet

Entry No. 59 (Exp. T019) Employed in: Fig 9

| Catalyst, Additives                                                              |                        |                 | Reaction conditions                          |                 | Gas feed rate (sccm)                                                                                               |                                            |                                                          |                                         |                                                     |                                                      |                |
|----------------------------------------------------------------------------------|------------------------|-----------------|----------------------------------------------|-----------------|--------------------------------------------------------------------------------------------------------------------|--------------------------------------------|----------------------------------------------------------|-----------------------------------------|-----------------------------------------------------|------------------------------------------------------|----------------|
| Name                                                                             | Conc.                  | (Unit)          | T <sub>0</sub> (°C)                          | 28.7            |                                                                                                                    | H <sub>2</sub>                             | O <sub>2</sub>                                           | N <sub>2</sub>                          | Sum                                                 |                                                      |                |
| Pt-PVP                                                                           | 1.04                   | (mg/L)          | T (°C)                                       | 30.4            | Set                                                                                                                | 10.00                                      | 20.00                                                    | 20.00                                   | 50.00                                               |                                                      |                |
|                                                                                  |                        |                 | P <sub>0</sub> (hPa)                         | 1011.0          | Calibrated                                                                                                         | 10.17                                      | 18.56                                                    | 20.02                                   | 48.74                                               |                                                      |                |
| H <sub>2</sub> SO <sub>4</sub>                                                   | 0.01                   | (N)             | P (hPa)                                      | 1018.4          | Determination of final [H <sub>2</sub> O <sub>2</sub> ]                                                            | Sample (g)                                 | Absorbance (—)                                           | [H <sub>2</sub> O <sub>2</sub> ]        |                                                     |                                                      |                |
|                                                                                  |                        |                 | Agitation (rpm)                              | 1198            |                                                                                                                    |                                            |                                                          | 1.822                                   | 0.038                                               | (mmol L <sup>-1</sup> )                              | 0.72           |
| Comment:<br>Catalyst activation: H <sub>2</sub> gas 20 sccm at 303 K for 40 min. |                        |                 |                                              |                 | Analysis of H <sub>2</sub> O <sub>2</sub> formation selectivity and H <sub>2</sub> O <sub>2</sub> destruction rate |                                            |                                                          | S <sub>f</sub> (—)                      | 0.0414                                              |                                                      |                |
|                                                                                  |                        |                 |                                              |                 |                                                                                                                    |                                            |                                                          | k <sub>d</sub> [Cat] (h <sup>-1</sup> ) | 0.1319                                              |                                                      |                |
|                                                                                  |                        |                 |                                              |                 |                                                                                                                    |                                            |                                                          | R <sup>2</sup>                          | 0.9071                                              |                                                      |                |
| GC calibration                                                                   |                        | GC count        |                                              |                 | Ratio of sensitivity (toward N <sub>2</sub> )                                                                      |                                            | Feed gas measurement                                     |                                         |                                                     |                                                      |                |
| Timing                                                                           | No.                    | H <sub>2</sub>  | O <sub>2</sub>                               | N <sub>2</sub>  | H <sub>2</sub>                                                                                                     | O <sub>2</sub>                             |                                                          |                                         |                                                     |                                                      |                |
| Before reaction                                                                  | 1                      | 996645          | 199425                                       | 175476          | 0.0894                                                                                                             | 0.0891                                     | 0.816                                                    | T <sub>a</sub> (°C)                     | 29.1                                                |                                                      |                |
|                                                                                  | 2                      | 996941          | 199395                                       | 175339          | 0.0893                                                                                                             |                                            |                                                          | 0.815                                   | P <sub>0</sub> (hPa)                                | 1010.9                                               |                |
|                                                                                  | 3                      | 997308          | 199253                                       | 175350          | 0.0893                                                                                                             |                                            |                                                          | 0.816                                   | Flow (cc/min)                                       |                                                      |                |
| After reaction                                                                   | 4                      | 995860          | 198101                                       | 174466          | 0.0890                                                                                                             |                                            |                                                          | 0.816                                   | H <sub>2</sub>                                      | 11.74                                                |                |
|                                                                                  | 5                      | 996842          | 198486                                       | 174636          | 0.0890                                                                                                             |                                            |                                                          | 0.816                                   | O <sub>2</sub>                                      | 21.43                                                |                |
|                                                                                  | 6                      | 997342          | 198496                                       | 174707          | 0.0890                                                                                                             |                                            |                                                          | 0.816                                   | N <sub>2</sub>                                      | 23.12                                                |                |
| Time                                                                             |                        |                 |                                              | GC count        |                                                                                                                    |                                            | t <sub>correct</sub> (min)                               | Outlet flow (sccm)                      |                                                     | Conversion(%)                                        |                |
| H                                                                                | M                      | S               | min.                                         | H <sub>2</sub>  | O <sub>2</sub>                                                                                                     | N <sub>2</sub>                             |                                                          | H <sub>2</sub>                          | O <sub>2</sub>                                      | H <sub>2</sub>                                       | O <sub>2</sub> |
| 17                                                                               | 39                     | 16              | 4.0                                          | 502789          | 120532                                                                                                             | 267211                                     | 0.00                                                     | 6.37                                    | 16.58                                               | 37.38                                                | 10.66          |
| 17                                                                               | 49                     | 20              | 14.1                                         | 671597          | 187588                                                                                                             | 196597                                     | 9.46                                                     | 6.43                                    | 16.61                                               | 36.74                                                | 10.47          |
| 17                                                                               | 59                     | 22              | 24.1                                         | 684039          | 193213                                                                                                             | 191033                                     | 19.49                                                    | 6.50                                    | 16.65                                               | 36.07                                                | 10.27          |
| 18                                                                               | 9                      | 26              | 34.2                                         | 696496          | 193539                                                                                                             | 189480                                     | 29.56                                                    | 6.56                                    | 16.68                                               | 35.47                                                | 10.12          |
| 18                                                                               | 19                     | 28              | 44.2                                         | 703628          | 193398                                                                                                             | 188657                                     | 39.59                                                    | 6.66                                    | 16.74                                               | 34.52                                                | 9.79           |
| 18                                                                               | 29                     | 32              | 54.3                                         | 707982          | 193496                                                                                                             | 188591                                     | 49.66                                                    | 6.70                                    | 16.75                                               | 34.10                                                | 9.71           |
| 18                                                                               | 39                     | 34              | 64.3                                         | 712145          | 193641                                                                                                             | 188242                                     | 59.69                                                    | 6.75                                    | 16.80                                               | 33.59                                                | 9.48           |
| 18                                                                               | 49                     | 38              | 74.4                                         | 715039          | 193704                                                                                                             | 188213                                     | 69.76                                                    | 6.78                                    | 16.81                                               | 33.31                                                | 9.43           |
| 18                                                                               | 59                     | 40              | 84.4                                         | 727471          | 193853                                                                                                             | 187454                                     | 79.79                                                    | 6.93                                    | 16.89                                               | 31.87                                                | 9.00           |
| 19                                                                               | 9                      | 44              | 94.5                                         | 729140          | 193591                                                                                                             | 187147                                     | 89.86                                                    | 6.95                                    | 16.89                                               | 31.60                                                | 8.97           |
| 19                                                                               | 19                     | 46              | 104.5                                        | 731591          | 193635                                                                                                             | 187087                                     | 99.89                                                    | 6.98                                    | 16.90                                               | 31.35                                                | 8.92           |
| 19                                                                               | 29                     | 50              | 114.6                                        | 731911          | 193472                                                                                                             | 186873                                     | 109.96                                                   | 6.99                                    | 16.91                                               | 31.24                                                | 8.89           |
| 19                                                                               | 39                     | 52              | 124.6                                        | 730170          | 192650                                                                                                             | 186011                                     | 119.99                                                   | 7.01                                    | 16.91                                               | 31.09                                                | 8.86           |
| t <sub>correct</sub> (min)                                                       | Partial pressure (kPa) |                 | Rate (mmol L <sup>-1</sup> h <sup>-1</sup> ) |                 | d[H <sub>2</sub> O <sub>2</sub> ]/dt (mmol L <sup>-1</sup> h <sup>-1</sup> )                                       | Σ[H <sub>2</sub> ] (mmol L <sup>-1</sup> ) | [H <sub>2</sub> O <sub>2</sub> ] (mmol L <sup>-1</sup> ) | S <sub>e</sub> (—)                      | Σ <sub>2</sub> [H <sub>2</sub> O <sub>2</sub> ] (h) | Σ <sub>1</sub> /[H <sub>2</sub> O <sub>2</sub> ] (—) |                |
|                                                                                  | P <sub>H2</sub>        | P <sub>O2</sub> | r <sub>H2</sub>                              | r <sub>O2</sub> |                                                                                                                    |                                            |                                                          |                                         |                                                     |                                                      |                |
| 0.00                                                                             | 14.46                  | 37.66           | 33.93                                        | 17.66           | 1.40                                                                                                               | 0.00                                       | 0.00                                                     |                                         | 0.000                                               | 0.000                                                |                |
| 9.46                                                                             | 14.57                  | 37.65           | 33.35                                        | 17.35           | 1.35                                                                                                               | 5.30                                       | 0.22                                                     | 0.04                                    | 0.079                                               | 24.459                                               |                |
| 19.49                                                                            | 14.69                  | 37.64           | 32.73                                        | 17.02           | 1.31                                                                                                               | 10.83                                      | 0.44                                                     | 0.04                                    | 0.164                                               | 24.635                                               |                |
| 29.56                                                                            | 14.80                  | 37.63           | 32.19                                        | 16.76           | 1.32                                                                                                               | 16.27                                      | 0.66                                                     | 0.04                                    | 0.249                                               | 24.642                                               |                |
| 39.59                                                                            | 14.96                  | 37.63           | 31.34                                        | 16.22           | 1.10                                                                                                               | 21.59                                      | 0.86                                                     | 0.04                                    | 0.338                                               | 25.011                                               |                |
| 49.66                                                                            | 15.04                  | 37.61           | 30.95                                        | 16.09           | 1.23                                                                                                               | 26.81                                      | 1.06                                                     | 0.04                                    | 0.428                                               | 25.323                                               |                |
| 59.69                                                                            | 15.12                  | 37.63           | 30.48                                        | 15.70           | 0.92                                                                                                               | 31.95                                      | 1.24                                                     | 0.04                                    | 0.521                                               | 25.796                                               |                |
| 69.76                                                                            | 15.18                  | 37.62           | 30.23                                        | 15.63           | 1.03                                                                                                               | 37.04                                      | 1.40                                                     | 0.04                                    | 0.618                                               | 26.429                                               |                |
| 79.79                                                                            | 15.42                  | 37.60           | 28.93                                        | 14.90           | 0.88                                                                                                               | 41.99                                      | 1.56                                                     | 0.04                                    | 0.714                                               | 26.895                                               |                |
| 89.86                                                                            | 15.47                  | 37.59           | 28.68                                        | 14.86           | 1.04                                                                                                               | 46.82                                      | 1.72                                                     | 0.04                                    | 0.807                                               | 27.185                                               |                |
| 99.89                                                                            | 15.52                  | 37.58           | 28.46                                        | 14.78           | 1.10                                                                                                               | 51.60                                      | 1.90                                                     | 0.04                                    | 0.890                                               | 27.138                                               |                |
| 109.96                                                                           | 15.54                  | 37.58           | 28.36                                        | 14.73           | 1.11                                                                                                               | 56.36                                      | 2.09                                                     | 0.04                                    | 0.971                                               | 27.008                                               |                |
| 119.99                                                                           | 15.56                  | 37.57           | 28.22                                        | 14.68           | 1.14                                                                                                               | 61.09                                      | 2.27                                                     | 0.04                                    | 1.051                                               | 26.855                                               |                |

## H<sub>2</sub>O<sub>2</sub> Synthesis Data Sheet

Entry No. 60 (Exp. T023) Employed in: Fig 9

| Catalyst, Additives                                                              |                        |                 | Reaction conditions                          |                 | Gas feed rate (sccm)                                                                                               |                                            |                                                          |                                         |                                                     |                                                      |                |
|----------------------------------------------------------------------------------|------------------------|-----------------|----------------------------------------------|-----------------|--------------------------------------------------------------------------------------------------------------------|--------------------------------------------|----------------------------------------------------------|-----------------------------------------|-----------------------------------------------------|------------------------------------------------------|----------------|
| Name                                                                             | Conc.                  | (Unit)          | T <sub>0</sub> (°C)                          | 26.4            |                                                                                                                    | H <sub>2</sub>                             | O <sub>2</sub>                                           | N <sub>2</sub>                          | Sum                                                 |                                                      |                |
| Pt-PVP                                                                           | 1.04                   | (mg/L)          | T (°C)                                       | 30.2            | Set                                                                                                                | 12.50                                      | 20.00                                                    | 17.50                                   | 50.00                                               |                                                      |                |
|                                                                                  |                        |                 | P <sub>0</sub> (hPa)                         | 994.8           | Calibrated                                                                                                         | 12.62                                      | 18.66                                                    | 17.51                                   | 48.78                                               |                                                      |                |
| H <sub>2</sub> SO <sub>4</sub>                                                   | 0.01                   | (N)             | P (hPa)                                      | 1001.8          | Determination of final [H <sub>2</sub> O <sub>2</sub> ]                                                            | Sample (g)                                 | Absorbance (—)                                           | [H <sub>2</sub> O <sub>2</sub> ]        |                                                     |                                                      |                |
|                                                                                  |                        |                 | Agitation (rpm)                              | 1200            |                                                                                                                    |                                            |                                                          | 1.805                                   | 0.031                                               | (mmol L <sup>-1</sup> )                              | 0.59           |
| Comment:<br>Catalyst activation: H <sub>2</sub> gas 20 sccm at 303 K for 40 min. |                        |                 |                                              |                 | Analysis of H <sub>2</sub> O <sub>2</sub> formation selectivity and H <sub>2</sub> O <sub>2</sub> destruction rate |                                            |                                                          | S <sub>f</sub> (—)                      | 0.0493                                              |                                                      |                |
|                                                                                  |                        |                 |                                              |                 |                                                                                                                    |                                            |                                                          | k <sub>d</sub> [Cat] (h <sup>-1</sup> ) | 0.1099                                              |                                                      |                |
|                                                                                  |                        |                 |                                              |                 |                                                                                                                    |                                            |                                                          | R <sup>2</sup>                          | 0.9421                                              |                                                      |                |
| GC calibration                                                                   |                        | GC count        |                                              |                 | Ratio of sensitivity (toward N <sub>2</sub> )                                                                      |                                            | Feed gas measurement                                     |                                         |                                                     |                                                      |                |
| Timing                                                                           | No.                    | H <sub>2</sub>  | O <sub>2</sub>                               | N <sub>2</sub>  | H <sub>2</sub>                                                                                                     | O <sub>2</sub>                             |                                                          |                                         |                                                     |                                                      |                |
| Before reaction                                                                  | 1                      | 1229607         | 200373                                       | 153836          | 0.0902                                                                                                             | 0.0898                                     | 0.818                                                    | T <sub>a</sub> (°C)                     | 26.4                                                |                                                      |                |
|                                                                                  | 2                      | 1230323         | 200251                                       | 153693          | 0.0900                                                                                                             |                                            |                                                          | 0.818                                   | P <sub>0</sub> (hPa)                                | 993.9                                                |                |
|                                                                                  | 3                      | 1230261         | 200146                                       | 153533          | 0.0899                                                                                                             |                                            |                                                          | 0.817                                   | Flow (cc/min)                                       |                                                      |                |
| After reaction                                                                   | 4                      | 1226056         | 198613                                       | 152386          | 0.0896                                                                                                             | 0.0898                                     | 0.818                                                    | H <sub>2</sub>                          | 14.61                                               |                                                      |                |
|                                                                                  | 5                      | 1226749         | 198712                                       | 152457          | 0.0896                                                                                                             |                                            |                                                          | 0.818                                   | O <sub>2</sub>                                      | 21.60                                                |                |
|                                                                                  | 6                      | 1226702         | 198594                                       | 152323          | 0.0895                                                                                                             |                                            |                                                          | 0.817                                   | N <sub>2</sub>                                      | 20.27                                                |                |
| Time                                                                             |                        |                 |                                              | GC count        |                                                                                                                    |                                            | t <sub>correct</sub> (min)                               | Outlet flow (sccm)                      |                                                     | Conversion(%)                                        |                |
| H                                                                                | M                      | S               | min.                                         | H <sub>2</sub>  | O <sub>2</sub>                                                                                                     | N <sub>2</sub>                             |                                                          | H <sub>2</sub>                          | O <sub>2</sub>                                      | H <sub>2</sub>                                       | O <sub>2</sub> |
| 17                                                                               | 16                     | 54              | 4.0                                          | 629387          | 120189                                                                                                             | 259721                                     | 0.00                                                     | 7.60                                    | 16.02                                               | 39.79                                                | 14.13          |
| 17                                                                               | 26                     | 56              | 14.0                                         | 826785          | 190108                                                                                                             | 184186                                     | 9.28                                                     | 7.64                                    | 16.04                                               | 39.46                                                | 14.00          |
| 17                                                                               | 37                     | 0               | 24.1                                         | 851246          | 196180                                                                                                             | 176180                                     | 19.35                                                    | 7.69                                    | 16.07                                               | 39.10                                                | 13.85          |
| 17                                                                               | 47                     | 2               | 34.1                                         | 859647          | 196721                                                                                                             | 174944                                     | 29.38                                                    | 7.73                                    | 16.10                                               | 38.78                                                | 13.72          |
| 17                                                                               | 57                     | 4               | 44.2                                         | 864084          | 196568                                                                                                             | 174431                                     | 39.41                                                    | 7.79                                    | 16.13                                               | 38.28                                                | 13.53          |
| 18                                                                               | 7                      | 8               | 54.2                                         | 865715          | 196432                                                                                                             | 174095                                     | 49.48                                                    | 7.82                                    | 16.15                                               | 38.04                                                | 13.42          |
| 18                                                                               | 17                     | 10              | 64.3                                         | 865759          | 196065                                                                                                             | 173605                                     | 59.51                                                    | 7.84                                    | 16.17                                               | 37.87                                                | 13.34          |
| 18                                                                               | 27                     | 14              | 74.3                                         | 870400          | 195981                                                                                                             | 173219                                     | 69.58                                                    | 7.90                                    | 16.20                                               | 37.39                                                | 13.19          |
| 18                                                                               | 37                     | 16              | 84.4                                         | 871761          | 195917                                                                                                             | 173144                                     | 79.61                                                    | 7.92                                    | 16.20                                               | 37.27                                                | 13.18          |
| 18                                                                               | 47                     | 20              | 94.4                                         | 872915          | 195911                                                                                                             | 172968                                     | 89.68                                                    | 7.93                                    | 16.21                                               | 37.12                                                | 13.09          |
| 18                                                                               | 57                     | 22              | 104.5                                        | 873904          | 195715                                                                                                             | 172653                                     | 99.71                                                    | 7.96                                    | 16.23                                               | 36.93                                                | 13.02          |
| 19                                                                               | 7                      | 26              | 114.5                                        | 876436          | 195787                                                                                                             | 172668                                     | 109.78                                                   | 7.98                                    | 16.23                                               | 36.76                                                | 13.00          |
| 19                                                                               | 17                     | 28              | 124.6                                        | 876018          | 195460                                                                                                             | 172144                                     | 119.81                                                   | 8.00                                    | 16.25                                               | 36.60                                                | 12.88          |
| t <sub>correct</sub> (min)                                                       | Partial pressure (kPa) |                 | Rate (mmol L <sup>-1</sup> h <sup>-1</sup> ) |                 | d[H <sub>2</sub> O <sub>2</sub> ]/dt (mmol L <sup>-1</sup> h <sup>-1</sup> )                                       | Σ[H <sub>2</sub> ] (mmol L <sup>-1</sup> ) | [H <sub>2</sub> O <sub>2</sub> ] (mmol L <sup>-1</sup> ) | S <sub>e</sub> (—)                      | Σ <sub>2</sub> [H <sub>2</sub> O <sub>2</sub> ] (h) | Σ <sub>1</sub> /[H <sub>2</sub> O <sub>2</sub> ] (—) |                |
| 0.00                                                                             | P <sub>H2</sub>        | P <sub>O2</sub> | r <sub>H2</sub>                              | r <sub>O2</sub> |                                                                                                                    |                                            |                                                          |                                         |                                                     |                                                      |                |
| 0.00                                                                             | 17.72                  | 37.37           | 44.83                                        | 23.54           | 2.24                                                                                                               | 0.00                                       | 0.00                                                     |                                         | 0.000                                               | 0.000                                                |                |
| 9.28                                                                             | 17.79                  | 37.37           | 44.46                                        | 23.31           | 2.17                                                                                                               | 6.91                                       | 0.34                                                     | 0.05                                    | 0.077                                               | 20.266                                               |                |
| 19.35                                                                            | 17.87                  | 37.37           | 44.05                                        | 23.07           | 2.09                                                                                                               | 14.33                                      | 0.70                                                     | 0.05                                    | 0.163                                               | 20.523                                               |                |
| 29.38                                                                            | 17.93                  | 37.36           | 43.69                                        | 22.85           | 2.01                                                                                                               | 21.67                                      | 1.04                                                     | 0.05                                    | 0.249                                               | 20.802                                               |                |
| 39.41                                                                            | 18.04                  | 37.36           | 43.13                                        | 22.54           | 1.95                                                                                                               | 28.92                                      | 1.37                                                     | 0.05                                    | 0.336                                               | 21.068                                               |                |
| 49.48                                                                            | 18.08                  | 37.36           | 42.86                                        | 22.36           | 1.86                                                                                                               | 36.14                                      | 1.69                                                     | 0.05                                    | 0.424                                               | 21.350                                               |                |
| 59.51                                                                            | 18.12                  | 37.36           | 42.66                                        | 22.22           | 1.79                                                                                                               | 43.29                                      | 2.00                                                     | 0.05                                    | 0.514                                               | 21.670                                               |                |
| 69.58                                                                            | 18.22                  | 37.35           | 42.13                                        | 21.96           | 1.80                                                                                                               | 50.40                                      | 2.30                                                     | 0.05                                    | 0.603                                               | 21.927                                               |                |
| 79.61                                                                            | 18.25                  | 37.34           | 41.99                                        | 21.95           | 1.91                                                                                                               | 57.43                                      | 2.61                                                     | 0.05                                    | 0.689                                               | 22.015                                               |                |
| 89.68                                                                            | 18.28                  | 37.34           | 41.82                                        | 21.81           | 1.79                                                                                                               | 64.46                                      | 2.92                                                     | 0.05                                    | 0.775                                               | 22.082                                               |                |
| 99.71                                                                            | 18.31                  | 37.34           | 41.61                                        | 21.69           | 1.76                                                                                                               | 71.44                                      | 3.22                                                     | 0.05                                    | 0.862                                               | 22.212                                               |                |
| 109.78                                                                           | 18.35                  | 37.33           | 41.41                                        | 21.65           | 1.88                                                                                                               | 78.41                                      | 3.52                                                     | 0.04                                    | 0.948                                               | 22.263                                               |                |
| 119.81                                                                           | 18.38                  | 37.34           | 41.23                                        | 21.45           | 1.67                                                                                                               | 85.32                                      | 3.82                                                     | 0.04                                    | 1.035                                               | 22.343                                               |                |

## H<sub>2</sub>O<sub>2</sub> Synthesis Data Sheet

Entry No. 61 (Exp. T021) Employed in: Fig 9

| Catalyst, Additives                                                              |                        |                 | Reaction conditions                          |                 | Gas feed rate (sccm)                                                                                               |                                            |                                                          |                                                          |                                                     |                                                      |       |
|----------------------------------------------------------------------------------|------------------------|-----------------|----------------------------------------------|-----------------|--------------------------------------------------------------------------------------------------------------------|--------------------------------------------|----------------------------------------------------------|----------------------------------------------------------|-----------------------------------------------------|------------------------------------------------------|-------|
| Name                                                                             | Conc.                  | (Unit)          | T <sub>0</sub> (°C)                          | 26.2            |                                                                                                                    | H <sub>2</sub>                             | O <sub>2</sub>                                           | N <sub>2</sub>                                           | Sum                                                 |                                                      |       |
| Pt-PVP                                                                           | 1.04                   | (mg/L)          | T (°C)                                       | 30.2            | Set                                                                                                                | 15.00                                      | 20.00                                                    | 15.00                                                    | 50.00                                               |                                                      |       |
|                                                                                  |                        |                 | P <sub>0</sub> (hPa)                         | 1007.8          | Calibrated                                                                                                         | 15.02                                      | 18.67                                                    | 15.09                                                    | 48.78                                               |                                                      |       |
| H <sub>2</sub> SO <sub>4</sub>                                                   | 0.01                   | (N)             | P (hPa)                                      | 1014.4          | Determination of final [H <sub>2</sub> O <sub>2</sub> ]                                                            | Sample (g)                                 | Absorbance (—)                                           | [H <sub>2</sub> O <sub>2</sub> ] (mmol L <sup>-1</sup> ) |                                                     |                                                      |       |
|                                                                                  |                        |                 | Agitation (rpm)                              | 1199            |                                                                                                                    |                                            |                                                          |                                                          | 1.762                                               | 0.038                                                | 0.74  |
| Comment:<br>Catalyst activation: H <sub>2</sub> gas 20 sccm at 303 K for 40 min. |                        |                 |                                              |                 | Analysis of H <sub>2</sub> O <sub>2</sub> formation selectivity and H <sub>2</sub> O <sub>2</sub> destruction rate |                                            |                                                          | S <sub>f</sub> (—)                                       | 0.0580                                              |                                                      |       |
|                                                                                  |                        |                 |                                              |                 |                                                                                                                    |                                            |                                                          | k <sub>d</sub> [Cat] (h <sup>-1</sup> )                  | 0.2240                                              |                                                      |       |
|                                                                                  |                        |                 |                                              |                 |                                                                                                                    |                                            |                                                          | R <sup>2</sup>                                           | 0.9296                                              |                                                      |       |
| GC calibration                                                                   |                        | GC count        |                                              |                 | Ratio of sensitivity (toward N <sub>2</sub> )                                                                      |                                            | Feed gas measurement                                     |                                                          |                                                     |                                                      |       |
| Timing                                                                           | No.                    | H <sub>2</sub>  | O <sub>2</sub>                               | N <sub>2</sub>  | H <sub>2</sub>                                                                                                     | O <sub>2</sub>                             |                                                          |                                                          |                                                     |                                                      |       |
| Before reaction                                                                  | 1                      | 1468295         | 203221                                       | 133216          | 0.0903                                                                                                             | 0.0900                                     | 0.810                                                    | T <sub>a</sub> (°C)                                      | 25.2                                                |                                                      |       |
|                                                                                  | 2                      | 1467936         | 203495                                       | 133261          | 0.0903                                                                                                             |                                            |                                                          | 0.810                                                    | P <sub>0</sub> (hPa)                                | 1008.2                                               |       |
|                                                                                  | 3                      | 1468134         | 203189                                       | 133008          | 0.0901                                                                                                             |                                            |                                                          | 0.810                                                    | Flow (cc/min)                                       |                                                      |       |
| After reaction                                                                   | 4                      | 1460292         | 201106                                       | 131728          | 0.0897                                                                                                             |                                            |                                                          | 0.810                                                    | H <sub>2</sub>                                      | 17.02                                                |       |
|                                                                                  | 5                      | 1461586         | 201302                                       | 131755          | 0.0897                                                                                                             |                                            |                                                          | 0.809                                                    | O <sub>2</sub>                                      | 21.16                                                |       |
|                                                                                  | 6                      | 1461661         | 201213                                       | 131763          | 0.0897                                                                                                             |                                            |                                                          | 0.810                                                    | N <sub>2</sub>                                      | 17.11                                                |       |
| Time                                                                             |                        | GC count        |                                              |                 | t <sub>correct</sub> (min)                                                                                         | Outlet flow (sccm)                         |                                                          | Conversion(%)                                            |                                                     |                                                      |       |
| H                                                                                | M                      | S               | min.                                         | H <sub>2</sub>  |                                                                                                                    | O <sub>2</sub>                             | N <sub>2</sub>                                           | H <sub>2</sub>                                           | O <sub>2</sub>                                      |                                                      |       |
| 11                                                                               | 6                      | 22              | 4.0                                          | 724860          | 118416                                                                                                             | 255548                                     | 0.00                                                     | 8.72                                                     | 15.33                                               | 41.91                                                | 17.86 |
| 11                                                                               | 16                     | 24              | 14.0                                         | 1000280         | 191959                                                                                                             | 169332                                     | 8.98                                                     | 8.76                                                     | 15.36                                               | 41.63                                                | 17.70 |
| 11                                                                               | 26                     | 28              | 24.1                                         | 1026049         | 199381                                                                                                             | 160120                                     | 19.05                                                    | 8.81                                                     | 15.40                                               | 41.32                                                | 17.52 |
| 11                                                                               | 36                     | 30              | 34.1                                         | 1033535         | 200010                                                                                                             | 158467                                     | 29.08                                                    | 8.86                                                     | 15.43                                               | 41.02                                                | 17.34 |
| 11                                                                               | 46                     | 34              | 44.2                                         | 1035916         | 199878                                                                                                             | 157966                                     | 39.15                                                    | 8.90                                                     | 15.47                                               | 40.69                                                | 17.13 |
| 11                                                                               | 56                     | 36              | 54.2                                         | 1038701         | 199787                                                                                                             | 157593                                     | 49.18                                                    | 8.95                                                     | 15.50                                               | 40.39                                                | 16.98 |
| 12                                                                               | 6                      | 40              | 64.3                                         | 1039975         | 199619                                                                                                             | 157206                                     | 59.25                                                    | 8.98                                                     | 15.52                                               | 40.17                                                | 16.84 |
| 12                                                                               | 16                     | 42              | 74.3                                         | 1041924         | 199495                                                                                                             | 157094                                     | 69.28                                                    | 9.01                                                     | 15.53                                               | 40.02                                                | 16.83 |
| 12                                                                               | 26                     | 46              | 84.4                                         | 1043698         | 199484                                                                                                             | 156862                                     | 79.35                                                    | 9.03                                                     | 15.55                                               | 39.83                                                | 16.72 |
| 12                                                                               | 36                     | 48              | 94.4                                         | 1045963         | 199325                                                                                                             | 156560                                     | 89.38                                                    | 9.07                                                     | 15.56                                               | 39.58                                                | 16.62 |
| 12                                                                               | 46                     | 52              | 104.5                                        | 1047719         | 198940                                                                                                             | 156187                                     | 99.45                                                    | 9.11                                                     | 15.57                                               | 39.34                                                | 16.58 |
| 12                                                                               | 56                     | 54              | 114.5                                        | 1050171         | 198912                                                                                                             | 156051                                     | 109.48                                                   | 9.14                                                     | 15.58                                               | 39.14                                                | 16.52 |
| 13                                                                               | 6                      | 56              | 124.6                                        | 1051361         | 199151                                                                                                             | 156021                                     | 119.51                                                   | 9.15                                                     | 15.60                                               | 39.06                                                | 16.41 |
| t <sub>correct</sub> (min)                                                       | Partial pressure (kPa) |                 | Rate (mmol L <sup>-1</sup> h <sup>-1</sup> ) |                 | d[H <sub>2</sub> O <sub>2</sub> ]/dt (mmol L <sup>-1</sup> h <sup>-1</sup> )                                       | Σ[H <sub>2</sub> ] (mmol L <sup>-1</sup> ) | [H <sub>2</sub> O <sub>2</sub> ] (mmol L <sup>-1</sup> ) | S <sub>e</sub> (—)                                       | Σ <sub>2</sub> [H <sub>2</sub> O <sub>2</sub> ] (h) | Σ <sub>1</sub> /[H <sub>2</sub> O <sub>2</sub> ] (—) |       |
|                                                                                  | P <sub>H2</sub>        | P <sub>O2</sub> | r <sub>H2</sub>                              | r <sub>O2</sub> |                                                                                                                    |                                            |                                                          |                                                          |                                                     |                                                      |       |
| 0.00                                                                             | 21.65                  | 38.07           | 56.18                                        | 29.77           | 3.35                                                                                                               | 0.00                                       | 0.00                                                     |                                                          | 0.000                                               | 0.000                                                |       |
| 8.98                                                                             | 21.72                  | 38.07           | 55.82                                        | 29.50           | 3.18                                                                                                               | 8.38                                       | 0.49                                                     | 0.06                                                     | 0.075                                               | 17.166                                               |       |
| 19.05                                                                            | 21.79                  | 38.08           | 55.40                                        | 29.19           | 2.99                                                                                                               | 17.71                                      | 1.01                                                     | 0.06                                                     | 0.161                                               | 17.615                                               |       |
| 29.08                                                                            | 21.86                  | 38.08           | 54.99                                        | 28.91           | 2.82                                                                                                               | 26.94                                      | 1.49                                                     | 0.06                                                     | 0.249                                               | 18.069                                               |       |
| 39.15                                                                            | 21.93                  | 38.10           | 54.56                                        | 28.56           | 2.56                                                                                                               | 36.13                                      | 1.94                                                     | 0.05                                                     | 0.339                                               | 18.601                                               |       |
| 49.18                                                                            | 22.00                  | 38.10           | 54.16                                        | 28.30           | 2.44                                                                                                               | 45.22                                      | 2.36                                                     | 0.05                                                     | 0.431                                               | 19.159                                               |       |
| 59.25                                                                            | 22.05                  | 38.10           | 53.86                                        | 28.07           | 2.28                                                                                                               | 54.28                                      | 2.76                                                     | 0.05                                                     | 0.525                                               | 19.695                                               |       |
| 69.28                                                                            | 22.09                  | 38.08           | 53.65                                        | 28.06           | 2.47                                                                                                               | 63.27                                      | 3.15                                                     | 0.05                                                     | 0.616                                               | 20.065                                               |       |
| 79.35                                                                            | 22.13                  | 38.09           | 53.40                                        | 27.86           | 2.33                                                                                                               | 72.25                                      | 3.56                                                     | 0.05                                                     | 0.704                                               | 20.322                                               |       |
| 89.38                                                                            | 22.20                  | 38.08           | 53.07                                        | 27.70           | 2.34                                                                                                               | 81.15                                      | 3.95                                                     | 0.05                                                     | 0.794                                               | 20.567                                               |       |
| 99.45                                                                            | 22.26                  | 38.06           | 52.74                                        | 27.64           | 2.55                                                                                                               | 90.03                                      | 4.36                                                     | 0.05                                                     | 0.879                                               | 20.667                                               |       |
| 109.48                                                                           | 22.31                  | 38.04           | 52.47                                        | 27.54           | 2.61                                                                                                               | 98.82                                      | 4.79                                                     | 0.05                                                     | 0.959                                               | 20.644                                               |       |
| 119.51                                                                           | 22.32                  | 38.07           | 52.37                                        | 27.35           | 2.33                                                                                                               | 107.59                                     | 5.20                                                     | 0.05                                                     | 1.044                                               | 20.692                                               |       |

## H<sub>2</sub>O<sub>2</sub> Synthesis Data Sheet

Entry No. 62 (Exp. Y150) Employed in: Fig 10 Fig 11

| Catalyst, Additives                                                              |                        |                 | Reaction conditions                          |                 | Gas feed rate (sccm)                                                                                               |                                            |                                                          |                                                          |                                                     |                                                      |                |
|----------------------------------------------------------------------------------|------------------------|-----------------|----------------------------------------------|-----------------|--------------------------------------------------------------------------------------------------------------------|--------------------------------------------|----------------------------------------------------------|----------------------------------------------------------|-----------------------------------------------------|------------------------------------------------------|----------------|
| Name                                                                             | Conc.                  | (Unit)          | T <sub>0</sub> (°C)                          | 26.0            |                                                                                                                    | H <sub>2</sub>                             | O <sub>2</sub>                                           | N <sub>2</sub>                                           | Sum                                                 |                                                      |                |
| Pd-PVP                                                                           | 8.33                   | (mg/L)          | T (°C)                                       | 29.9            | Set                                                                                                                | 10.00                                      | 20.00                                                    | 20.00                                                    | 50.00                                               |                                                      |                |
| IrCl <sub>3</sub>                                                                | 0.04333                | (mg-Ir/L)       | P <sub>0</sub> (hPa)                         | 998.8           | Calibrated                                                                                                         | 10.08                                      | 19.15                                                    | 19.32                                                    | 48.55                                               |                                                      |                |
| H <sub>2</sub> SO <sub>4</sub>                                                   | 0.01                   | (N)             | P (hPa)                                      | 1005.5          | Determination of final [H <sub>2</sub> O <sub>2</sub> ]                                                            | Sample (g)                                 | Absorbance (—)                                           | [H <sub>2</sub> O <sub>2</sub> ] (mmol L <sup>-1</sup> ) |                                                     |                                                      |                |
| NaBr                                                                             | 0.001                  | (N)             | Agitation (rpm)                              | 1201            |                                                                                                                    |                                            |                                                          |                                                          |                                                     | 0.656                                                | 0.903          |
| Comment:<br>Catalyst activation: H <sub>2</sub> gas 20 sccm at 303 K for 40 min. |                        |                 |                                              |                 | Analysis of H <sub>2</sub> O <sub>2</sub> formation selectivity and H <sub>2</sub> O <sub>2</sub> destruction rate |                                            |                                                          | S <sub>f</sub> (—)                                       | 0.7766                                              |                                                      |                |
|                                                                                  |                        |                 |                                              |                 |                                                                                                                    |                                            |                                                          | k <sub>d</sub> [Cat] (h <sup>-1</sup> )                  | 0.3000                                              |                                                      |                |
|                                                                                  |                        |                 |                                              |                 |                                                                                                                    |                                            |                                                          | R <sup>2</sup>                                           | 0.9996                                              |                                                      |                |
| GC calibration                                                                   |                        | GC count        |                                              |                 | Ratio of sensitivity (toward N <sub>2</sub> )                                                                      |                                            | Feed gas measurement                                     |                                                          |                                                     |                                                      |                |
| Timing                                                                           | No.                    | H <sub>2</sub>  | O <sub>2</sub>                               | N <sub>2</sub>  | H <sub>2</sub>                                                                                                     | O <sub>2</sub>                             |                                                          |                                                          |                                                     |                                                      |                |
| Before reaction                                                                  | 1                      | 990777          | 197851                                       | 171634          | 0.0904                                                                                                             | 0.0904                                     | 0.860                                                    | T <sub>a</sub> (°C)                                      | 26.0                                                |                                                      |                |
|                                                                                  | 2                      | 991840          | 197990                                       | 171771          | 0.0904                                                                                                             |                                            |                                                          | 0.860                                                    | P <sub>0</sub> (hPa)                                | 994.8                                                |                |
|                                                                                  | 3                      | 991254          | 197949                                       | 171756          | 0.0904                                                                                                             |                                            |                                                          | 0.860                                                    | Flow (cc/min)                                       |                                                      |                |
| After reaction                                                                   | 4                      | 993455          | 198196                                       | 171950          | 0.0903                                                                                                             |                                            |                                                          | 0.860                                                    | H <sub>2</sub>                                      | 11.64                                                |                |
|                                                                                  | 5                      | 994499          | 198468                                       | 172204          | 0.0904                                                                                                             |                                            |                                                          | 0.860                                                    | O <sub>2</sub>                                      | 22.10                                                |                |
|                                                                                  | 6                      | 994943          | 198589                                       | 172160          | 0.0903                                                                                                             |                                            |                                                          | 0.859                                                    | N <sub>2</sub>                                      | 22.30                                                |                |
| Time                                                                             |                        |                 |                                              | GC count        |                                                                                                                    |                                            | t <sub>correct</sub> (min)                               | Outlet flow (sccm)                                       |                                                     | Conversion(%)                                        |                |
| H                                                                                | M                      | S               | min.                                         | H <sub>2</sub>  | O <sub>2</sub>                                                                                                     | N <sub>2</sub>                             |                                                          | H <sub>2</sub>                                           | O <sub>2</sub>                                      | H <sub>2</sub>                                       | O <sub>2</sub> |
| 14                                                                               | 53                     | 30              | 4.0                                          | 473035          | 113957                                                                                                             | 274264                                     | 0.00                                                     | 5.28                                                     | 14.88                                               | 47.63                                                | 22.27          |
| 15                                                                               | 3                      | 34              | 14.1                                         | 598908          | 177292                                                                                                             | 210292                                     | 10.33                                                    | 5.24                                                     | 14.93                                               | 48.04                                                | 22.00          |
| 15                                                                               | 13                     | 36              | 24.1                                         | 603480          | 183565                                                                                                             | 204780                                     | 20.37                                                    | 5.20                                                     | 14.99                                               | 48.43                                                | 21.73          |
| 15                                                                               | 23                     | 40              | 34.2                                         | 602858          | 184774                                                                                                             | 204176                                     | 30.43                                                    | 5.16                                                     | 15.03                                               | 48.87                                                | 21.49          |
| 15                                                                               | 33                     | 42              | 44.2                                         | 599053          | 185453                                                                                                             | 204004                                     | 40.47                                                    | 5.13                                                     | 15.10                                               | 49.15                                                | 21.14          |
| 15                                                                               | 43                     | 46              | 54.3                                         | 592960          | 185876                                                                                                             | 204008                                     | 50.53                                                    | 5.08                                                     | 15.13                                               | 49.67                                                | 20.96          |
| 15                                                                               | 53                     | 48              | 64.3                                         | 588889          | 186414                                                                                                             | 203943                                     | 60.57                                                    | 5.04                                                     | 15.18                                               | 50.00                                                | 20.71          |
| 16                                                                               | 3                      | 52              | 74.4                                         | 586528          | 186885                                                                                                             | 203673                                     | 70.63                                                    | 5.03                                                     | 15.24                                               | 50.13                                                | 20.40          |
| 16                                                                               | 13                     | 54              | 84.4                                         | 584926          | 187389                                                                                                             | 203629                                     | 80.67                                                    | 5.02                                                     | 15.28                                               | 50.26                                                | 20.17          |
| 16                                                                               | 23                     | 56              | 94.4                                         | 586310          | 188065                                                                                                             | 203493                                     | 90.70                                                    | 5.03                                                     | 15.35                                               | 50.11                                                | 19.83          |
| 16                                                                               | 34                     | 0               | 104.5                                        | 587826          | 188660                                                                                                             | 203301                                     | 100.77                                                   | 5.05                                                     | 15.41                                               | 49.93                                                | 19.50          |
| 16                                                                               | 44                     | 2               | 114.5                                        | 588287          | 188788                                                                                                             | 202678                                     | 110.80                                                   | 5.07                                                     | 15.47                                               | 49.74                                                | 19.20          |
| 16                                                                               | 54                     | 6               | 124.6                                        | 590506          | 189699                                                                                                             | 202788                                     | 120.87                                                   | 5.08                                                     | 15.54                                               | 49.58                                                | 18.85          |
| t <sub>correct</sub> (min)                                                       | Partial pressure (kPa) |                 | Rate (mmol L <sup>-1</sup> h <sup>-1</sup> ) |                 | d[H <sub>2</sub> O <sub>2</sub> ]/dt (mmol L <sup>-1</sup> h <sup>-1</sup> )                                       | Σ[H <sub>2</sub> ] (mmol L <sup>-1</sup> ) | [H <sub>2</sub> O <sub>2</sub> ] (mmol L <sup>-1</sup> ) | S <sub>e</sub> (—)                                       | Σ <sub>2</sub> [H <sub>2</sub> O <sub>2</sub> ] (h) | Σ <sub>1</sub> /[H <sub>2</sub> O <sub>2</sub> ] (—) |                |
|                                                                                  | P <sub>H2</sub>        | P <sub>O2</sub> | r <sub>H2</sub>                              | r <sub>O2</sub> |                                                                                                                    |                                            |                                                          |                                                          |                                                     |                                                      |                |
| 0.00                                                                             | 12.88                  | 36.30           | 42.88                                        | 38.07           | 33.27                                                                                                              | 0.00                                       | 0.00                                                     |                                                          | 0.000                                               | 0.000                                                |                |
| 10.33                                                                            | 12.78                  | 36.42           | 43.25                                        | 37.61           | 31.96                                                                                                              | 7.42                                       | 5.62                                                     | 0.76                                                     | 0.086                                               | 1.320                                                |                |
| 20.37                                                                            | 12.68                  | 36.53           | 43.61                                        | 37.15           | 30.70                                                                                                              | 14.68                                      | 10.86                                                    | 0.74                                                     | 0.171                                               | 1.352                                                |                |
| 30.43                                                                            | 12.57                  | 36.64           | 44.00                                        | 36.75           | 29.49                                                                                                              | 22.03                                      | 15.91                                                    | 0.72                                                     | 0.258                                               | 1.385                                                |                |
| 40.47                                                                            | 12.49                  | 36.77           | 44.26                                        | 36.14           | 28.02                                                                                                              | 29.41                                      | 20.71                                                    | 0.70                                                     | 0.346                                               | 1.420                                                |                |
| 50.53                                                                            | 12.37                  | 36.87           | 44.72                                        | 35.83           | 26.95                                                                                                              | 36.87                                      | 25.33                                                    | 0.69                                                     | 0.436                                               | 1.456                                                |                |
| 60.57                                                                            | 12.28                  | 36.97           | 45.02                                        | 35.40           | 25.78                                                                                                              | 44.38                                      | 29.73                                                    | 0.67                                                     | 0.526                                               | 1.493                                                |                |
| 70.63                                                                            | 12.23                  | 37.07           | 45.14                                        | 34.88           | 24.61                                                                                                              | 51.94                                      | 33.96                                                    | 0.65                                                     | 0.618                                               | 1.529                                                |                |
| 80.67                                                                            | 12.19                  | 37.15           | 45.25                                        | 34.48           | 23.71                                                                                                              | 59.50                                      | 38.00                                                    | 0.64                                                     | 0.710                                               | 1.566                                                |                |
| 90.70                                                                            | 12.20                  | 37.24           | 45.12                                        | 33.90           | 22.68                                                                                                              | 67.06                                      | 41.88                                                    | 0.62                                                     | 0.804                                               | 1.601                                                |                |
| 100.77                                                                           | 12.22                  | 37.31           | 44.96                                        | 33.33           | 21.71                                                                                                              | 74.61                                      | 45.60                                                    | 0.61                                                     | 0.899                                               | 1.636                                                |                |
| 110.80                                                                           | 12.25                  | 37.38           | 44.79                                        | 32.82           | 20.85                                                                                                              | 82.12                                      | 49.16                                                    | 0.60                                                     | 0.995                                               | 1.670                                                |                |
| 120.87                                                                           | 12.26                  | 37.46           | 44.64                                        | 32.23           | 19.81                                                                                                              | 89.62                                      | 52.57                                                    | 0.59                                                     | 1.093                                               | 1.705                                                |                |

## H<sub>2</sub>O<sub>2</sub> Synthesis Data Sheet

Entry No. 63 (Exp. Y154) Employed in: Fig 10 Fig 11

| Catalyst, Additives                                                              |                        |                 | Reaction conditions                          |                 | Gas feed rate (sccm)                                                                                               |                                            |                                                          |                                                          |                                                     |                                                      |                |
|----------------------------------------------------------------------------------|------------------------|-----------------|----------------------------------------------|-----------------|--------------------------------------------------------------------------------------------------------------------|--------------------------------------------|----------------------------------------------------------|----------------------------------------------------------|-----------------------------------------------------|------------------------------------------------------|----------------|
| Name                                                                             | Conc.                  | (Unit)          | T <sub>0</sub> (°C)                          | 24.1            |                                                                                                                    | H <sub>2</sub>                             | O <sub>2</sub>                                           | N <sub>2</sub>                                           | Sum                                                 |                                                      |                |
| Pd-PVP                                                                           | 8.33                   | (mg/L)          | T (°C)                                       | 29.9            | Set                                                                                                                | 10.00                                      | 20.00                                                    | 20.00                                                    | 50.00                                               |                                                      |                |
| IrCl <sub>3</sub>                                                                | 0.04333                | (mg-Ir/L)       | P <sub>0</sub> (hPa)                         | 1005.0          | Calibrated                                                                                                         | 9.94                                       | 18.53                                                    | 19.88                                                    | 48.36                                               |                                                      |                |
| H <sub>2</sub> SO <sub>4</sub>                                                   | 0.01                   | (N)             | P (hPa)                                      | 1011.7          | Determination of final [H <sub>2</sub> O <sub>2</sub> ]                                                            | Sample (g)                                 | Absorbance (—)                                           | [H <sub>2</sub> O <sub>2</sub> ] (mmol L <sup>-1</sup> ) |                                                     |                                                      |                |
| NaBr                                                                             | 0.001                  | (N)             | Agitation (rpm)                              | 1201            |                                                                                                                    |                                            |                                                          |                                                          | 0.589                                               | 0.747                                                | 42.75          |
| Comment:<br>Catalyst activation: H <sub>2</sub> gas 20 sccm at 303 K for 40 min. |                        |                 |                                              |                 | Analysis of H <sub>2</sub> O <sub>2</sub> formation selectivity and H <sub>2</sub> O <sub>2</sub> destruction rate |                                            |                                                          | S <sub>f</sub> (—)                                       | 0.6810                                              |                                                      |                |
|                                                                                  |                        |                 |                                              |                 |                                                                                                                    |                                            |                                                          | k <sub>d</sub> [Cat] (h <sup>-1</sup> )                  | 0.3506                                              |                                                      |                |
|                                                                                  |                        |                 |                                              |                 |                                                                                                                    |                                            |                                                          | R <sup>2</sup>                                           | 0.9993                                              |                                                      |                |
| GC calibration                                                                   |                        | GC count        |                                              |                 | Ratio of sensitivity (toward N <sub>2</sub> )                                                                      |                                            | Feed gas measurement                                     |                                                          |                                                     |                                                      |                |
| Timing                                                                           | No.                    | H <sub>2</sub>  | O <sub>2</sub>                               | N <sub>2</sub>  | H <sub>2</sub>                                                                                                     | O <sub>2</sub>                             |                                                          |                                                          |                                                     |                                                      |                |
| Before reaction                                                                  | 1                      | 991906          | 200339                                       | 173899          | 0.0877                                                                                                             | 0.0874                                     | 0.808                                                    | T <sub>a</sub> (°C)                                      | 25.4                                                |                                                      |                |
|                                                                                  | 2                      | 992303          | 200142                                       | 173626          | 0.0875                                                                                                             |                                            |                                                          | 0.809                                                    | P <sub>0</sub> (hPa)                                | 1004.0                                               |                |
|                                                                                  | 3                      | 992571          | 200227                                       | 173665          | 0.0875                                                                                                             |                                            |                                                          | 0.808                                                    | Flow (cc/min)                                       |                                                      |                |
| After reaction                                                                   | 4                      | 989736          | 199408                                       | 172868          | 0.0873                                                                                                             |                                            |                                                          | 0.808                                                    | H <sub>2</sub>                                      | 11.33                                                |                |
|                                                                                  | 5                      | 989510          | 199175                                       | 172718          | 0.0873                                                                                                             |                                            |                                                          | 0.808                                                    | O <sub>2</sub>                                      | 21.12                                                |                |
|                                                                                  | 6                      | 989829          | 199203                                       | 172776          | 0.0873                                                                                                             |                                            |                                                          | 0.808                                                    | N <sub>2</sub>                                      | 22.66                                                |                |
| Time                                                                             |                        |                 |                                              | GC count        |                                                                                                                    |                                            | t <sub>correct</sub> (min)                               | Outlet flow (sccm)                                       |                                                     | Conversion(%)                                        |                |
| H                                                                                | M                      | S               | min.                                         | H <sub>2</sub>  | O <sub>2</sub>                                                                                                     | N <sub>2</sub>                             |                                                          | H <sub>2</sub>                                           | O <sub>2</sub>                                      | H <sub>2</sub>                                       | O <sub>2</sub> |
| 10                                                                               | 30                     | 38              | 4.0                                          | 462065          | 114679                                                                                                             | 278348                                     | 0.00                                                     | 5.01                                                     | 14.38                                               | 49.64                                                | 22.39          |
| 10                                                                               | 40                     | 42              | 14.1                                         | 586045          | 180990                                                                                                             | 215197                                     | 10.36                                                    | 4.96                                                     | 14.44                                               | 50.08                                                | 22.08          |
| 10                                                                               | 50                     | 44              | 24.1                                         | 585454          | 186553                                                                                                             | 208099                                     | 20.39                                                    | 4.92                                                     | 14.50                                               | 50.52                                                | 21.77          |
| 11                                                                               | 0                      | 48              | 34.2                                         | 581518          | 187590                                                                                                             | 207211                                     | 30.46                                                    | 4.88                                                     | 14.55                                               | 50.93                                                | 21.48          |
| 11                                                                               | 10                     | 50              | 44.2                                         | 576135          | 188553                                                                                                             | 207444                                     | 40.49                                                    | 4.83                                                     | 14.61                                               | 51.44                                                | 21.16          |
| 11                                                                               | 20                     | 54              | 54.3                                         | 570993          | 188983                                                                                                             | 207152                                     | 50.56                                                    | 4.79                                                     | 14.66                                               | 51.81                                                | 20.87          |
| 11                                                                               | 30                     | 56              | 64.3                                         | 568135          | 189275                                                                                                             | 206696                                     | 60.59                                                    | 4.78                                                     | 14.72                                               | 51.94                                                | 20.57          |
| 11                                                                               | 41                     | 0               | 74.4                                         | 566386          | 189538                                                                                                             | 206184                                     | 70.66                                                    | 4.77                                                     | 14.78                                               | 51.97                                                | 20.26          |
| 11                                                                               | 51                     | 2               | 84.4                                         | 566990          | 190172                                                                                                             | 205971                                     | 80.69                                                    | 4.78                                                     | 14.84                                               | 51.87                                                | 19.92          |
| 12                                                                               | 1                      | 6               | 94.5                                         | 567238          | 190773                                                                                                             | 205800                                     | 90.76                                                    | 4.79                                                     | 14.90                                               | 51.81                                                | 19.60          |
| 12                                                                               | 11                     | 8               | 104.5                                        | 567528          | 190885                                                                                                             | 205139                                     | 100.79                                                   | 4.81                                                     | 14.96                                               | 51.63                                                | 19.29          |
| 12                                                                               | 21                     | 12              | 114.6                                        | 567602          | 191241                                                                                                             | 204709                                     | 110.86                                                   | 4.82                                                     | 15.02                                               | 51.52                                                | 18.97          |
| 12                                                                               | 31                     | 14              | 124.6                                        | 567766          | 191590                                                                                                             | 204330                                     | 120.89                                                   | 4.83                                                     | 15.07                                               | 51.42                                                | 18.67          |
| t <sub>correct</sub> (min)                                                       | Partial pressure (kPa) |                 | Rate (mmol L <sup>-1</sup> h <sup>-1</sup> ) |                 | d[H <sub>2</sub> O <sub>2</sub> ]/dt (mmol L <sup>-1</sup> h <sup>-1</sup> )                                       | Σ[H <sub>2</sub> ] (mmol L <sup>-1</sup> ) | [H <sub>2</sub> O <sub>2</sub> ] (mmol L <sup>-1</sup> ) | S <sub>e</sub> (—)                                       | Σ <sub>2</sub> [H <sub>2</sub> O <sub>2</sub> ] (h) | Σ <sub>1</sub> /[H <sub>2</sub> O <sub>2</sub> ] (—) |                |
|                                                                                  | P <sub>H2</sub>        | P <sub>O2</sub> | r <sub>H2</sub>                              | r <sub>O2</sub> |                                                                                                                    |                                            |                                                          |                                                          |                                                     |                                                      |                |
| 0.00                                                                             | 12.36                  | 35.49           | 44.06                                        | 37.04           | 30.03                                                                                                              | 0.00                                       | 0.00                                                     |                                                          | 0.000                                               | 0.000                                                |                |
| 10.36                                                                            | 12.24                  | 35.62           | 44.46                                        | 36.53           | 28.60                                                                                                              | 7.64                                       | 5.06                                                     | 0.66                                                     | 0.086                                               | 1.510                                                |                |
| 20.39                                                                            | 12.13                  | 35.75           | 44.85                                        | 36.03           | 27.21                                                                                                              | 15.11                                      | 9.73                                                     | 0.64                                                     | 0.172                                               | 1.553                                                |                |
| 30.46                                                                            | 12.03                  | 35.87           | 45.21                                        | 35.53           | 25.86                                                                                                              | 22.66                                      | 14.18                                                    | 0.63                                                     | 0.259                                               | 1.598                                                |                |
| 40.49                                                                            | 11.90                  | 36.01           | 45.66                                        | 35.01           | 24.36                                                                                                              | 30.26                                      | 18.38                                                    | 0.61                                                     | 0.348                                               | 1.647                                                |                |
| 50.56                                                                            | 11.80                  | 36.13           | 45.99                                        | 34.53           | 23.08                                                                                                              | 37.95                                      | 22.36                                                    | 0.59                                                     | 0.439                                               | 1.697                                                |                |
| 60.59                                                                            | 11.76                  | 36.23           | 46.11                                        | 34.04           | 21.97                                                                                                              | 45.65                                      | 26.12                                                    | 0.57                                                     | 0.531                                               | 1.747                                                |                |
| 70.66                                                                            | 11.73                  | 36.32           | 46.13                                        | 33.53           | 20.93                                                                                                              | 53.39                                      | 29.72                                                    | 0.56                                                     | 0.624                                               | 1.796                                                |                |
| 80.69                                                                            | 11.74                  | 36.41           | 46.04                                        | 32.95           | 19.86                                                                                                              | 61.09                                      | 33.13                                                    | 0.54                                                     | 0.719                                               | 1.844                                                |                |
| 90.76                                                                            | 11.73                  | 36.49           | 45.99                                        | 32.42           | 18.86                                                                                                              | 68.82                                      | 36.38                                                    | 0.53                                                     | 0.815                                               | 1.891                                                |                |
| 100.79                                                                           | 11.75                  | 36.56           | 45.83                                        | 31.92           | 18.00                                                                                                              | 76.49                                      | 39.46                                                    | 0.52                                                     | 0.912                                               | 1.938                                                |                |
| 110.86                                                                           | 11.76                  | 36.64           | 45.74                                        | 31.39           | 17.04                                                                                                              | 84.17                                      | 42.40                                                    | 0.50                                                     | 1.011                                               | 1.985                                                |                |
| 120.89                                                                           | 11.77                  | 36.72           | 45.64                                        | 30.89           | 16.14                                                                                                              | 91.81                                      | 45.18                                                    | 0.49                                                     | 1.111                                               | 2.032                                                |                |



## H<sub>2</sub>O<sub>2</sub> Synthesis Data Sheet

Entry No. 64 (Exp. Y160) Employed in: Fig 10 Fig 11

| Catalyst, Additives                                                              |                        |                 | Reaction conditions                          |                 | Gas feed rate (sccm)                                                                                               |                                            |                                                          |                                         |                                                     |                                                      |                |
|----------------------------------------------------------------------------------|------------------------|-----------------|----------------------------------------------|-----------------|--------------------------------------------------------------------------------------------------------------------|--------------------------------------------|----------------------------------------------------------|-----------------------------------------|-----------------------------------------------------|------------------------------------------------------|----------------|
| Name                                                                             | Conc.                  | (Unit)          | T <sub>0</sub> (°C)                          | 20.3            |                                                                                                                    | H <sub>2</sub>                             | O <sub>2</sub>                                           | N <sub>2</sub>                          | Sum                                                 |                                                      |                |
| Pd-PVP                                                                           | 8.33                   | (mg/L)          | T (°C)                                       | 29.9            | Set                                                                                                                | 16.00                                      | 20.00                                                    | 20.00                                   | 56.00                                               |                                                      |                |
| IrCl <sub>3</sub>                                                                | 0.08667                | (mg-Ir/L)       | P <sub>0</sub> (hPa)                         | 1001.8          | Calibrated                                                                                                         | 15.88                                      | 18.61                                                    | 20.03                                   | 54.52                                               |                                                      |                |
| H <sub>2</sub> SO <sub>4</sub>                                                   | 0.01                   | (N)             | P (hPa)                                      | 1008.5          | Determination of final [H <sub>2</sub> O <sub>2</sub> ]                                                            | Sample (g)                                 | Absorbance (—)                                           | [H <sub>2</sub> O <sub>2</sub> ]        |                                                     |                                                      |                |
| NaBr                                                                             | 0.001                  | (N)             | Agitation (rpm)                              | 1196            |                                                                                                                    |                                            |                                                          | 0.283                                   | 0.511                                               | (mmol L <sup>-1</sup> )                              | 60.90          |
| Comment:<br>Catalyst activation: H <sub>2</sub> gas 20 sccm at 303 K for 40 min. |                        |                 |                                              |                 | Analysis of H <sub>2</sub> O <sub>2</sub> formation selectivity and H <sub>2</sub> O <sub>2</sub> destruction rate |                                            |                                                          | S <sub>f</sub> (—)                      | 0.6297                                              |                                                      |                |
|                                                                                  |                        |                 |                                              |                 |                                                                                                                    |                                            |                                                          | k <sub>d</sub> [Cat] (h <sup>-1</sup> ) | 0.4946                                              |                                                      |                |
|                                                                                  |                        |                 |                                              |                 |                                                                                                                    |                                            |                                                          | R <sup>2</sup>                          | 0.9980                                              |                                                      |                |
| GC calibration                                                                   |                        | GC count        |                                              |                 | Ratio of sensitivity (toward N <sub>2</sub> )                                                                      |                                            | Feed gas measurement                                     |                                         |                                                     |                                                      |                |
| Timing                                                                           | No.                    | H <sub>2</sub>  | O <sub>2</sub>                               | N <sub>2</sub>  | H <sub>2</sub>                                                                                                     | O <sub>2</sub>                             |                                                          |                                         |                                                     |                                                      |                |
| Before reaction                                                                  | 1                      | 1379673         | 179724                                       | 155799          | 0.0896                                                                                                             | 0.0894                                     | 0.805                                                    | T <sub>a</sub> (°C)                     | 19.3                                                |                                                      |                |
|                                                                                  | 2                      | 1380057         | 179596                                       | 155763          | 0.0895                                                                                                             |                                            |                                                          | 0.806                                   | P <sub>0</sub> (hPa)                                | 1003.4                                               |                |
|                                                                                  | 3                      | 1379693         | 179483                                       | 155536          | 0.0894                                                                                                             |                                            |                                                          | 0.806                                   | Flow (cc/min)                                       |                                                      |                |
| After reaction                                                                   | 4                      | 1376022         | 178867                                       | 154933          | 0.0893                                                                                                             |                                            |                                                          | 0.805                                   | H <sub>2</sub>                                      | 17.56                                                |                |
|                                                                                  | 5                      | 1376022         | 178867                                       | 154933          | 0.0893                                                                                                             |                                            |                                                          | 0.805                                   | O <sub>2</sub>                                      | 20.58                                                |                |
|                                                                                  | 6                      | 1376022         | 178867                                       | 154933          | 0.0893                                                                                                             |                                            |                                                          | 0.805                                   | N <sub>2</sub>                                      | 22.14                                                |                |
| Time                                                                             |                        |                 |                                              | GC count        |                                                                                                                    |                                            | t <sub>correct</sub> (min)                               | Outlet flow (sccm)                      |                                                     | Conversion(%)                                        |                |
| H                                                                                | M                      | S               | min.                                         | H <sub>2</sub>  | O <sub>2</sub>                                                                                                     | N <sub>2</sub>                             |                                                          | H <sub>2</sub>                          | O <sub>2</sub>                                      | H <sub>2</sub>                                       | O <sub>2</sub> |
| 11                                                                               | 29                     | 10              | 4.0                                          | 722361          | 103577                                                                                                             | 268939                                     | 0.00                                                     | 7.36                                    | 11.66                                               | 53.68                                                | 37.38          |
| 11                                                                               | 39                     | 14              | 14.1                                         | 871725          | 149804                                                                                                             | 217309                                     | 10.87                                                    | 7.25                                    | 11.79                                               | 54.37                                                | 36.66          |
| 11                                                                               | 49                     | 16              | 24.1                                         | 857306          | 156088                                                                                                             | 213160                                     | 20.90                                                    | 7.15                                    | 11.91                                               | 55.01                                                | 35.99          |
| 11                                                                               | 59                     | 20              | 34.2                                         | 840004          | 159010                                                                                                             | 213062                                     | 30.97                                                    | 7.06                                    | 12.04                                               | 55.56                                                | 35.33          |
| 12                                                                               | 9                      | 22              | 44.2                                         | 821602          | 160454                                                                                                             | 212703                                     | 41.00                                                    | 6.92                                    | 12.17                                               | 56.46                                                | 34.63          |
| 12                                                                               | 19                     | 26              | 54.3                                         | 812330          | 161637                                                                                                             | 212169                                     | 51.07                                                    | 6.85                                    | 12.29                                               | 56.84                                                | 33.98          |
| 12                                                                               | 29                     | 28              | 64.3                                         | 809407          | 162519                                                                                                             | 211514                                     | 61.10                                                    | 6.85                                    | 12.39                                               | 56.87                                                | 33.42          |
| 12                                                                               | 39                     | 32              | 74.4                                         | 808730          | 163427                                                                                                             | 210867                                     | 71.17                                                    | 6.87                                    | 12.50                                               | 56.77                                                | 32.84          |
| 12                                                                               | 49                     | 34              | 84.4                                         | 809691          | 164240                                                                                                             | 210026                                     | 81.20                                                    | 6.90                                    | 12.61                                               | 56.54                                                | 32.24          |
| 12                                                                               | 59                     | 38              | 94.5                                         | 811000          | 165487                                                                                                             | 209783                                     | 91.27                                                    | 6.92                                    | 12.72                                               | 56.42                                                | 31.64          |
| 13                                                                               | 9                      | 40              | 104.5                                        | 810182          | 165589                                                                                                             | 208161                                     | 101.30                                                   | 6.97                                    | 12.83                                               | 56.13                                                | 31.07          |
| 13                                                                               | 19                     | 42              | 114.5                                        | 811090          | 166421                                                                                                             | 207389                                     | 111.33                                                   | 7.00                                    | 12.94                                               | 55.92                                                | 30.46          |
| 13                                                                               | 29                     | 46              | 124.6                                        | 810855          | 166902                                                                                                             | 206619                                     | 121.40                                                   | 7.03                                    | 13.03                                               | 55.76                                                | 30.00          |
| t <sub>correct</sub> (min)                                                       | Partial pressure (kPa) |                 | Rate (mmol L <sup>-1</sup> h <sup>-1</sup> ) |                 | d[H <sub>2</sub> O <sub>2</sub> ]/dt (mmol L <sup>-1</sup> h <sup>-1</sup> )                                       | Σ[H <sub>2</sub> ] (mmol L <sup>-1</sup> ) | [H <sub>2</sub> O <sub>2</sub> ] (mmol L <sup>-1</sup> ) | S <sub>e</sub> (—)                      | Σ <sub>2</sub> [H <sub>2</sub> O <sub>2</sub> ] (h) | Σ <sub>1</sub> /[H <sub>2</sub> O <sub>2</sub> ] (—) |                |
| 0.00                                                                             | P <sub>H2</sub>        | P <sub>O2</sub> | r <sub>H2</sub>                              | r <sub>O2</sub> |                                                                                                                    |                                            |                                                          |                                         |                                                     |                                                      |                |
| 0.00                                                                             | 18.20                  | 28.84           | 76.12                                        | 62.13           | 48.15                                                                                                              | 0.00                                       | 0.00                                                     |                                         | 0.000                                               | 0.000                                                |                |
| 10.87                                                                            | 17.92                  | 29.15           | 77.10                                        | 60.93           | 44.76                                                                                                              | 13.87                                      | 8.41                                                     | 0.61                                    | 0.091                                               | 1.649                                                |                |
| 20.90                                                                            | 17.66                  | 29.44           | 78.01                                        | 59.82           | 41.63                                                                                                              | 26.84                                      | 15.64                                                    | 0.58                                    | 0.177                                               | 1.717                                                |                |
| 30.97                                                                            | 17.43                  | 29.72           | 78.79                                        | 58.72           | 38.64                                                                                                              | 40.00                                      | 22.37                                                    | 0.56                                    | 0.266                                               | 1.788                                                |                |
| 41.00                                                                            | 17.08                  | 30.05           | 80.07                                        | 57.56           | 35.05                                                                                                              | 53.28                                      | 28.53                                                    | 0.54                                    | 0.358                                               | 1.867                                                |                |
| 51.07                                                                            | 16.90                  | 30.31           | 80.61                                        | 56.48           | 32.35                                                                                                              | 66.76                                      | 34.19                                                    | 0.51                                    | 0.453                                               | 1.953                                                |                |
| 61.10                                                                            | 16.85                  | 30.49           | 80.64                                        | 55.54           | 30.44                                                                                                              | 80.24                                      | 39.44                                                    | 0.49                                    | 0.549                                               | 2.035                                                |                |
| 71.17                                                                            | 16.84                  | 30.66           | 80.51                                        | 54.58           | 28.65                                                                                                              | 93.76                                      | 44.39                                                    | 0.47                                    | 0.646                                               | 2.112                                                |                |
| 81.20                                                                            | 16.86                  | 30.82           | 80.19                                        | 53.58           | 26.96                                                                                                              | 107.20                                     | 49.04                                                    | 0.46                                    | 0.744                                               | 2.186                                                |                |
| 91.27                                                                            | 16.85                  | 30.99           | 80.02                                        | 52.59           | 25.16                                                                                                              | 120.64                                     | 53.42                                                    | 0.44                                    | 0.844                                               | 2.258                                                |                |
| 101.30                                                                           | 16.90                  | 31.13           | 79.60                                        | 51.63           | 23.67                                                                                                              | 133.98                                     | 57.50                                                    | 0.43                                    | 0.945                                               | 2.330                                                |                |
| 111.33                                                                           | 16.92                  | 31.29           | 79.30                                        | 50.63           | 21.96                                                                                                              | 147.27                                     | 61.31                                                    | 0.42                                    | 1.048                                               | 2.402                                                |                |
| 121.40                                                                           | 16.94                  | 31.41           | 79.08                                        | 49.86           | 20.65                                                                                                              | 160.55                                     | 64.89                                                    | 0.40                                    | 1.154                                               | 2.474                                                |                |

## H<sub>2</sub>O<sub>2</sub> Synthesis Data Sheet

Entry No. 65 (Exp. Y159) Employed in: Fig 10 Fig 11

| Catalyst, Additives                                                              |                        |                 | Reaction conditions                          |                 | Gas feed rate (sccm)                                                                                               |                                            |                                                          |                                                          |                                                     |                                                      |                |
|----------------------------------------------------------------------------------|------------------------|-----------------|----------------------------------------------|-----------------|--------------------------------------------------------------------------------------------------------------------|--------------------------------------------|----------------------------------------------------------|----------------------------------------------------------|-----------------------------------------------------|------------------------------------------------------|----------------|
| Name                                                                             | Conc.                  | (Unit)          | T <sub>0</sub> (°C)                          | 26.5            |                                                                                                                    | H <sub>2</sub>                             | O <sub>2</sub>                                           | N <sub>2</sub>                                           | Sum                                                 |                                                      |                |
| Pd-PVP                                                                           | 8.33                   | (mg/L)          | T (°C)                                       | 30.1            | Set                                                                                                                | 17.00                                      | 20.00                                                    | 20.00                                                    | 57.00                                               |                                                      |                |
| IrCl <sub>3</sub>                                                                | 0.1734                 | (mg-Ir/L)       | P <sub>0</sub> (hPa)                         | 1005.0          | Calibrated                                                                                                         | 16.82                                      | 18.68                                                    | 19.81                                                    | 55.31                                               |                                                      |                |
| H <sub>2</sub> SO <sub>4</sub>                                                   | 0.01                   | (N)             | P (hPa)                                      | 1011.6          | Determination of final [H <sub>2</sub> O <sub>2</sub> ]                                                            | Sample (g)                                 | Absorbance (—)                                           | [H <sub>2</sub> O <sub>2</sub> ] (mmol L <sup>-1</sup> ) |                                                     |                                                      |                |
| NaBr                                                                             | 0.001                  | (N)             | Agitation (rpm)                              | 1198            |                                                                                                                    |                                            |                                                          |                                                          | 0.261                                               | 0.474                                                | 61.21          |
| Comment:<br>Catalyst activation: H <sub>2</sub> gas 20 sccm at 303 K for 40 min. |                        |                 |                                              |                 | Analysis of H <sub>2</sub> O <sub>2</sub> formation selectivity and H <sub>2</sub> O <sub>2</sub> destruction rate |                                            |                                                          | S <sub>f</sub> (—)                                       | 0.4646                                              |                                                      |                |
|                                                                                  |                        |                 |                                              |                 |                                                                                                                    |                                            |                                                          | k <sub>d</sub> [Cat] (h <sup>-1</sup> )                  | 0.2530                                              |                                                      |                |
|                                                                                  |                        |                 |                                              |                 |                                                                                                                    |                                            |                                                          | R <sup>2</sup>                                           | 0.9999                                              |                                                      |                |
| GC calibration                                                                   |                        | GC count        |                                              |                 | Ratio of sensitivity (toward N <sub>2</sub> )                                                                      |                                            | Feed gas measurement                                     |                                                          |                                                     |                                                      |                |
| Timing                                                                           | No.                    | H <sub>2</sub>  | O <sub>2</sub>                               | N <sub>2</sub>  | H <sub>2</sub>                                                                                                     | O <sub>2</sub>                             |                                                          |                                                          |                                                     |                                                      |                |
| Before reaction                                                                  | 1                      | 1427811         | 175522                                       | 151841          | 0.0903                                                                                                             | 0.0904                                     | 0.817                                                    | T <sub>a</sub> (°C)                                      | 25.8                                                |                                                      |                |
|                                                                                  | 2                      | 1428311         | 175772                                       | 152293          | 0.0906                                                                                                             |                                            |                                                          | 0.817                                                    | P <sub>0</sub> (hPa)                                | 1006.6                                               |                |
|                                                                                  | 3                      | 1431953         | 175812                                       | 152208          | 0.0903                                                                                                             |                                            |                                                          | 0.817                                                    | Flow (cc/min)                                       |                                                      |                |
| After reaction                                                                   | 4                      | 1427811         | 175522                                       | 151841          | 0.0903                                                                                                             |                                            |                                                          | 0.816                                                    | H <sub>2</sub>                                      | 19.16                                                |                |
|                                                                                  | 5                      | 1428311         | 175772                                       | 152293          | 0.0906                                                                                                             |                                            |                                                          | 0.817                                                    | O <sub>2</sub>                                      | 21.28                                                |                |
|                                                                                  | 6                      | 1431953         | 175812                                       | 152208          | 0.0903                                                                                                             |                                            |                                                          | 0.817                                                    | N <sub>2</sub>                                      | 22.56                                                |                |
| Time                                                                             |                        |                 |                                              | GC count        |                                                                                                                    |                                            | t <sub>correct</sub> (min)                               | Outlet flow (sccm)                                       |                                                     | Conversion(%)                                        |                |
| H                                                                                | M                      | S               | min.                                         | H <sub>2</sub>  | O <sub>2</sub>                                                                                                     | N <sub>2</sub>                             |                                                          | H <sub>2</sub>                                           | O <sub>2</sub>                                      | H <sub>2</sub>                                       | O <sub>2</sub> |
| 15                                                                               | 48                     | 34              | 4.0                                          | 678029          | 99264                                                                                                              | 270319                                     | 0.00                                                     | 6.71                                                     | 11.28                                               | 60.14                                                | 39.61          |
| 15                                                                               | 58                     | 36              | 14.0                                         | 796869          | 147069                                                                                                             | 220632                                     | 10.80                                                    | 6.72                                                     | 11.39                                               | 60.05                                                | 39.04          |
| 16                                                                               | 8                      | 40              | 24.1                                         | 801374          | 151920                                                                                                             | 214873                                     | 20.87                                                    | 6.74                                                     | 11.49                                               | 59.96                                                | 38.50          |
| 16                                                                               | 18                     | 42              | 34.1                                         | 806641          | 153307                                                                                                             | 214068                                     | 30.90                                                    | 6.75                                                     | 11.58                                               | 59.90                                                | 38.00          |
| 16                                                                               | 28                     | 46              | 44.2                                         | 805905          | 154119                                                                                                             | 212964                                     | 40.97                                                    | 6.77                                                     | 11.71                                               | 59.73                                                | 37.35          |
| 16                                                                               | 38                     | 48              | 54.2                                         | 802986          | 154615                                                                                                             | 212166                                     | 51.00                                                    | 6.78                                                     | 11.79                                               | 59.72                                                | 36.91          |
| 16                                                                               | 48                     | 52              | 64.3                                         | 803776          | 155492                                                                                                             | 211813                                     | 61.07                                                    | 6.79                                                     | 11.87                                               | 59.62                                                | 36.45          |
| 16                                                                               | 58                     | 54              | 74.3                                         | 803777          | 156253                                                                                                             | 211484                                     | 71.10                                                    | 6.80                                                     | 11.95                                               | 59.55                                                | 36.03          |
| 17                                                                               | 8                      | 58              | 84.4                                         | 803183          | 156655                                                                                                             | 210812                                     | 81.17                                                    | 6.82                                                     | 12.02                                               | 59.45                                                | 35.67          |
| 17                                                                               | 19                     | 0               | 94.4                                         | 804483          | 157688                                                                                                             | 210252                                     | 91.20                                                    | 6.85                                                     | 12.13                                               | 59.28                                                | 35.07          |
| 17                                                                               | 29                     | 4               | 104.5                                        | 806078          | 158497                                                                                                             | 209930                                     | 101.27                                                   | 6.87                                                     | 12.21                                               | 59.14                                                | 34.64          |
| 17                                                                               | 39                     | 6               | 114.5                                        | 805986          | 158977                                                                                                             | 209191                                     | 111.30                                                   | 6.90                                                     | 12.29                                               | 59.00                                                | 34.21          |
| 17                                                                               | 49                     | 10              | 124.6                                        | 806795          | 159536                                                                                                             | 208547                                     | 121.37                                                   | 6.93                                                     | 12.37                                               | 58.83                                                | 33.77          |
| t <sub>correct</sub> (min)                                                       | Partial pressure (kPa) |                 | Rate (mmol L <sup>-1</sup> h <sup>-1</sup> ) |                 | d[H <sub>2</sub> O <sub>2</sub> ]/dt (mmol L <sup>-1</sup> h <sup>-1</sup> )                                       | Σ[H <sub>2</sub> ] (mmol L <sup>-1</sup> ) | [H <sub>2</sub> O <sub>2</sub> ] (mmol L <sup>-1</sup> ) | S <sub>e</sub> (—)                                       | Σ <sub>2</sub> [H <sub>2</sub> O <sub>2</sub> ] (h) | Σ <sub>1</sub> /[H <sub>2</sub> O <sub>2</sub> ] (—) |                |
|                                                                                  | P <sub>H2</sub>        | P <sub>O2</sub> | r <sub>H2</sub>                              | r <sub>O2</sub> |                                                                                                                    |                                            |                                                          |                                                          |                                                     |                                                      |                |
| 0.00                                                                             | 17.19                  | 28.92           | 90.32                                        | 66.08           | 41.84                                                                                                              | 0.00                                       | 0.00                                                     |                                                          | 0.000                                               | 0.000                                                |                |
| 10.80                                                                            | 17.17                  | 29.10           | 90.18                                        | 65.12           | 40.06                                                                                                              | 16.25                                      | 7.37                                                     | 0.45                                                     | 0.090                                               | 2.204                                                |                |
| 20.87                                                                            | 17.16                  | 29.27           | 90.05                                        | 64.23           | 38.40                                                                                                              | 31.37                                      | 13.96                                                    | 0.44                                                     | 0.176                                               | 2.248                                                |                |
| 30.90                                                                            | 17.14                  | 29.43           | 89.96                                        | 63.39           | 36.81                                                                                                              | 46.42                                      | 20.24                                                    | 0.44                                                     | 0.262                                               | 2.293                                                |                |
| 40.97                                                                            | 17.15                  | 29.62           | 89.71                                        | 62.30           | 34.89                                                                                                              | 61.50                                      | 26.26                                                    | 0.43                                                     | 0.351                                               | 2.342                                                |                |
| 51.00                                                                            | 17.11                  | 29.77           | 89.70                                        | 61.57           | 33.44                                                                                                              | 76.50                                      | 31.97                                                    | 0.42                                                     | 0.440                                               | 2.393                                                |                |
| 61.07                                                                            | 17.11                  | 29.91           | 89.54                                        | 60.79           | 32.05                                                                                                              | 91.53                                      | 37.46                                                    | 0.41                                                     | 0.531                                               | 2.443                                                |                |
| 71.10                                                                            | 17.10                  | 30.03           | 89.44                                        | 60.11           | 30.78                                                                                                              | 106.50                                     | 42.72                                                    | 0.40                                                     | 0.623                                               | 2.493                                                |                |
| 81.17                                                                            | 17.10                  | 30.14           | 89.30                                        | 59.49           | 29.69                                                                                                              | 121.49                                     | 47.79                                                    | 0.39                                                     | 0.716                                               | 2.542                                                |                |
| 91.20                                                                            | 17.11                  | 30.31           | 89.03                                        | 58.50           | 27.96                                                                                                              | 136.40                                     | 52.61                                                    | 0.39                                                     | 0.810                                               | 2.593                                                |                |
| 101.27                                                                           | 17.13                  | 30.43           | 88.82                                        | 57.78           | 26.73                                                                                                              | 151.32                                     | 57.20                                                    | 0.38                                                     | 0.906                                               | 2.645                                                |                |
| 111.30                                                                           | 17.14                  | 30.55           | 88.61                                        | 57.06           | 25.51                                                                                                              | 166.16                                     | 61.57                                                    | 0.37                                                     | 1.003                                               | 2.699                                                |                |
| 121.37                                                                           | 17.16                  | 30.66           | 88.36                                        | 56.33           | 24.31                                                                                                              | 181.00                                     | 65.75                                                    | 0.36                                                     | 1.102                                               | 2.753                                                |                |

## H<sub>2</sub>O<sub>2</sub> Synthesis Data Sheet

Entry No. 66 (Exp. Y163) Employed in: Fig 10 Fig 11

| Catalyst, Additives                                                              |                        |                 | Reaction conditions                          |                 | Gas feed rate (sccm)                                                                                               |                                            |                                                          |                                                          |                                                     |                                                      |                |
|----------------------------------------------------------------------------------|------------------------|-----------------|----------------------------------------------|-----------------|--------------------------------------------------------------------------------------------------------------------|--------------------------------------------|----------------------------------------------------------|----------------------------------------------------------|-----------------------------------------------------|------------------------------------------------------|----------------|
| Name                                                                             | Conc.                  | (Unit)          | T <sub>0</sub> (°C)                          | 18.4            |                                                                                                                    | H <sub>2</sub>                             | O <sub>2</sub>                                           | N <sub>2</sub>                                           | Sum                                                 |                                                      |                |
| Pd-PVP                                                                           | 8.33                   | (mg/L)          | T (°C)                                       | 29.8            | Set                                                                                                                | 17.00                                      | 20.00                                                    | 20.00                                                    | 57.00                                               |                                                      |                |
| IrCl <sub>3</sub>                                                                | 0.1734                 | (mg-Ir/L)       | P <sub>0</sub> (hPa)                         | 1016.2          | Calibrated                                                                                                         | 16.90                                      | 18.70                                                    | 19.99                                                    | 55.59                                               |                                                      |                |
| H <sub>2</sub> SO <sub>4</sub>                                                   | 0.01                   | (N)             | P (hPa)                                      | 1022.8          | Determination of final [H <sub>2</sub> O <sub>2</sub> ]                                                            | Sample (g)                                 | Absorbance (—)                                           | [H <sub>2</sub> O <sub>2</sub> ] (mmol L <sup>-1</sup> ) |                                                     |                                                      |                |
| NaBr                                                                             | 0.001                  | (N)             | Agitation (rpm)                              | 1203            |                                                                                                                    |                                            |                                                          |                                                          | 0.415                                               | 0.738                                                | 59.94          |
| Comment:<br>Catalyst activation: H <sub>2</sub> gas 20 sccm at 303 K for 40 min. |                        |                 |                                              |                 | Analysis of H <sub>2</sub> O <sub>2</sub> formation selectivity and H <sub>2</sub> O <sub>2</sub> destruction rate |                                            |                                                          | S <sub>f</sub> (—)                                       | 0.4559                                              |                                                      |                |
|                                                                                  |                        |                 |                                              |                 |                                                                                                                    |                                            |                                                          | k <sub>d</sub> [Cat] (h <sup>-1</sup> )                  | 0.2751                                              |                                                      |                |
|                                                                                  |                        |                 |                                              |                 |                                                                                                                    |                                            |                                                          | R <sup>2</sup>                                           | 0.9994                                              |                                                      |                |
| GC calibration                                                                   |                        | GC count        |                                              |                 | Ratio of sensitivity (toward N <sub>2</sub> )                                                                      |                                            | Feed gas measurement                                     |                                                          |                                                     |                                                      |                |
| Timing                                                                           | No.                    | H <sub>2</sub>  | O <sub>2</sub>                               | N <sub>2</sub>  | H <sub>2</sub>                                                                                                     | O <sub>2</sub>                             |                                                          |                                                          |                                                     |                                                      |                |
| Before reaction                                                                  | 1                      | 1457216         | 178464                                       | 155191          | 0.0900                                                                                                             | 0.0899                                     | 0.813                                                    | T <sub>a</sub> (°C)                                      | 17.6                                                |                                                      |                |
|                                                                                  | 2                      | 1455670         | 178382                                       | 155088          | 0.0900                                                                                                             |                                            |                                                          | 0.813                                                    | P <sub>0</sub> (hPa)                                | 1016.8                                               |                |
|                                                                                  | 3                      | 1454517         | 178056                                       | 154893          | 0.0900                                                                                                             |                                            |                                                          | 0.814                                                    | Flow (cc/min)                                       |                                                      |                |
| After reaction                                                                   | 4                      | 1450113         | 177199                                       | 153891          | 0.0897                                                                                                             |                                            |                                                          | 0.812                                                    | H <sub>2</sub>                                      | 18.28                                                |                |
|                                                                                  | 5                      | 1449048         | 177301                                       | 154017          | 0.0898                                                                                                             |                                            |                                                          | 0.812                                                    | O <sub>2</sub>                                      | 20.23                                                |                |
|                                                                                  | 6                      | 1449486         | 177339                                       | 154030          | 0.0898                                                                                                             |                                            |                                                          | 0.812                                                    | N <sub>2</sub>                                      | 21.63                                                |                |
| Time                                                                             |                        |                 |                                              | GC count        |                                                                                                                    |                                            | t <sub>correct</sub> (min)                               | Outlet flow (sccm)                                       |                                                     | Conversion(%)                                        |                |
| H                                                                                | M                      | S               | min.                                         | H <sub>2</sub>  | O <sub>2</sub>                                                                                                     | N <sub>2</sub>                             |                                                          | H <sub>2</sub>                                           | O <sub>2</sub>                                      | H <sub>2</sub>                                       | O <sub>2</sub> |
| 12                                                                               | 0                      | 34              | 4.0                                          | 728296          | 101308                                                                                                             | 276259                                     | 0.00                                                     | 6.49                                                     | 11.14                                               | 61.61                                                | 40.43          |
| 12                                                                               | 10                     | 36              | 14.0                                         | 838346          | 148852                                                                                                             | 226930                                     | 11.42                                                    | 6.51                                                     | 11.26                                               | 61.46                                                | 39.77          |
| 12                                                                               | 20                     | 40              | 24.1                                         | 817748          | 155466                                                                                                             | 223371                                     | 21.49                                                    | 6.53                                                     | 11.37                                               | 61.33                                                | 39.20          |
| 12                                                                               | 30                     | 42              | 34.1                                         | 811726          | 157069                                                                                                             | 222371                                     | 31.52                                                    | 6.56                                                     | 11.48                                               | 61.17                                                | 38.61          |
| 12                                                                               | 40                     | 46              | 44.2                                         | 809834          | 157945                                                                                                             | 221534                                     | 41.59                                                    | 6.57                                                     | 11.59                                               | 61.12                                                | 38.04          |
| 12                                                                               | 50                     | 48              | 54.2                                         | 810718          | 158791                                                                                                             | 220585                                     | 51.62                                                    | 6.61                                                     | 11.70                                               | 60.91                                                | 37.44          |
| 13                                                                               | 0                      | 52              | 64.3                                         | 810853          | 159548                                                                                                             | 219619                                     | 61.69                                                    | 6.64                                                     | 11.81                                               | 60.73                                                | 36.86          |
| 13                                                                               | 10                     | 54              | 74.3                                         | 812139          | 160267                                                                                                             | 218567                                     | 71.72                                                    | 6.68                                                     | 11.92                                               | 60.48                                                | 36.27          |
| 13                                                                               | 20                     | 58              | 84.4                                         | 813887          | 161239                                                                                                             | 217706                                     | 81.79                                                    | 6.72                                                     | 12.04                                               | 60.23                                                | 35.63          |
| 13                                                                               | 31                     | 0               | 94.4                                         | 817037          | 162043                                                                                                             | 216648                                     | 91.82                                                    | 6.78                                                     | 12.16                                               | 59.89                                                | 34.99          |
| 13                                                                               | 41                     | 2               | 104.5                                        | 818773          | 162786                                                                                                             | 215773                                     | 101.86                                                   | 6.82                                                     | 12.26                                               | 59.64                                                | 34.43          |
| 13                                                                               | 51                     | 6               | 114.5                                        | 822911          | 163608                                                                                                             | 214865                                     | 111.92                                                   | 6.88                                                     | 12.37                                               | 59.26                                                | 33.82          |
| 14                                                                               | 1                      | 8               | 124.6                                        | 824293          | 164251                                                                                                             | 213923                                     | 121.96                                                   | 6.93                                                     | 12.48                                               | 59.01                                                | 33.27          |
| t <sub>correct</sub> (min)                                                       | Partial pressure (kPa) |                 | Rate (mmol L <sup>-1</sup> h <sup>-1</sup> ) |                 | d[H <sub>2</sub> O <sub>2</sub> ]/dt (mmol L <sup>-1</sup> h <sup>-1</sup> )                                       | Σ[H <sub>2</sub> ] (mmol L <sup>-1</sup> ) | [H <sub>2</sub> O <sub>2</sub> ] (mmol L <sup>-1</sup> ) | S <sub>e</sub> (—)                                       | Σ <sub>2</sub> [H <sub>2</sub> O <sub>2</sub> ] (h) | Σ <sub>1</sub> /[H <sub>2</sub> O <sub>2</sub> ] (—) |                |
|                                                                                  | P <sub>H2</sub>        | P <sub>O2</sub> | r <sub>H2</sub>                              | r <sub>O2</sub> |                                                                                                                    |                                            |                                                          |                                                          |                                                     |                                                      |                |
| 0.00                                                                             | 16.90                  | 29.02           | 92.94                                        | 67.49           | 42.05                                                                                                              | 0.00                                       | 0.00                                                     |                                                          | 0.000                                               | 0.000                                                |                |
| 11.42                                                                            | 16.90                  | 29.22           | 92.72                                        | 66.41           | 40.09                                                                                                              | 17.67                                      | 7.82                                                     | 0.44                                                     | 0.095                                               | 2.260                                                |                |
| 21.49                                                                            | 16.90                  | 29.40           | 92.52                                        | 65.44           | 38.36                                                                                                              | 33.21                                      | 14.40                                                    | 0.43                                                     | 0.181                                               | 2.306                                                |                |
| 31.52                                                                            | 16.91                  | 29.58           | 92.29                                        | 64.46           | 36.64                                                                                                              | 48.67                                      | 20.67                                                    | 0.42                                                     | 0.268                                               | 2.354                                                |                |
| 41.59                                                                            | 16.88                  | 29.77           | 92.20                                        | 63.50           | 34.81                                                                                                              | 64.14                                      | 26.67                                                    | 0.42                                                     | 0.357                                               | 2.405                                                |                |
| 51.62                                                                            | 16.91                  | 29.94           | 91.88                                        | 62.50           | 33.12                                                                                                              | 79.53                                      | 32.34                                                    | 0.41                                                     | 0.447                                               | 2.459                                                |                |
| 61.69                                                                            | 16.92                  | 30.11           | 91.62                                        | 61.54           | 31.47                                                                                                              | 94.93                                      | 37.76                                                    | 0.40                                                     | 0.538                                               | 2.514                                                |                |
| 71.72                                                                            | 16.96                  | 30.27           | 91.24                                        | 60.56           | 29.88                                                                                                              | 110.22                                     | 42.89                                                    | 0.39                                                     | 0.631                                               | 2.570                                                |                |
| 81.79                                                                            | 17.00                  | 30.45           | 90.87                                        | 59.49           | 28.11                                                                                                              | 125.49                                     | 47.76                                                    | 0.38                                                     | 0.726                                               | 2.628                                                |                |
| 91.82                                                                            | 17.07                  | 30.61           | 90.34                                        | 58.43           | 26.51                                                                                                              | 140.64                                     | 52.32                                                    | 0.37                                                     | 0.823                                               | 2.688                                                |                |
| 101.86                                                                           | 17.11                  | 30.76           | 89.97                                        | 57.49           | 25.00                                                                                                              | 155.72                                     | 56.63                                                    | 0.36                                                     | 0.921                                               | 2.750                                                |                |
| 111.92                                                                           | 17.19                  | 30.91           | 89.40                                        | 56.47           | 23.53                                                                                                              | 170.77                                     | 60.70                                                    | 0.36                                                     | 1.021                                               | 2.813                                                |                |
| 121.96                                                                           | 17.23                  | 31.05           | 89.03                                        | 55.55           | 22.06                                                                                                              | 185.69                                     | 64.51                                                    | 0.35                                                     | 1.123                                               | 2.878                                                |                |

## S2. Original CASTEP data; Energy level of H on the first layer of M-Pd(111)

DFT studies were preliminarily performed to elucidate the great addition effects of Pt or Ir to the Pd-PVP colloid catalyst and the little effects of Ru, Rh and Au. First-principles quantum mechanics calculations were carried out with supercell models using CASTEP [1], which employs the density functional theory plane-wave pseudopotential method. GGA-PBE functional [2] was used with ultrasoft pseudopotentials [3]. The energy cutoff and Monkhorst-Pack mesh of k points were 400 eV and (4×4×1), respectively for all the models. A vacuum space with a height of 20 Å was placed over the surface of each supercell model.

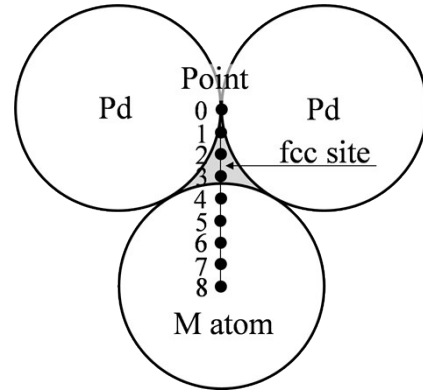

Fig. S1. Schematic overview of points over which H atom was located.

Adsorption energies of H were calculated using the models formed by replacing the central surface Pd atom of the Pd (111) 3×3×3 supercell with an M atom (M = Pt, Ir, Ru, Rh and Au) as shown in Fig. S1. These supercell slabs were geometrically optimized by fixing the third layer and in spin-polarized condition applying the formal spin as initial. Table S1 shows the coordinates of the geometrically optimized structures.

The energy level of a H atom located on the surface of a supercell slab was determined by Eq. (S1), in which  $\Delta E_H$ ,  $E[\text{Slab}_1]$ ,  $E[\text{Slab}_0]$ , and  $E[\text{H}_2]$  represent the energy level of the H atom, the energies of the H-bearing slab, the mother slab, and  $\text{H}_2$ , respectively. Here, calculation of  $[\text{Slab}_1]$  and  $[\text{Slab}_0]$  was performed in non-spin-polarized mode, because it was confirmed that the state of spin should be ignored for determining  $\Delta E_H$  by Eq. (1) in separated calculations.

$$\Delta E_H = E[\text{Slab}_1] - E[\text{Slab}_0] - E[\text{H}_2]/2 \quad (\text{S1})$$

The adsorption energy profiles of H were determined right above the line segment connecting the center of the M atom and the point of contact of the adjacent two Pd atoms through the fcc hollow site. Points 0 to 8 were defined at equal intervals on the line segment, and H was vertically placed over each point by varying the height,  $h$  (0.1 Å intervals). Single-point energy calculation of  $E[\text{Slab}_0]$  and  $E[\text{Slab}_1]$  was carried out, and  $\Delta E_H$  was determined according to Eq. (S1) at each height. The adsorption energy of H at each point,  $\Delta E_{\text{ad}}$ , was determined as the minimum value of  $\Delta E_H$  by applying a quadratic polynomial to the smallest 3 values of  $\Delta E_H$ . Table S2 shows the coordinates of H atom and corresponding final energies.

### References:

- [1] Clark, S. J.; Segall, M. D.; Pickard, C. J.; Hasnip, P. J.; Probert, M. J.; Refson, K.; Payne, M. C. *Zeitschrift fuer Kristallographie* **2005**, 220, 567-570.
- [2] Perdew, J. P.; Burke, K.; Ernzerhof, M. *Phys. Rev. Lett.* **1996**, 77, 3865-3868.
- [3] Vanderbilt, D. *Phys. Rev. B* **1990**, 41, 7892-7895.

Table S1. Coordinates data for structure-optimized M-Pd(111) models.

(1) M = Pd

| Atom | No. | Fractional coordinates of atoms |          |          | Lattice parameters |          |
|------|-----|---------------------------------|----------|----------|--------------------|----------|
|      |     | u                               | v        | w        |                    |          |
| Pd   | 1   | -0.000252                       | 0.000234 | 0.184082 | a (angstrom)       | 8.3834   |
| Pd   | 2   | 0.222166                        | 0.111143 | 0.092070 | b (angstrom)       | 8.3834   |
| Pd   | 3   | 0.111111                        | 0.222222 | 0.000000 | c (angstrom)       | 24.5634  |
| Pd   | 4   | 0.333108                        | 0.000220 | 0.184090 | Alpha (deg)        | 90.0000  |
| Pd   | 5   | 0.555546                        | 0.111121 | 0.092070 | Beta (deg)         | 90.0000  |
| Pd   | 6   | 0.444444                        | 0.222222 | 0.000000 | Gamma (deg)        | 120.0000 |
| Pd   | 7   | 0.666459                        | 0.000226 | 0.184075 |                    |          |
| Pd   | 8   | 0.888840                        | 0.111111 | 0.092069 |                    |          |
| Pd   | 9   | 0.777778                        | 0.222222 | 0.000000 |                    |          |
| Pd   | 10  | -0.000227                       | 0.333540 | 0.184071 |                    |          |
| Pd   | 11  | 0.222197                        | 0.444472 | 0.092068 |                    |          |
| Pd   | 12  | 0.111111                        | 0.555556 | 0.000000 |                    |          |
| Pd   | 13  | 0.333090                        | 0.333572 | 0.184077 |                    |          |
| Pd   | 14  | 0.555525                        | 0.444499 | 0.092070 |                    |          |
| Pd   | 15  | 0.444444                        | 0.555556 | 0.000000 |                    |          |
| Pd   | 16  | 0.666430                        | 0.333547 | 0.184091 |                    |          |
| Pd   | 17  | 0.888870                        | 0.444457 | 0.092067 |                    |          |
| Pd   | 18  | 0.777778                        | 0.555556 | 0.000000 |                    |          |
| Pd   | 19  | -0.000224                       | 0.666912 | 0.184094 |                    |          |
| Pd   | 20  | 0.222211                        | 0.777800 | 0.092071 |                    |          |
| Pd   | 21  | 0.111111                        | 0.888889 | 0.000000 |                    |          |
| Pd   | 22  | 0.333113                        | 0.666885 | 0.184076 |                    |          |
| Pd   | 23  | 0.555546                        | 0.777828 | 0.092070 |                    |          |
| Pd   | 24  | 0.444444                        | 0.888889 | 0.000000 |                    |          |
| Pd   | 25  | 0.666430                        | 0.666925 | 0.184078 |                    |          |
| Pd   | 26  | 0.888841                        | 0.777834 | 0.092071 |                    |          |
| Pd   | 27  | 0.777778                        | 0.888889 | 0.000000 |                    |          |

(2) M = Pt

| Atom | No. | Fractional coordinates of atoms |           |          | Lattice parameters |          |
|------|-----|---------------------------------|-----------|----------|--------------------|----------|
|      |     | u                               | v         | w        |                    |          |
| Pd   | 1   | 0.000456                        | 0.000903  | 0.184679 | a (angstrom)       | 8.3834   |
| Pd   | 2   | 0.221241                        | 0.108831  | 0.091436 | b (angstrom)       | 8.3834   |
| Pd   | 3   | 0.111111                        | 0.222222  | 0.000000 | c (angstrom)       | 24.5634  |
| Pd   | 4   | 0.333385                        | 0.000563  | 0.184939 | Alpha (deg)        | 90.0000  |
| Pd   | 5   | 0.554917                        | 0.111843  | 0.092468 | Beta (deg)         | 90.0000  |
| Pd   | 6   | 0.444444                        | 0.222222  | 0.000000 | Gamma (deg)        | 120.0000 |
| Pd   | 7   | 0.666687                        | -0.000037 | 0.184241 |                    |          |
| Pd   | 8   | 0.888453                        | 0.110843  | 0.092126 |                    |          |
| Pd   | 9   | 0.777778                        | 0.222222  | 0.000000 |                    |          |
| Pd   | 10  | 0.000929                        | 0.333462  | 0.184552 |                    |          |
| Pd   | 11  | 0.220796                        | 0.445874  | 0.091340 |                    |          |
| Pd   | 12  | 0.111111                        | 0.555556  | 0.000000 |                    |          |
| Pd   | 13  | 0.557829                        | 0.445390  | 0.091439 |                    |          |
| Pd   | 14  | 0.444444                        | 0.555556  | 0.000000 |                    |          |
| Pd   | 15  | 0.666111                        | 0.333356  | 0.184973 |                    |          |
| Pd   | 16  | 0.888694                        | 0.444139  | 0.092497 |                    |          |
| Pd   | 17  | 0.777778                        | 0.555556  | 0.000000 |                    |          |
| Pd   | 18  | -0.000257                       | 0.667109  | 0.184098 |                    |          |

|    |    |          |          |          |
|----|----|----------|----------|----------|
| Pd | 19 | 0.222480 | 0.777881 | 0.092512 |
| Pd | 20 | 0.111111 | 0.888889 | 0.000000 |
| Pd | 21 | 0.333278 | 0.665783 | 0.184591 |
| Pd | 22 | 0.555675 | 0.778217 | 0.092131 |
| Pd | 23 | 0.444444 | 0.888889 | 0.000000 |
| Pd | 24 | 0.665815 | 0.666308 | 0.184666 |
| Pd | 25 | 0.888720 | 0.778155 | 0.092515 |
| Pd | 26 | 0.777778 | 0.888889 | 0.000000 |
| Pt | 1  | 0.334642 | 0.332255 | 0.181243 |

(3) M = Ir

| Atom | No. | Fractional coordinates of atoms |          |          | Lattice parameters |          |
|------|-----|---------------------------------|----------|----------|--------------------|----------|
|      |     | u                               | v        | w        |                    |          |
| Pd   | 1   | 0.003422                        | 0.004083 | 0.185841 | a (angstrom)       | 8.3834   |
| Pd   | 2   | 0.220924                        | 0.108502 | 0.093216 | b (angstrom)       | 8.3834   |
| Pd   | 3   | 0.111111                        | 0.222222 | 0.000000 | c (angstrom)       | 24.5634  |
| Pd   | 4   | 0.333944                        | 0.003719 | 0.185858 | Alpha (deg)        | 90.0000  |
| Pd   | 5   | 0.556372                        | 0.110297 | 0.091712 | Beta (deg)         | 90.0000  |
| Pd   | 6   | 0.444444                        | 0.222222 | 0.000000 | Gamma (deg)        | 120.0000 |
| Pd   | 7   | 0.666655                        | 0.000011 | 0.184219 |                    |          |
| Pd   | 8   | 0.887364                        | 0.110302 | 0.091698 |                    |          |
| Pd   | 9   | 0.777778                        | 0.222222 | 0.000000 |                    |          |
| Pd   | 10  | 0.003035                        | 0.332621 | 0.185767 |                    |          |
| Pd   | 11  | 0.220708                        | 0.445956 | 0.093148 |                    |          |
| Pd   | 12  | 0.111111                        | 0.555556 | 0.000000 |                    |          |
| Pd   | 13  | 0.558165                        | 0.445743 | 0.093217 |                    |          |
| Pd   | 14  | 0.444444                        | 0.555556 | 0.000000 |                    |          |
| Pd   | 15  | 0.662948                        | 0.332723 | 0.185857 |                    |          |
| Pd   | 16  | 0.888673                        | 0.444239 | 0.092756 |                    |          |
| Pd   | 17  | 0.777778                        | 0.555556 | 0.000000 |                    |          |
| Pd   | 18  | -0.000172                       | 0.666838 | 0.185046 |                    |          |
| Pd   | 19  | 0.222426                        | 0.777992 | 0.092756 |                    |          |
| Pd   | 20  | 0.111111                        | 0.888889 | 0.000000 |                    |          |
| Pd   | 21  | 0.334046                        | 0.663633 | 0.185768 |                    |          |
| Pd   | 22  | 0.556367                        | 0.779305 | 0.091698 |                    |          |
| Pd   | 23  | 0.444444                        | 0.888889 | 0.000000 |                    |          |
| Pd   | 24  | 0.662584                        | 0.663245 | 0.185841 |                    |          |
| Pd   | 25  | 0.888608                        | 0.778059 | 0.092673 |                    |          |
| Pd   | 26  | 0.777778                        | 0.888889 | 0.000000 |                    |          |
| Ir   | 1   | 0.333122                        | 0.333545 | 0.179040 |                    |          |

(4) M = Ru

| Atom | No. | Fractional coordinates of atoms |           |          | Lattice parameters |          |
|------|-----|---------------------------------|-----------|----------|--------------------|----------|
|      |     | u                               | v         | w        |                    |          |
| Ru   | 1   | 0.331161                        | 0.332388  | 0.174821 | a (angstrom)       | 8.3834   |
| Pd   | 1   | 0.006722                        | 0.007171  | 0.184618 | b (angstrom)       | 8.3834   |
| Pd   | 2   | 0.221729                        | 0.109877  | 0.090996 | c (angstrom)       | 24.5634  |
| Pd   | 3   | 0.111111                        | 0.222222  | 0.000000 | Alpha (deg)        | 90.0000  |
| Pd   | 4   | 0.332729                        | 0.006227  | 0.184561 | Beta (deg)         | 90.0000  |
| Pd   | 5   | 0.556370                        | 0.110914  | 0.092705 | Gamma (deg)        | 120.0000 |
| Pd   | 6   | 0.444444                        | 0.222222  | 0.000000 |                    |          |
| Pd   | 7   | 0.666207                        | -0.000024 | 0.184910 |                    |          |
| Pd   | 8   | 0.888126                        | 0.110784  | 0.092478 |                    |          |

|    |    |           |          |          |
|----|----|-----------|----------|----------|
| Pd | 9  | 0.777778  | 0.222222 | 0.000000 |
| Pd | 10 | 0.006050  | 0.333740 | 0.184654 |
| Pd | 11 | 0.221473  | 0.445297 | 0.091078 |
| Pd | 12 | 0.111111  | 0.555556 | 0.000000 |
| Pd | 13 | 0.557357  | 0.445419 | 0.091977 |
| Pd | 14 | 0.444444  | 0.555556 | 0.000000 |
| Pd | 15 | 0.660820  | 0.333904 | 0.185144 |
| Pd | 16 | 0.888469  | 0.444738 | 0.093545 |
| Pd | 17 | 0.777778  | 0.555556 | 0.000000 |
| Pd | 18 | -0.000565 | 0.666897 | 0.185306 |
| Pd | 19 | 0.222036  | 0.777835 | 0.093205 |
| Pd | 20 | 0.111111  | 0.888889 | 0.000000 |
| Pd | 21 | 0.332798  | 0.660688 | 0.184492 |
| Pd | 22 | 0.556104  | 0.778657 | 0.092451 |
| Pd | 23 | 0.444444  | 0.888889 | 0.000000 |
| Pd | 24 | 0.660352  | 0.660651 | 0.184901 |
| Pd | 25 | 0.888724  | 0.777364 | 0.093493 |
| Pd | 26 | 0.777778  | 0.888889 | 0.000000 |

(5) M = Rh

| Atom | No. | Fractional coordinates of atoms |           |          | Lattice parameters |          |
|------|-----|---------------------------------|-----------|----------|--------------------|----------|
|      |     | u                               | v         | w        |                    |          |
| Rh   | 1   | 0.333823                        | 0.334114  | 0.179170 | a (angstrom)       | 8.3834   |
| Pd   | 1   | 0.000371                        | 0.001837  | 0.184467 | b (angstrom)       | 8.3834   |
| Pd   | 2   | 0.218998                        | 0.108325  | 0.091480 | c (angstrom)       | 24.5634  |
| Pd   | 3   | 0.111111                        | 0.222222  | 0.000000 | Alpha (deg)        | 90.0000  |
| Pd   | 4   | 0.330840                        | 0.000484  | 0.183599 | Beta (deg)         | 90.0000  |
| Pd   | 5   | 0.554980                        | 0.110622  | 0.091674 | Gamma (deg)        | 120.0000 |
| Pd   | 6   | 0.444444                        | 0.222222  | 0.000000 |                    |          |
| Pd   | 7   | 0.665151                        | -0.000167 | 0.183648 |                    |          |
| Pd   | 8   | 0.888775                        | 0.110713  | 0.092122 |                    |          |
| Pd   | 9   | 0.777778                        | 0.222222  | 0.000000 |                    |          |
| Pd   | 10  | 0.000291                        | 0.333616  | 0.183889 |                    |          |
| Pd   | 11  | 0.219699                        | 0.445497  | 0.091308 |                    |          |
| Pd   | 12  | 0.111111                        | 0.555556  | 0.000000 |                    |          |
| Pd   | 13  | 0.556237                        | 0.444770  | 0.091499 |                    |          |
| Pd   | 14  | 0.444444                        | 0.555556  | 0.000000 |                    |          |
| Pd   | 15  | 0.663442                        | 0.332252  | 0.183954 |                    |          |
| Pd   | 16  | 0.886877                        | 0.443626  | 0.092048 |                    |          |
| Pd   | 17  | 0.777778                        | 0.555556  | 0.000000 |                    |          |
| Pd   | 18  | -0.001923                       | 0.665961  | 0.183909 |                    |          |
| Pd   | 19  | 0.221051                        | 0.776932  | 0.092170 |                    |          |
| Pd   | 20  | 0.111111                        | 0.888889  | 0.000000 |                    |          |
| Pd   | 21  | 0.331793                        | 0.665520  | 0.184131 |                    |          |
| Pd   | 22  | 0.554406                        | 0.777398  | 0.091867 |                    |          |
| Pd   | 23  | 0.444444                        | 0.888889  | 0.000000 |                    |          |
| Pd   | 24  | 0.662483                        | 0.662931  | 0.183523 |                    |          |
| Pd   | 25  | 0.888833                        | 0.778617  | 0.092320 |                    |          |
| Pd   | 26  | 0.777778                        | 0.888889  | 0.000000 |                    |          |

(6) M = Au

| Atom | No. | Fractional coordinates of atoms |   |   | Lattice parameters |  |
|------|-----|---------------------------------|---|---|--------------------|--|
|      |     | u                               | v | w |                    |  |

|    |    |           |           |          |              |          |
|----|----|-----------|-----------|----------|--------------|----------|
| Pd | 1  | -0.002338 | -0.000919 | 0.184110 | a (angstrom) | 8.3834   |
| Pd | 2  | 0.222421  | 0.112035  | 0.092658 | b (angstrom) | 8.3834   |
| Pd | 3  | 0.111111  | 0.222222  | 0.000000 | c (angstrom) | 24.5634  |
| Pd | 4  | 0.334064  | -0.001257 | 0.184076 | Alpha (deg)  | 90.0000  |
| Pd | 5  | 0.555836  | 0.110843  | 0.092008 | Beta (deg)   | 90.0000  |
| Pd | 6  | 0.444444  | 0.222222  | 0.000000 | Gamma (deg)  | 120.0000 |
| Pd | 7  | 0.666556  | 0.000148  | 0.183901 |              |          |
| Pd | 8  | 0.887998  | 0.110856  | 0.091972 |              |          |
| Pd | 9  | 0.777778  | 0.222222  | 0.000000 |              |          |
| Pd | 10 | -0.002440 | 0.333081  | 0.184038 |              |          |
| Pd | 11 | 0.222664  | 0.443966  | 0.092671 |              |          |
| Pd | 12 | 0.111111  | 0.555556  | 0.000000 |              |          |
| Pd | 13 | 0.554584  | 0.444197  | 0.092678 |              |          |
| Pd | 14 | 0.444444  | 0.555556  | 0.000000 |              |          |
| Pd | 15 | 0.667918  | 0.332566  | 0.184073 |              |          |
| Pd | 16 | 0.889569  | 0.446311  | 0.091845 |              |          |
| Pd | 17 | 0.777778  | 0.555556  | 0.000000 |              |          |
| Pd | 18 | -0.000505 | 0.667179  | 0.184269 |              |          |
| Pd | 19 | 0.220370  | 0.777138  | 0.091833 |              |          |
| Pd | 20 | 0.111111  | 0.888889  | 0.000000 |              |          |
| Pd | 21 | 0.333573  | 0.669089  | 0.184037 |              |          |
| Pd | 22 | 0.555846  | 0.778705  | 0.091970 |              |          |
| Pd | 23 | 0.444444  | 0.888889  | 0.000000 |              |          |
| Pd | 24 | 0.667600  | 0.669007  | 0.184102 |              |          |
| Pd | 25 | 0.889811  | 0.776865  | 0.091943 |              |          |
| Pd | 26 | 0.777778  | 0.888889  | 0.000000 |              |          |
| Au | 1  | 0.332969  | 0.333671  | 0.190819 |              |          |

Table S2. Coordinates of H atom and corresponding final energy.

(1) M = Pd

| Model   | Point | Height<br>(Å) | Fractional coordinates of H atom |          |          | Final Energy<br>(eV) | $\Delta E_H$<br>(kcal g-atom <sup>-1</sup> ) |
|---------|-------|---------------|----------------------------------|----------|----------|----------------------|----------------------------------------------|
|         |       |               | u                                | v        | w        |                      |                                              |
| H2      |       |               |                                  |          |          | -31.69234394         |                                              |
| Pd      |       |               |                                  |          |          | -21553.607893        |                                              |
| Pd_L107 | 8     | 1.5           | 0.333095                         | 0.333574 | 0.245144 | -21569.494802        | -0.94                                        |
| Pd_L108 | 8     | 1.6           | 0.333095                         | 0.333574 | 0.249215 | -21569.529385        | -1.74                                        |
| Pd_L109 | 8     | 1.7           | 0.333095                         | 0.333574 | 0.253286 | -21569.423412        | 0.71                                         |
| Pd_L216 | 7     | 1.4           | 0.353921                         | 0.375239 | 0.241073 | -21569.339118        | 2.65                                         |
| Pd_L217 | 7     | 1.5           | 0.353921                         | 0.375239 | 0.245144 | -21569.528750        | -1.72                                        |
| Pd_L218 | 7     | 1.6           | 0.353921                         | 0.375239 | 0.249215 | -21569.516794        | -1.45                                        |
| Pd_L226 | 6     | 1.4           | 0.374760                         | 0.416362 | 0.241073 | -21569.545943        | -2.12                                        |
| Pd_L227 | 6     | 1.5           | 0.374760                         | 0.416362 | 0.245144 | -21569.557619        | -2.39                                        |
| Pd_L228 | 6     | 1.6           | 0.374760                         | 0.416362 | 0.249215 | -21569.456379        | -0.05                                        |
| Pd_L234 | 5     | 1.2           | 0.395600                         | 0.458571 | 0.232930 | -21569.598738        | -3.34                                        |
| Pd_L235 | 5     | 1.3           | 0.395600                         | 0.458571 | 0.237002 | -21569.661680        | -4.79                                        |
| Pd_L236 | 5     | 1.4           | 0.395600                         | 0.458571 | 0.241073 | -21569.616828        | -3.75                                        |
| Pd_L241 | 4     | 0.9           | 0.416425                         | 0.500236 | 0.220717 | -21569.751970        | -6.87                                        |
| Pd_L242 | 4     | 1.0           | 0.416425                         | 0.500236 | 0.224788 | -21569.843090        | -8.97                                        |
| Pd_L243 | 4     | 1.1           | 0.416425                         | 0.500236 | 0.228859 | -21569.857946        | -9.31                                        |
| Pd_L250 | 3     | 0.8           | 0.437265                         | 0.541908 | 0.216646 | -21570.057951        | -13.93                                       |
| Pd_L251 | 3     | 0.9           | 0.437265                         | 0.541908 | 0.220717 | -21570.058351        | -13.93                                       |
| Pd_L252 | 3     | 1.0           | 0.437265                         | 0.541908 | 0.224788 | -21570.019091        | -13.03                                       |
| Pd_L260 | 2     | 0.8           | 0.458105                         | 0.583568 | 0.216646 | -21570.028070        | -13.24                                       |



|         |   |     |          |          |          |               |        |
|---------|---|-----|----------|----------|----------|---------------|--------|
| Pd_L261 | 2 | 0.9 | 0.458105 | 0.583568 | 0.220717 | -21570.040173 | -13.52 |
| Pd_L262 | 2 | 1.0 | 0.458105 | 0.583568 | 0.224788 | -21570.010189 | -12.82 |
| Pd_L271 | 1 | 0.9 | 0.478930 | 0.625233 | 0.220717 | -21569.947970 | -11.39 |
| Pd_L272 | 1 | 1.0 | 0.478930 | 0.625233 | 0.224788 | -21569.961692 | -11.71 |
| Pd_L273 | 1 | 1.1 | 0.478930 | 0.625233 | 0.228859 | -21569.923763 | -10.83 |
| Pd_L281 | 0 | 0.9 | 0.499770 | 0.666905 | 0.220717 | -21569.892484 | -10.11 |
| Pd_L282 | 0 | 1.0 | 0.499770 | 0.666905 | 0.224788 | -21569.928645 | -10.94 |
| Pd_L283 | 0 | 1.1 | 0.499770 | 0.666905 | 0.228859 | -21569.907355 | -10.45 |

(2) M = Pt

| Model       | Point | Height<br>(Å) | Fractional coordinates of H atom |          |          | Final Energy<br>(eV) | $\Delta E_H$<br>(kcal g-atom <sup>-1</sup> ) |
|-------------|-------|---------------|----------------------------------|----------|----------|----------------------|----------------------------------------------|
|             |       |               | u                                | v        | w        |                      |                                              |
| H2          |       |               |                                  |          |          | -31.69234394         |                                              |
| PdPt        |       |               |                                  |          |          | -21473.102582        |                                              |
| PdPt_H_L107 | 8     | 1.5           | 0.334638                         | 0.332258 | 0.242310 | -21489.409257        | -10.62                                       |
| PdPt_H_L108 | 8     | 1.6           | 0.334638                         | 0.332258 | 0.246381 | -21489.473002        | -12.09                                       |
| PdPt_H_L109 | 8     | 1.7           | 0.334638                         | 0.332258 | 0.250452 | -21489.370198        | -9.72                                        |
| PdPt_H_L216 | 7     | 1.4           | 0.355257                         | 0.373975 | 0.238663 | -21489.238145        | -6.67                                        |
| PdPt_H_L217 | 7     | 1.5           | 0.355257                         | 0.373975 | 0.242734 | -21489.449810        | -11.55                                       |
| PdPt_H_L218 | 7     | 1.6           | 0.355257                         | 0.373975 | 0.246805 | -21489.442288        | -11.38                                       |
| PdPt_H_L226 | 6     | 1.4           | 0.375862                         | 0.415697 | 0.239086 | -21489.428195        | -11.06                                       |
| PdPt_H_L227 | 6     | 1.5           | 0.375862                         | 0.415697 | 0.243157 | -21489.433538        | -11.18                                       |
| PdPt_H_L228 | 6     | 1.6           | 0.375862                         | 0.415697 | 0.247228 | -21489.316545        | -8.48                                        |
| PdPt_H_L234 | 5     | 1.2           | 0.396481                         | 0.457425 | 0.231367 | -21489.392752        | -10.24                                       |
| PdPt_H_L235 | 5     | 1.3           | 0.396481                         | 0.457425 | 0.235438 | -21489.455608        | -11.69                                       |
| PdPt_H_L236 | 5     | 1.4           | 0.396481                         | 0.457425 | 0.239509 | -21489.403335        | -10.48                                       |
| PdPt_H_L242 | 4     | 1.0           | 0.417100                         | 0.499154 | 0.223648 | -21489.494378        | -12.58                                       |
| PdPt_H_L243 | 4     | 1.1           | 0.417100                         | 0.499154 | 0.227719 | -21489.520101        | -13.18                                       |
| PdPt_H_L244 | 4     | 1.2           | 0.417100                         | 0.499154 | 0.231791 | -21489.474243        | -12.12                                       |
| PdPt_H_L250 | 3     | 0.8           | 0.437706                         | 0.540876 | 0.215929 | -21489.553495        | -13.95                                       |
| PdPt_H_L251 | 3     | 0.9           | 0.437706                         | 0.540876 | 0.220001 | -21489.571295        | -14.36                                       |
| PdPt_H_L252 | 3     | 1.0           | 0.437706                         | 0.540876 | 0.224072 | -21489.544976        | -13.75                                       |
| PdPt_H_L260 | 2     | 0.8           | 0.458325                         | 0.582605 | 0.216353 | -21489.447317        | -11.50                                       |
| PdPt_H_L261 | 2     | 0.9           | 0.458325                         | 0.582605 | 0.220424 | -21489.475067        | -12.14                                       |
| PdPt_H_L262 | 2     | 1.0           | 0.458325                         | 0.582605 | 0.224495 | -21489.458786        | -11.76                                       |
| PdPt_H_L271 | 1     | 0.9           | 0.478930                         | 0.624315 | 0.220843 | -21489.368999        | -9.69                                        |
| PdPt_H_L272 | 1     | 1.0           | 0.478930                         | 0.624315 | 0.224914 | -21489.394458        | -10.28                                       |
| PdPt_H_L273 | 1     | 1.1           | 0.478930                         | 0.624315 | 0.228986 | -21489.366454        | -9.63                                        |
| PdPt_H_L281 | 0     | 0.9           | 0.499549                         | 0.666043 | 0.221267 | -21489.337985        | -8.98                                        |
| PdPt_H_L282 | 0     | 1.0           | 0.499549                         | 0.666043 | 0.225338 | -21489.379326        | -9.93                                        |
| PdPt_H_L283 | 0     | 1.1           | 0.499549                         | 0.666043 | 0.229409 | -21489.361868        | -9.53                                        |

(3) M = Ir

| Model     | Point | Height<br>(Å) | Fractional coordinates of H atom |          |          | Final Energy<br>(eV) | $\Delta E_H$<br>(kcal g-atom <sup>-1</sup> ) |
|-----------|-------|---------------|----------------------------------|----------|----------|----------------------|----------------------------------------------|
|           |       |               | u                                | v        | w        |                      |                                              |
| H2        |       |               |                                  |          |          | -31.69234394         |                                              |
| PdIr      |       |               |                                  |          |          | -21312.795238        |                                              |
| PdIr_L207 | 8     | 1.5           | 0.333123                         | 0.333540 | 0.240108 | -21329.267734        | -14.44                                       |
| PdIr_L208 | 8     | 1.6           | 0.333123                         | 0.333540 | 0.244179 | -21329.380021        | -17.03                                       |
| PdIr_L209 | 8     | 1.7           | 0.333123                         | 0.333540 | 0.248250 | -21329.313656        | -15.50                                       |
| PdIr_L217 | 7     | 1.5           | 0.353769                         | 0.374782 | 0.240951 | -21329.342808        | -16.17                                       |
| PdIr_L218 | 7     | 1.6           | 0.353769                         | 0.374782 | 0.245022 | -21329.360682        | -16.59                                       |

|           |   |     |          |          |          |               |        |
|-----------|---|-----|----------|----------|----------|---------------|--------|
| PdIr_L219 | 7 | 1.7 | 0.353769 | 0.374782 | 0.249093 | -21329.239460 | -13.79 |
| PdIr_L226 | 6 | 1.4 | 0.374416 | 0.416011 | 0.237726 | -21329.317887 | -15.60 |
| PdIr_L227 | 6 | 1.5 | 0.374416 | 0.416011 | 0.241797 | -21329.337949 | -16.06 |
| PdIr_L228 | 6 | 1.6 | 0.374416 | 0.416011 | 0.245868 | -21329.233105 | -13.64 |
| PdIr_L234 | 5 | 1.2 | 0.395063 | 0.457253 | 0.230431 | -21329.246764 | -13.96 |
| PdIr_L235 | 5 | 1.3 | 0.395063 | 0.457253 | 0.234502 | -21329.324548 | -15.75 |
| PdIr_L236 | 5 | 1.4 | 0.395063 | 0.457253 | 0.238573 | -21329.284711 | -14.83 |
| PdIr_L242 | 4 | 1.0 | 0.415723 | 0.498489 | 0.223135 | -21329.280642 | -14.74 |
| PdIr_L243 | 4 | 1.1 | 0.415723 | 0.498489 | 0.227206 | -21329.329986 | -15.88 |
| PdIr_L244 | 4 | 1.2 | 0.415723 | 0.498489 | 0.231278 | -21329.302699 | -15.25 |
| PdIr_L250 | 3 | 0.8 | 0.436370 | 0.539731 | 0.215836 | -21329.259425 | -14.25 |
| PdIr_L251 | 3 | 0.9 | 0.436370 | 0.539731 | 0.219907 | -21329.304849 | -15.30 |
| PdIr_L252 | 3 | 1.0 | 0.436370 | 0.539731 | 0.223978 | -21329.302287 | -15.24 |
| PdIr_L261 | 2 | 0.9 | 0.457016 | 0.580960 | 0.220754 | -21329.175776 | -12.32 |
| PdIr_L262 | 2 | 1.0 | 0.457016 | 0.580960 | 0.224825 | -21329.181910 | -12.46 |
| PdIr_L263 | 2 | 1.1 | 0.457016 | 0.580960 | 0.228896 | -21329.141732 | -11.54 |
| PdIr_L271 | 1 | 0.9 | 0.477663 | 0.622202 | 0.221601 | -21329.047662 | -9.37  |
| PdIr_L272 | 1 | 1.0 | 0.477663 | 0.622202 | 0.225672 | -21329.095237 | -10.47 |
| PdIr_L273 | 1 | 1.1 | 0.477663 | 0.622202 | 0.229743 | -21329.085031 | -10.23 |
| PdIr_L281 | 0 | 0.9 | 0.498310 | 0.663432 | 0.222443 | -21329.020003 | -8.73  |
| PdIr_L282 | 0 | 1.0 | 0.498310 | 0.663432 | 0.226514 | -21329.077796 | -10.06 |
| PdIr_L283 | 0 | 1.1 | 0.498310 | 0.663432 | 0.230585 | -21329.072771 | -9.95  |

(4) M = Ru

| Model     | Point | Height<br>(Å) | Fractional coordinates of H atom |          |          | Final Energy<br>(eV) | $\Delta E_H$<br>(kcal g-atom <sup>-1</sup> ) |
|-----------|-------|---------------|----------------------------------|----------|----------|----------------------|----------------------------------------------|
|           |       |               | u                                | v        | w        |                      |                                              |
| H2        |       |               |                                  |          |          | -31.69234394         |                                              |
| PdRu      |       |               |                                  |          |          | -23356.234642        |                                              |
| PdRu_L207 | 8     | 1.5           | 0.331167                         | 0.332395 | 0.235886 | -23372.382579        | -6.96                                        |
| PdRu_L208 | 8     | 1.6           | 0.331167                         | 0.332395 | 0.239957 | -23372.479611        | -9.20                                        |
| PdRu_L209 | 8     | 1.7           | 0.331167                         | 0.332395 | 0.244028 | -23372.428989        | -8.03                                        |
| PdRu_L217 | 7     | 1.5           | 0.351841                         | 0.373424 | 0.237124 | -23372.458211        | -8.70                                        |
| PdRu_L218 | 7     | 1.6           | 0.351841                         | 0.373424 | 0.241195 | -23372.466060        | -8.88                                        |
| PdRu_L219 | 7     | 1.7           | 0.351841                         | 0.373424 | 0.245266 | -23372.362726        | -6.50                                        |
| PdRu_L226 | 6     | 1.4           | 0.372515                         | 0.414453 | 0.234286 | -23372.461658        | -8.78                                        |
| PdRu_L227 | 6     | 1.5           | 0.372515                         | 0.414453 | 0.238357 | -23372.464351        | -8.84                                        |
| PdRu_L228 | 6     | 1.6           | 0.372515                         | 0.414453 | 0.242428 | -23372.369422        | -6.66                                        |
| PdRu_L234 | 5     | 1.2           | 0.393189                         | 0.455493 | 0.227377 | -23372.455862        | -8.65                                        |
| PdRu_L235 | 5     | 1.3           | 0.393189                         | 0.455493 | 0.231449 | -23372.502757        | -9.73                                        |
| PdRu_L236 | 5     | 1.4           | 0.393189                         | 0.455493 | 0.235520 | -23372.458156        | -8.70                                        |
| PdRu_L242 | 4     | 1.0           | 0.413864                         | 0.496522 | 0.220469 | -23372.550065        | -10.82                                       |
| PdRu_L243 | 4     | 1.1           | 0.413864                         | 0.496522 | 0.224540 | -23372.582275        | -11.56                                       |
| PdRu_L244 | 4     | 1.2           | 0.413864                         | 0.496522 | 0.228611 | -23372.551454        | -10.85                                       |
| PdRu_L250 | 3     | 0.8           | 0.434552                         | 0.537569 | 0.213560 | -23372.608181        | -12.16                                       |
| PdRu_L251 | 3     | 0.9           | 0.434552                         | 0.537569 | 0.217631 | -23372.651388        | -13.16                                       |
| PdRu_L252 | 3     | 1.0           | 0.434552                         | 0.537569 | 0.221702 | -23372.651627        | -13.16                                       |
| PdRu_L260 | 2     | 0.8           | 0.455226                         | 0.578598 | 0.214798 | -23372.538927        | -10.56                                       |
| PdRu_L261 | 2     | 0.9           | 0.455226                         | 0.578598 | 0.218869 | -23372.601361        | -12.00                                       |
| PdRu_L262 | 2     | 1.0           | 0.455226                         | 0.578598 | 0.222940 | -23372.617335        | -12.37                                       |
| PdRu_L271 | 1     | 0.9           | 0.475900                         | 0.619639 | 0.220102 | -23372.505069        | -9.78                                        |
| PdRu_L272 | 1     | 1.0           | 0.475900                         | 0.619639 | 0.224173 | -23372.562557        | -11.11                                       |
| PdRu_L273 | 1     | 1.1           | 0.475900                         | 0.619639 | 0.228245 | -23372.561236        | -11.08                                       |
| PdRu_L282 | 0     | 1.0           | 0.496574                         | 0.660667 | 0.225407 | -23372.546704        | -10.74                                       |

|           |   |     |          |          |          |               |        |
|-----------|---|-----|----------|----------|----------|---------------|--------|
| PdRu_L283 | 0 | 1.1 | 0.496574 | 0.660667 | 0.229478 | -23372.546929 | -10.75 |
| PdRu_L284 | 0 | 1.2 | 0.496574 | 0.660667 | 0.233549 | -23372.490737 | -9.45  |

(5) M = Rh

| Model     | Point | Height (Å) | Fractional coordinates of H atom |          |          | Final Energy (eV) | $\Delta E_H$ (kcal g-atom <sup>-1</sup> ) |
|-----------|-------|------------|----------------------------------|----------|----------|-------------------|-------------------------------------------|
|           |       |            | u                                | v        | w        |                   |                                           |
| H2        |       |            |                                  |          |          | -31.69234394      |                                           |
| PdRh      |       |            |                                  |          |          | -21361.328737     |                                           |
| PdRh_L207 | 8     | 1.5        | 0.333825                         | 0.334118 | 0.240238 | -21377.419080     | -5.63                                     |
| PdRh_L208 | 8     | 1.6        | 0.333825                         | 0.334118 | 0.244309 | -21377.476722     | -6.96                                     |
| PdRh_L209 | 8     | 1.7        | 0.333825                         | 0.334118 | 0.248380 | -21377.392813     | -5.02                                     |
| PdRh_L217 | 7     | 1.5        | 0.354238                         | 0.375374 | 0.240820 | -21377.470201     | -6.81                                     |
| PdRh_L218 | 7     | 1.6        | 0.354238                         | 0.375374 | 0.244891 | -21377.462029     | -6.62                                     |
| PdRh_L219 | 7     | 1.7        | 0.354238                         | 0.375374 | 0.248962 | -21377.342375     | -3.86                                     |
| PdRh_L226 | 6     | 1.4        | 0.374650                         | 0.416641 | 0.237331 | -21377.485618     | -7.16                                     |
| PdRh_L227 | 6     | 1.5        | 0.374650                         | 0.416641 | 0.241402 | -21377.485784     | -7.17                                     |
| PdRh_L228 | 6     | 1.6        | 0.374650                         | 0.416641 | 0.245474 | -21377.382941     | -4.80                                     |
| PdRh_L234 | 5     | 1.2        | 0.395063                         | 0.457909 | 0.229771 | -21377.507788     | -7.68                                     |
| PdRh_L235 | 5     | 1.3        | 0.395063                         | 0.457909 | 0.233842 | -21377.556185     | -8.79                                     |
| PdRh_L236 | 5     | 1.4        | 0.395063                         | 0.457909 | 0.237913 | -21377.510039     | -7.73                                     |
| PdRh_L242 | 4     | 1.0        | 0.415475                         | 0.499165 | 0.222211 | -21377.657352     | -11.13                                    |
| PdRh_L243 | 4     | 1.1        | 0.415475                         | 0.499165 | 0.226282 | -21377.681975     | -11.69                                    |
| PdRh_L244 | 4     | 1.2        | 0.415475                         | 0.499165 | 0.230353 | -21377.641498     | -10.76                                    |
| PdRh_L250 | 3     | 0.8        | 0.435901                         | 0.540439 | 0.214651 | -21377.770414     | -13.73                                    |
| PdRh_L251 | 3     | 0.9        | 0.435901                         | 0.540439 | 0.218722 | -21377.793053     | -14.25                                    |
| PdRh_L252 | 3     | 1.0        | 0.435901                         | 0.540439 | 0.222793 | -21377.773393     | -13.80                                    |
| PdRh_L260 | 2     | 0.8        | 0.456314                         | 0.581695 | 0.215233 | -21377.711066     | -12.36                                    |
| PdRh_L261 | 2     | 0.9        | 0.456314                         | 0.581695 | 0.219304 | -21377.744309     | -13.13                                    |
| PdRh_L262 | 2     | 1.0        | 0.456314                         | 0.581695 | 0.223376 | -21377.733663     | -12.88                                    |
| PdRh_L271 | 1     | 0.9        | 0.476726                         | 0.622962 | 0.219887 | -21377.644309     | -10.82                                    |
| PdRh_L272 | 1     | 1.0        | 0.476726                         | 0.622962 | 0.223958 | -21377.673955     | -11.51                                    |
| PdRh_L273 | 1     | 1.1        | 0.476726                         | 0.622962 | 0.228029 | -21377.649753     | -10.95                                    |
| PdRh_L281 | 0     | 0.9        | 0.497139                         | 0.664230 | 0.220469 | -21377.601625     | -9.84                                     |
| PdRh_L282 | 0     | 1.0        | 0.497139                         | 0.664230 | 0.224540 | -21377.645715     | -10.86                                    |
| PdRh_L283 | 0     | 1.1        | 0.497139                         | 0.664230 | 0.228611 | -21377.630721     | -10.51                                    |

(6) M = Au

| Model     | Point | Height (Å) | Fractional coordinates of H atom |          |          | Final Energy (eV) | $\Delta E_H$ (kcal g-atom <sup>-1</sup> ) |
|-----------|-------|------------|----------------------------------|----------|----------|-------------------|-------------------------------------------|
|           |       |            | u                                | v        | w        |                   |                                           |
| H2        |       |            |                                  |          |          | -31.69234394      |                                           |
| PdAu      |       |            |                                  |          |          | -21669.294232     |                                           |
| PdAu_L207 | 8     | 1.5        | 0.332971                         | 0.333667 | 0.251886 | -21684.825959     | 7.25                                      |
| PdAu_L208 | 8     | 1.6        | 0.332971                         | 0.333667 | 0.255957 | -21684.915737     | 5.18                                      |
| PdAu_L209 | 8     | 1.7        | 0.332971                         | 0.333667 | 0.260028 | -21684.842627     | 6.87                                      |
| PdAu_L217 | 7     | 1.5        | 0.353921                         | 0.375597 | 0.251043 | -21684.842675     | 6.87                                      |
| PdAu_L218 | 7     | 1.6        | 0.353921                         | 0.375597 | 0.255114 | -21684.915401     | 5.19                                      |
| PdAu_L219 | 7     | 1.7        | 0.353921                         | 0.375597 | 0.259185 | -21684.837712     | 6.98                                      |
| PdAu_L226 | 6     | 1.4        | 0.374870                         | 0.417515 | 0.246129 | -21684.798546     | 7.88                                      |
| PdAu_L227 | 6     | 1.5        | 0.374870                         | 0.417515 | 0.250200 | -21684.925662     | 4.95                                      |
| PdAu_L228 | 6     | 1.6        | 0.374870                         | 0.417515 | 0.254271 | -21684.897419     | 5.60                                      |
| PdAu_L234 | 5     | 1.2        | 0.395820                         | 0.459433 | 0.237140 | -21684.743331     | 9.16                                      |
| PdAu_L235 | 5     | 1.3        | 0.395820                         | 0.459433 | 0.241211 | -21684.945190     | 4.50                                      |

|           |   |     |          |          |          |               |       |
|-----------|---|-----|----------|----------|----------|---------------|-------|
| PdAu_L236 | 5 | 1.4 | 0.395820 | 0.459433 | 0.245282 | -21684.998748 | 3.27  |
| PdAu_L242 | 4 | 1.0 | 0.416784 | 0.501358 | 0.228155 | -21685.061625 | 1.82  |
| PdAu_L243 | 4 | 1.1 | 0.416784 | 0.501358 | 0.232226 | -21685.162202 | -0.50 |
| PdAu_L244 | 4 | 1.2 | 0.416784 | 0.501358 | 0.236297 | -21685.182905 | -0.98 |
| PdAu_L245 | 4 | 1.3 | 0.416784 | 0.501358 | 0.240368 | -21685.136275 | 0.10  |
| PdAu_L250 | 3 | 0.8 | 0.437733 | 0.543287 | 0.219170 | -21685.438689 | -6.88 |
| PdAu_L251 | 3 | 0.9 | 0.437733 | 0.543287 | 0.223241 | -21685.465739 | -7.50 |
| PdAu_L252 | 3 | 1.0 | 0.437733 | 0.543287 | 0.227312 | -21685.451913 | -7.18 |
| PdAu_L260 | 2 | 0.8 | 0.458683 | 0.585205 | 0.218327 | -21685.558931 | -9.65 |
| PdAu_L261 | 2 | 0.9 | 0.458683 | 0.585205 | 0.222398 | -21685.570063 | -9.91 |
| PdAu_L262 | 2 | 1.0 | 0.458683 | 0.585205 | 0.226470 | -21685.540107 | -9.22 |
| PdAu_L271 | 1 | 0.9 | 0.479633 | 0.627123 | 0.221552 | -21685.547822 | -9.40 |
| PdAu_L272 | 1 | 1.0 | 0.479633 | 0.627123 | 0.225623 | -21685.555205 | -9.57 |
| PdAu_L273 | 1 | 1.1 | 0.479633 | 0.627123 | 0.229694 | -21685.512827 | -8.59 |
| PdAu_L281 | 0 | 0.9 | 0.500582 | 0.669041 | 0.220709 | -21685.527281 | -8.92 |
| PdAu_L282 | 0 | 1.0 | 0.500582 | 0.669041 | 0.224780 | -21685.562329 | -9.73 |
| PdAu_L283 | 0 | 1.1 | 0.500582 | 0.669041 | 0.228851 | -21685.541076 | -9.24 |
